# Supplementary material
Source: HighWire-hosted journal article supplement (https://erj.ersjournals.com/content/13993003.00879-2022)
Supplement: inline-supplementary-material-1 [file inline-supplementary-material-1.pdf]

# 2022 ESC/ERS Guidelines for the diagnosis and treatment of pulmonary hypertension

## Supplementary data

Developed by the task force for the diagnosis and treatment of pulmonary hypertension of the European Society of Cardiology (ESC) and the European Respiratory Society (ERS).

Endorsed by the International Society for Heart and Lung Transplantation (ISHLT) and the European Reference Network on rare respiratory diseases (ERN-LUNG).

**Authors/Task Force Members:** Marc Humbert  (France), Gabor Kovacs (Austria), Marius M. Hoeper (Germany), Roberto Badagliacca (Italy), Rolf M.F. Berger (Netherlands), Margarita Brida (Croatia), Jørn Carlsen (Denmark), Andrew J.S. Coats (United Kingdom), Pilar Escribano-Subias (Spain), Pisana Ferrari (Italy), Diogenes S. Ferreira (Brazil), Hossein Ardeschir Ghofrani (Germany), George Giannakoulas (Greece), David G. Kiely (United Kingdom), Eckhard Mayer (Germany), Gergely Meszaros (Hungary), Blin Nagavci (Germany), Karen M. Olsson (Germany), Joanna Pepke-Zaba (United Kingdom), Jennifer K. Quint (United Kingdom), Göran Rådegran (Sweden), Gerald Simonneau (France), Olivier Sitbon (France), Thomy Tonia (Switzerland), Mark Toshner (United Kingdom), Jean-Luc Vachiery (Belgium), Anton Vonk Noordegraaf (Netherlands), Marion Delcroix  <sup>\*†</sup> (ERS Chairperson) (Belgium), Stephan Rosenkranz  <sup>\*†</sup> (ESC Chairperson) (Germany), and ESC/ERS Scientific Document Group

\* Corresponding authors: Stephan Rosenkranz, Clinic III for Internal Medicine (Department of Cardiology, Pulmonology and Intensive Care Medicine), and Cologne Cardiovascular Research Center (CCRC), Heart Center at the University Hospital Cologne, Kerpener Str. 62, 50937 Köln, Germany. Tel.: +49-221-478-32356. Email: stephan.rosenkranz@uk-koeln.de; and

Marion Delcroix, Clinical Department of Respiratory Diseases, Centre of Pulmonary Vascular Diseases, University Hospitals of Leuven, Herestraat 49, 3000 Leuven, Belgium. Tel.: +32 16 346813. Email: marion.delcroix@uzleuven.be

<sup>†</sup> The two chairpersons contributed equally to the document and are joint corresponding authors.

**Author/Task Force Member affiliations are listed in author information in the full text.**

<sup>1</sup> Representing the Association for European Paediatric and Congenital Cardiology (AEPC)

**ESC Clinical Practice Guidelines (CPG) Committee: listed in the Appendix in the full text.**

**ESC subspecialty communities having participated in the development of this document:**

**Associations:** Association of Cardiovascular Nursing & Allied Professions (ACNAP), European Association of Cardiovascular Imaging (EACVI), and Heart Failure Association (HFA).

**Councils:** Council on Cardiovascular Genomics.

**Working Groups:** Adult Congenital Heart Disease, Pulmonary Circulation and Right Ventricular Function, Thrombosis.

**Patient Forum**

The content of these European Society of Cardiology (ESC)/European Respiratory Society (ERS) Guidelines has been published for personal and educational use only. No commercial use is authorized. No part of the ESC/ERS Guidelines may be translated or reproduced in any form without written permission from the ESC and the ERS. Permission can be obtained upon submission of a written request to Oxford University Press, the publisher of the *European Heart Journal*, and the party authorized to handle such permissions on behalf of the ESC (journals.permissions@oup.com).

**Document Reviewers:** Markus Schwerzmann (ESC Review Coordinator) (Switzerland), Anh-Tuan Dinh-Xuan (ERS Review Coordinator) (France), Andy Bush (United Kingdom), Magdy Abdelhamid (Egypt), Victor Aboyans (France), Eloisa Arbustini (Italy), Riccardo Asteggiano (Italy), Joan-Albert Barberà (Spain), Maurice Beghetti (Switzerland), Jelena Čelutkienė (Lithuania), Maja Cikes (Croatia), Robin Condliffe (United Kingdom), Frances de Man (Netherlands), Volkmar Falk (Germany), Laurent Fauchier (France), Sean Gaine (Ireland), Nazzareno Galié (Italy), Wendy Gin-Sing (United Kingdom), John Granton (Canada), Ekkehard Grünig (Germany), Paul M. Hassoun (United States of America), Merel Hellemons (Netherlands), Tiny Jaarsma (Sweden), Barbro Kjellström (Sweden), Frederikus A. Klok (Netherlands), Aleksandra Konradi (Russian Federation), Konstantinos C. Koskinas (Switzerland), Dipak Kotecha (United Kingdom), Irene Lang (Austria), Basil S. Lewis (Israel), Ales Linhart (Czech Republic), Gregory Y.H. Lip (United Kingdom), Maja-Lisa Løchen (Norway), Alexander G. Mathioudakis (United Kingdom), Richard Mindham (United Kingdom), Shahin Moledina<sup>1</sup> (United Kingdom), Robert Naeije (Belgium), Jens Cosedis Nielsen (Denmark), Horst Olschewski (Austria), Isabelle Opitz (Switzerland), Steffen E. Petersen (United Kingdom), Eva Prescott (Denmark), Amina Rakisheva (Kazakhstan), Abilio Reis (Portugal), Arsen D. Ristić (Serbia), Nicolas Roche (France), Rita Rodrigues (Portugal), Christine Selton-Suty (France), Rogerio Souza (Brazil), Andrew J. Swift (United Kingdom), Rhian M. Touyz (Canada/United Kingdom), Silvia Ulrich (Switzerland), Martin R. Wilkins (United Kingdom), and Stephen John Wort (United Kingdom)

All experts involved in the development of these guidelines have submitted declarations of interest. These have been compiled in a report and simultaneously published in a supplementary document to the guidelines. The report is also available on the ESC website [www.escardio.org/Guidelines](http://www.escardio.org/Guidelines)

## Keywords

Guidelines • Pulmonary hypertension • Pulmonary arterial hypertension • Chronic thrombo-embolic pulmonary hypertension • Left heart disease • Congenital heart disease • Lung disease • Connective tissue disease • Endothelin receptor antagonists • Phosphodiesterase type 5 inhibitors • Soluble guanylate cyclase stimulators • Prostacyclin analogues • Prostacyclin receptor agonists • Pulmonary endarterectomy • Balloon pulmonary angioplasty • Lung transplantation

## Table of contents

|                                                                                                               |   |                                                                                                                          |   |
|---------------------------------------------------------------------------------------------------------------|---|--------------------------------------------------------------------------------------------------------------------------|---|
| 1. Abbreviations and acronyms .....                                                                           | 4 | 3.1.1. The upper limit of normal mean pulmonary arterial pressure and pulmonary vascular resistance .....                | 6 |
| 2. Introduction .....                                                                                         | 5 | 3.1.2. Prognostic relevance of mildly increased mean pulmonary arterial pressure and pulmonary vascular resistance ..... | 6 |
| 2.1. Methods for key narrative and Population, Intervention, Comparator, Outcome questions .....              | 5 | 3.1.3. Upper limit of normal and prognostic relevance of pulmonary arterial wedge pressure .....                         | 7 |
| 2.1.1. Question generation, evidence summary, and generation of recommendations .....                         | 5 | 4. Epidemiology and risk factors .....                                                                                   | 8 |
| 2.1.2. Presentation of recommendations .....                                                                  | 6 | 5. Pulmonary hypertension diagnosis .....                                                                                | 8 |
| 3. Definitions and classifications .....                                                                      | 6 | 5.1. Key narrative question #2: Should new echocardiographic probability of pulmonary hypertension approaches be         |   |
| 3.1. Key narrative question #1: Should a new haemodynamic definition of pulmonary hypertension be used? ..... | 6 |                                                                                                                          |   |

**Disclaimer:** The ESC/ERS Guidelines represent the views of the ESC and the ERS and were produced after careful consideration of the scientific and medical knowledge and the evidence available at the time of their publication. The ESC and the ERS are not responsible in the event of any contradiction, discrepancy, and/or ambiguity between the ESC/ERS Guidelines and any other official recommendations or guidelines issued by the relevant public health authorities, particularly in relation to good use of health care or therapeutic strategies. Health professionals are encouraged to take the ESC/ERS Guidelines fully into account when exercising their clinical judgment, as well as in the determination and implementation of preventive, diagnostic, or therapeutic medical strategies; however, the ESC/ERS Guidelines do not override, in any way whatsoever, the individual responsibility of health professionals to make appropriate and accurate decisions in consideration of each patient's health condition and in consultation with that patient and, where appropriate and/or necessary, the patient's caregiver. The ESC/ERS Guidelines do not exempt health professionals from taking into full and careful consideration the relevant official updated recommendations or guidelines issued by the competent public health authorities, in order to manage each patient's case in light of the scientifically accepted data pursuant to their respective ethical and professional obligations. It is also the health professional's responsibility to verify the applicable rules and regulations relating to drugs and medical devices at the time of prescription.

This article has been co-published with permission in the *European Heart Journal* and *European Respiratory Journal*. © the European Society of Cardiology and the European Respiratory Society 2022. All rights reserved. The articles are identical except for minor stylistic and spelling differences in keeping with each journal's style. Either citation can be used when citing this article. For permissions please e-mail: [journals.permissions@oup.com](mailto:journals.permissions@oup.com).

|                                                                                                                                                                                                                                                      |           |                                                                                                 |           |
|------------------------------------------------------------------------------------------------------------------------------------------------------------------------------------------------------------------------------------------------------|-----------|-------------------------------------------------------------------------------------------------|-----------|
| proposed in symptomatic patients with a suspicion of pulmonary hypertension? .....                                                                                                                                                                   | 8         | 10.2.1.1. Recommendations .....                                                                 | 16        |
| 5.2. Key narrative question #3: Should screening be offered to guide detection of pulmonary arterial hypertension in systemic sclerosis? .....                                                                                                       | 8         | <b>11. Pulmonary hypertension with unclear and/or multifactorial mechanisms (group 5) .....</b> | <b>16</b> |
| <b>6. Pulmonary arterial hypertension (group 1) .....</b>                                                                                                                                                                                            | <b>9</b>  | <b>12. Definition of a pulmonary hypertension centre .....</b>                                  | <b>16</b> |
| 6.1. Key narrative question #4: Should a risk-stratification strategy be used to guide treatment in patients with pulmonary arterial hypertension? .....                                                                                             | 9         | <b>13. Search strategies .....</b>                                                              | <b>16</b> |
| 6.2. PICO question I: Should initial oral double-combination therapy vs. monotherapy be used in symptomatic patients with pulmonary arterial hypertension? .....                                                                                     | 9         | 13.1. Literature search strategies for PICO I .....                                             | 16        |
| 6.2.1. Conclusions .....                                                                                                                                                                                                                             | 10        | 13.1.1. Pubmed .....                                                                            | 16        |
| 6.2.1.1. Recommendations .....                                                                                                                                                                                                                       | 10        | 13.1.2. Cochrane .....                                                                          | 17        |
| <b>7. Specific pulmonary arterial hypertension subsets .....</b>                                                                                                                                                                                     | <b>12</b> | 13.2. Literature search strategies for PICO II .....                                            | 17        |
| 7.1. General classification of paediatric pulmonary hypertension (from 6th World Symposium on Pulmonary Hypertension) .....                                                                                                                          | 12        | 13.2.1. Pubmed .....                                                                            | 17        |
| <b>8. Pulmonary hypertension associated with left heart disease (group 2) .....</b>                                                                                                                                                                  | <b>12</b> | 13.2.2. Cochrane .....                                                                          | 18        |
| 8.1. Pathophysiology of pulmonary hypertension and right ventricular dysfunction in group 2 pulmonary hypertension .....                                                                                                                             | 12        | 13.3. Literature search strategies for PICO III .....                                           | 18        |
| 8.2. Diagnosis .....                                                                                                                                                                                                                                 | 14        | 13.3.1. Pubmed .....                                                                            | 18        |
| 8.3. Key narrative question #5: Should drugs approved for pulmonary arterial hypertension be used in patients with pulmonary hypertension associated with left heart disease? .....                                                                  | 14        | 13.3.2. Cochrane .....                                                                          | 19        |
| 8.4. PICO question II: Should phosphodiesterase type 5 inhibitors be used in patients with combined post- and pre-capillary pulmonary hypertension due to heart failure with preserved ejection fraction? .....                                      | 14        | 13.4. Literature search strategies for PICO IV .....                                            | 19        |
| 8.4.1. Conclusions .....                                                                                                                                                                                                                             | 14        | 13.4.1. Pubmed .....                                                                            | 19        |
| 8.4.1.1. Recommendations .....                                                                                                                                                                                                                       | 14        | 13.4.2. Cochrane .....                                                                          | 19        |
| <b>9. Pulmonary hypertension associated with lung diseases and/or hypoxia (group 3) .....</b>                                                                                                                                                        | <b>15</b> | 13.5. Literature search strategies for key narrative question 1 ..                              | 19        |
| 9.1. Key narrative question #6: Should drugs approved for pulmonary arterial hypertension be used in patients with pulmonary hypertension due to chronic obstructive pulmonary disease? .....                                                        | 15        | 13.5.1. Search strategies (main) .....                                                          | 19        |
| 9.2. Key narrative question #7: Should drugs approved for pulmonary arterial hypertension be used in patients with pulmonary hypertension due to interstitial lung diseases? .....                                                                   | 15        | 13.5.2. Pubmed .....                                                                            | 20        |
| 9.3. PICO question III: Should phosphodiesterase 5 inhibitors be used in patients with severe pulmonary hypertension due to interstitial lung diseases? .....                                                                                        | 16        | 13.5.3. Cochrane .....                                                                          | 21        |
| 9.3.1. Conclusions .....                                                                                                                                                                                                                             | 16        | 13.6. Literature search strategies for key narrative question 2 ..                              | 21        |
| 9.3.1.1. Recommendations .....                                                                                                                                                                                                                       | 16        | 13.6.1. Search strategies (main) .....                                                          | 21        |
| <b>10. Chronic thrombo-embolic pulmonary hypertension (group 4) .....</b>                                                                                                                                                                            | <b>16</b> | 13.6.1.1. Cardiopulmonary exercise testing in pulmonary hypertension for diagnosis .....        | 21        |
| 10.1. Key narrative question #8: Should balloon pulmonary angioplasty or medical therapy be used in patients with inoperable chronic thrombo-embolic pulmonary hypertension? .....                                                                   | 16        | 13.6.1.2. Echocardiography in pulmonary hypertension for diagnosis .....                        | 22        |
| 10.2. PICO question IV: Should patients with chronic thrombo-embolic pulmonary hypertension who are considered inoperable but candidates for balloon pulmonary angioplasty receive medical therapy before interventional therapy is initiated? ..... | 16        | 13.6.2. Pubmed .....                                                                            | 22        |
| 10.2.1. Conclusions .....                                                                                                                                                                                                                            | 16        | 13.6.3. Cochrane .....                                                                          | 22        |
|                                                                                                                                                                                                                                                      |           | 13.7. Literature search strategies for key narrative question 3 ..                              | 23        |
|                                                                                                                                                                                                                                                      |           | 13.7.1. Search strategies (main) .....                                                          | 23        |
|                                                                                                                                                                                                                                                      |           | 13.7.2. Pubmed .....                                                                            | 23        |
|                                                                                                                                                                                                                                                      |           | 13.7.3. Cochrane .....                                                                          | 23        |
|                                                                                                                                                                                                                                                      |           | 13.8. Literature search strategies for key narrative question 4 ..                              | 23        |
|                                                                                                                                                                                                                                                      |           | 13.8.1. Search strategies (main) .....                                                          | 23        |
|                                                                                                                                                                                                                                                      |           | 13.8.2. Pubmed .....                                                                            | 23        |
|                                                                                                                                                                                                                                                      |           | 13.8.3. Cochrane .....                                                                          | 24        |
|                                                                                                                                                                                                                                                      |           | 13.9. Literature search strategies for key narrative question 5 ..                              | 24        |
|                                                                                                                                                                                                                                                      |           | 13.9.1. Pubmed .....                                                                            | 24        |
|                                                                                                                                                                                                                                                      |           | 13.9.2. Cochrane .....                                                                          | 25        |
|                                                                                                                                                                                                                                                      |           | 13.10. Literature search strategies for key narrative question 6                                | 25        |
|                                                                                                                                                                                                                                                      |           | 13.10.1. Pubmed .....                                                                           | 25        |
|                                                                                                                                                                                                                                                      |           | 13.10.2. Cochrane .....                                                                         | 26        |
|                                                                                                                                                                                                                                                      |           | 13.11. Literature search strategies for key narrative question 7                                | 26        |
|                                                                                                                                                                                                                                                      |           | 13.11.1. Pubmed .....                                                                           | 26        |
|                                                                                                                                                                                                                                                      |           | 13.11.2. Cochrane .....                                                                         | 27        |
|                                                                                                                                                                                                                                                      |           | 13.12. Literature search strategies for key narrative question 8                                | 27        |
|                                                                                                                                                                                                                                                      |           | 13.12.1. Pubmed .....                                                                           | 27        |
|                                                                                                                                                                                                                                                      |           | 13.12.2. Cochrane .....                                                                         | 27        |
|                                                                                                                                                                                                                                                      |           | <b>14. PRISMA diagrams .....</b>                                                                | <b>28</b> |
|                                                                                                                                                                                                                                                      |           | 14.1. Prisma diagram PICO I .....                                                               | 28        |
|                                                                                                                                                                                                                                                      |           | 14.2. Prisma diagram PICO II .....                                                              | 29        |
|                                                                                                                                                                                                                                                      |           | 14.3. Prisma diagram PICO III .....                                                             | 30        |
|                                                                                                                                                                                                                                                      |           | 14.4. Prisma diagram PICO IV .....                                                              | 31        |
|                                                                                                                                                                                                                                                      |           | 14.5. Prisma diagram key narrative question 1 .....                                             | 32        |
|                                                                                                                                                                                                                                                      |           | 14.6. Prisma diagram key narrative question 2 .....                                             | 38        |
|                                                                                                                                                                                                                                                      |           | 14.7. Prisma diagram key narrative question 3 .....                                             | 40        |
|                                                                                                                                                                                                                                                      |           | 14.8. Prisma diagram key narrative question 4 .....                                             | 41        |

|                                                                    |            |
|--------------------------------------------------------------------|------------|
| 14.9. Prisma diagram key narrative question 5 .....                | 42         |
| 14.10. Prisma diagram key narrative question 6 .....               | 43         |
| 14.11. Prisma diagram key narrative question 7 .....               | 44         |
| 14.12. Prisma diagram key narrative question 8 .....               | 45         |
| <b>15. Guideline development tool (GDT) evidence profile .....</b> | <b>46</b>  |
| 15.1. Guideline development tool evidence profile for PICO I ..    | 46         |
| 15.2. Guideline development tool evidence profile for PICO II      | 48         |
| 15.3. Guideline development tool evidence profile for PICO III     | 50         |
| 15.4. Guideline development tool evidence profile for PICO IV      | 53         |
| <b>16. Evidence to Decision (EtD) tables .....</b>                 | <b>55</b>  |
| 16.1. Evidence to Decision for PICO I .....                        | 55         |
| 16.2. Evidence to Decision for PICO II .....                       | 59         |
| 16.3. Evidence to Decision for PICO III .....                      | 64         |
| 16.4. Evidence to Decision for PICO IV .....                       | 69         |
| 16.5. Evidence to Decision for key narrative question 2 .....      | 73         |
| 16.6. Evidence to Decision for key narrative question 3 .....      | 79         |
| 16.7. Evidence to Decision for key narrative question 4 .....      | 86         |
| 16.8. Evidence to Decision for key narrative question 5 .....      | 92         |
| 16.9. Evidence to Decision for key narrative question 6 .....      | 96         |
| 16.10. Evidence to Decision for key narrative question 7 .....     | 99         |
| 16.11. Evidence to Decision for key narrative question 8 .....     | 102        |
| <b>17. References .....</b>                                        | <b>106</b> |

## List of tables

|                                                                                                                        |     |
|------------------------------------------------------------------------------------------------------------------------|-----|
| Table S1 Pulmonary arterial hypertension haemodynamic definition used in clinical trials .....                         | 7   |
| Table S2 Imaging-derived variables of prognostic relevance and cut-off values in pulmonary arterial hypertension ..... | 9   |
| Table S3 Recommendations for efficacy of drug monotherapy for pulmonary arterial hypertension .....                    | 10  |
| Table S4 Potentially significant drug interactions with pulmonary arterial hypertension-targeted therapies .....       | 10  |
| Table S5 Persistent pulmonary hypertension of the newborn and associated disorders .....                               | 12  |
| Table S6 Congenital post-capillary obstructive lesions .....                                                           | 12  |
| Table S7 Developmental lung disorders associated with pulmonary hypertension .....                                     | 12  |
| Table S8 Complex congenital heart disease .....                                                                        | 12  |
| Table S9 Evidence to Decision for PICO I .....                                                                         | 55  |
| Table S10 Evidence to Decision for PICO II .....                                                                       | 59  |
| Table S11 Evidence to Decision for PICO III .....                                                                      | 64  |
| Table S12 Evidence to Decision for PICO IV .....                                                                       | 69  |
| Table S13 Evidence to Decision for key narrative question 2 .....                                                      | 73  |
| Table S14 Evidence to Decision for key narrative question 3 .....                                                      | 79  |
| Table S15 Evidence to Decision for key narrative question 4 .....                                                      | 86  |
| Table S16 Evidence to Decision for key narrative question 5 .....                                                      | 92  |
| Table S17 Evidence to Decision for key narrative question 6 .....                                                      | 96  |
| Table S18 Evidence to Decision for key narrative question 7 .....                                                      | 99  |
| Table S19 Evidence to Decision for key narrative question 8 .....                                                      | 102 |

## List of figures

|                                                                                                                 |    |
|-----------------------------------------------------------------------------------------------------------------|----|
| Figure S1 Pathophysiology of pulmonary hypertension due to heart failure with preserved ejection fraction ..... | 13 |
|-----------------------------------------------------------------------------------------------------------------|----|

|                                                                                                                                        |    |
|----------------------------------------------------------------------------------------------------------------------------------------|----|
| Figure S2 Indications and interpretation of haemodynamic assessment in pulmonary hypertension associated with left heart disease ..... | 14 |
| Figure S3 Approach to assessment of suspected pulmonary hypertension in patients with lung disease .....                               | 15 |

## 1. Abbreviations and acronyms

|         |                                                                                           |
|---------|-------------------------------------------------------------------------------------------|
| 6MWD    | 6-minute walking distance                                                                 |
| 6MWT    | 6-minute walking test                                                                     |
| ABG     | Arterial blood gas analysis                                                               |
| AE      | Adverse events                                                                            |
| ASIG    | Australian Scleroderma Interest Group                                                     |
| BNP     | Brain natriuretic peptide                                                                 |
| BPA     | Balloon pulmonary angioplasty                                                             |
| cGMP    | Cyclic guanosine monophosphate                                                            |
| CI      | Cardiac index/Confidence interval                                                         |
| cMRI    | Cardiac magnetic resonance imaging                                                        |
| COMPERA | Comparative, Prospective Registry of Newly Initiated Therapies for Pulmonary Hypertension |
| COPD    | Chronic obstructive pulmonary disease                                                     |
| CpcPH   | Combined post- and pre-capillary pulmonary hypertension                                   |
| CPET    | Cardiopulmonary exercise testing                                                          |
| CT      | Computed tomography                                                                       |
| CTD     | Connective tissue disease                                                                 |
| CTEPH   | Chronic thrombo-embolic pulmonary hypertension                                            |
| CTPA    | Computed tomography pulmonary angiography                                                 |
| DLCO    | Diffusion capacity for carbon monoxide                                                    |
| DPG     | Diastolic pressure gradient                                                               |
| ECG     | Electrocardiogram                                                                         |
| ERA     | Endothelin receptor antagonist                                                            |
| ERS     | European Respiratory Society                                                              |
| ESC     | European Society of Cardiology                                                            |
| EtD     | Evidence to Decision                                                                      |
| ESV     | End systolic volume                                                                       |
| FPHR    | French Pulmonary Hypertension Registry                                                    |
| FVC     | Forced vital capacity                                                                     |
| GDT     | Guideline development tool                                                                |
| GRADE   | Grading of Recommendations, Assessment, Development, and Evaluations                      |
| HFpEF   | Heart failure with preserved ejection fraction                                            |
| IIP     | Idiopathic interstitial pneumonia                                                         |
| ILD     | Interstitial lung disease                                                                 |
| IPF     | Idiopathic pulmonary fibrosis                                                             |
| KQ      | Key question                                                                              |
| LA      | Left atrium/left atrial                                                                   |
| LAP     | Left atrial pressure                                                                      |
| LHD     | Left heart disease                                                                        |
| LV      | Left ventricle/left ventricular                                                           |
| LVEDP   | Left ventricular end-diastolic pressure                                                   |
| LVEDVI  | Left ventricular end-diastolic volume index                                               |
| LVEI    | Left ventricular eccentricity index                                                       |
| MESH    | Medical Subject Heading                                                                   |
| mPAP    | Mean pulmonary arterial pressure                                                          |
| MRI     | Magnetic resonance imaging                                                                |

|                     |                                                                                                           |
|---------------------|-----------------------------------------------------------------------------------------------------------|
| NO-cGMP             | Nitric oxide–cyclic guanosine monophosphate                                                               |
| NPV                 | Negative predictive value                                                                                 |
| NT-proBNP           | N-terminal pro-brain natriuretic peptide                                                                  |
| PA                  | Pulmonary artery                                                                                          |
| PAC                 | Pulmonary artery compliance                                                                               |
| PaCO <sub>2</sub>   | Partial pressure of arterial carbon dioxide                                                               |
| PAH                 | Pulmonary arterial hypertension                                                                           |
| PaO <sub>2</sub>    | Partial pressure of arterial oxygen                                                                       |
| PAP                 | Pulmonary arterial pressure                                                                               |
| PAWP                | Pulmonary arterial wedge pressure                                                                         |
| PDE5i               | Phosphodiesterase 5 inhibitor                                                                             |
| PETCO <sub>2</sub>  | End-tidal partial pressure of carbon dioxide                                                              |
| PH                  | Pulmonary hypertension                                                                                    |
| PICO                | Population, Intervention, Comparator, Outcome                                                             |
| PPV                 | Positive predictive value                                                                                 |
| PVD                 | Pulmonary vascular disease                                                                                |
| PVR                 | Pulmonary vascular resistance                                                                             |
| PVRI                | Pulmonary vascular resistance index                                                                       |
| QoL                 | Quality of life                                                                                           |
| RA                  | Right atrium/right atrial                                                                                 |
| RCT                 | Randomized controlled trial                                                                               |
| REVEAL              | Registry to Evaluate Early and Long-Term PAH Disease Management                                           |
| RHC                 | Right heart catheterization                                                                               |
| RV                  | Right ventricle/right ventricular                                                                         |
| RVEDA               | Right ventricular end-diastolic area                                                                      |
| RVEDVI              | Right ventricular end-diastolic volume index                                                              |
| RVEF                | Right ventricular ejection fraction                                                                       |
| RVESRI              | Right ventricular end-systolic remodelling index                                                          |
| RV-FAC              | Right ventricular fractional area change                                                                  |
| RVOT AT             | Right ventricular outflow tract acceleration time                                                         |
| RV-SD4,             | Standard deviation of the times to peak-systolic strain for the four mid-basal right ventricular segments |
| SAE                 | Severe adverse event                                                                                      |
| SaO <sub>2</sub>    | Arterial oxygen saturation                                                                                |
| sGC                 | Soluble guanylate cyclase                                                                                 |
| SPAHR               | Swedish Pulmonary Arterial Hypertension Registry                                                          |
| sPAP                | Systolic pulmonary arterial pressure                                                                      |
| SSc                 | Systemic sclerosis                                                                                        |
| SV                  | Stroke volume                                                                                             |
| SVI                 | Stroke volume index                                                                                       |
| TAPSE               | Tricuspid annular plane systolic excursion                                                                |
| TPR                 | Total pulmonary resistance                                                                                |
| TR                  | Tricuspid regurgitation                                                                                   |
| TRPG                | Tricuspid regurgitation pressure gradient                                                                 |
| VE/VCO <sub>2</sub> | Ventilatory equivalent for carbon dioxide                                                                 |
| WU                  | Wood units                                                                                                |

## 2. Introduction

### 2.1. Methods for key narrative and Population, Intervention, Comparator, Outcome questions

#### 2.1.1. Question generation, evidence summary, and generation of recommendations

The evidence for practice guidelines was approached in three different ways, combining the different approaches used by the two societies:

(a) Population, Intervention, Comparator, Outcome (PICO) questions: four questions that were considered highly important were formulated in the PICO format and assessed via a full systematic review and application of the Grading of Recommendations, Assessment, Development, and Evaluations (GRADE) approach and the Evidence to Decision (EtD) framework. Following the GRADE process, the Task Force made a list of outcomes that are considered important for clinical decision-making, and rated their importance on a scale of 1–9 (mean scores of 7–9 indicating a ‘critical outcome’, 4–6 indicating an ‘important outcome’, and 1–3 indicating ‘not important outcome’).<sup>1</sup> After discussion, consensus was reached about the critical and important outcomes for each PICO question.

Systematic literature searches were designed by information specialists with the input of the clinical experts. The MEDLINE (via PubMed) and Cochrane databases were searched from 1990 onwards to December 2020. Randomized controlled trials (RCTs) were prioritized for inclusion. The retrieved references were screened for inclusion by the PICO leader and one additional Task Force member, if required. PRISMA diagrams were generated reflecting the study selection process. Data from retrieved studies were entered into RevMan v. software. External collaborators created evidence profiles for each PICO question, following the GRADE approach. The certainty of the evidence for each outcome was rated as ‘high’, ‘moderate’, ‘low’, or ‘very low’. The certainty of the evidence was initially rated as ‘high’ if the evidence came from RCTs, and was subsequently downgraded by one or two levels if results from individual studies were at serious or very serious risk of bias,<sup>2</sup> there were serious inconsistencies in the results across studies,<sup>3</sup> the evidence was indirect,<sup>4</sup> the data were imprecise,<sup>5</sup> or publication bias was thought to be likely. The Task Force developed recommendations for the PICO questions using the GRADE Evidence to Decision framework, which considers different factors, such as: the quality of the evidence, balance of desirable and undesirable effects, patient values and preferences, resource use, health equity, acceptability, and feasibility.<sup>6</sup> Each recommendation was rated as ‘strong’ or ‘conditional’, following the GRADE principles.<sup>7</sup> Recommendations and their direction and strength were drafted by the PICO leaders, discussed by Task Force members at online meetings, and approved by voting on 19 January 2022.

(b) Key Narrative questions: eight questions that were considered of key importance were formulated and assessed via systematic literature searches and application of the EtD framework. As with PICO questions, systematic literature searches were centralized and designed by information specialists with the input of the clinical experts. The MEDLINE (via PubMed) and Cochrane databases were searched from 1990 onwards to December 2020. For some questions (Key question [KQ]1, KQ2), searches were designed and conducted by individual Task Force members and an information specialist, prior to the centralized searches. In these cases, these acted as the main searches, which were then supplemented with the centralized ones. The results of the searches were screened by Task Force members and described in a narrative way. PRISMA

diagrams were generated reflecting the study selection process. The evidence was not graded using the GRADE approach, but with the usual European Society of Cardiology (ESC) methodology. The usual ESC methodology was followed for making recommendations. However, for these questions, the recommendation-making process was documented using the EtD framework, following European Respiratory Society (ERS) process.<sup>8</sup>

- (c) The remaining topics of interest were assessed using the process commonly followed in the ESC Guidelines. Briefly, for each topic, a literature search was undertaken and only peer reviewed, published literature included. Grading tables were then created to describe the level of confidence in the recommendation provided and the quality of evidence supporting the recommendation. These tables were colour-coded for each interpretation.

### 2.1.2. Presentation of recommendations

For all questions, recommendations are presented using the usual ESC classification. For the PICO questions, recommendations are also presented as 'strong' or 'conditional' following the GRADE process. The overall quality of evidence for every question is also indicated (high, moderate, low, or very low).

## 3. Definitions and classifications

### 3.1. Key narrative question #1: Should a new haemodynamic definition of pulmonary hypertension be used?

Chosen parameters were mean pulmonary arterial pressure (mPAP), pulmonary arterial wedge pressure (PAWP), and pulmonary vascular resistance (PVR); 1. Normal values; 2. Prognostic relevance; and 3. Therapy.

#### 3.1.1. The upper limit of normal mean pulmonary arterial pressure and pulmonary vascular resistance

In 2009, a comprehensive, systematic, literature review analysed haemodynamic data obtained by right heart catheterization (RHC) at rest and during exercise from 1187 healthy individuals from 47 studies. The data revealed that in the supine position at rest the normal mPAP is  $14.0 \pm 3.3$  mmHg and the normal PVR is  $0.9 \pm 0.4$  Wood units (WU).<sup>9</sup> The current systematic literature review confirmed the main findings of this study and provides a basis for the haemodynamic definitions of pulmonary hypertension (PH). Of special value are studies invasively investigating pulmonary haemodynamics of healthy volunteers who had no symptoms or clinically suspected pulmonary vascular disease (PVD), and who also underwent comprehensive clinical investigations in order to exclude significant left heart or lung disease.<sup>10–26</sup>

#### 3.1.2. Prognostic relevance of mildly increased mean pulmonary arterial pressure and pulmonary vascular resistance

Based on the systemic literature research, there are a handful of studies investigating the prognostic relevance of mPAP, PVR, or PAWP in large patient collectives. In addition, most of the studies used pre-defined cut-offs or the actual thresholds for PH in their analysis, and few studies used an unbiased approach.

Maron and colleagues performed two important analyses, retrospectively investigating the prognostic relevance of mPAP<sup>27</sup> and PVR<sup>28</sup> in  $>20\,000$  (and  $>40\,000$  in the case of PVR) US veterans undergoing RHC. When treating mPAP and PVR as continuous variables, the mortality hazard increased, beginning at 19 mmHg and 2.2 WU, illustrating a continuum of risk according to mPAP and PVR levels. The prognostic relevance of  $mPAP \geq 19$  mmHg and  $PVR \geq 2.2$  WU was confirmed in an independent cohort of  $>3500$  patients.<sup>28</sup>

In other general cohorts of patients undergoing RHC, similar mPAP thresholds were associated with mortality. Assad and colleagues found that after adjusting for clinical covariates, patients with mPAP 19–24 mmHg had impaired survival compared with those with  $mPAP < 19$  mmHg.<sup>29</sup> Douschan and colleagues also found that a mildly elevated mPAP is a predictor of mortality, and the first prognostically relevant threshold was found by a tree based analysis at  $\geq 17$  mmHg.<sup>30</sup> After correcting for age and comorbidities, an mPAP 21–24 mmHg was associated with increased mortality compared with patients with an  $mPAP \leq 20$  mmHg. Heresi and colleagues also found that an  $mPAP > 20$  mmHg was associated with worse survival,<sup>31</sup> and an analysis of the haemodynamic data of 1371 predominantly Black patients undergoing right and left heart catheterization revealed that an  $mPAP \geq 20$  mmHg was associated with impaired prognosis.<sup>32</sup>

Some recent studies have confirmed a prognostic relevance of  $mPAP > 20$  mmHg in specific patient cohorts. Kimura and colleagues found that mPAP independently determined survival in patients with idiopathic pulmonary fibrosis (IPF), and  $mPAP > 20$  mmHg proved to be the optimal threshold for predicting the prognosis.<sup>33</sup> Similarly, the  $mPAP > 20$  mmHg threshold was prognostically relevant in patients with systemic sclerosis (SSc),<sup>34</sup> and the  $mPAP \geq 20$  mmHg threshold in patients with connective tissue disease-associated interstitial lung disease (ILD).<sup>35</sup> Patients with SSc and an  $mPAP 21–24$  mmHg more frequently developed an  $mPAP \geq 25$  mmHg compared with those with an  $mPAP \leq 20$  mmHg, suggesting that mildly elevated mPAP is associated with frequent progression of PVD.<sup>36,37</sup>

The clinical relevance of  $PVR \geq 2$  WU was investigated in patients with SSc in a multicentre retrospective study.<sup>38</sup> The data suggested that  $PVR \geq 2$  WU is associated with clinically significant PVD and reduced survival. In chronic left heart diseases, the prognostic relevance of a pre-defined  $PVR > 3$  WU has been confirmed in several studies.<sup>39–41</sup> In a recent study, the clinical development of patients with an  $mPAP \geq 25$  mmHg ( $mPAP 27$  mmHg [interquartile range (IQR), 25–30]), a  $PAWP \leq 15$  mmHg, and  $PVR < 3$  WU ( $PVR 2.2$  WU [IQR: 1.9–2.7]) receiving pulmonary arterial hypertension (PAH) therapy was evaluated, and adverse outcomes (estimated 1 year and 5 year

survival rates of 98% and 84%, respectively; death attributed to PAH in 33% of patients) were frequently observed, suggesting that even a mild elevation of PVR may be clinically significant.<sup>42</sup>

### 3.1.3. Upper limit of normal and prognostic relevance of pulmonary arterial wedge pressure

Studies providing PAWP values in healthy controls are heterogeneous. In some studies the values are relatively low, suggesting an upper limit of normal of  $\leq 12$  mmHg.<sup>10,20,21,24,25,43–73</sup> Other studies

suggest that even healthy subjects may present with a PAWP  $> 12$  mmHg.<sup>11–13,16–19,22,23,26,74–91</sup> A PAWP  $\geq 12$  mmHg was found to be a strong and independent predictor of both short-term and long-term survival after myocardial infarction, revealing a gradual increase in the 10 year mortality risk.<sup>92</sup> A recent systematic review confirmed that an elevated PAWP is an independent predictor of poor prognosis in heart failure.<sup>93</sup>

See the following sections for the search strategy (13.5) and PRISMA diagram (14.5).

**Table S1 Pulmonary arterial hypertension haemodynamic definition used in clinical trials**

| Drug name/trial name                                                                                                                                                                                                                                                                                                                                                                                                 | Author, year of publication                                                                       | Pulmonary hypertension group included                                                                                                                                                      | Specifically mentioned haemodynamic inclusion criteria                     |
|----------------------------------------------------------------------------------------------------------------------------------------------------------------------------------------------------------------------------------------------------------------------------------------------------------------------------------------------------------------------------------------------------------------------|---------------------------------------------------------------------------------------------------|--------------------------------------------------------------------------------------------------------------------------------------------------------------------------------------------|----------------------------------------------------------------------------|
| Epoprostenol                                                                                                                                                                                                                                                                                                                                                                                                         | Rubin <i>et al. Ann Int Med</i> 1990 <sup>94</sup><br>Barst <i>et al. NEJM</i> 1996 <sup>95</sup> | Primary PH                                                                                                                                                                                 | NA                                                                         |
| Bosentan/<br>BREATHE-1                                                                                                                                                                                                                                                                                                                                                                                               | Rubin <i>et al. NEJM</i> 2002 <sup>96</sup>                                                       | Symptomatic, severe PAH (primary or associated with CTD)                                                                                                                                   | mPAP $> 25$ mmHg, PAWP $< 15$ mmHg, and PVR $> 3$ WU                       |
| Inhaled iloprost/AIR                                                                                                                                                                                                                                                                                                                                                                                                 | Olschewski <i>et al. NEJM</i> 2002 <sup>97</sup>                                                  | Primary PH and selected forms of non-primary PH (appetite suppressant-associated PH, scleroderma-associated PH, inoperable chronic thrombo-embolic PH)                                     | mPAP $> 30$ mmHg, PAWP $\leq 15$ mmHg, and CI 1.5–4.0 L/min/m <sup>2</sup> |
| Treprostinil s.c.                                                                                                                                                                                                                                                                                                                                                                                                    | Simonneau <i>et al. AJRCCM</i> 2002 <sup>98</sup>                                                 | Primary PH or PH associated with CTD or associated with congenital systemic-to-pulmonary shunts                                                                                            | mPAP $\geq 25$ mmHg, PAWP $\leq 15$ mmHg, and PVR $> 3$ WU                 |
| <b>2004 ESC Guideline PAH haemodynamic definition:</b> PAH is defined by an mPAP $> 25$ mmHg at rest or $> 30$ mmHg with exercise, by PAWP $\leq 15$ mmHg, and PVR $> 3$ WU. <sup>99</sup>                                                                                                                                                                                                                           |                                                                                                   |                                                                                                                                                                                            |                                                                            |
| Sildenafil/<br>SUPER                                                                                                                                                                                                                                                                                                                                                                                                 | Galiè <i>et al. NEJM</i> 2005 <sup>100</sup>                                                      | PAH (idiopathic, associated with CTD, or occurring after surgical repair of congenital systemic-to-pulmonary shunts that had been performed at least 5 years previously)                   | mPAP $\geq 25$ mmHg, PAWP $\leq 15$ mmHg                                   |
| Ambrisentan/<br>ARIES                                                                                                                                                                                                                                                                                                                                                                                                | Galiè <i>et al. Circulation</i> 2008 <sup>101</sup>                                               | PAH (idiopathic or associated with CTD, HIV infection, or anorexigen use)                                                                                                                  | Defined according to current guidelines                                    |
| Tadalafil/<br>PHIRST                                                                                                                                                                                                                                                                                                                                                                                                 | Galiè <i>et al. Circulation</i> 2009 <sup>102</sup>                                               | Symptomatic PAH that was idiopathic/heritable or related to anorexigen use, CTD, HIV infection, or congenital systemic-to-pulmonary shunts                                                 | mPAP $\geq 25$ mmHg, PAWP $\leq 15$ mmHg, and PVR $\geq 3$ WU              |
| <b>2009 ESC/ERS Guideline PAH haemodynamic definition:</b> PAH is a clinical condition characterized by the presence of pre-capillary PH (mPAP $\geq 25$ mmHg, PAWP $\leq 15$ mmHg, CO normal or reduced) in the absence of other causes of pre-capillary PH such as PH due to lung diseases, chronic thrombo-embolic PH, or other rare diseases. <sup>103,104</sup>                                                 |                                                                                                   |                                                                                                                                                                                            |                                                                            |
| Macitentan/<br>SERAPHIN                                                                                                                                                                                                                                                                                                                                                                                              | Pulido <i>et al. NEJM</i> 2013 <sup>105</sup>                                                     | Idiopathic or heritable PAH or PAH related to CTD, repaired congenital systemic-to-pulmonary shunts, HIV infection, or drug use or toxin exposure were eligible for inclusion in the trial | Defined according to current guidelines                                    |
| Riociguat/<br>PATENT-1                                                                                                                                                                                                                                                                                                                                                                                               | Ghofrani <i>et al. NEJM</i> 2013 <sup>106</sup>                                                   | Symptomatic PAH (idiopathic, familial, or associated with CTD, congenital heart disease, portal hypertension with liver cirrhosis, or anorexigen or amphetamine use)                       | mPAP $\geq 25$ mmHg, PVR $> 3.75$ WU                                       |
| <b>2015 ESC/ERS PH Guideline PAH haemodynamic definition:</b> The term PAH describes a group of PH patients (mPAP $\geq 25$ mmHg) characterized haemodynamically by the presence of pre-capillary PH, defined by PAWP $\leq 15$ mmHg and PVR $\geq 3$ WU in the absence of other causes of pre-capillary PH, such as PH due to lung diseases, chronic thrombo-embolic PH, or other rare diseases. <sup>107,108</sup> |                                                                                                   |                                                                                                                                                                                            |                                                                            |
| Selexipag/<br>GRIPHON                                                                                                                                                                                                                                                                                                                                                                                                | Sitbon <i>et al. NEJM</i> 2015 <sup>109</sup>                                                     | Idiopathic or heritable PAH or PAH associated with HIV infection, drug use or toxin exposure, CTD, or repaired congenital systemic-to-pulmonary shunts                                     | PVR $\geq 5$ WU                                                            |

CI, cardiac index; CTD, connective tissue disease; HIV, human immunodeficiency virus; mPAP, mean pulmonary arterial pressure; PAH, pulmonary arterial hypertension; PAWP, pulmonary arterial wedge pressure; PH, pulmonary hypertension; PVR, pulmonary vascular resistance; WU, Wood units.

## 4. Epidemiology and risk factors

No supplementary data for this section.

## 5. Pulmonary hypertension diagnosis

### 5.1. Key narrative question #2: Should new echocardiographic probability of pulmonary hypertension approaches be proposed in symptomatic patients with a suspicion of pulmonary hypertension?

Based on the new definition of invasively assessed PH, the estimation of echocardiographic probability should account for increasing sensitivity for detecting mPAP >20 mmHg, to avoid missing cases of evident PH. Nevertheless, the new definition of PH will increase the overlap between healthy subjects and those with suspected PH, which may represent up to 25% of the subjects indicated for echocardiography in the general population.<sup>110</sup> Thus, high specificity and positive predictive value (PPV) are crucial to avoid unnecessary RHC in individuals without PH.

Of note, the association of tricuspid regurgitation (TR) pressure gradient (TRPG) with invasively measured systolic pulmonary arterial pressure (sPAP) is limited at low pressure gradients (TRPG ≤46 mmHg).<sup>111</sup> For this reason, lowering the estimated TRPG cut-off <31 mmHg (TR velocity <2.8 m/s) to screen for the new PH definition results in very low specificity, with unacceptable PPV and moderate accuracy without a substantial increase in sensitivity.<sup>112</sup> Available data do not support the current recommendation on the TRPG threshold for the echocardiographic probability of PH to be changed. A recent study by D'Alto and colleagues validates previous guidelines' strategy as applied for predicting PH or PVD, taking into account the updated haemodynamic definitions of PH.<sup>113</sup>

In this setting, other echocardiographic signs of PH—such as right ventricle (RV)/left ventricle (LV) basal diameter (area) ratio >1.0, flattening of the interventricular septum (LV eccentricity index [LVEI] >1.1), RV outflow tract Doppler acceleration time (RVOT AT) <105 ms and/or mid-systolic notching, early diastolic pulmonary regurgitation velocity >2.2 m/s, inferior vena cava diameter >21 mm with decreased inspiratory collapse, and right atrial (RA) area at end-systole >18 cm<sup>2</sup>—significantly increase specificity and overall accuracy for screening of the new definition of PH. Among indirect echocardiographic signs of PH, a pulmonary artery (PA) to aortic root ratio >1 is able to increase accuracy compared with a PA diameter >25 mm (in the absence of aortic or PA pathology). Although normal values for PA diameter are reported to be 18 ± 3 mm (range 9–29 mm),<sup>114</sup> values <29 mm have been observed in up to 25% of patients with PAH or chronic thrombo-embolic PH (CTEPH),<sup>115</sup> while a PA to aortic root ratio >1 is extremely uncommon in healthy subjects (0.008%).<sup>116</sup> Nevertheless, a cut-off for a PA diameter >25 mm has recently been validated.<sup>113</sup>

The tricuspid annular plane systolic excursion (TAPSE)/sPAP ratio, which represents a non-invasive measure of RV–PA coupling, provides additional information for the diagnosis of PH and risk assessment in PAH. A cut-off value of <0.55 mm/mmHg is considered as one measure contributing to the probability of PH (taking into account the updated definition).<sup>117</sup> In patients with PAH, a cut-off of >0.32 mm/mmHg may indicate a low-risk status, whereas a cut-off of <0.19 mm/mmHg may indicate a high mortality risk.<sup>118,119</sup>

Additionally, the TRPG/RVOT AT ratio and the TAPSE/TRPG ratio recently emerged with high discriminatory power when screening for pre-capillary PH (cut-off values 0.37 mmHg/ms and 0.56 mm/mmHg, respectively), providing the highest specificity and accuracy, especially in patients with an mPAP 20–25 mmHg (cut-off values 0.61 mmHg/ms and 0.36 mm/mmHg, respectively).<sup>112</sup> Nevertheless, the overall accuracy of the TRPG/RVOT AT ratio and the TAPSE/TRPG ratio remains suboptimal when screening for pre-capillary PH in patients with low TRPG, even though they were improved and externally validated compared with TRPG alone.

Therefore, the echocardiographic probability of PH should be interpreted in a clinical context, taking into account symptoms and risk factors or associated conditions of PAH and CTEPH. Symptomatic patients with risk factors or associated conditions of PAH and an intermediate echocardiographic probability of PH should be considered for further investigation with cardiopulmonary exercise testing (CPET), to improve the accuracy of the diagnostic algorithm in keeping with the new definition of PH. In this context, the sequential combination of a ventilatory equivalent for carbon dioxide (VE/VCO<sub>2</sub>) slope ≥36 in DETECT-positive patients with SSc enabled an increase in the specificity and PPV, reducing the number of unnecessary invasive procedures, without a loss in sensitivity and negative predictive value (NPV; missed diagnoses) in accordance with the new haemodynamic definition.<sup>120</sup> When used in a less sensitive tuned work-up of SSc-associated PAH, end-tidal partial pressure of carbon dioxide (PETCO<sub>2</sub>) and VE/VCO<sub>2</sub> values, respectively, peak <31.3 mmHg and nadir >35.5, increased specificity and maintained a high NPV for PAH diagnosis.<sup>121</sup> More evidence is required to define the optimal cut-off value to show if accuracy is retained when the new haemodynamic definition is applied.

Larger-scale prospective studies are required to investigate whether CPET would be indicated in symptomatic patients without risk factors or associated conditions for PAH/CTEPH and intermediate echocardiographic probability of PH.

See the following sections for search strategy (13.6), PRISMA diagram (14.6), and Evidence to Decision table (16.5).

### 5.2. Key narrative question #3: Should screening be offered to guide detection of pulmonary arterial hypertension in systemic sclerosis?

See the following sections for search strategy (13.7), PRISMA diagram (14.7), and Evidence to Decision table (16.6).



## 6. Pulmonary arterial hypertension (group 1)

**Table S2** Imaging-derived variables of prognostic relevance and cut-off values in pulmonary arterial hypertension

|                                              | Increased risk | Decreased risk | Ref.                |
|----------------------------------------------|----------------|----------------|---------------------|
| <b>Echocardiography</b>                      |                |                |                     |
| <b>Right heart morphology</b>                |                |                |                     |
| RVESRI                                       | ≥1.6           | NA             | 122                 |
| Δ RVEDA, cm <sup>2</sup>                     | NA             | <−2.45         | 123                 |
| RV/LV ratio                                  | >1             | NA             | NA                  |
| Δ RA area, cm <sup>2</sup>                   | NA             | <−1.30         | 123                 |
| Δ LVEIs                                      | NA             | <−0.12         | 123                 |
| Tricuspid regurgitation, severe              | Yes            | NA             | 124                 |
| <b>RV systolic function</b>                  |                |                |                     |
| TAPSE, mm                                    | ≤17            | NA             | 125                 |
| TAPSE/sPAP, mm/mmHg                          | <0.19          | >0.55          | 118                 |
| RV-FAC, %                                    | <36.5          | NA             | 126                 |
| IVCv, cm/s                                   | ≤9             | NA             | 127                 |
| <b>RV filling pressure</b>                   |                |                |                     |
| Pericardial effusion                         | Yes            | NA             | 128,129             |
| RV post-systolic strain pattern <sup>a</sup> | 2–3            | NA             | 130                 |
| <b>RV dyssynchrony<sup>b</sup></b>           |                |                |                     |
| RV-SD4, ms                                   | >23            | ≤18            | 131                 |
| <b>Cardiac magnetic resonance</b>            |                |                |                     |
| <b>Heart morphology</b>                      |                |                |                     |
| RVEDVI, mL/m <sup>2</sup>                    | >84            | NA             | 132                 |
| RVESVI, % pred.                              | >180<br>>227   | NA             | 133,134             |
| RV M/V ratio, g/mL                           | ≤0.45          | NA             | 135                 |
| LVEDVI, mL/m <sup>2</sup>                    | ≤40            | >58            | 132,134             |
| <b>RV function and coupling</b>              |                |                |                     |
| SVI, mL/m <sup>2</sup>                       | ≤25            | NA             | 132                 |
| RVEF, % <sup>c</sup>                         | <37            | >54            | 132–134,<br>136–138 |
| Δ RVEF                                       | NA             | >0             | 137,138             |
| RV SV/ESV                                    | ≤0.53          | NA             | 136                 |

IVCv, isovolumic contraction peak velocity at the tricuspid annulus; LV, left ventricular; LVEDVI, LV end-diastolic volume index; LVEIs, LV systolic eccentricity index; RV, right ventricular; RVEDA, RV end-diastolic area; RVEDVI, RV end-diastolic volume index; RVEF, RV ejection fraction; RVESRI, RV end-systolic remodelling index; RV-FAC, RV fractional area change; RV/LV ratio, RV end-diastolic diameter to LV end-diastolic diameter ratio (measured in the four-chamber apical view); RV-SD4, standard deviation of the times to peak-systolic strain for the four mid-basal RV segments; RV SV/ESV, RV stroke volume/end-systolic volume; sPAP, systolic pulmonary arterial pressure; SVI, stroke volume index; TAPSE, tricuspid annular plane systolic excursion.

Δ change in parameter from baseline to 1 year.

<sup>a</sup>RV post-systolic strain pattern: for RV post-systolic patterns, longitudinal strain was considered and the time period from peak-systolic strain to return to baseline point-set for the basal RV free-wall segment was evaluated.

<sup>b</sup>Defined as the standard deviation of the mean value of times to peak-systolic strain for the four mid-basal RV segments.

<sup>c</sup>RVEF-derived cut-offs: increased risk different cut-off values were identified; all were <37%.

### 6.1. Key narrative question #4: Should a risk-stratification strategy be used to guide treatment in patients with pulmonary arterial hypertension?

Chosen risk-stratification instruments were French invasive, French non-invasive, Swedish Pulmonary Arterial Hypertension Registry (SPAHR)/Comparative, Prospective Registry of Newly Initiated Therapies for Pulmonary Hypertension (COMPERA), and Registry to Evaluate Early and Long-Term PAH Disease Management (REVEAL) 2.0 score.

The ESC/ERS risk-stratification tool has been validated in a series of retrospective studies at diagnosis, and early and long-term follow-up.<sup>139–143</sup> Accumulating evidence reinforces that changes in risk scores, evaluated by the SPAHR equation/COMPERA, French Pulmonary Hypertension Registry (FPHR), and REVEAL strategies, are influenced by treatment and predict survival and clinical worsening.<sup>139,140,143–146</sup> This supports a goal-orientated treatment approach in PAH, where achieving and/or maintaining a low-risk status is favourable and recommended.<sup>144,147–150</sup>

Evidence based on retrospective analyses furthermore displays an intimate association between the use of PAH therapies and improvement in risk score,<sup>147,149–152</sup> supporting a recommendation that risk stratification should be used to guide treatment in patients with PAH. The ESC/ERS 2022 risk assessment and prognostic evaluation model is expanded, being based on ‘clinical observations’, ‘modifiable’ variables, and ‘patient characteristics’, aimed at identifying patients with PAH early in the low-risk zone or those who could be transferred to a low-risk status with treatment. Large, prospective, collaborative studies are encouraged to further improve the ability of risk stratification to guide treatment in patients with PAH, with specific focus on substratifying the large intermediate-risk group, and its use in the elderly or in those with comorbidities. Although determining the superiority and feasibility of the various risk-stratification strategies remains an important task in the future, the major challenge at present is to implement a thorough, multiparametric, risk-stratification approach at all expert PH centres, for PAH patients with different phenotypes, demographics, and comorbidities, as a part of the clinical practice, which is strongly recommended.

See the following sections for search strategy (13.8), PRISMA diagram (14.8), and Evidence to Decision table (16.7).

### 6.2. PICO question I: Should initial oral double-combination therapy vs. monotherapy be used in symptomatic patients with pulmonary arterial hypertension?

Chosen oral double-combination therapies are endothelin receptor antagonists (ERAs) and phosphodiesterase 5 inhibitors (PDE5is), and monotherapy are ERAs or PDE5is.

See the following sections for search strategy (13.1), PRISMA diagram (14.1), GDT evidence profile (15.1), and Evidence to Decision table (16.1).

### 6.2.1. Conclusions

The available data support a positive recommendation, despite the low certainty of evidence (a single RCT, small number of events). The primary endpoint of time to death or morbidity event is met (driven by the reduction in hospitalizations). Secondary efficacy endpoints, such as change in exercise capacity (6-minute walking distance [6MWD]) and in cardiac biomarkers (N-terminal pro-brain natriuretic peptide [NT-proBNP]), also favour initial combination therapy. The

lack of haemodynamic evaluation is a weakness. There is no safety concern. Finally, the long-term effect on survival is uncertain.

#### 6.2.1.1. Recommendations

For symptomatic patients with PAH, initiating oral double-combination therapy (ERA and PDE5i) rather than monotherapy (conditional recommendation for the intervention, very low-quality evidence) is suggested.

**Table S3 Recommendations for efficacy of drug monotherapy for pulmonary arterial hypertension**

| Recommendations                 |              | Class <sup>a</sup> | Level <sup>b</sup> | Ref         |               |
|---------------------------------|--------------|--------------------|--------------------|-------------|---------------|
| Endothelin receptor antagonists | Ambrisentan  | I                  | A                  | 101,153,154 |               |
|                                 | Bosentan     | I                  | A                  | 96,155,156  |               |
|                                 | Macitentan   | I                  | B                  | 105,157,158 |               |
| Phosphodiesterase 5 inhibitors  | Sildenafil   | I                  | A                  | 100,159,160 |               |
|                                 | Tadalafil    | I                  | B                  | 102,161     |               |
| Guanylate cyclase stimulators   | Riociguat    | I                  | B                  | 106,162     |               |
| Prostacyclin analogues          | Epoprostenol | Intravenous        | I                  | A           | 94,95,163–166 |
|                                 | Iloprost     | Inhaled            | I                  | B           | 97,167        |
|                                 |              | Intravenous        | IIa                | C           | 168–170       |
|                                 | Treprostinil | Subcutaneous       | I                  | B           | 98,171–173    |
|                                 |              | Inhaled            | IIb                | C           | 174           |
|                                 |              | Intravenous        | IIa                | C           | 175–177       |
|                                 | Beraprost    | Oral               | IIb                | B           | 178           |
| Oral                            |              | IIb                | B                  | 179,180     |               |
| Prostacyclin receptor agonists  | Selexipag    | Oral               | I                  | B           | 109           |

© ESC/ERS 2022

<sup>a</sup>Class of recommendation.

<sup>b</sup>Level of evidence.

**Table S4 Potentially significant drug interactions with pulmonary arterial hypertension-targeted therapies**

| PAH drug                           | Mechanism of interaction                    | Interacting drug             | Interaction                                                                                                                                 |
|------------------------------------|---------------------------------------------|------------------------------|---------------------------------------------------------------------------------------------------------------------------------------------|
| <b>Ambrisentan</b>                 | CYP3A4 induction                            | Cyclosporine<br>Ketoconazole | Caution is required when co-administering ambrisentan with ketoconazole and cyclosporine                                                    |
|                                    | CYP3A4 induction                            | Hormonal contraceptives      | Ambrisentan slightly decreases the AUC of hormonal contraceptives; not clinically significant                                               |
| <b>Bosentan</b> <sup>181,182</sup> | CYP3A4 inducer                              | Sildenafil <sup>183</sup>    | Sildenafil levels fall 50%; bosentan levels increase 50%. May not require dose adjustments of either drug                                   |
|                                    | CYP3A4 substrate                            | Cyclosporine                 | Cyclosporine levels fall 50%; bosentan levels increase four-fold. Combination contraindicated                                               |
|                                    | CYP3A4 substrate                            | Erythromycin                 | Bosentan levels increase. May not require dose adjustment of bosentan during a short course                                                 |
|                                    | CYP3A4 substrate                            | Ketoconazole                 | Bosentan levels increase two-fold                                                                                                           |
|                                    | CYP3A4 substrate + bile salt pump inhibitor | Glibenclamide                | Increased incidence of elevated aminotransferases. Potential decrease of hypoglycaemic effect of glibenclamide. Combination contraindicated |
|                                    | CYP2C9 and CYP3A4 substrate                 | Fluconazole, amiodarone      | Bosentan levels considerably increase. Combination contraindicated                                                                          |
|                                    | CYP2C9 and CYP3A4 inducers                  | Rifampicin, phenytoin        | Bosentan levels decrease 58%. Need for dose adjustment uncertain                                                                            |

Continued

|                                  |                            |                                                      |                                                                                                                                                                               |
|----------------------------------|----------------------------|------------------------------------------------------|-------------------------------------------------------------------------------------------------------------------------------------------------------------------------------|
|                                  | CYP2C9 inducer             | HMG CoA reductase inhibitors                         | Simvastatin levels reduce 50%; similar effects likely with atorvastatin. Cholesterol level should be monitored                                                                |
|                                  | CYP2C9 inducer             | Warfarin                                             | Warfarin metabolism increases; may need to adjust warfarin dose. Intensified monitoring of warfarin recommended following initiation, but dose adjustment usually unnecessary |
|                                  | CYP2C9 and CYP3A4 inducers | Hormonal contraceptives                              | Hormone levels decrease. Contraception unreliable                                                                                                                             |
| <b>Macitentan</b> <sup>184</sup> | CYP3A4 substrate           | Rifampicin                                           | Rifampicin decreases macitentan levels 79%. Need for dose adjustment uncertain                                                                                                |
| <b>Selexipag</b> <sup>185</sup>  | CYP2C8 substrate           | Gemfibrozil                                          | Combination should be avoided as this could lead to high levels of selexipag                                                                                                  |
|                                  | CYP2C8 Substrate           | Clopidogrel <sup>186</sup>                           | Increased levels of selexipag. It is recommended reducing selexipag dosing to half                                                                                            |
| <b>Sildenafil</b> <sup>187</sup> | CYP3A4 substrate           | Bosentan                                             | Sildenafil levels fall 50%; bosentan levels increase 50%. May not require dose adjustments of either drug                                                                     |
|                                  | CYP3A4 substrate           | HMG CoA reductase inhibitors                         | May increase simvastatin/atorvastatin levels through competition for metabolism. Sildenafil levels may increase. Possible increased risk of rhabdomyolysis                    |
|                                  | CYP3A4 substrate           | HIV protease inhibitors                              | Ritonavir and saquinavir markedly increase sildenafil levels. Co-administration is not recommended                                                                            |
|                                  | CYP3A4 inducer             | Phenytoin                                            | Sildenafil levels may fall                                                                                                                                                    |
|                                  | CYP3A4 substrate           | Erythromycin                                         | Sildenafil levels increase. May not require dose adjustment for a short course                                                                                                |
|                                  | CYP3A4 substrate           | Ketoconazole                                         | Sildenafil levels increase. May not require dose adjustment                                                                                                                   |
|                                  | CYP3A4 substrate           | Cimetidine                                           | Sildenafil levels increase. May not require dose adjustment                                                                                                                   |
|                                  | cGMP                       | Nitrates<br>Nicorandil<br>Molsidomine <sup>188</sup> | Profound systemic hypotension. Combination contraindicated                                                                                                                    |
| <b>Tadalafil</b>                 | CYP3A4 substrate           | Bosentan <sup>189</sup>                              | Tadalafil exposure decreases 42%, no significant changes in bosentan levels. May not require dose adjustment                                                                  |
|                                  | cGMP                       | Nitrates<br>Nicorandil<br>Molsidomine                | Profound systemic hypotension. Combination contraindicated                                                                                                                    |
| <b>Riociguat</b> <sup>190</sup>  | cGMP                       | Sildenafil<br>Tadalafil                              | Hypotension, severe side effects. Combination contraindicated                                                                                                                 |
|                                  | cGMP                       | Nitrates<br>Nicorandil<br>Molsidomine                | Profound systemic hypotension. Combination contraindicated                                                                                                                    |

AUC, area under the curve; cGMP, cyclic guanosine monophosphate; CYP, cytochrome P450; HIV, human immunodeficiency virus; HMG CoA, 3-hydroxy-3-methylglutaryl coenzyme A; PAH, pulmonary arterial hypertension.

Adapted from the Consensus statement on the management of pulmonary hypertension in clinical practice in the UK and Ireland, 2008.<sup>191</sup>

## 7. Specific pulmonary arterial hypertension subsets

### 7.1. General classification of paediatric pulmonary hypertension (from 6th World Symposium on Pulmonary Hypertension)

**Table S5** Persistent pulmonary hypertension of the newborn and associated disorders

|                                     |                                                                                                                                                                          |
|-------------------------------------|--------------------------------------------------------------------------------------------------------------------------------------------------------------------------|
| Idiopathic PPHN                     | Myocardial dysfunction (asphyxia, infection)                                                                                                                             |
| Down syndrome                       | Structural cardiac diseases                                                                                                                                              |
| Meconium aspiration syndrome        | Hepatic and cerebral arteriovenous malformations                                                                                                                         |
| Respiratory distress syndrome       | NA                                                                                                                                                                       |
| Transient tachypnoea of the newborn | Associations with other diseases:<br>Placental dysfunction (pre-eclampsia, chorioamnionitis, maternal hypertension)<br>Metabolic disease<br>Maternal drug use or smoking |
| Pneumonia/sepsis                    |                                                                                                                                                                          |
| Developmental lung disease          |                                                                                                                                                                          |
| Perinatal stress                    |                                                                                                                                                                          |

Reproduced with permission of the © ERS 2022: European Respiratory Journal 53 (1) 1801916; DOI: 10.1183/13993003.01916-2018 Published 24 January 2019.<sup>202</sup>

**Table S6** Congenital post-capillary obstructive lesions

|                                                             |
|-------------------------------------------------------------|
| <b>Pulmonary vein stenosis</b>                              |
| Isolated                                                    |
| Associated (bronchopulmonary dysplasia, prematurity)        |
| <b>Cor triatriatum</b>                                      |
| <b>Obstructed total anomalous pulmonary venous return</b>   |
| <b>Mitral/aortic stenosis (including supra/subvalvular)</b> |
| <b>Coarctation of the aorta</b>                             |

Reproduced with permission of the © ERS 2022: European Respiratory Journal 53 (1) 1801916; DOI: 10.1183/13993003.01916-2018 Published 24 January 2019.<sup>202</sup>

**Table S7** Developmental lung disorders associated with pulmonary hypertension

|                                                                           |
|---------------------------------------------------------------------------|
| <b>Bronchopulmonary dysplasia</b>                                         |
| <b>Congenital diaphragmatic hernia</b>                                    |
| <b>Down syndrome</b>                                                      |
| <b>Alveolar capillary dysplasia with “misalignment of veins”* (FOXF1)</b> |
| <b>Lung hypoplasia, acinar dysplasia</b>                                  |
| <b>Surfactant protein abnormalities</b>                                   |
| Surfactant protein B deficiency                                           |
| Surfactant protein C deficiency                                           |
| ABCA3                                                                     |
| <b>TTF1/NKX2-1</b>                                                        |
| <b>TBX4</b>                                                               |
| <b>Pulmonary interstitial glycogenesis</b>                                |
| <b>Pulmonary alveolar proteinosis</b>                                     |
| <b>Pulmonary lymphangiectasia</b>                                         |

Table S7 provides a summary of developmental lung disorders that share the common feature of developmental vascular disturbance  
Reproduced with permission of the © ERS 2022: European Respiratory Journal 53 (1) 1801916; DOI: 10.1183/13993003.01916-2018 Published 24 January 2019.<sup>202</sup>

**Table S8** Complex congenital heart disease

|                                                                                                |
|------------------------------------------------------------------------------------------------|
| <b>Segmental pulmonary hypertension</b>                                                        |
| Isolated pulmonary artery of ductal origin                                                     |
| Absent pulmonary artery                                                                        |
| Pulmonary atresia with ventricular septal defect and major aorto-pulmonary collateral arteries |
| Hemitruncus                                                                                    |
| Other                                                                                          |
| <b>Single ventricle</b>                                                                        |
| Unoperated                                                                                     |
| Operated                                                                                       |
| <b>Scimitar syndrome</b>                                                                       |

Reproduced with permission of the © ERS 2022: European Respiratory Journal 53 (1) 1801916; DOI: 10.1183/13993003.01916-2018 Published 24 January 2019.<sup>202</sup>

## 8. Pulmonary hypertension associated with left heart disease (group 2)

### 8.1. Pathophysiology of pulmonary hypertension and right ventricular dysfunction in group 2 pulmonary hypertension

The pathophysiology of group 2 PH combines several mechanisms (*Figure S1*): (1) an initial passive increase in LV filling pressures; (2)

PA endothelial dysfunction (including vasoconstriction), an early mechanism already observed in cardiac diseases; (3) vascular remodelling, with the development of PVD in some cases; and (4) RV dysfunction and altered RV–PA coupling.

Right ventricular dysfunction is frequent and associated with a worse prognosis in patients with PH-associated with left heart disease (LHD). Afterload-mediated processes account for RV dysfunction in most cases, with RV–PA uncoupling as a marker of disease.<sup>192,193</sup> However, some cardiac diseases (especially heart failure with preserved ejection fraction [HFpEF]) may lead to a distinct

feature of RV dysfunction in the absence of PH through various mechanisms, such as reduced pulmonary artery compliance (PAC),<sup>193,194</sup> intrinsic myocardial disease,<sup>195,196</sup> and TR.<sup>193,197–199</sup> In group 2 PH, an elevated PAWP reduces PAC,<sup>193,200,201</sup> which partly explains why a low PAC is associated with a worse outcome. Finally, PAC-mediated RV dysfunction has been shown in patients with heart failure with normal pulmonary arterial pressure (PAP) and PVR.<sup>194</sup>

Description of the haemodynamic mechanisms leading to PH in HFpEF. Elevation of LAP triggers development of PH and leads to:

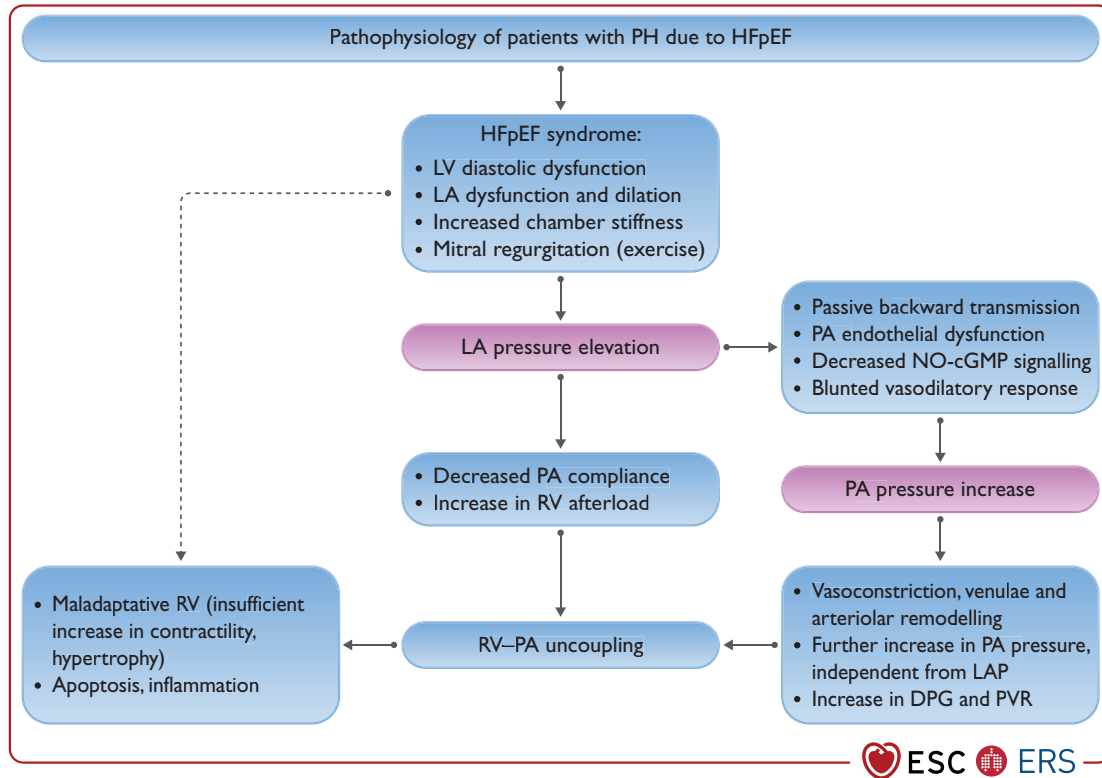

**Figure S1** Pathophysiology of pulmonary hypertension due to heart failure with preserved ejection fraction DPG, diastolic pressure gradient; HFpEF, heart failure with preserved ejection fraction; LA, left atrial; LAP, left atrial pressure; LV, left ventricular; NO-cGMP, nitric oxide–cyclic guanosine monophosphate; PA, pulmonary artery; PH, pulmonary hypertension; PVR, pulmonary vascular resistance; RV, right ventricle.

(1) a passive increase in PA pressure; and (2) a decrease in PAC generating a pulsatile increase in RV afterload that is independent from the increase in PA pressure. Right ventricular uncoupling results from a combination of the latter and pulmonary vascular response to the

increase in pressure. Endothelial dysfunction may be present before the increase in LAP. A maladaptive RV is common in HFpEF, either in response to an increase in afterload and/or due to direct myocardial insult, leading to RV failure.

## 8.2. Diagnosis

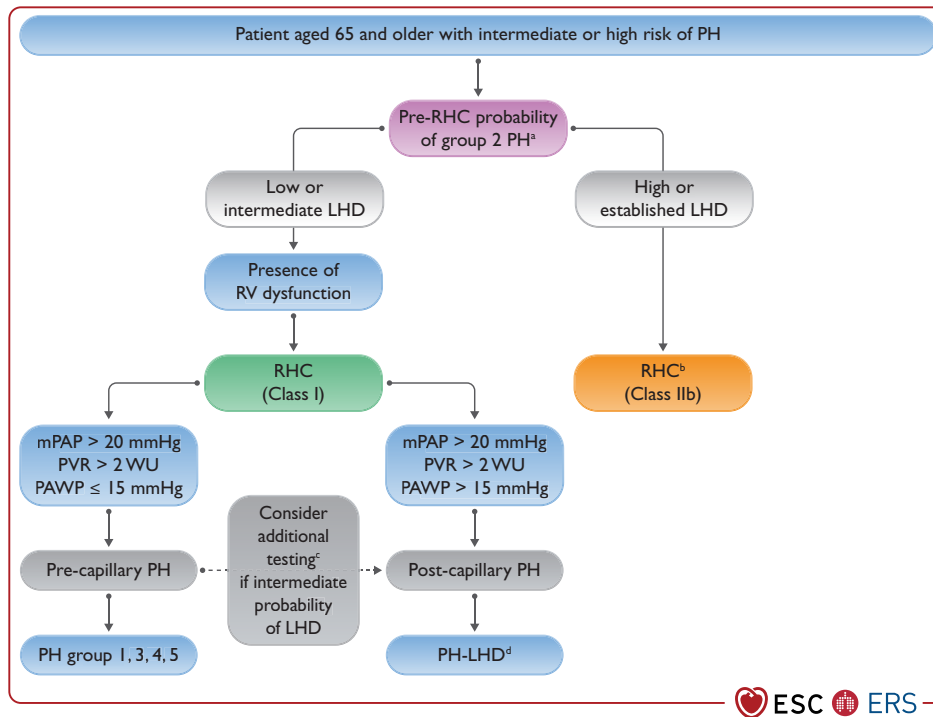

ESC ERS

**Figure S2** Indications and interpretation of haemodynamic assessment in pulmonary hypertension associated with left heart disease HFpEF, heart failure with preserved ejection fraction; LHD, left heart disease; LVEDP, left ventricular end-diastolic pressure; mPAP, mean pulmonary artery pressure; PAWP, pulmonary arterial wedge pressure; PH, pulmonary hypertension; PVR, pulmonary vascular resistance; RHC, right heart catheterization; RV, right ventricle; WU, Wood units.

<sup>a</sup>According to probability of LHD as cause of PH (Table 24).

<sup>b</sup>RHC may be considered and indicated for prognosis or specific treatment decision purposes, according to the appropriate guidelines.

<sup>c</sup>LVEDP measurement may be indicated if PAWP traces are uninterpretable. Fluid loading test may uncover HFpEF as the cause of PH. Exercise testing may also be considered in experienced centres.

<sup>d</sup>RHC data must be interpreted in the clinical context.

### 8.3. Key narrative question #5: Should drugs approved for pulmonary arterial hypertension be used in patients with pulmonary hypertension associated with left heart disease?

Chosen drugs are ERAs, PDE5is, guanylate cyclase stimulators, prostacyclin derivatives, and prostacyclin receptor agonists.

See the following sections for search strategy (13.9), PRISMA diagram (14.9), and Evidence to Decision table (16.8).

### 8.4. PICO question II: Should phosphodiesterase type 5 inhibitors be

### used in patients with combined post- and pre-capillary pulmonary hypertension due to heart failure with preserved ejection fraction?

See the following sections for search strategy (13.2), PRISMA diagram (14.2), GDT evidence profile (15.2), and Evidence to Decision table (16.2).

#### 8.4.1. Conclusions

##### 8.4.1.1. Recommendations

The use of a PDE5i in patients with combined post- and pre-capillary PH due to HFpEF is currently not recommended.

## 9. Pulmonary hypertension associated with lung diseases and/or hypoxia (group 3)

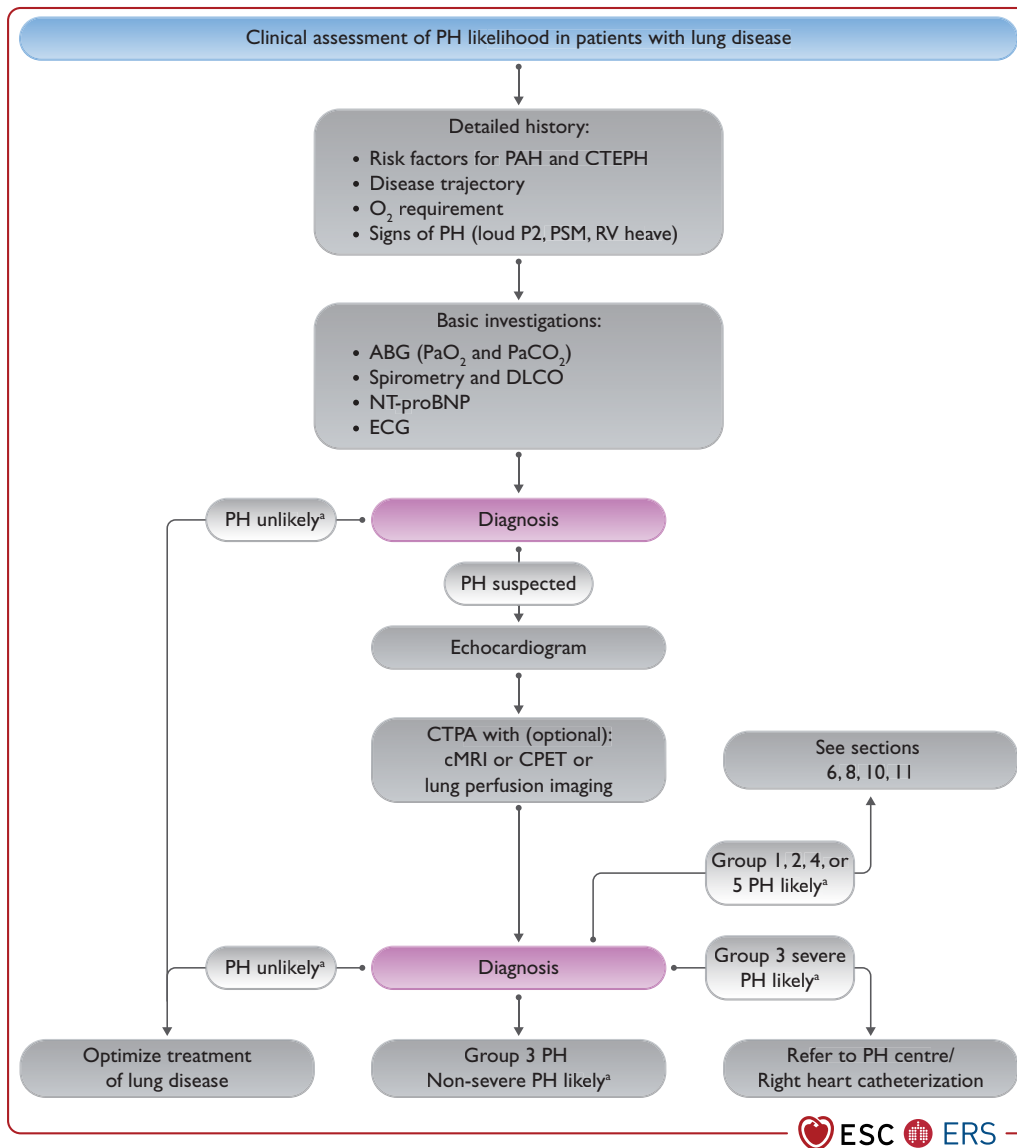

**Figure S3** Approach to assessment of suspected pulmonary hypertension in patients with lung disease ABG, arterial blood gas analysis; cMRI, cardiac magnetic resonance imaging; CPET, cardiopulmonary exercise testing; CTEPH, chronic thrombo-embolic pulmonary hypertension; CTPA, computed tomography pulmonary angiography; DLCO, lung diffusion capacity for carbon monoxide; ECG, electrocardiogram; NT-proBNP, N-terminal pro-brain natriuretic peptide; O<sub>2</sub>, oxygen; P2, second heart sound; PAH, pulmonary arterial hypertension; PaCO<sub>2</sub>, partial pressure of arterial carbon dioxide; PH, pulmonary hypertension; PaO<sub>2</sub>, partial pressure of arterial oxygen; PSM, pan systolic murmur; RV, right ventricular.

<sup>a</sup>Investigations to be integrated with clinical context in a stepwise fashion to assess for the probability and aetiology of PH.

### 9.1. Key narrative question #6: Should drugs approved for pulmonary arterial hypertension be used in patients with pulmonary hypertension due to chronic obstructive pulmonary disease?

Chosen drugs are ERAs, PDE5is, guanylate cyclase stimulators, prostacyclin derivatives, and prostacyclin receptor agonists.

See the following sections for search strategy (13.10), PRISMA diagram (14.10), and Evidence to Decision table (16).

### 9.2. Key narrative question #7: Should drugs approved for pulmonary arterial hypertension be used in patients with pulmonary hypertension due to interstitial lung diseases?

Chosen drugs are ERAs, guanylate cyclase stimulators, prostacyclin derivatives, and prostacyclin receptor agonists.

See the following sections for search strategy (13.11), PRISMA diagram (14.11), and Evidence to Decision table (16.10).

### 9.3. PICO question III: Should phosphodiesterase 5 inhibitors be used in patients with severe pulmonary hypertension due to interstitial lung diseases?

See the following sections for search strategy (13.3), PRISMA diagram (14.3), GDT evidence profile (15.3), and Evidence to Decision table (16.3).

#### 9.3.1. Conclusions

##### 9.3.1.1. Recommendations

The use of PDE5is in patients with ILD and non-severe PH is currently not recommended. For patients with ILD and severe PH, individual decision-making is recommended.

## 10. Chronic thrombo-embolic pulmonary hypertension (group 4)

### 10.1. Key narrative question #8: Should balloon pulmonary angioplasty or medical therapy be used in patients with inoperable chronic thrombo-embolic pulmonary hypertension?

See the following sections for search strategy (13.12), PRISMA diagram (14.12), and Evidence to Decision table (16.11).

### 10.2. PICO question IV: Should patients with chronic thrombo-embolic pulmonary hypertension who are considered inoperable but candidates for balloon pulmonary angioplasty receive medical therapy before interventional therapy is initiated?

See the following sections for search strategy (13.4), PRISMA diagram (14.4), GDT evidence profile (15.4), and Evidence to Decision table (16.4).

#### 10.2.1. Conclusions

##### 10.2.1.1. Recommendations

In patients with CTEPH who are candidates for balloon pulmonary angioplasty (BPA), medical therapy should be considered prior to the intervention (conditional recommendation, very low quality of evidence).

## 11. Pulmonary hypertension with unclear and/or multifactorial mechanisms (group 5)

No supplementary data for this section.

## 12. Definition of a pulmonary hypertension centre

No supplementary data for this section.

## 13. Search strategies

### 13.1. Literature search strategies for PICO I

#### 13.1.1. Pubmed

Search date: 12 April 2021

| Set # | Search strategy                                                                                                                                                                                                                                                                                                                                                                                                                                                                  | Results |
|-------|----------------------------------------------------------------------------------------------------------------------------------------------------------------------------------------------------------------------------------------------------------------------------------------------------------------------------------------------------------------------------------------------------------------------------------------------------------------------------------|---------|
| 1     | "Hypertension, Pulmonary"[Mesh]                                                                                                                                                                                                                                                                                                                                                                                                                                                  | 37 397  |
| 2     | pulmonary[tiab] AND arter*[tiab] AND hypertensi*[tiab]                                                                                                                                                                                                                                                                                                                                                                                                                           | 32 835  |
| 3     | 1 OR 2                                                                                                                                                                                                                                                                                                                                                                                                                                                                           | 51 442  |
| 4     | "Combined Modality Therapy"[Mesh]                                                                                                                                                                                                                                                                                                                                                                                                                                                | 271 289 |
| 5     | "combination therapy"[tiab] OR "combined modality therapy"[tiab]                                                                                                                                                                                                                                                                                                                                                                                                                 | 51 186  |
| 6     | 4 OR 5                                                                                                                                                                                                                                                                                                                                                                                                                                                                           | 316 229 |
| 7     | "Bosentan"[Mesh] OR "Endothelin Receptor Antagonists"[Mesh]                                                                                                                                                                                                                                                                                                                                                                                                                      | 5802    |
| 8     | "Endothelin Receptor Antagonists"[Pharmacological Action]                                                                                                                                                                                                                                                                                                                                                                                                                        | 5901    |
| 9     | "ambrisentan"[Supplementary Concept] OR "macitentan"[Supplementary Concept] OR "sitaxsentan"[Supplementary Concept]                                                                                                                                                                                                                                                                                                                                                              | 553     |
| 10    | ACT064992[tiab] OR Actelion[tiab] OR Ambrisentan[tiab] OR Bosentan[tiab] OR BSF208075[tiab] OR "endothelin receptor antagonists"[tiab] OR GSK1325760A[tiab] OR Letairis[tiab] OR LU208075[tiab] OR macitentan[tiab] OR opsumit[tiab] OR Pulmonext[tiab] OR "Ro 470203"[tiab] OR Sitaxentan[tiab] OR Stayveer[tiab] OR Tracleer[tiab] OR Volibris[tiab]                                                                                                                           | 128     |
| 11    | OR/7-10                                                                                                                                                                                                                                                                                                                                                                                                                                                                          | 6519    |
| 12    | "Phosphodiesterase 5 Inhibitors"[Mesh] OR "Sildenafil Citrate"[Mesh] OR "Tadalafil"[Mesh] OR "Vardenafil Dihydrochloride"[Mesh]                                                                                                                                                                                                                                                                                                                                                  | 8411    |
| 13    | "Phosphodiesterase 5 Inhibitors" [Pharmacological Action]                                                                                                                                                                                                                                                                                                                                                                                                                        | 8485    |
| 14    | Adcirca[tiab] OR BAY38-9456[tiab] OR Cialis[tiab] OR Desmethylsildenafil[tiab] OR "EC 607-088-5"[tiab] OR GF-196960[tiab] OR Homosildenafil[tiab] OR Hydroxyhomosildenafil[tiab] OR IC351[tiab] OR Levitra[tiab] OR "PDE5I"[tiab] OR "PDE5 inhibitors"[tiab] OR "phosphodiesterase type 5 inhibitors"[tiab] OR Revatio[tiab] OR Sildenafil[tiab] OR Staxyn[tiab] OR Tadalafil[tiab] OR "UK 9248010"[tiab] OR Vardenafil[tiab] OR Viagra[tiab] OR Vivanza[tiab] OR Vizarsin[tiab] | 10 426  |
| 15    | OR/12-14                                                                                                                                                                                                                                                                                                                                                                                                                                                                         | 12 060  |
| 16    | 6 AND 11 AND 15                                                                                                                                                                                                                                                                                                                                                                                                                                                                  | 142     |

Continued



|    |                                    |        |
|----|------------------------------------|--------|
| 17 | monotherapy[tiab]                  | 52 184 |
| 18 | 11 OR 15                           | 18 015 |
| 19 | 17 AND 18                          | 369    |
| 20 | 3 AND 16 AND 19                    | 46     |
| 21 | "Animals"[Mesh] NOT "Humans"[Mesh] | NA     |
| 22 | 20 NOT 21                          | 45     |
| 23 | English[lang]                      | NA     |
| 24 | 22 AND 23                          | 39     |
| 25 | 1990/1/1:3000/12/31[pdat]          | NA     |
| 26 | 24 AND 25                          | 39     |

© ESC/ERS 2022

### 13.1.2. Cochrane

Search date: 12 April 2021

| Set # | Search strategy                                                                                                                                                                                                                                                                                                                                        | Results |
|-------|--------------------------------------------------------------------------------------------------------------------------------------------------------------------------------------------------------------------------------------------------------------------------------------------------------------------------------------------------------|---------|
| 1     | MeSH descriptor: [Hypertension, Pulmonary] explode all trees                                                                                                                                                                                                                                                                                           | 1194    |
| 2     | pulmonary:ti,ab AND arter*:ti,ab AND hypertensi*:ti,ab                                                                                                                                                                                                                                                                                                 | 2790    |
| 3     | 1 OR 2                                                                                                                                                                                                                                                                                                                                                 | 3204    |
| 4     | MeSH descriptor: [Combined Modality Therapy] explode all trees                                                                                                                                                                                                                                                                                         | 21 995  |
| 5     | "combination therapy":ti,ab OR "combined modality therapy":ti,ab                                                                                                                                                                                                                                                                                       | 13 687  |
| 6     | 4 OR 5                                                                                                                                                                                                                                                                                                                                                 | 35 171  |
| 7     | MeSH descriptor: [Bosentan] explode all trees                                                                                                                                                                                                                                                                                                          | 190     |
| 8     | MeSH descriptor: [Endothelin Receptor Antagonists] explode all trees                                                                                                                                                                                                                                                                                   | 275     |
| 9     | ACT064992:ti,ab OR Actelion:ti,ab OR Ambrisentan:ti,ab OR Bosentan:ti,ab OR BSF208075:ti,ab OR "endothelin receptor antagonists":ti,ab OR GSK1325760A:ti,ab OR Letairis:ti,ab OR LU208075:ti,ab OR macitentan:ti,ab OR opsumit:ti,ab OR Pulmonext:ti,ab OR "Ro 470203":ti,ab OR Sitaxentan:ti,ab OR Stayveer:ti,ab OR Tracleer:ti,ab OR Volibris:ti,ab | 899     |
| 10    | OR/7-9                                                                                                                                                                                                                                                                                                                                                 | 1072    |
| 11    | MeSH descriptor: [Phosphodiesterase 5 Inhibitors] explode all trees                                                                                                                                                                                                                                                                                    | 382     |
| 12    | MeSH descriptor: [Sildenafil Citrate] explode all trees                                                                                                                                                                                                                                                                                                | 962     |
| 13    | MeSH descriptor: [Tadalafil] explode all trees                                                                                                                                                                                                                                                                                                         | 431     |
| 14    | MeSH descriptor: [Vardenafil Dihydrochloride] explode all trees                                                                                                                                                                                                                                                                                        | 174     |
| 15    | Adcirca:ti,ab OR "BAY38-9456":ti,ab OR Cialis:ti,ab OR Desmethylsildenafil:ti,ab OR "EC 607-088-5":ti,ab OR GF-196960:ti,ab OR Homosildenafil:ti,ab OR Hydroxyhomosildenafil:ti,                                                                                                                                                                       | 3296    |

Continued

|    |                                                                                                                                                                                                                                                                                                 |        |
|----|-------------------------------------------------------------------------------------------------------------------------------------------------------------------------------------------------------------------------------------------------------------------------------------------------|--------|
|    | ab OR IC351:ti,ab OR Levitra:ti,ab OR PDE5:ti,ab OR "PDE5 inhibitors":ti,ab OR "phosphodiesterase type 5 inhibitors":ti,ab OR Revatio:ti,ab OR Sildenafil:ti,ab OR Staxyn:ti,ab OR Tadalafil:ti,ab OR "UK 9248010":ti,ab OR Vardenafil:ti,ab OR Viagra:ti,ab OR Vianza:ti,ab OR Vizarsint:ti,ab |        |
| 16 | OR/11-15                                                                                                                                                                                                                                                                                        | 3399   |
| 17 | 6 AND 10 AND 16                                                                                                                                                                                                                                                                                 | 71     |
| 18 | monotherapy:ti,ab                                                                                                                                                                                                                                                                               | 21 803 |
| 19 | 10 OR 16                                                                                                                                                                                                                                                                                        | 4265   |
| 20 | 18 AND 19                                                                                                                                                                                                                                                                                       | 175    |
| 22 | 3 AND 17 AND 20                                                                                                                                                                                                                                                                                 | 41     |

© ESC/ERS 2022

## 13.2. Literature search strategies for PICO II

### 13.2.1. Pubmed

Search date: 12 April 2021

| Set # | Search strategy                                                                                                                                                                                                                                                                                                                                                                                                   | Results   |
|-------|-------------------------------------------------------------------------------------------------------------------------------------------------------------------------------------------------------------------------------------------------------------------------------------------------------------------------------------------------------------------------------------------------------------------|-----------|
| 1     | "Hypertension, Pulmonary"[Mesh]                                                                                                                                                                                                                                                                                                                                                                                   | 37 397    |
| 2     | pulmonary[tiab] AND hypertensi*[tiab]                                                                                                                                                                                                                                                                                                                                                                             | 58 338    |
| 3     | 1 OR 2                                                                                                                                                                                                                                                                                                                                                                                                            | 65 794    |
| 4     | "Phosphodiesterase 5 Inhibitors"[Mesh] OR "Sildenafil Citrate"[Mesh] OR "Tadalafil"[Mesh] OR "Vardenafil Dihydrochloride"[Mesh]                                                                                                                                                                                                                                                                                   | 8411      |
| 5     | "Phosphodiesterase 5 Inhibitors" [Pharmacological Action]                                                                                                                                                                                                                                                                                                                                                         | 8485      |
| 6     | "avanafil"[Supplementary Concept]                                                                                                                                                                                                                                                                                                                                                                                 | 59        |
| 7     | Acetildenafil[tiab] OR Avanafil[tiab] OR Cialis[tiab] OR Desmethylsildenafil[tiab] OR Homosildenafil[tiab] OR Hydroxyhomosildenafil[tiab] OR IC351[tiab] OR Levitra[tiab] OR NCX911[tiab] OR "PDE5I"[tiab] OR "PDE5"[tiab] OR "phosphodiesterase type 5"[tiab] OR Revatio[tiab] OR Sildenafil[tiab] OR Staxyn[tiab] OR Stendra[tiab] OR Tadalafil[tiab] OR "UK 9248010"[tiab] OR Vardenafil[tiab] OR Viagra[tiab] | 11 533    |
| 8     | OR/4-7                                                                                                                                                                                                                                                                                                                                                                                                            | 12 874    |
| 9     | "Heart Diseases"[Mesh] OR "Heart Failure"[Mesh]                                                                                                                                                                                                                                                                                                                                                                   | 1 156 314 |
| 10    | (cardiac[tiab] OR heart[tiab]) AND (disease*[tiab] OR failure[tiab])                                                                                                                                                                                                                                                                                                                                              | 538 438   |
| 11    | 9 OR 10                                                                                                                                                                                                                                                                                                                                                                                                           | 1 374 722 |
| 12    | "preserved ejection fraction"[tiab]                                                                                                                                                                                                                                                                                                                                                                               | 5068      |
| 13    | 11 AND 12                                                                                                                                                                                                                                                                                                                                                                                                         | 4990      |
| 14    | HFpEF[tiab]                                                                                                                                                                                                                                                                                                                                                                                                       | 3096      |
| 15    | 13 OR 14                                                                                                                                                                                                                                                                                                                                                                                                          | 5516      |
| 16    | 3 AND 8 AND 15                                                                                                                                                                                                                                                                                                                                                                                                    | 37        |

Continued

|    |                                    |    |
|----|------------------------------------|----|
| 17 | "Animals"[Mesh] NOT "Humans"[Mesh] | NA |
| 18 | 21 NOT 22                          | 37 |
| 19 | English[lang]                      | NA |
| 20 | 23 AND 24                          | 36 |
| 21 | 1990/1/1:3000/12/31[pdat]          | NA |
| 22 | 25 AND 26                          | 36 |

© ESC/ERS 2022

### 13.2.2. Cochrane

Search date: 12 April 2021

| Set # | Search strategy                                                                                                                                                                                                                                                                                                                                                                                                                        | Results |
|-------|----------------------------------------------------------------------------------------------------------------------------------------------------------------------------------------------------------------------------------------------------------------------------------------------------------------------------------------------------------------------------------------------------------------------------------------|---------|
| 1     | MeSH descriptor: [Hypertension, Pulmonary] explode all trees                                                                                                                                                                                                                                                                                                                                                                           | 1194    |
| 2     | pulmonary:ti,ab AND hypertensi*:ti,ab                                                                                                                                                                                                                                                                                                                                                                                                  | 4586    |
| 3     | 1 OR 2                                                                                                                                                                                                                                                                                                                                                                                                                                 | 4743    |
| 4     | MeSH descriptor: [Phosphodiesterase 5 Inhibitors] explode all trees                                                                                                                                                                                                                                                                                                                                                                    | 382     |
| 5     | MeSH descriptor: [Sildenafil Citrate] explode all trees                                                                                                                                                                                                                                                                                                                                                                                | 962     |
| 6     | MeSH descriptor: [Tadalafil] explode all trees                                                                                                                                                                                                                                                                                                                                                                                         | 431     |
| 7     | MeSH descriptor: [Vardenafil Dihydrochloride] explode all trees                                                                                                                                                                                                                                                                                                                                                                        | 174     |
| 8     | Acetildenafil:ti,ab OR Avanafil:ti,ab OR Cialis:ti,ab OR Desmethylsildenafil:ti,ab OR Homosildenafil:ti,ab OR Hydroxyhomosildenafil:ti,ab OR IC351:ti,ab OR Levitra:ti,ab OR NCX911:ti,ab OR "PDE5":ti,ab OR "PDE5 inhibitors":ti,ab OR "phosphodiesterase type 5 inhibitors":ti,ab OR Revatio:ti,ab OR Sildenafil:ti,ab OR Staxyn:ti,ab OR Stendra:ti,ab OR Tadalafil:ti,ab OR "UK 9248010":ti,ab OR Vardenafil:ti,ab OR Viagra:ti,ab | 3344    |
| 9     | OR/4-8                                                                                                                                                                                                                                                                                                                                                                                                                                 | 3443    |
| 10    | MeSH descriptor: [Heart Failure] explode all trees                                                                                                                                                                                                                                                                                                                                                                                     | 9646    |
| 11    | MeSH descriptor: [Heart Diseases] explode all trees                                                                                                                                                                                                                                                                                                                                                                                    | 53 374  |
| 12    | (cardiac:ti,ab OR heart:ti,ab) AND (disease*:ti,ab OR failure:ti,ab)                                                                                                                                                                                                                                                                                                                                                                   | 64 506  |
| 13    | OR/10-12                                                                                                                                                                                                                                                                                                                                                                                                                               | 98 071  |
| 14    | "preserved ejection fraction":ti,ab                                                                                                                                                                                                                                                                                                                                                                                                    | 964     |
| 15    | 13 AND 14                                                                                                                                                                                                                                                                                                                                                                                                                              | 949     |
| 16    | HFpEF:ti,ab                                                                                                                                                                                                                                                                                                                                                                                                                            | 754     |
| 17    | 14 OR 15                                                                                                                                                                                                                                                                                                                                                                                                                               | 1087    |
| 18    | 3 AND 9 AND 17                                                                                                                                                                                                                                                                                                                                                                                                                         | 24      |

© ESC/ERS 2022

## 13.3. Literature search strategies for PICO III

### 13.3.1. Pubmed

Search date: 12 April 2021

| Set # | Search strategy                                                                                                                                                                                                                                                                                                                                                                                                  | Results |
|-------|------------------------------------------------------------------------------------------------------------------------------------------------------------------------------------------------------------------------------------------------------------------------------------------------------------------------------------------------------------------------------------------------------------------|---------|
| 1     | "Hypertension, Pulmonary"[Mesh]                                                                                                                                                                                                                                                                                                                                                                                  | 37 397  |
| 2     | (pulmonary[tiab] AND hypertensi*[tiab])                                                                                                                                                                                                                                                                                                                                                                          | 58 338  |
| 3     | 1 OR 2                                                                                                                                                                                                                                                                                                                                                                                                           | 65 794  |
| 4     | "Phosphodiesterase 5 Inhibitors"[Mesh] OR "Sildenafil Citrate"[Mesh] OR "Tadalafil"[Mesh] OR "Vardenafil Dihydrochloride"[Mesh]                                                                                                                                                                                                                                                                                  | 8411    |
| 5     | "Phosphodiesterase 5 Inhibitors" [Pharmacological Action]                                                                                                                                                                                                                                                                                                                                                        | 8485    |
| 6     | "avanafil"[Supplementary Concept]                                                                                                                                                                                                                                                                                                                                                                                | 59      |
| 7     | Acetildenafil[tiab] OR Avanafil[tiab] OR Cialis[tiab] OR Desmethylsildenafil[tiab] OR Homosildenafil[tiab] OR Hydroxyhomosildenafil[tiab] OR IC351[tiab] OR Levitra[tiab] OR NCX911[tiab] OR "PDE5"[tiab] OR "PDE5"[tiab] OR "phosphodiesterase type 5"[tiab] OR Revatio[tiab] OR Sildenafil[tiab] OR Staxyn[tiab] OR Stendra[tiab] OR Tadalafil[tiab] OR "UK 9248010"[tiab] OR Vardenafil[tiab] OR Viagra[tiab] | 11 533  |
| 8     | OR/4-7                                                                                                                                                                                                                                                                                                                                                                                                           | 12 874  |
| 9     | "Lung Diseases, Interstitial"[Mesh]                                                                                                                                                                                                                                                                                                                                                                              | 57 008  |
| 10    | (lung[tiab] OR pulmonary[tiab] OR pneumonia*[tiab]) AND (interstitial[tiab] OR idiopathic[tiab] OR fibro*[tiab])                                                                                                                                                                                                                                                                                                 | 103 277 |
| 11    | 9 OR 10                                                                                                                                                                                                                                                                                                                                                                                                          | 147 813 |
| 12    | 3 AND 8 AND 11                                                                                                                                                                                                                                                                                                                                                                                                   | 405     |
| 13    | "Animals"[Mesh] NOT "Humans"[Mesh]                                                                                                                                                                                                                                                                                                                                                                               | NA      |
| 14    | 12 NOT 13                                                                                                                                                                                                                                                                                                                                                                                                        | 384     |
| 15    | English[lang]                                                                                                                                                                                                                                                                                                                                                                                                    | NA      |
| 16    | 14 AND 15                                                                                                                                                                                                                                                                                                                                                                                                        | 342     |
| 17    | 1990/1/1:3000/12/31[pdat]                                                                                                                                                                                                                                                                                                                                                                                        | NA      |
| 18    | 16 AND 17                                                                                                                                                                                                                                                                                                                                                                                                        | 342     |

© ESC/ERS 2022

### 13.3.2. Cochrane

Search date: 12 April 2021

| Set # | Search strategy                                                                                                                                                                                                                                                                                                                                                                                                  | Results |
|-------|------------------------------------------------------------------------------------------------------------------------------------------------------------------------------------------------------------------------------------------------------------------------------------------------------------------------------------------------------------------------------------------------------------------|---------|
| 1     | MeSH descriptor: [Hypertension, Pulmonary] explode all trees                                                                                                                                                                                                                                                                                                                                                     | 1194    |
| 2     | pulmonary:ti,ab AND hypertensi*:ti,ab                                                                                                                                                                                                                                                                                                                                                                            | 4586    |
| 3     | 1 OR 2                                                                                                                                                                                                                                                                                                                                                                                                           | 4743    |
| 4     | MeSH descriptor: [Phosphodiesterase 5 Inhibitors] explode all trees                                                                                                                                                                                                                                                                                                                                              | 382     |
| 5     | MeSH descriptor: [Sildenafil Citrate] explode all trees                                                                                                                                                                                                                                                                                                                                                          | 962     |
| 6     | MeSH descriptor: [Tadalafil] explode all trees                                                                                                                                                                                                                                                                                                                                                                   | 431     |
| 7     | MeSH descriptor: [Vardenafil Dihydrochloride] explode all trees                                                                                                                                                                                                                                                                                                                                                  | 174     |
| 8     | Acetildenafil:ti,ab OR Avanafil:ti,ab OR Cialis:ti,ab OR Desmethylsildenafil:ti,ab OR Homosildenafil:ti,ab OR Hydroxyhomosildenafil:ti,ab OR IC351:ti,ab OR Levitra:ti,ab OR NCX911:ti,ab OR "PDE5":ti,ab OR "PDE5":ti,ab OR "phosphodiesterase type 5":ti,ab OR Revatio:ti,ab OR Sildenafil:ti,ab OR Staxyn:ti,ab OR Stendra:ti,ab OR Tadalafil:ti,ab OR "UK 9248010":ti,ab OR Vardenafil:ti,ab OR Viagra:ti,ab | 3344    |
| 9     | OR/4-8                                                                                                                                                                                                                                                                                                                                                                                                           | 3443    |
| 10    | MeSH descriptor: [Lung Diseases, Interstitial] explode all trees                                                                                                                                                                                                                                                                                                                                                 | 781     |
| 11    | (lung:ti,ab OR pulmonary:ti,ab OR pneumonia*:ti,ab) AND (interstitial:ti,ab OR idiopathic:ti,ab OR fibro*:ti,ab)                                                                                                                                                                                                                                                                                                 | 6424    |
| 12    | 10 OR 11                                                                                                                                                                                                                                                                                                                                                                                                         | 6828    |
| 13    | 3 AND 9 AND 12                                                                                                                                                                                                                                                                                                                                                                                                   | 123     |

© ESC/ERS 2022

## 13.4. Literature search strategies for PICO IV

### 13.4.1. Pubmed

Search date: 12 April 2021

| Set # | Search strategy                                                      | Results   |
|-------|----------------------------------------------------------------------|-----------|
| 1     | "Hypertension, Pulmonary"[Mesh]                                      | 37 397    |
| 2     | "chronic thromboembolic pulmonary hypertension"[tiab] OR CTEPH[tiab] | 2331      |
| 3     | 1 OR 2                                                               | 38 031    |
| 4     | "Angioplasty, Balloon"[Mesh]                                         | 53 390    |
| 5     | "balloon pulmonary angioplasty"[tiab]                                | 3483      |
| 6     | 4 OR 5                                                               | 53 527    |
| 7     | "Drug Therapy"[Mesh]                                                 | 1 393 014 |
| 8     | "drug therapy" [Subheading]                                          | 2 298 054 |

Continued

|    |                                                                                                              |           |
|----|--------------------------------------------------------------------------------------------------------------|-----------|
| 9  | drug therap*[tiab] OR medical therap*[tiab] OR pulmonary vasodilator therap*[tiab] OR targeted therap*[tiab] | 139 797   |
| 10 | OR/7-9                                                                                                       | 3 124 966 |
| 8  | 3 AND 6 AND 10                                                                                               | 71        |
| 9  | "Animals"[Mesh] NOT "Humans"[Mesh]                                                                           | NA        |
| 10 | 8 NOT 9                                                                                                      | 71        |
| 11 | English[lang]                                                                                                | NA        |
| 12 | 10 AND 11                                                                                                    | 67        |
| 13 | 1990/1/1:3000/12/31[pdat]                                                                                    | NA        |
| 14 | 12 AND 13                                                                                                    | 67        |

© ESC/ERS 2022

### 13.4.2. Cochrane

Search date: 12 April 2021

| Set # | Search strategy                                                                                              | Results |
|-------|--------------------------------------------------------------------------------------------------------------|---------|
| 1     | MeSH descriptor: [Hypertension, Pulmonary] explode all trees                                                 | 1194    |
| 2     | "chronic thromboembolic pulmonary hypertension":ti,ab OR CTEPH:ti,ab                                         | 243     |
| 3     | 1 OR 2                                                                                                       | 1370    |
| 4     | MeSH descriptor: [Angioplasty, Balloon] explode all trees                                                    | 4117    |
| 5     | "balloon pulmonary angioplasty":ti,ab                                                                        | 24      |
| 6     | 4 OR 5                                                                                                       | 4138    |
| 7     | MeSH descriptor: [Drug Therapy] explode all trees                                                            | 142 349 |
| 8     | Any MeSH descriptor in all MeSH products and with qualifier(s): [drug therapy - DT]                          | 204 370 |
| 9     | drug therap*:ti,ab OR medical therap*:ti,ab OR pulmonary vasodilator therap*:ti,ab OR targeted therap*:ti,ab | 231 579 |
| 10    | OR/7-9                                                                                                       | 404 809 |
| 11    | 3 AND 6 AND 10                                                                                               | 8       |

© ESC/ERS 2022

## 13.5. Literature search strategies for key narrative question 1

### 13.5.1. Search strategies (main)

#### Data sources

The following were searched from 1 January 1946 to 1 November 2020 for English language, peer-reviewed publications: Pubmed (MEDLINE), EMBASE, Web of Science, and Cochrane Central Register of Controlled Trials. Six different analyses for six different questions were performed.

The first research question looked into the **prognostic relevance of pulmonary vascular resistance**. The following keywords and Medical Subject Heading terms (MESH) were used:

'pulmonary vascular resistance (MESH)', 'total pulmonary resistance', 'PVR', 'TPR', 'total pulmonary vascular resistance', 'mortality (MESH)', 'prognosis', 'outcome', 'death', 'prognos\*', 'survival', 'Pulmonary Hypertension (MESH)', 'Pulmonary Artery Hypertension', and 'Pulmonary Arterial Hypertension'.

The second research question was about the **prognostic relevance of mPAP**. The following keywords and MESH terms were used: 'mean pulmonary arterial pressure (MESH)', 'Pulmonary Arterial Pressure', 'mPAP', 'meanPAP', 'mean pulmonary arterial pressure', 'mean pulmonary artery pressure', 'PAPm', 'Pulmonary Artery Pressure', 'Pulmonary Hypertension (MESH)', 'Pulmonary Artery Hypertension', 'Pulmonary Arterial Hypertension', 'mortality (MESH)', 'prognosis', 'outcome', 'death', 'prognos\*', 'survival', 'Pulmonary Hypertension (MESH)', 'Pulmonary Artery Hypertension', and 'Pulmonary Arterial Hypertension'.

The third research question included the **prognostic relevance of PAWP**. The following keywords and MESH terms were used: 'pulmonary arterial wedge pressure (MESH)', 'pulmonary wedge pressure', 'pulmonary artery wedge pressure', 'PAWP', 'Pulmonary Capillary Wedge Pressure', 'pulmonary capillary pressure', 'pulmonary artery occlusion pressure', 'PAOP', 'PCWP', 'pulmonary arterial occlusion pressure', 'pulmonary venous wedge pressure', 'PVWP', 'pulmonary venous pressure', 'lung venous pressure', 'mortality (MESH)', 'prognosis', 'outcome', 'death', 'prognos\*', 'survival', 'Pulmonary Hypertension (MESH)', 'Pulmonary Artery Hypertension', and 'Pulmonary Arterial Hypertension'.

The fourth research question focused on **normative values of PVR** in healthy subjects measured by RHC. The following keywords and MESH terms were used: 'right heart catheterization (MESH)', 'pulmonary catheter', 'pulmonar\* arter\* cathet\*', 'right heart catheter\*', 'right cardiac\* cathet\*', 'cardiac\* cathet\*', 'healthy (MESH)', 'health', 'normal', 'normative', 'athletes', 'pulmonary vascular resistance (MESH)', 'total pulmonary resistance', 'PVR', 'TPR', and 'total pulmonary vascular resistance'.

The fifth research question investigated the **normative values of mPAP** in healthy subjects by RHC. The following keywords and MESH terms were used: 'right heart catheterization (MESH)', 'pulmonary catheter', 'pulmonar\* arter\* cathet\*', 'right heart catheter\*', 'right cardiac\* cathet\*', 'cardiac\* cathet\*', 'healthy (MESH)', 'health', 'normal', 'normative', 'athletes', 'mean pulmonary arterial pressure (MESH)', 'Pulmonary Arterial Pressure', 'Pulmonary Artery Pressure', 'mPAP', 'meanPAP', 'mean pulmonary arterial pressure', 'mean pulmonary artery pressure', and 'PAPm'.

The sixth research question looked into the **normative values of PAWP** in healthy subjects by RHC. The following keywords and MESH terms were used: 'right heart catheterization (MESH)', 'pulmonary catheter', 'pulmonar\* arter\* cathet\*', 'right heart catheter\*', 'right cardiac\* cathet\*', 'cardiac\* cathet\*', 'healthy (MESH)', 'health', 'normal', 'normative', 'athletes', 'pulmonary arterial wedge pressure (MESH)', 'pulmonary wedge pressure', 'pulmonary artery wedge pressure', 'PAWP', 'Pulmonary Capillary Wedge Pressure', 'pulmonary capillary pressure', 'pulmonary artery occlusion pressure', 'PAOP', 'PCWP', 'pulmonary arterial occlusion pressure', 'pulmonary venous wedge pressure', 'PVWP', 'pulmonary venous pressure', and 'lung venous pressure'.

### Study selection

Prognostic studies were included if: (1) pulmonary haemodynamics were assessed by RHC, with at least one valid measurement at rest and (2) the end-point of prognosis was mortality. Studies on normative data were included if: (1) pulmonary haemodynamics were assessed by RHC, with at least one valid measurement at rest and (2) the study included at least one group of subjects that were claimed as healthy.

### Data extraction and quality assessment

Study eligibility and quality were evaluated by two physicians independently. Data extraction was performed by the same physicians using standardized data collection sheets. Disagreements were resolved by consensus.

### Outcomes

The primary outcome of interest for the prognostic questions was all-cause mortality. The primary outcome of interest of the normative values was pulmonary haemodynamics in healthy subjects.

### Acknowledgements

We thank Dr Katarina Zeder and Gregor Steinrissler for their help in performing the systematic literature review.

## 13.5.2. Pubmed

Search date: 12 April 2021

| Set # | Search strategy                                                                                                                                                                                                                                                                                                                                              | Results |
|-------|--------------------------------------------------------------------------------------------------------------------------------------------------------------------------------------------------------------------------------------------------------------------------------------------------------------------------------------------------------------|---------|
| 1     | "Hemodynamics"[Mesh]                                                                                                                                                                                                                                                                                                                                         | 690 654 |
| 2     | hemodynamic*[tiab] OR haemodynamic*[tiab]                                                                                                                                                                                                                                                                                                                    | 185 657 |
| 3     | 1 OR 2                                                                                                                                                                                                                                                                                                                                                       | 771 723 |
| 4     | pulmonary[tiab]                                                                                                                                                                                                                                                                                                                                              | 567 245 |
| 5     | 3 AND 4                                                                                                                                                                                                                                                                                                                                                      | 65 576  |
| 6     | "Hypertension, Pulmonary"[Mesh]                                                                                                                                                                                                                                                                                                                              | 37 397  |
| 7     | (pulmonary[tiab] AND hypertensi*[tiab])                                                                                                                                                                                                                                                                                                                      | 58 338  |
| 8     | 6 OR 7                                                                                                                                                                                                                                                                                                                                                       | 65 794  |
| 9     | "Cardiac Catheterization"[Mesh]                                                                                                                                                                                                                                                                                                                              | 51 836  |
| 10    | (arter*[tiab] OR cardiac[tiab] OR heart[tiab] OR pulmonary[tiab]) AND catheter*[tiab]                                                                                                                                                                                                                                                                        | 98 496  |
| 11    | 9 OR 10                                                                                                                                                                                                                                                                                                                                                      | 130 210 |
| 12    | right[tiab]                                                                                                                                                                                                                                                                                                                                                  | 551 254 |
| 13    | 11 AND 12                                                                                                                                                                                                                                                                                                                                                    | 27 174  |
| 14    | "Arterial Pressure"[Mesh] OR "Pulmonary Wedge Pressure"[Mesh] OR "Vascular Resistance"[Mesh]                                                                                                                                                                                                                                                                 | 51 128  |
| 15    | "arterial pressure"[tiab] OR "artery pressure"[tiab] OR "mean pulmonary arterial pressure"[tiab] OR "mean pulmonary artery pressure"[tiab] OR "pulmonary arterial pressure"[tiab] OR "pulmonary artery pressure"[tiab] OR "pulmonary vascular resistance"[tiab] OR "pulmonary wedge pressure"[tiab] OR "vascular resistance"[tiab] OR "wedge pressure"[tiab] | 96 579  |
| 16    | 14 OR 15                                                                                                                                                                                                                                                                                                                                                     | 126 089 |
| 17    | 5 AND 8 AND 13 AND 16                                                                                                                                                                                                                                                                                                                                        | 2085    |
| 18    | "Animals"[Mesh] NOT "Humans"[Mesh]                                                                                                                                                                                                                                                                                                                           | NA      |
| 19    | 17 NOT 18                                                                                                                                                                                                                                                                                                                                                    | 1926    |
| 20    | English[lang]                                                                                                                                                                                                                                                                                                                                                | NA      |
| 21    | 19 AND 20                                                                                                                                                                                                                                                                                                                                                    | 1703    |

Continued

|    |                                                                                                                    |              |
|----|--------------------------------------------------------------------------------------------------------------------|--------------|
| 22 | 1990/1/1:3000/12/31[mdat]                                                                                          | NA           |
| 23 | 21 AND 22                                                                                                          | 1566         |
| 24 | health*[tiab] OR normal*[tiab] OR normative*[tiab]                                                                 | 4 748<br>751 |
| 25 | "burden of disease"*[tiab] OR death*[tiab] OR mortalit*[tiab] OR outcome*[tiab] OR prognos*[tiab] OR surviv*[tiab] | 4 065<br>820 |
| 26 | 24 OR 25                                                                                                           | 7 845<br>557 |
| 27 | 23 AND 26                                                                                                          | 982          |

© ESC/ERS 2022

### 13.5.3. Cochrane

Search date: 12 April 2021

| Set # | Search strategy                                                                                                                                                                                                                                                                                                                                              | Results |
|-------|--------------------------------------------------------------------------------------------------------------------------------------------------------------------------------------------------------------------------------------------------------------------------------------------------------------------------------------------------------------|---------|
| 1     | MeSH descriptor: [Hemodynamics] explode all trees                                                                                                                                                                                                                                                                                                            | 51 982  |
| 2     | hemodynamic*:ti,ab OR haemodynamic*:ti,ab                                                                                                                                                                                                                                                                                                                    | 30 916  |
| 3     | 1 OR 2                                                                                                                                                                                                                                                                                                                                                       | 73 224  |
| 4     | pulmonary:ti,ab                                                                                                                                                                                                                                                                                                                                              | 47 656  |
| 5     | 3 AND 4                                                                                                                                                                                                                                                                                                                                                      | 5472    |
| 6     | MeSH descriptor: [Hypertension, Pulmonary] explode all trees                                                                                                                                                                                                                                                                                                 | 1194    |
| 7     | pulmonary:ti,ab AND hypertensi*:ti,ab                                                                                                                                                                                                                                                                                                                        | 4586    |
| 8     | 6 OR 7                                                                                                                                                                                                                                                                                                                                                       | 4743    |
| 9     | MeSH descriptor: [Cardiac Catheterization] explode all trees                                                                                                                                                                                                                                                                                                 | 1344    |
| 10    | (arter*:ti,ab OR cardiac:ti,ab OR heart:ti,ab OR pulmonary:ti,ab) AND catheter*:ti,ab                                                                                                                                                                                                                                                                        | 9982    |
| 11    | 9 OR 10                                                                                                                                                                                                                                                                                                                                                      | 10 585  |
| 12    | right:ti,ab                                                                                                                                                                                                                                                                                                                                                  | 27 832  |
| 13    | 11 AND 12                                                                                                                                                                                                                                                                                                                                                    | 1658    |
| 14    | MeSH descriptor: [Arterial Pressure] explode all trees                                                                                                                                                                                                                                                                                                       | 434     |
| 15    | MeSH descriptor: [Pulmonary Wedge Pressure] explode all trees                                                                                                                                                                                                                                                                                                | 380     |
| 16    | MeSH descriptor: [Vascular Resistance] explode all trees                                                                                                                                                                                                                                                                                                     | 2060    |
| 17    | "arterial pressure":ti,ab OR "artery pressure":ti,ab OR "mean pulmonary arterial pressure":ti,ab OR "mean pulmonary artery pressure":ti,ab OR "pulmonary arterial pressure":ti,ab OR "pulmonary artery pressure":ti,ab OR "pulmonary vascular resistance":ti,ab OR "pulmonary wedge pressure":ti,ab OR "vascular resistance":ti,ab OR "wedge pressure":ti,ab | 14 614  |
| 18    | OR/14-17                                                                                                                                                                                                                                                                                                                                                     | 15 794  |
| 19    | 5 AND 8 AND 13 AND 18                                                                                                                                                                                                                                                                                                                                        | 196     |
| 20    | health*:ti,ab OR normal*:ti,ab OR normative*:ti,ab                                                                                                                                                                                                                                                                                                           | 410 308 |
| 21    | "burden of disease"*:ti,ab OR death*:ti,ab OR                                                                                                                                                                                                                                                                                                                | 600 251 |

Continued

|    |                                                                      |         |
|----|----------------------------------------------------------------------|---------|
|    | mortalit*:ti,ab OR outcome*:ti,ab OR prognos*:ti,ab OR surviv*:ti,ab |         |
| 22 | 20 OR 21                                                             | 835 523 |
| 23 | 19 AND 22                                                            | 115     |
| 24 | 1990-current                                                         | NA      |
| 25 | 23 OR 24                                                             | 114     |

© ESC/ERS 2022

## 13.6. Literature search strategies for key narrative question 2

### 13.6.1. Search strategies (main)

#### 13.6.1.1. Cardiopulmonary exercise testing in pulmonary hypertension for diagnosis

##### STEP 1

Entry terms (PubMed):

(Pulmonary hypertension diagnosis) AND (Cardiopulmonary Exercise Testing)

Search results: 1845 journal articles

Search conducted: February 2021

##### STEP 2

Filters (PubMed):

- Results by years 1996–2021

Search results: 1618 journal articles

Search conducted: February 2021

- ((english[Filter]) AND (humans[Filter]) AND (adult:19+years[Filter]))

Search results: 1130 journal articles

Search conducted: February 2021

##### STEP 3

Eligible criteria (abstract and title review):

Inclusion criteria:

- Original articles on PH patients

- Pulmonary hypertension diagnosis based on RHC

- Results from studies with sample size PAH cohorts  $\geq 20$  patients

- CPET variables associated with PH diagnosis

Exclusion criteria:

- Results from studies with sample size PAH cohorts  $< 20$  patients

- Pulmonary hypertension diagnosis based on echocardiography

Search results: nine journal articles

Search conducted: February 2021

##### STEP 4

Methodological criteria

- CPET used as a tool in suspected patients for PAH

- Increased accuracy of standard criteria for diagnosis of mPAP  $> 20$  mmHg

Search results: two journal articles

Search conducted: February 2021

Supplementary research strategy

Between STEP 2 and STEP 3 supplementary searches were conducted:

- PubMed similar articles function
  - References from systematic reviews
  - Manual searching for known studies
- Search results: three journal articles  
Search conducted: February 2021

### 13.6.1.2. Echocardiography in pulmonary hypertension for diagnosis

#### Search strategy

##### STEP 1

Entry terms (PubMed):

((("Pulmonary Hypertension Diagnosis"[Mesh]) OR ("pulmonary hypertension diagnosis")) AND "Echocardiography"[Mesh]))

Search results: 6025 journal articles

Search conducted: February 2021

##### STEP 2

Filters (PubMed):

- Results by years 1996–2021

Search results: 5016 journal articles

Search conducted: February 2021

- ((english[Filter]) AND (humans[Filter]) AND (adult:19+years[Filter]))

Search results: 3009 journal articles

Search conducted: February 2021

##### STEP 3

Eligible criteria (abstract and title review):

Inclusion criteria:

- Original articles on PH patients
- Pulmonary hypertension diagnosis based on RHC
- Results from studies with sample size PAH cohorts  $\geq 20$  patients

Exclusion criteria:

- Results from studies with sample size PAH cohorts  $< 20$  patients
- Pulmonary hypertension diagnosis based on echocardiography

Search results: 67 journal articles

Search conducted: February 2021

##### STEP 4

Methodological criteria (full manuscript review)

- One or more echocardiographic variable(s) of PH signs, according to the 2022 ESC/ERS Guidelines for the diagnosis and treatment of pulmonary hypertension

- Peak TR velocity
- Right ventricle/LV basal diameter ratio  $> 1.0$
- Flattening of the interventricular septum (LV eccentricity index  $> 1.1$  in systole and/or diastole)
- Right ventricular outflow Doppler acceleration time  $< 105$  msec and/or mid-systolic notching
- Early diastolic pulmonary regurgitation velocity  $> 2.2$  m/sec
- PA diameter  $> 25$  mm
- Inferior cava diameter  $> 21$  mm with decreased inspiratory collapse ( $< 50\%$  with a sniff or  $< 20\%$  with quiet inspiration)
- Right atrial area (end-systole)  $> 18$  cm<sup>2</sup>
- Compared with new methodological criteria for increased accuracy to detect mPAP  $> 20$  mmHg

Search results: 0  
Search conducted: February 2021

### 13.6.2. Pubmed

Search date: 12 April 2021

| Set # | Search strategy                                                                       | Results    |
|-------|---------------------------------------------------------------------------------------|------------|
| 1     | "pulmonary arterial hypertension"[tiab]                                               | 12 889     |
| 2     | "Echocardiography"[Mesh]                                                              | 139 477    |
| 3     | echocardiograph*[tiab]                                                                | 147 529    |
| 4     | 2 OR 3                                                                                | 199 865    |
| 5     | "Diagnosis"[Mesh]                                                                     | 8 755 313  |
| 6     | "diagnosis" [Subheading]                                                              | 3 668 679  |
| 7     | probability[tiab] OR diagnos*[tiab]                                                   | 2 812 268  |
| 8     | OR/5-7                                                                                | 10 779 000 |
| 9     | "Cardiac Catheterization"[Mesh]                                                       | 51 836     |
| 10    | (arter*[tiab] OR cardiac[tiab] OR heart[tiab] OR pulmonary[tiab]) AND catheter*[tiab] | 98 496     |
| 11    | 9 OR 10                                                                               | 130 210    |
| 12    | right[tiab]                                                                           | 551 254    |
| 13    | 11 AND 12                                                                             | 27 174     |
| 14    | 1 AND 4 AND 8 AND 13                                                                  | 576        |
| 15    | English[lang]                                                                         | NA         |
| 16    | 14 AND 15                                                                             | 498        |
| 17    | 1990/1/1:3000/12/31[pdat]                                                             | NA         |
| 18    | 16 AND 17                                                                             | 487        |

© ESC/ERS 2022

### 13.6.3. Cochrane

Search date: 12 April 2021

| Set # | Search strategy                                                                       | Results |
|-------|---------------------------------------------------------------------------------------|---------|
| 1     | "pulmonary arterial hypertension":ti,ab                                               | 1446    |
| 2     | MeSH descriptor: [Echocardiography] explode all trees                                 | 4188    |
| 3     | echocardiograph*:ti,ab                                                                | 11 369  |
| 4     | 2 OR 3                                                                                | 2969    |
| 5     | MeSH descriptor: [Diagnosis] explode all trees                                        | 337 591 |
| 6     | Any MeSH descriptor in all MeSH products and with qualifier(s): [diagnosis - DI]      | 52 946  |
| 7     | probability:ti,ab OR diagnos*:ti,ab                                                   | 163 468 |
| 8     | OR/5-7                                                                                | 479 699 |
| 9     | MeSH descriptor: [Cardiac Catheterization] explode all trees                          | 1344    |
| 10    | (arter*:ti,ab OR cardiac:ti,ab OR heart:ti,ab OR pulmonary:ti,ab) AND catheter*:ti,ab | 9982    |
| 11    | 9 OR 10                                                                               | 10 585  |
| 12    | right:ti,ab                                                                           | 27 832  |
| 13    | 11 AND 12                                                                             | 1658    |
| 14    | 1 AND 4 AND 8 AND 13                                                                  | 1       |

© ESC/ERS 2022

### 13.7. Literature search strategies for key narrative question 3

#### 13.7.1. Search strategies (main)

Ovid SP was used to search MEDLINE on 28 October 2020. Search terms were: 'pulmonary hypertension' or 'pulmonary arterial hypertension' AND 'systemic sclerosis' or 'scleroderma' or 'connective tissue disease' AND 'detection' or 'screening' or 'diagnosis'

#### 13.7.2. Pubmed

Search date: 12 April 2021

| Set # | Search strategy                                                                                                           | Results      |
|-------|---------------------------------------------------------------------------------------------------------------------------|--------------|
| 1     | "Hypertension, Pulmonary"[Mesh]                                                                                           | 37 397       |
| 2     | (pulmonary[tiab] AND hypertensi*[tiab])                                                                                   | 58 338       |
| 3     | 1 OR 2                                                                                                                    | 65 794       |
| 4     | "Scleroderma, Systemic"[Mesh]                                                                                             | 21 086       |
| 5     | ((diffuse[tiab] OR limited[tiab] OR systemic[tiab]) AND (scleroderma[tiab] OR sclerosis[tiab])) OR "CREST Syndrome"[tiab] | 30 165       |
| 6     | 4 OR 5                                                                                                                    | 37 527       |
| 7     | screen*[tiab] OR detect*[tiab]                                                                                            | 3 065<br>944 |
| 8     | 3 AND 6 AND 7                                                                                                             | 480          |
| 9     | English[lang]                                                                                                             | NA           |
| 10    | 8 AND 9                                                                                                                   | 433          |
| 11    | 1990/1/1:3000/12/31[pdat]                                                                                                 | NA           |
| 12    | 10 AND 11                                                                                                                 | 427          |

© ESC/ERS 2022

#### 13.7.3. Cochrane

Search date: 12 April 2021

| Set # | Search strategy                                                                                                           | Results |
|-------|---------------------------------------------------------------------------------------------------------------------------|---------|
| 1     | MeSH descriptor: [Hypertension, Pulmonary] explode all trees                                                              | 1194    |
| 2     | pulmonary:ti,ab AND hypertensi*:ti,ab                                                                                     | 4586    |
| 3     | 1 OR 2                                                                                                                    | 4743    |
| 4     | MeSH descriptor: [Scleroderma, Systemic] explode all trees                                                                | 577     |
| 5     | ((diffuse:ti,ab OR limited:ti,ab OR systemic:ti,ab) AND (scleroderma:ti,ab OR sclerosis:ti,ab)) OR "CREST Syndrome":ti,ab | 2055    |
| 6     | 4 OR 5                                                                                                                    | 2152    |
| 7     | screen*:ti,ab OR detect*:ti,ab                                                                                            | 147 955 |
| 8     | 3 AND 6 AND 7                                                                                                             | 30      |

© ESC/ERS 2022

### 13.8. Literature search strategies for key narrative question 4

#### 13.8.1. Search strategies (main)

i.) EMBASE

PAH, 268 results (with filters): 18 January 2021

Search terms: ('pulmonary arterial hypertension' OR 'pulmonary artery hypertension' OR 'pah') AND ('risk assessment'/exp OR 'risk algorithm'/exp OR 'risk score' OR 'risk stratification') AND ('therapy' OR 'prognosis' OR 'survival' OR 'mortality' OR 'outcome' OR 'outcomes') AND ([article]/lim OR [article in press]/lim OR [review]/lim) AND [english]/lim AND ([adult]/lim OR [young adult]/lim OR [middle aged]/lim OR [aged]/lim OR [very elderly]/lim) AND [humans]/lim

ii.) PubMed

PAH, 191 results (with filters): 18 January 2021

Search terms: (((("Pulmonary Arterial Hypertension"[Mesh]) OR ("pulmonary arterial hypertension" OR "pulmonary artery hypertension" OR "PAH"))) AND (((("Risk Assessment"[Mesh]) OR ("risk assessment")) OR ("risk stratification")) OR ("risk score")) OR ("risk algorithm")) AND (((("Therapeutics"[Mesh]) OR ("Survival"[Mesh])) OR ("Prognosis"[Mesh])) OR ("Mortality"[Mesh])) OR ("outcomes") OR ("outcome") AND ((humans[Filter]) AND (english[Filter])) AND ((humans[Filter]) AND (english[Filter]) AND (alladult[Filter]))

#### 13.8.2. Pubmed

Search date: 12 April 2021

| Set # | Search strategy                                                                                                                                                                                                                                                                                                                                                                                                                             | Results |
|-------|---------------------------------------------------------------------------------------------------------------------------------------------------------------------------------------------------------------------------------------------------------------------------------------------------------------------------------------------------------------------------------------------------------------------------------------------|---------|
| 1     | "Hypertension, Pulmonary"[Majr]                                                                                                                                                                                                                                                                                                                                                                                                             | 29 328  |
| 2     | (pulmonary[ti] AND hypertensi*[ti])                                                                                                                                                                                                                                                                                                                                                                                                         | 26 904  |
| 3     | 1 OR 2                                                                                                                                                                                                                                                                                                                                                                                                                                      | 33 957  |
| 4     | "Comparative, Prospective Registry of Newly Initiated Therapies for Pulmonary Hypertension"[tiab] OR COMPERA[tiab] OR (French[tiab] AND (invasive[tiab] OR noninvasive[tiab])) OR "Registry to Evaluate Early and Long-term PAH Disease Management"[tiab] OR "REVEAL 2.0"[tiab] OR "REVEAL Registry"[tiab] OR "REVEAL Risk Score"[tiab] OR "risk assessment "[tiab] OR "risk stratification"[tiab] OR SPAHR OR "Swedish PAH Registry"[tiab] | 105 333 |
| 5     | 3 AND 4                                                                                                                                                                                                                                                                                                                                                                                                                                     | 343     |
| 6     | ((("Adolescent Medicine"[Mesh] OR "Pediatrics"[Mesh] OR "Adolescent"[Mesh] OR "Child"[Mesh] OR "Infant"[Mesh]) NOT "Adult"[Mesh])                                                                                                                                                                                                                                                                                                           | NA      |
| 7     | 5 NOT 6                                                                                                                                                                                                                                                                                                                                                                                                                                     | 332     |
| 8     | "Animals"[Mesh] NOT "Humans"[Mesh]                                                                                                                                                                                                                                                                                                                                                                                                          | NA      |
| 9     | 7 NOT 8                                                                                                                                                                                                                                                                                                                                                                                                                                     | 330     |
| 10    | English[lang]                                                                                                                                                                                                                                                                                                                                                                                                                               | NA      |
| 11    | 9 AND 10                                                                                                                                                                                                                                                                                                                                                                                                                                    | 314     |
| 12    | 1990/1/1:3000/12/31[pdat]                                                                                                                                                                                                                                                                                                                                                                                                                   | NA      |
| 13    | 11 AND 12                                                                                                                                                                                                                                                                                                                                                                                                                                   | 314     |

© ESC/ERS 2022

### 13.8.3. Cochrane

Search date: 12 April 2021

| Set # | Search strategy                                                                                                                                                                                                                                                                                                                                                                                                                               | Results |
|-------|-----------------------------------------------------------------------------------------------------------------------------------------------------------------------------------------------------------------------------------------------------------------------------------------------------------------------------------------------------------------------------------------------------------------------------------------------|---------|
| 1     | MeSH descriptor: [Hypertension, Pulmonary] explode all trees                                                                                                                                                                                                                                                                                                                                                                                  | 1194    |
| 2     | pulmonary:ti,ab AND hypertensi*:ti,ab                                                                                                                                                                                                                                                                                                                                                                                                         | 4586    |
| 3     | 1 OR 2                                                                                                                                                                                                                                                                                                                                                                                                                                        | 4743    |
| 4     | "Comparative, Prospective Registry of Newly Initiated Therapies for Pulmonary Hypertension": ti,ab OR COMPERA:ti,ab OR (French:ti,ab AND (invasive:ti,ab OR noninvasive:ti,ab)) OR "Registry to Evaluate Early and Long-term PAH Disease Management":ti,ab OR "REVEAL 2.0":ti,ab OR "REVEAL Registry":ti,ab OR "REVEAL Risk Score": ti,ab OR "risk assessment ":ti,ab OR "risk stratification":ti,ab OR SPAHR OR "Swedish PAH Registry":ti,ab | 4407    |
| 5     | 3 AND 4                                                                                                                                                                                                                                                                                                                                                                                                                                       | 53      |

© ESC/ERS 2022

## 13.9. Literature search strategies for key narrative question 5

### 13.9.1. Pubmed

Search date: 12 April 2021

| Set # | Search strategy                                                                                                                                                                                                                                                                                                | Results |
|-------|----------------------------------------------------------------------------------------------------------------------------------------------------------------------------------------------------------------------------------------------------------------------------------------------------------------|---------|
| 1     | "Hypertension, Pulmonary"[Mesh]                                                                                                                                                                                                                                                                                | 37 397  |
| 2     | (pulmonary[tiab] AND hypertensi*[tiab])                                                                                                                                                                                                                                                                        | 58 338  |
| 3     | 1 OR 2                                                                                                                                                                                                                                                                                                         | 65 794  |
| 4     | "Heart Failure"[Mesh] OR "Heart Valve Diseases"[Mesh] OR "Ventricular Dysfunction, Left"[Mesh]                                                                                                                                                                                                                 | 365 189 |
| 5     | ((heart[tiab] OR ventricular[tiab]) AND (disease[tiab] OR dysfunction[tiab] OR failure[tiab]))                                                                                                                                                                                                                 | 484 668 |
| 6     | 4 OR 5                                                                                                                                                                                                                                                                                                         | 617 809 |
| 7     | left[tiab]                                                                                                                                                                                                                                                                                                     | 698 310 |
| 8     | 6 AND 7                                                                                                                                                                                                                                                                                                        | 150 116 |
| 9     | "Atrasentan"[Mesh] OR "Bosentan"[Mesh] OR "Endothelin Receptor Antagonists"[Mesh]                                                                                                                                                                                                                              | 5883    |
| 10    | "Endothelin Receptor Antagonists"[Pharmacological Action]                                                                                                                                                                                                                                                      | 5901    |
| 11    | "A 192621"[Supplementary Concept] OR "ambrisentan"[Supplementary Concept] OR "BQ 788"[Supplementary Concept] OR "cyclo(Trp-Asp-Pro-Val-Leu)"[Supplementary Concept] OR "macitentan"[Supplementary Concept] OR "ZD4054"[Supplementary Concept]                                                                  | 2205    |
| 12    | A127722[tiab] OR A147627[tiab] OR A192621[tiab] OR ABT627[tiab] OR Ambrisentan[tiab] OR Atrasentan[tiab] OR Bosentan[tiab] OR BQ-123[tiab] OR BQ-788[tiab] OR BSF208075[tiab] OR "cyclo(D-Trp-D-Asp-Pro-D-Val-Leu)"[tiab] OR "endothelin receptor antagonists"[tiab] OR GSK1325760A[tiab] OR Letairis[tiab] OR | 5558    |

Continued

|    |                                                                                                                                                                                                                                                                                                                                                                                                                                        |        |
|----|----------------------------------------------------------------------------------------------------------------------------------------------------------------------------------------------------------------------------------------------------------------------------------------------------------------------------------------------------------------------------------------------------------------------------------------|--------|
|    | LU208075[tiab] OR macitentan[tiab] OR opsumit[tiab] OR "Ro 470203"[tiab] OR Sitaxentan[tiab] OR Tracleer[tiab] OR Xinlay[tiab] OR Zibotentan[tiab]                                                                                                                                                                                                                                                                                     |        |
| 13 | OR/9-12                                                                                                                                                                                                                                                                                                                                                                                                                                | 8350   |
| 14 | "Phosphodiesterase 5 Inhibitors"[Mesh] OR "Sildenafil Citrate"[Mesh] OR "Tadalafil"[Mesh] OR "Vardenafil Dihydrochloride"[Mesh]                                                                                                                                                                                                                                                                                                        | 8411   |
| 15 | "Phosphodiesterase 5 Inhibitors" [Pharmacological Action]                                                                                                                                                                                                                                                                                                                                                                              | 8485   |
| 16 | "avanafil"[Supplementary Concept]                                                                                                                                                                                                                                                                                                                                                                                                      | 59     |
| 17 | Acetildenafil[tiab] OR Avanafil[tiab] OR Cialis[tiab] OR Desmethylsildenafil[tiab] OR Homosildenafil[tiab] OR Hydroxyhomosildenafil[tiab] OR IC351[tiab] OR Levitra[tiab] OR NCX911[tiab] OR "PDE5"[tiab] OR "PDE5 inhibitors"[tiab] OR "phosphodiesterase type 5 inhibitors"[tiab] OR Revatio[tiab] OR Sildenafil[tiab] OR Staxyn[tiab] OR Stendra[tiab] OR Tadalafil[tiab] OR "UK 9248010"[tiab] OR Vardenafil[tiab] OR Viagra[tiab] | 10 470 |
| 18 | OR/14-17                                                                                                                                                                                                                                                                                                                                                                                                                               | 12 090 |
| 19 | "Soluble Guanylyl Cyclase"[Mesh]                                                                                                                                                                                                                                                                                                                                                                                                       | 1147   |
| 20 | "BAY 58-2667"[Supplementary Concept] OR "riociguat"[Supplementary Concept] OR "SgcA protein, Dictyostelium discoideum"[Supplementary Concept] OR "vericiguat"[Supplementary Concept]                                                                                                                                                                                                                                                   | 313    |
| 21 | adempas[tiab] OR cinaciguat[tiab] OR "guanylate cyclase"[tiab] OR riociguat[tiab] OR vericiguat[tiab] OR verquvo[tiab]                                                                                                                                                                                                                                                                                                                 | 7874   |
| 22 | OR/19-21                                                                                                                                                                                                                                                                                                                                                                                                                               | 8518   |
| 23 | "Epoprostenol"[Mesh] OR "Iloprost"[Mesh] OR "Receptors, Epoprostenol"[Mesh]                                                                                                                                                                                                                                                                                                                                                            | 14 245 |
| 24 | "treprostinil"[Supplementary Concept]                                                                                                                                                                                                                                                                                                                                                                                                  | 366    |
| 25 | ciloprost[tiab] OR flolan[tiab] OR orenitram[tiab] OR prostacyclin[tiab] OR remodulin[tiab] OR veletri[tiab] OR ventavis[tiab]                                                                                                                                                                                                                                                                                                         | 14 391 |
| 26 | OR/23-25                                                                                                                                                                                                                                                                                                                                                                                                                               | 20 053 |
| 27 | 13 OR 18 OR 22 OR 26                                                                                                                                                                                                                                                                                                                                                                                                                   | 46 639 |
| 28 | 3 AND 8 AND 27                                                                                                                                                                                                                                                                                                                                                                                                                         | 376    |
| 29 | English[lang]                                                                                                                                                                                                                                                                                                                                                                                                                          | NA     |
| 30 | 28 AND 29                                                                                                                                                                                                                                                                                                                                                                                                                              | 342    |
| 31 | 1990/1/1:3000/12/31[pdat]                                                                                                                                                                                                                                                                                                                                                                                                              | NA     |
| 32 | 30 AND 31                                                                                                                                                                                                                                                                                                                                                                                                                              | 340    |

© ESC/ERS 2022



### 13.9.2. Cochrane

Search date: 12 April 2021

| Set # | Search strategy                                                                                                                                                                                                                                                                                                                                                                                                                                                   | Results |
|-------|-------------------------------------------------------------------------------------------------------------------------------------------------------------------------------------------------------------------------------------------------------------------------------------------------------------------------------------------------------------------------------------------------------------------------------------------------------------------|---------|
| 1     | MeSH descriptor: [Hypertension, Pulmonary] explode all trees                                                                                                                                                                                                                                                                                                                                                                                                      | 1194    |
| 2     | pulmonary:ti,ab AND hypertensi*:ti,ab                                                                                                                                                                                                                                                                                                                                                                                                                             | 4586    |
| 3     | 1 OR 2                                                                                                                                                                                                                                                                                                                                                                                                                                                            | 4743    |
| 4     | MeSH descriptor: [Heart Failure] explode all trees                                                                                                                                                                                                                                                                                                                                                                                                                | 9646    |
| 5     | MeSH descriptor: [Heart Valve Diseases] explode all trees                                                                                                                                                                                                                                                                                                                                                                                                         | 2132    |
| 6     | MeSH descriptor: [Ventricular Dysfunction, Left] explode all trees                                                                                                                                                                                                                                                                                                                                                                                                | 1988    |
| 7     | ((heart:ti,ab OR ventricular:ti,ab) AND (disease:ti,ab OR dysfunction:ti,ab OR failure:ti,ab))                                                                                                                                                                                                                                                                                                                                                                    | 57 320  |
| 8     | OR/4-7                                                                                                                                                                                                                                                                                                                                                                                                                                                            | 60 144  |
| 9     | left:ti,ab                                                                                                                                                                                                                                                                                                                                                                                                                                                        | 46 240  |
| 10    | 8 AND 9                                                                                                                                                                                                                                                                                                                                                                                                                                                           | 14 510  |
| 11    | MeSH descriptor: [Atrasentan] explode all trees                                                                                                                                                                                                                                                                                                                                                                                                                   | 39      |
| 12    | MeSH descriptor: [Bosentan] explode all trees                                                                                                                                                                                                                                                                                                                                                                                                                     | 190     |
| 13    | MeSH descriptor: [Endothelin Receptor Antagonists] explode all trees                                                                                                                                                                                                                                                                                                                                                                                              | 275     |
| 14    | A127722:ti,ab OR A147627:ti,ab OR A192621:ti,ab OR ABT627:ti,ab OR Ambrisentan:ti,ab OR Atrasentan:ti,ab OR Bosentan:ti,ab OR BQ-123:ti,ab OR BQ-788:ti,ab OR BSF208075:ti,ab OR "cyclo(D-Trp-D-Asp-Pro-D-Val-Leu)":ti,ab OR "endothelin receptor antagonists":ti,ab OR GSK1325760A:ti,ab OR Letairis:ti,ab OR LU208075:ti,ab OR macitentan:ti,ab OR opsumit:ti,ab OR "Ro 470203":ti,ab OR Sitaxentan:ti,ab OR Tracleer:ti,ab OR Xinlay:ti,ab OR Zibotentan:ti,ab | 1075    |
| 15    | MeSH descriptor: [Phosphodiesterase 5 Inhibitors] explode all trees                                                                                                                                                                                                                                                                                                                                                                                               | 382     |
| 16    | MeSH descriptor: [Sildenafil Citrate] explode all trees                                                                                                                                                                                                                                                                                                                                                                                                           | 962     |
| 17    | MeSH descriptor: [Tadalafil] explode all trees                                                                                                                                                                                                                                                                                                                                                                                                                    | 431     |
| 18    | MeSH descriptor: [Vardenafil Dihydrochloride] explode all trees                                                                                                                                                                                                                                                                                                                                                                                                   | 174     |
| 19    | Acetildenafil:ti,ab OR Avanafil:ti,ab OR Cialis:ti,ab OR Desmethylsildenafil:ti,ab OR Homosildenafil:ti,ab OR Hydroxyhomosildenafil:ti,ab OR IC351:ti,ab OR Levitra:ti,ab OR NCX911:ti,ab OR "PDE5":ti,ab OR "PDE5 inhibitors":ti,ab OR "phosphodiesterase type 5 inhibitors":ti,ab OR Revatio:ti,ab OR Sildenafil:ti,ab OR Staxyn:ti,ab OR Stendra:ti,ab OR Tadalafil:ti,ab OR "UK 9248010":ti,ab OR Vardenafil:ti,ab OR Viagra:ti,ab                            | 3344    |
| 20    | MeSH descriptor: [Soluble Guanylyl Cyclase] explode all trees                                                                                                                                                                                                                                                                                                                                                                                                     | 14      |
| 21    | adempas:ti,ab OR cinaciguat:ti,ab OR "guanylate cyclase":ti,ab OR riociguat:ti,ab OR vericiguat:ti,ab OR verquvo:ti,ab                                                                                                                                                                                                                                                                                                                                            | 415     |
| 22    | MeSH descriptor: [Epoprostenol] explode all trees                                                                                                                                                                                                                                                                                                                                                                                                                 | 527     |
| 23    | MeSH descriptor: [Iloprost] explode all trees                                                                                                                                                                                                                                                                                                                                                                                                                     | 224     |
| 24    | MeSH descriptor: [Receptors, Epoprostenol] explode all trees                                                                                                                                                                                                                                                                                                                                                                                                      | 9       |
| 25    | ciloprost:ti,ab OR flolan:ti,ab OR orenitram:ti,ab OR prostacyclin:ti,ab OR remodulin:ti,ab OR veletri:ti,ab OR ventavis:ti,ab                                                                                                                                                                                                                                                                                                                                    | 1184    |
| 26    | OR/11-25                                                                                                                                                                                                                                                                                                                                                                                                                                                          | 6140    |
| 27    | 3 AND 4 AND 10                                                                                                                                                                                                                                                                                                                                                                                                                                                    | 141     |

© ESC/ERS 2021

### 13.10. Literature search strategies for key narrative question 6

#### 13.10.1. Pubmed

Search date: 12 April 2021

| Set # | Search strategy                                                                                                                                                                                                                                                                                                                                                                                                                                                   | Results |
|-------|-------------------------------------------------------------------------------------------------------------------------------------------------------------------------------------------------------------------------------------------------------------------------------------------------------------------------------------------------------------------------------------------------------------------------------------------------------------------|---------|
| 1     | "Hypertension, Pulmonary"[Mesh]                                                                                                                                                                                                                                                                                                                                                                                                                                   | 39 397  |
| 2     | pulmonary[tiab] AND hypertensi*[tiab]                                                                                                                                                                                                                                                                                                                                                                                                                             | 58 338  |
| 3     | 1 OR 2                                                                                                                                                                                                                                                                                                                                                                                                                                                            | 65 794  |
| 4     | "Pulmonary Disease, Chronic Obstructive"[Mesh]                                                                                                                                                                                                                                                                                                                                                                                                                    | 57 844  |
| 5     | "Chronic Obstructive Pulmonary Disease"[tiab] OR COPD[tiab]                                                                                                                                                                                                                                                                                                                                                                                                       | 67 781  |
| 6     | 4 OR 5                                                                                                                                                                                                                                                                                                                                                                                                                                                            | 88 997  |
| 7     | "Atrasentan"[Mesh] OR "Bosentan"[Mesh] OR "Endothelin Receptor Antagonists"[Mesh]                                                                                                                                                                                                                                                                                                                                                                                 | 5883    |
| 8     | "Endothelin Receptor Antagonists"[Pharmacological Action]                                                                                                                                                                                                                                                                                                                                                                                                         | 5901    |
| 9     | "A 192621"[Supplementary Concept] OR "ambrisentan"[Supplementary Concept] OR "BQ 788"[Supplementary Concept] OR "cyclo(Trp-Asp-Pro-Val-Leu)"[Supplementary Concept] OR "macitentan"[Supplementary Concept] OR "ZD4054"[Supplementary Concept]                                                                                                                                                                                                                     | 2205    |
| 10    | A127722[tiab] OR A147627[tiab] OR A192621[tiab] OR ABT627[tiab] OR Ambrisentan[tiab] OR Atrasentan[tiab] OR Bosentan[tiab] OR BQ-123[tiab] OR BQ-788[tiab] OR BSF208075[tiab] OR "cyclo(D-Trp-D-Asp-Pro-D-Val-Leu)"[tiab] OR "endothelin receptor antagonists"[tiab] OR GSK1325760A[tiab] OR Letairis[tiab] OR LU208075[tiab] OR macitentan[tiab] OR opsumit[tiab] OR "Ro 470203"[tiab] OR Sitaxentan[tiab] OR Tracleer[tiab] OR Xinlay[tiab] OR Zibotentan[tiab] | 5558    |
| 11    | OR/7-10                                                                                                                                                                                                                                                                                                                                                                                                                                                           | 8350    |
| 12    | "Phosphodiesterase 5 Inhibitors"[Mesh] OR "Sildenafil Citrate"[Mesh] OR "Tadalafil"[Mesh] OR "Vardenafil Dihydrochloride"[Mesh]                                                                                                                                                                                                                                                                                                                                   | 8411    |
| 13    | "Phosphodiesterase 5 Inhibitors" [Pharmacological Action]                                                                                                                                                                                                                                                                                                                                                                                                         | 8485    |
| 14    | "avanafil" [Supplementary Concept]                                                                                                                                                                                                                                                                                                                                                                                                                                | 59      |
| 15    | Acetildenafil[tiab] OR Avanafil[tiab] OR Cialis[tiab] OR Desmethylsildenafil[tiab] OR Homosildenafil[tiab] OR Hydroxyhomosildenafil[tiab] OR IC351[tiab] OR Levitra[tiab] OR NCX911[tiab] OR "PDE5I"[tiab] OR "PDE5 inhibitors"[tiab] OR "phosphodiesterase type 5 inhibitors"[tiab] OR Revatio[tiab] OR Sildenafil[tiab] OR Staxyn[tiab] OR Stendra[tiab] OR Tadalafil[tiab] OR "UK 9248010"[tiab] OR Vardenafil[tiab] OR Viagra[tiab]                           | 10 470  |
| 16    | OR/12-15                                                                                                                                                                                                                                                                                                                                                                                                                                                          | 12 090  |
| 17    | "Soluble Guanylyl Cyclase"[Mesh]                                                                                                                                                                                                                                                                                                                                                                                                                                  | 1147    |
| 18    | "BAY 58-2667" [Supplementary Concept] OR "riociguat" [Supplementary Concept] OR "SgcA protein, Dictyostelium discoideum" [Supplementary Concept] OR "vericiguat" [Supplementary Concept]                                                                                                                                                                                                                                                                          | 313     |

Continued

|    |                                                                                                                                |        |
|----|--------------------------------------------------------------------------------------------------------------------------------|--------|
| 19 | adempas[tiab] OR cinaciguat[tiab] OR "guanylate cyclase"[tiab] OR riociguat[tiab] OR vericiguat[tiab] OR verquvo[tiab]         | 7874   |
| 20 | OR/17-19                                                                                                                       | 8518   |
| 21 | "Epoprostenol"[Mesh] OR "Iloprost"[Mesh] OR "Receptors, Epoprostenol"[Mesh]                                                    | 14 245 |
| 22 | "treprostiniil" [Supplementary Concept]                                                                                        | 366    |
| 23 | ciloprost[tiab] OR flolan[tiab] OR orenitram[tiab] OR prostacyclin[tiab] OR remodulin[tiab] OR veletri[tiab] OR ventavis[tiab] | 14 391 |
| 24 | OR/21-23                                                                                                                       | 20 053 |
| 25 | 11 OR 16 OR 20 OR 24                                                                                                           | 46 639 |
| 26 | 3 AND 6 AND 25                                                                                                                 | 134    |
| 27 | English[lang]                                                                                                                  | NA     |
| 28 | 26 AND 27                                                                                                                      | 122    |
| 29 | 1990/1/1:3000/12/31[pdat]                                                                                                      | NA     |
| 30 | 28 AND 29                                                                                                                      | 120    |

© ESC/ERS 2022

### 13.10.2. Cochrane

Search date: 12 April 2021

| Set # | Search strategy                                                                                                                                                                                                                                                                                                                                                                                                                                                   | Results |
|-------|-------------------------------------------------------------------------------------------------------------------------------------------------------------------------------------------------------------------------------------------------------------------------------------------------------------------------------------------------------------------------------------------------------------------------------------------------------------------|---------|
| 1     | MeSH descriptor: [Hypertension, Pulmonary] explode all trees                                                                                                                                                                                                                                                                                                                                                                                                      | 1194    |
| 2     | pulmonary:ti,ab AND hypertensi*:ti,ab                                                                                                                                                                                                                                                                                                                                                                                                                             | 4586    |
| 3     | 1 OR 2                                                                                                                                                                                                                                                                                                                                                                                                                                                            | 4743    |
| 4     | MeSH descriptor: [Pulmonary Disease, Chronic Obstructive] explode all trees                                                                                                                                                                                                                                                                                                                                                                                       | 5855    |
| 5     | "Chronic Obstructive Pulmonary Disease":ti OR COPD:ti                                                                                                                                                                                                                                                                                                                                                                                                             | 15 260  |
| 6     | 4 OR 5                                                                                                                                                                                                                                                                                                                                                                                                                                                            | 16 651  |
| 7     | MeSH descriptor: [Atrasentan] explode all trees                                                                                                                                                                                                                                                                                                                                                                                                                   | 39      |
| 8     | MeSH descriptor: [Bosentan] explode all trees                                                                                                                                                                                                                                                                                                                                                                                                                     | 190     |
| 9     | MeSH descriptor: [Endothelin Receptor Antagonists] explode all trees                                                                                                                                                                                                                                                                                                                                                                                              | 275     |
| 10    | A127722:ti,ab OR A147627:ti,ab OR A192621:ti,ab OR ABT627:ti,ab OR Ambrisentan:ti,ab OR Atrasentan:ti,ab OR Bosentan:ti,ab OR BQ-123:ti,ab OR BQ-788:ti,ab OR BSF208075:ti,ab OR "cyclo(D-Trp-D-Asp-Pro-D-Val-Leu)":ti,ab OR "endothelin receptor antagonists":ti,ab OR GSK1325760A:ti,ab OR Letairis:ti,ab OR LU208075:ti,ab OR macitentan:ti,ab OR opsumit:ti,ab OR "Ro 470203":ti,ab OR Sitaxentan:ti,ab OR Tracleer:ti,ab OR Xinlay:ti,ab OR Zibotentan:ti,ab | 1075    |
| 11    | MeSH descriptor: [Phosphodiesterase 5 Inhibitors] explode all trees                                                                                                                                                                                                                                                                                                                                                                                               | 382     |
| 12    | MeSH descriptor: [Sildenafil Citrate] explode all trees                                                                                                                                                                                                                                                                                                                                                                                                           | 962     |
| 13    | MeSH descriptor: [Tadalafil] explode all trees                                                                                                                                                                                                                                                                                                                                                                                                                    | 431     |
| 14    | MeSH descriptor: [Vardenafil Dihydrochloride] explode all trees                                                                                                                                                                                                                                                                                                                                                                                                   | 174     |
| 15    | Acetildenafil:ti,ab OR Avanafil:ti,ab OR Cialis:ti,ab OR Desmethylsildenafil:ti,ab OR Homosildenafil:ti,ab OR Hydroxyhomosildenafil:ti,ab OR IC351:ti,ab OR Levitra:ti,ab OR NCX911:ti,ab OR "PDE5":ti,ab OR "PDE5 inhibitors":ti,ab OR "phosphodiesterase type 5 inhibitors":ti,ab OR                                                                                                                                                                            | 3344    |

Continued

|    |                                                                                                                                                 |      |
|----|-------------------------------------------------------------------------------------------------------------------------------------------------|------|
|    | Revatio:ti,ab OR Sildenafil:ti,ab OR Staxyn:ti,ab OR Stendra:ti,ab OR Tadalafil:ti,ab OR "UK 9248010":ti,ab OR Vardenafil:ti,ab OR Viagra:ti,ab |      |
| 16 | MeSH descriptor: [Soluble Guanylyl Cyclase] explode all trees                                                                                   | 14   |
| 17 | adempas:ti,ab OR cinaciguat:ti,ab OR "guanylate cyclase":ti,ab OR riociguat:ti,ab OR vericiguat:ti,ab OR verquvo:ti,ab                          | 415  |
| 18 | MeSH descriptor: [Epoprostenol] explode all trees                                                                                               | 527  |
| 19 | MeSH descriptor: [Iloprost] explode all trees                                                                                                   | 224  |
| 20 | MeSH descriptor: [Receptors, Epoprostenol] explode all trees                                                                                    | 9    |
| 21 | ciloprost:ti,ab OR flolan:ti,ab OR orenitram:ti,ab OR prostacyclin:ti,ab OR remodulin:ti,ab OR veletri:ti,ab OR ventavis:ti,ab                  | 1184 |
| 22 | OR/7-21                                                                                                                                         | 6140 |
| 23 | 3 AND 6 AND 22                                                                                                                                  | 50   |

© ESC/ERS 2022

### 13.11. Literature search strategies for key narrative question 7

#### 13.11.1. Pubmed

Search date: 12 April 2021

| Set # | Search strategy                                                                                                                                                                                                                                                                                                                                                                                                                                                   | Results |
|-------|-------------------------------------------------------------------------------------------------------------------------------------------------------------------------------------------------------------------------------------------------------------------------------------------------------------------------------------------------------------------------------------------------------------------------------------------------------------------|---------|
| 1     | "Hypertension, Pulmonary"[Mesh]                                                                                                                                                                                                                                                                                                                                                                                                                                   | 37 397  |
| 2     | pulmonary[tiab] AND hypertensi*[tiab]                                                                                                                                                                                                                                                                                                                                                                                                                             | 58 338  |
| 3     | 1 OR 2                                                                                                                                                                                                                                                                                                                                                                                                                                                            | 65 794  |
| 4     | "Lung Diseases, Interstitial"[Mesh]                                                                                                                                                                                                                                                                                                                                                                                                                               | 57 008  |
| 5     | (interstitial[tiab] AND lung[tiab]) OR "idiopathic pulmonary fibrosis"[tiab]                                                                                                                                                                                                                                                                                                                                                                                      | 30 364  |
| 6     | 4 OR 5                                                                                                                                                                                                                                                                                                                                                                                                                                                            | 78 946  |
| 7     | "Atrasentan"[Mesh] OR "Bosentan"[Mesh] OR "Endothelin Receptor Antagonists"[Mesh]                                                                                                                                                                                                                                                                                                                                                                                 | 5883    |
| 8     | "Endothelin Receptor Antagonists"[Pharmacological Action]                                                                                                                                                                                                                                                                                                                                                                                                         | 5901    |
| 9     | "A 192621"[Supplementary Concept] OR "ambrisentan"[Supplementary Concept] OR "BQ 788"[Supplementary Concept] OR "cyclo(Trp-Asp-Pro-Val-Leu)"[Supplementary Concept] OR "macitentan"[Supplementary Concept] OR "ZD4054"[Supplementary Concept]                                                                                                                                                                                                                     | 2205    |
| 10    | A127722[tiab] OR A147627[tiab] OR A192621[tiab] OR ABT627[tiab] OR Ambrisentan[tiab] OR Atrasentan[tiab] OR Bosentan[tiab] OR BQ-123[tiab] OR BQ-788[tiab] OR BSF208075[tiab] OR "cyclo(D-Trp-D-Asp-Pro-D-Val-Leu)"[tiab] OR "endothelin receptor antagonists"[tiab] OR GSK1325760A[tiab] OR Letairis[tiab] OR LU208075[tiab] OR macitentan[tiab] OR opsumit[tiab] OR "Ro 470203"[tiab] OR Sitaxentan[tiab] OR Tracleer[tiab] OR Xinlay[tiab] OR Zibotentan[tiab] | 5558    |
| 11    | OR/9-12                                                                                                                                                                                                                                                                                                                                                                                                                                                           | 8350    |
| 12    | "Soluble Guanylyl Cyclase"[Mesh]                                                                                                                                                                                                                                                                                                                                                                                                                                  | 1147    |
| 13    | "BAY 58-2667"[Supplementary Concept] OR "riociguat"[Supplementary Concept] OR "SgcA protein, Dictyostelium"                                                                                                                                                                                                                                                                                                                                                       | 313     |

Continued

|    |                                                                                                                                |        |
|----|--------------------------------------------------------------------------------------------------------------------------------|--------|
|    | discoideum"[Supplementary Concept] OR "vericiguat"[Supplementary Concept]                                                      |        |
| 14 | adempas[tiab] OR cinaciguat[tiab] OR "guanylate cyclase"[tiab] OR riociguat[tiab] OR vericiguat[tiab] OR verquvo[tiab]         | 7874   |
| 15 | OR/19-21                                                                                                                       | 8518   |
| 16 | "Epoprostenol"[Mesh] OR "Iloprost"[Mesh] OR "Receptors, Epoprostenol"[Mesh]                                                    | 14 245 |
| 17 | "treprostinil"[Supplementary Concept]                                                                                          | 366    |
| 18 | ciloprost[tiab] OR flolan[tiab] OR orenitram[tiab] OR prostacyclin[tiab] OR remodulin[tiab] OR veletri[tiab] OR ventavis[tiab] | 14 391 |
| 19 | OR/23-25                                                                                                                       | 20 053 |
| 20 | 11 OR 15 OR 19                                                                                                                 | 35 938 |
| 21 | 3 AND 6 AND 20                                                                                                                 | 147    |
| 22 | English[lang]                                                                                                                  | NA     |
| 23 | 21 AND 22                                                                                                                      | 133    |
| 24 | 1990/1/1:3000/12/31[pdat]                                                                                                      | NA     |
| 25 | 23 AND 24                                                                                                                      | 131    |

© ESC/ERS 2022

### 13.11.2. Cochrane

Search date: 12 April 2021

| Set # | Search strategy                                                                                                                                                                                                                                                                                                                                                                                                                                                     | Results |
|-------|---------------------------------------------------------------------------------------------------------------------------------------------------------------------------------------------------------------------------------------------------------------------------------------------------------------------------------------------------------------------------------------------------------------------------------------------------------------------|---------|
| 1     | MeSH descriptor: [Hypertension, Pulmonary] explode all trees                                                                                                                                                                                                                                                                                                                                                                                                        | 1194    |
| 2     | pulmonary:ti,ab AND hypertensi*:ti,ab                                                                                                                                                                                                                                                                                                                                                                                                                               | 4586    |
| 3     | 1 OR 2                                                                                                                                                                                                                                                                                                                                                                                                                                                              | 4743    |
| 4     | MeSH descriptor: [Lung Diseases, Interstitial] explode all trees                                                                                                                                                                                                                                                                                                                                                                                                    | 781     |
| 5     | (interstitial:ti,ab AND lung:ti,ab) OR "idiopathic pulmonary fibrosis":ti,ab                                                                                                                                                                                                                                                                                                                                                                                        | 2231    |
| 6     | 4 OR 5                                                                                                                                                                                                                                                                                                                                                                                                                                                              | 2677    |
| 7     | MeSH descriptor: [Atrasentan] explode all trees                                                                                                                                                                                                                                                                                                                                                                                                                     | 39      |
| 8     | MeSH descriptor: [Bosentan] explode all trees                                                                                                                                                                                                                                                                                                                                                                                                                       | 190     |
| 9     | MeSH descriptor: [Endothelin Receptor Antagonists] explode all trees                                                                                                                                                                                                                                                                                                                                                                                                | 275     |
| 10    | A127722:ti,ab OR A147627:ti,ab OR A192621:ti,ab OR ABT627:ti,ab OR Ambrisentan:ti,ab OR Atrasentan:ti,ab OR Bosentan:ti,ab OR BQ-123:ti,ab OR BQ-788:ti,ab OR BSF208075:ti,ab OR "cyclo(D-Trp-D-Asp-Pro-D-Val-Leu)":ti,ab OR "endothelin receptor antagonists":ti,ab OR GSK1325760A:ti,ab OR Letairis:ti,ab OR LU208075:ti,ab OR macitentan:ti,ab OR opsumit:ti,ab OR "Ro 470203":ti,ab OR Sitaxentant:ti,ab OR Tracleer:ti,ab OR Xinlay:ti,ab OR Zibotentant:ti,ab | 1075    |
| 11    | MeSH descriptor: [Soluble Guanylyl Cyclase] explode all trees                                                                                                                                                                                                                                                                                                                                                                                                       | 14      |
| 12    | adempas:ti,ab OR cinaciguat:ti,ab OR "guanylate cyclase":ti,ab OR riociguat:ti,ab OR vericiguat:ti,ab OR verquvo:ti,ab                                                                                                                                                                                                                                                                                                                                              | 415     |
| 13    | MeSH descriptor: [Epoprostenol] explode all trees                                                                                                                                                                                                                                                                                                                                                                                                                   | 527     |
| 14    | MeSH descriptor: [Iloprost] explode all trees                                                                                                                                                                                                                                                                                                                                                                                                                       | 224     |
| 15    | MeSH descriptor: [Receptors, Epoprostenol] explode all trees                                                                                                                                                                                                                                                                                                                                                                                                        | 9       |

Continued

|    |                                                                                                                                |      |
|----|--------------------------------------------------------------------------------------------------------------------------------|------|
| 16 | ciloprost:ti,ab OR flolan:ti,ab OR orenitram:ti,ab OR prostacyclin:ti,ab OR remodulin:ti,ab OR veletri:ti,ab OR ventavis:ti,ab | 1189 |
| 17 | OR/7-16                                                                                                                        | 2950 |
| 18 | 3 AND 6 AND 17                                                                                                                 | 41   |

© ESC/ERS 2022

## 13.12. Literature search strategies for key narrative question 8

### 13.12.1. Pubmed

Search date: 12 April 2021

| Set # | Search strategy                                                                                                      | Results   |
|-------|----------------------------------------------------------------------------------------------------------------------|-----------|
| 1     | "Angioplasty, Balloon"[Mesh]                                                                                         | 53 390    |
| 2     | "balloon pulmonary angioplasty"[tiab]                                                                                | 348       |
| 3     | 1 OR 2                                                                                                               | 53 527    |
| 4     | "Drug Therapy"[Mesh]                                                                                                 | 1 393 014 |
| 5     | "drug therapy"[Subheading] OR "therapy"[Subheading]                                                                  | 7266 292  |
| 6     | "drug therap*"[tiab] OR "medical therap*"[tiab] OR "pulmonary vasodilator therap*"[tiab] OR "targeted therap*"[tiab] | 139 797   |
| 7     | OR/4-6                                                                                                               | 7 802 736 |
| 8     | "chronic thromboembolic pulmonary hypertension"[tiab] OR CTEPH[tiab] OR "residual pulmonary hypertension"[tiab]      | 2385      |
| 9     | 3 AND 7 AND 8                                                                                                        | 246       |
| 10    | English[lang]                                                                                                        | NA        |
| 11    | 9 AND 10                                                                                                             | 231       |
| 12    | 1990/1/1:3000/12/31[pdat]                                                                                            | NA        |
| 13    | 11 AND 12                                                                                                            | 231       |

© ESC/ERS 2022

### 13.12.2. Cochrane

Search date: 12 April 2021

| Set # | Search strategy                                                                                                      | Results |
|-------|----------------------------------------------------------------------------------------------------------------------|---------|
| 1     | MeSH descriptor: [Angioplasty, Balloon] explode all trees                                                            | 4117    |
| 2     | "balloon pulmonary angioplasty":ti,ab                                                                                | 24      |
| 3     | 1 OR 2                                                                                                               | 4138    |
| 4     | MeSH descriptor: [Drug Therapy] explode all trees                                                                    | 142 349 |
| 5     | Any MeSH descriptor in all MeSH products and with qualifier(s): [drug therapy - DT]                                  | 204 370 |
| NA    | Any MeSH descriptor in all MeSH products and with qualifier(s): [therapy - DT]                                       | 94 769  |
| 6     | "drug therap*":ti,ab OR "medical therap*":ti,ab OR "pulmonary vasodilator therap*":ti,ab OR "targeted therap*":ti,ab | 231 579 |
| 7     | OR/4-6                                                                                                               | 470 529 |
| 8     | "chronic thromboembolic pulmonary hypertension":ti,ab OR CTEPH:ti,ab OR "residual pulmonary hypertension":ti,ab      | 246     |
| 9     | 3 AND 7 AND 8                                                                                                        | 11      |

© ESC/ERS 2022

## 14. PRISMA diagrams

### 14.1. Prisma diagram PICO I

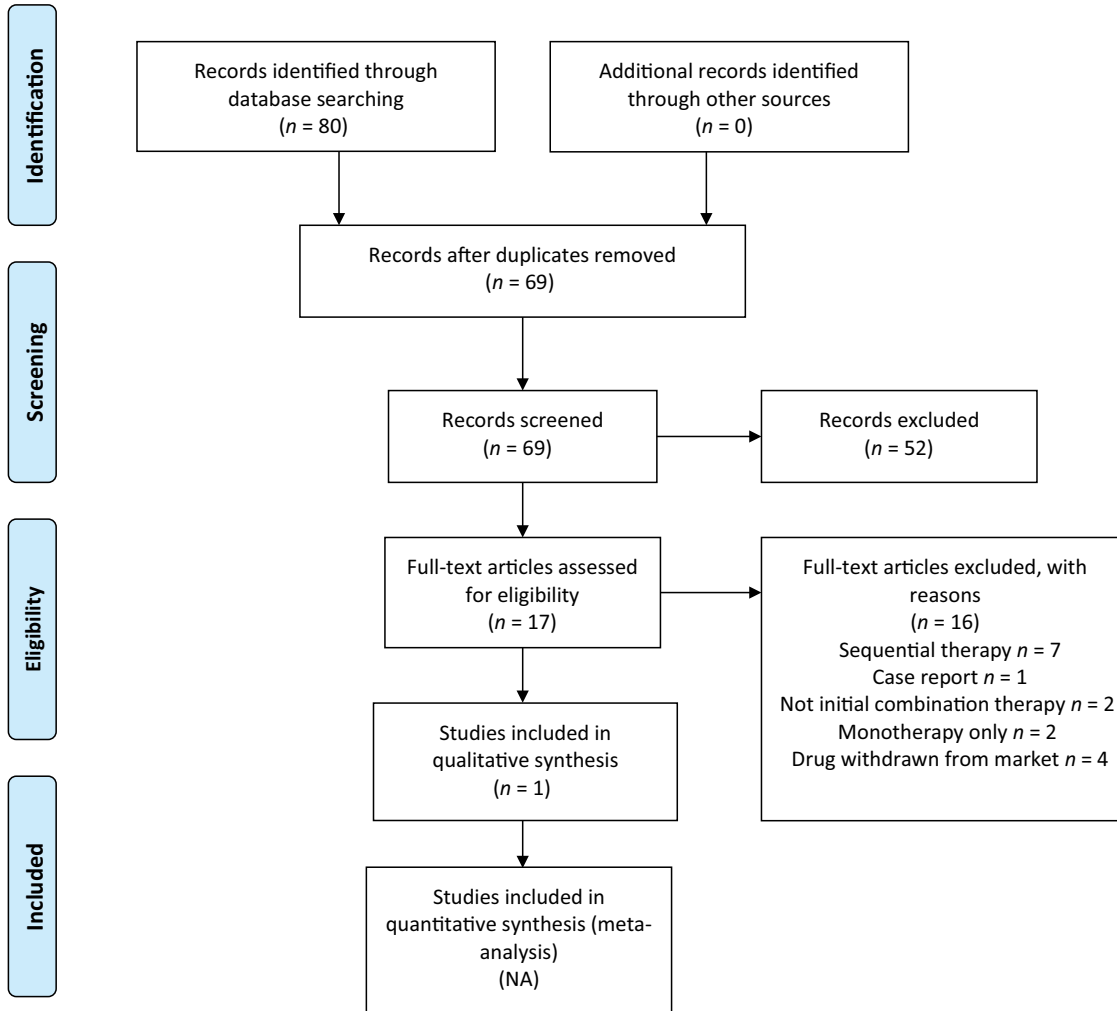

### 14.2. Prisma diagram PICO II

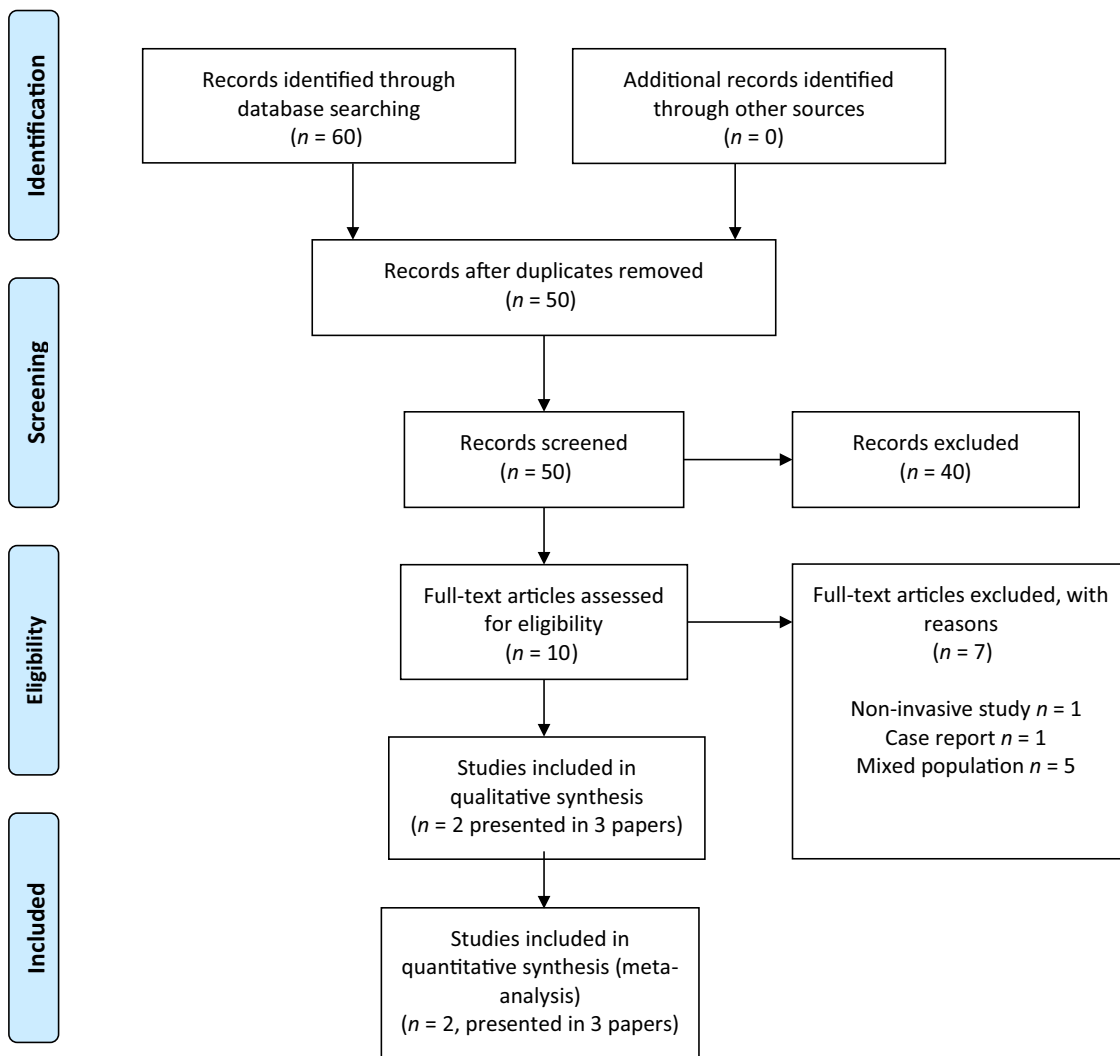

### 14.3. Prisma diagram PICO III

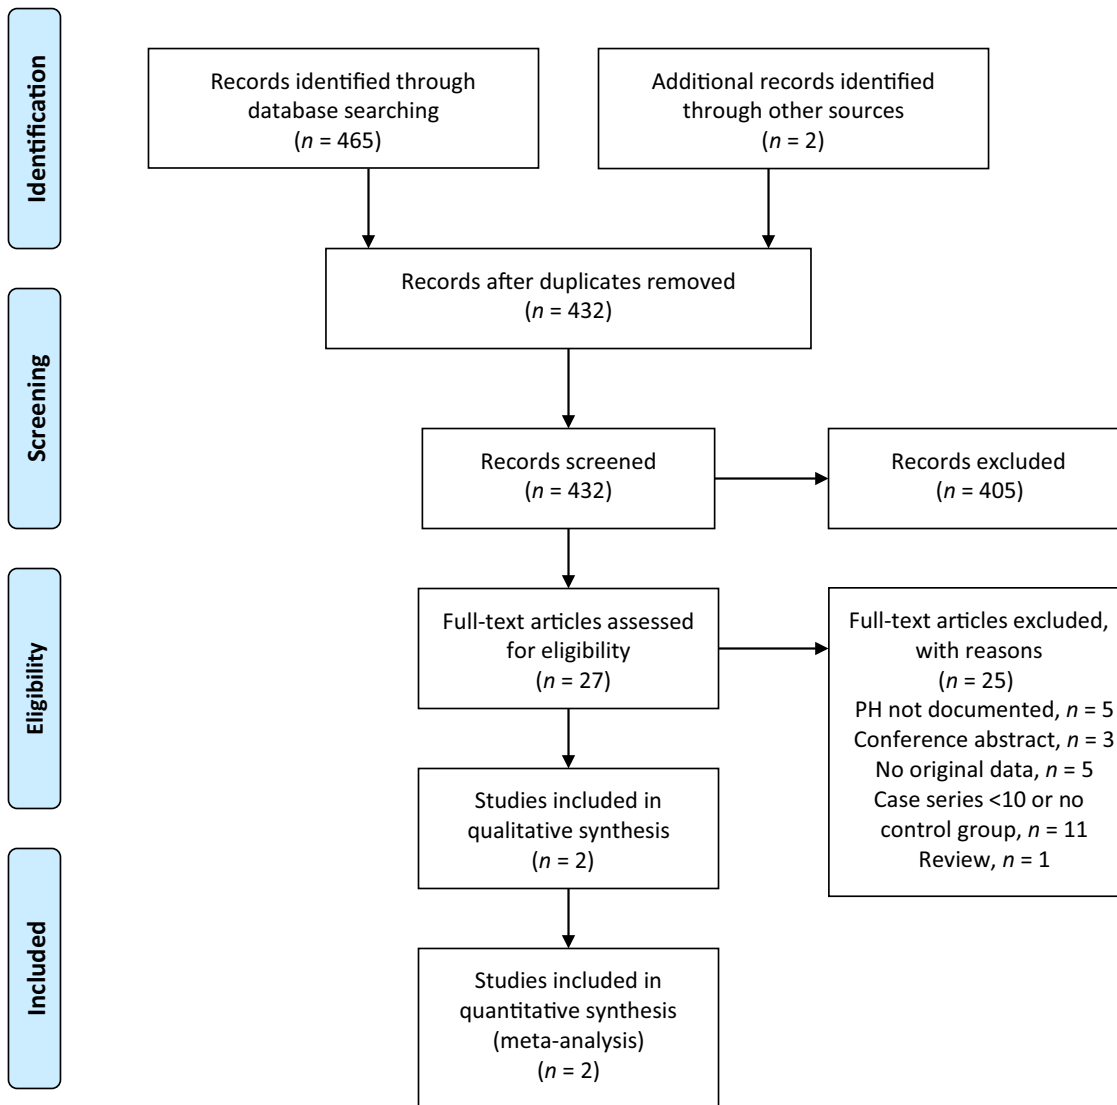

### 14.4. Prisma diagram PICO IV

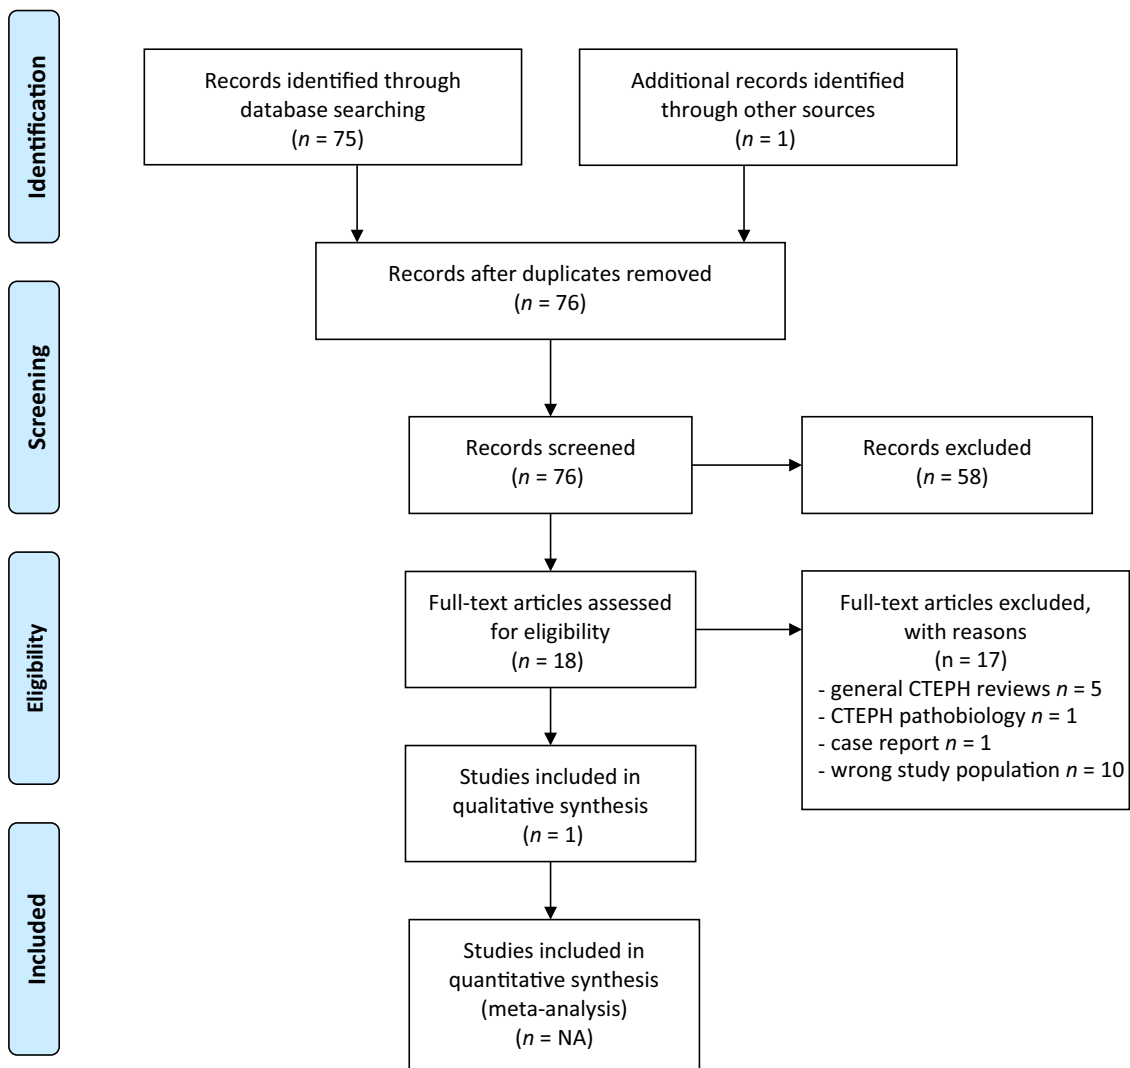

## 14.5. Prisma diagram key narrative question 1

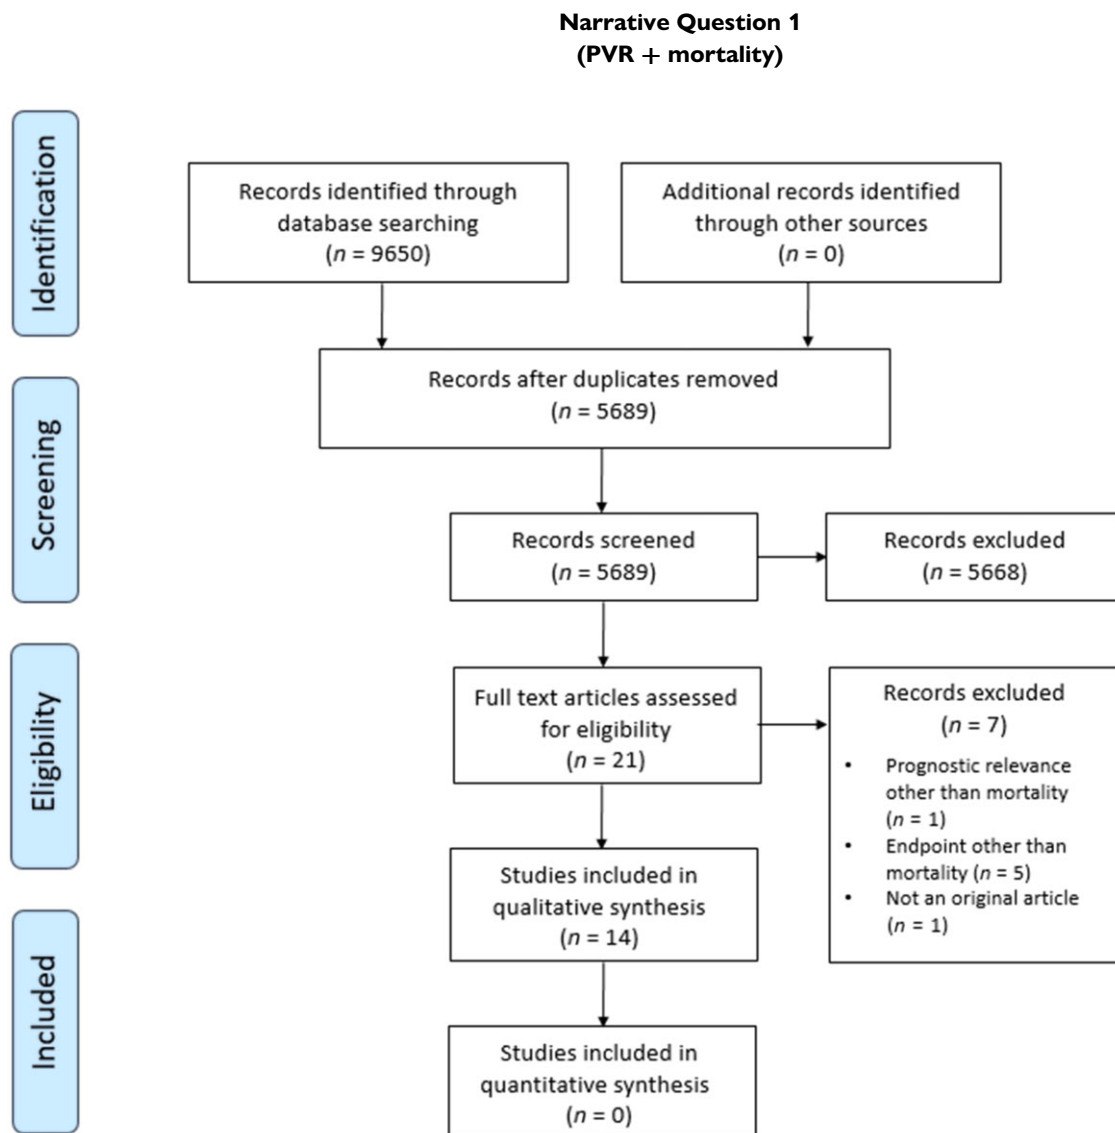



**Narrative Question 1  
(mPAP + mortality)**

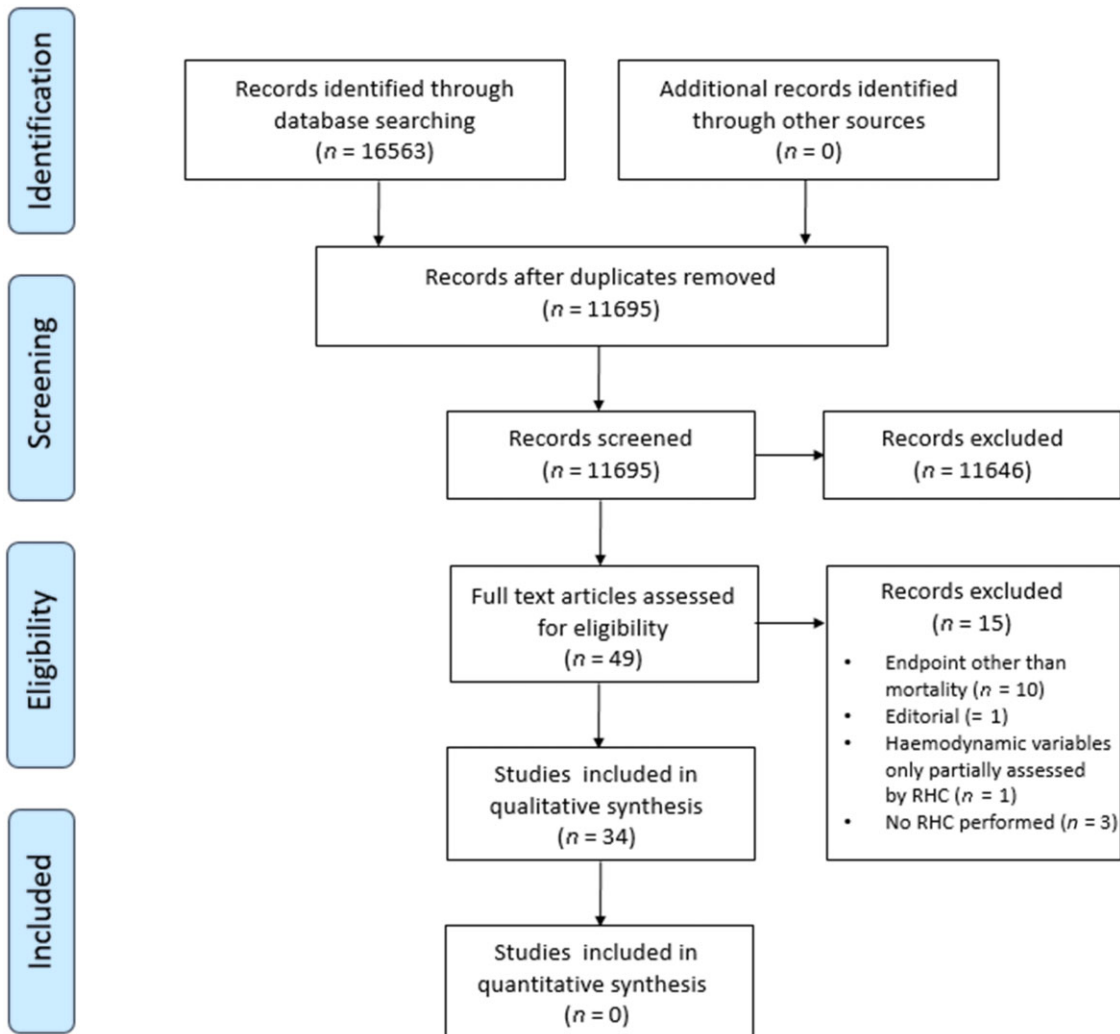

**Narrative Question 1  
(PAWP + mortality)**

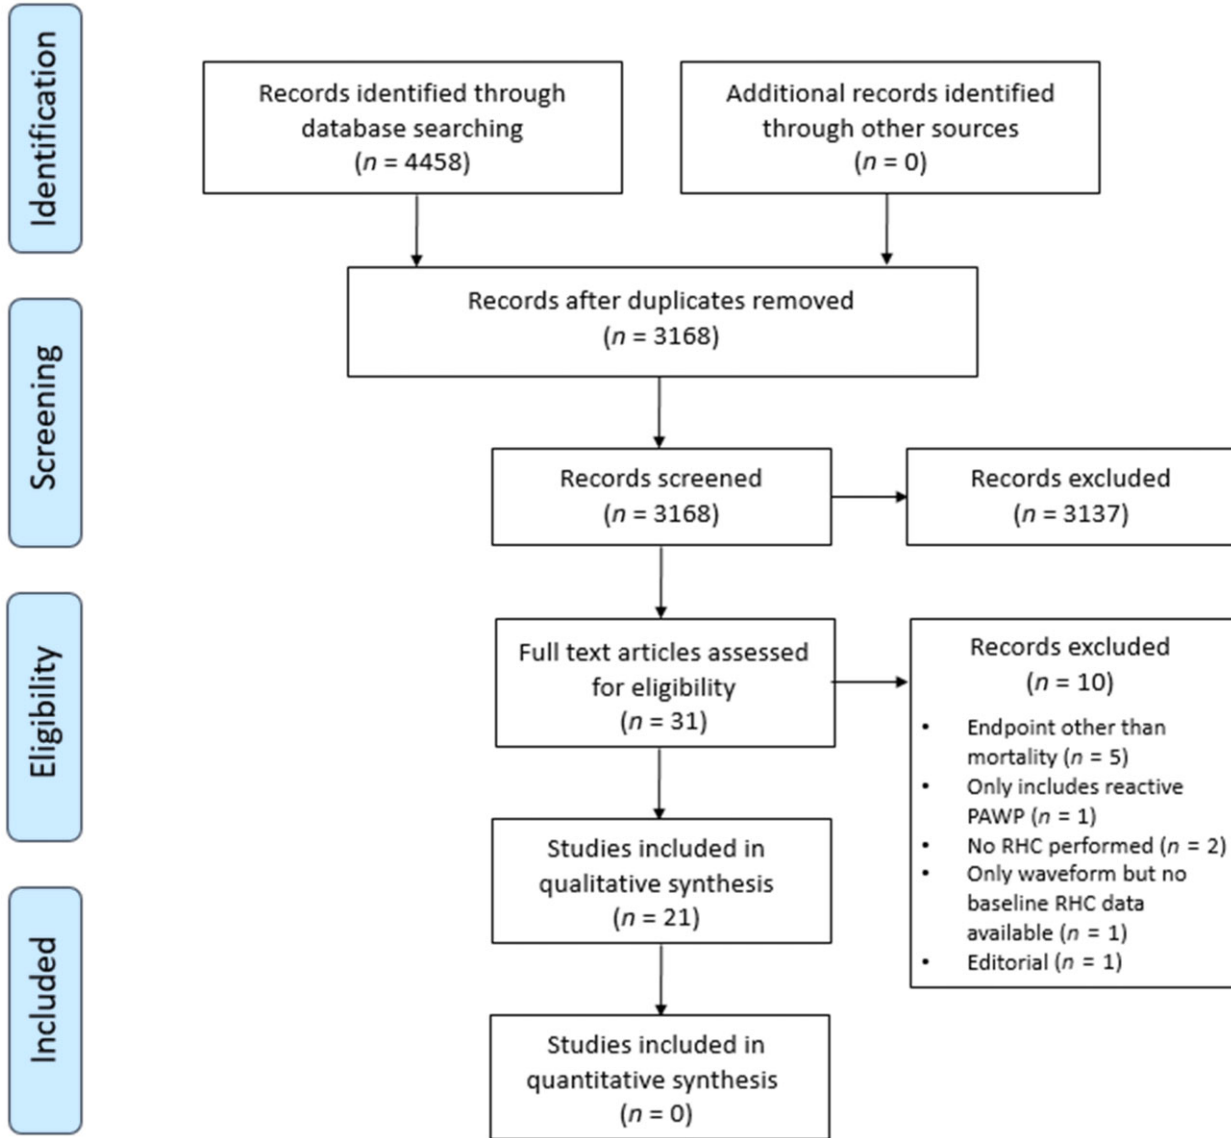

**Narrative Question 1  
(mPAP + normal values)**

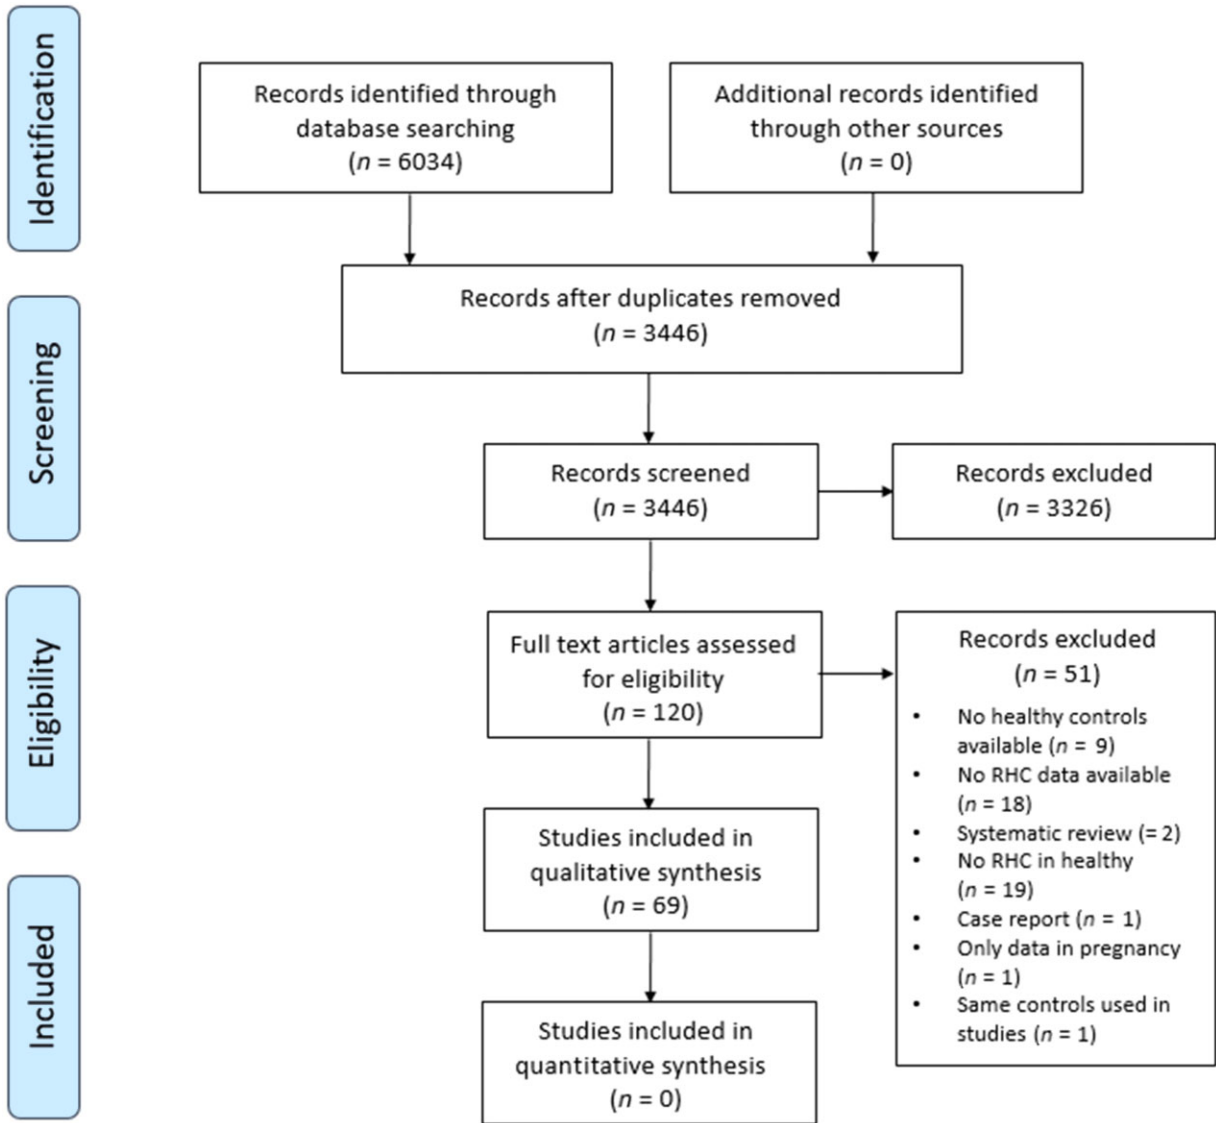

**Narrative Question 1  
(PAWP + normal values)**

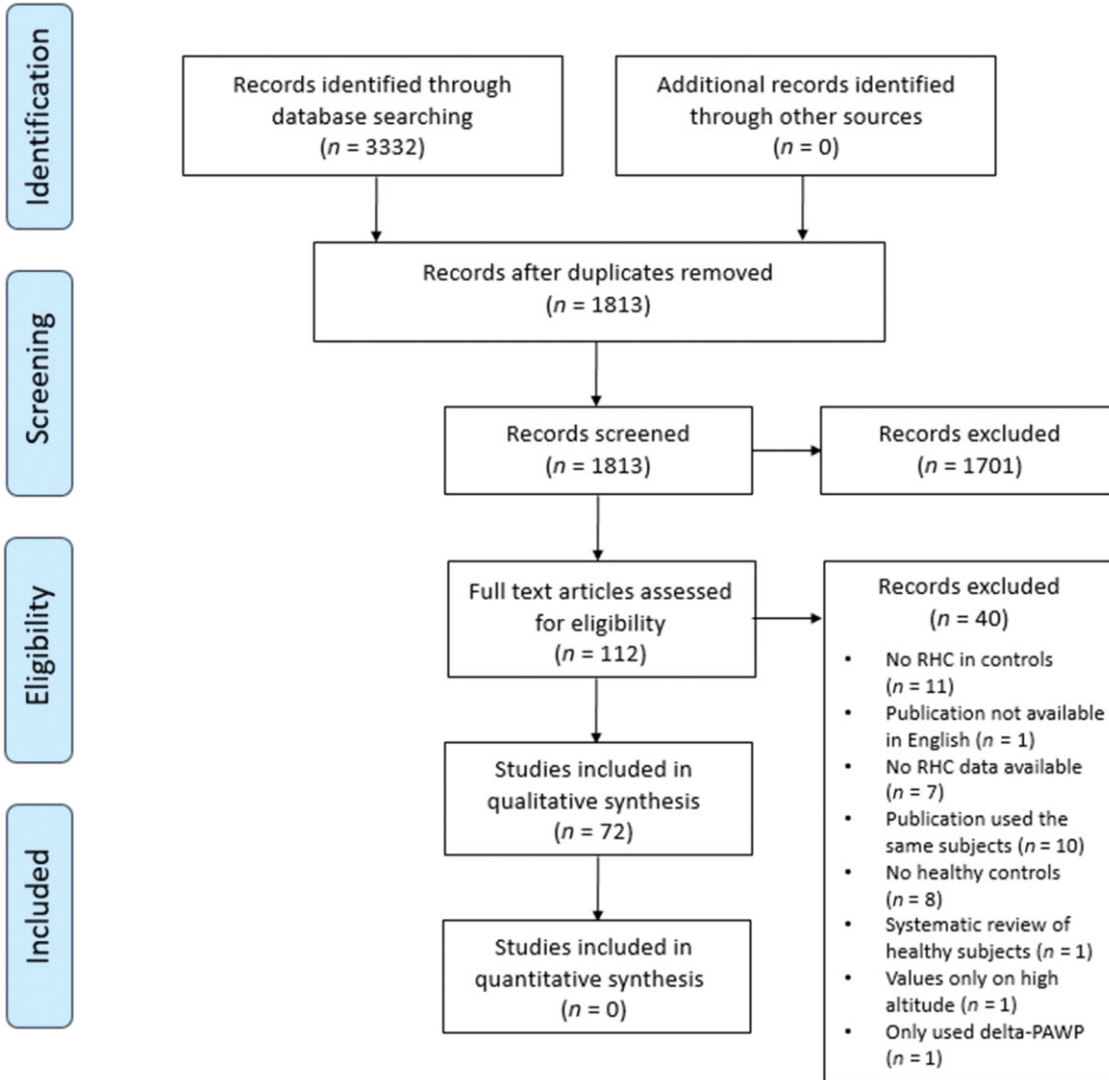

**Narrative Question 1  
(PVR + normal values)**

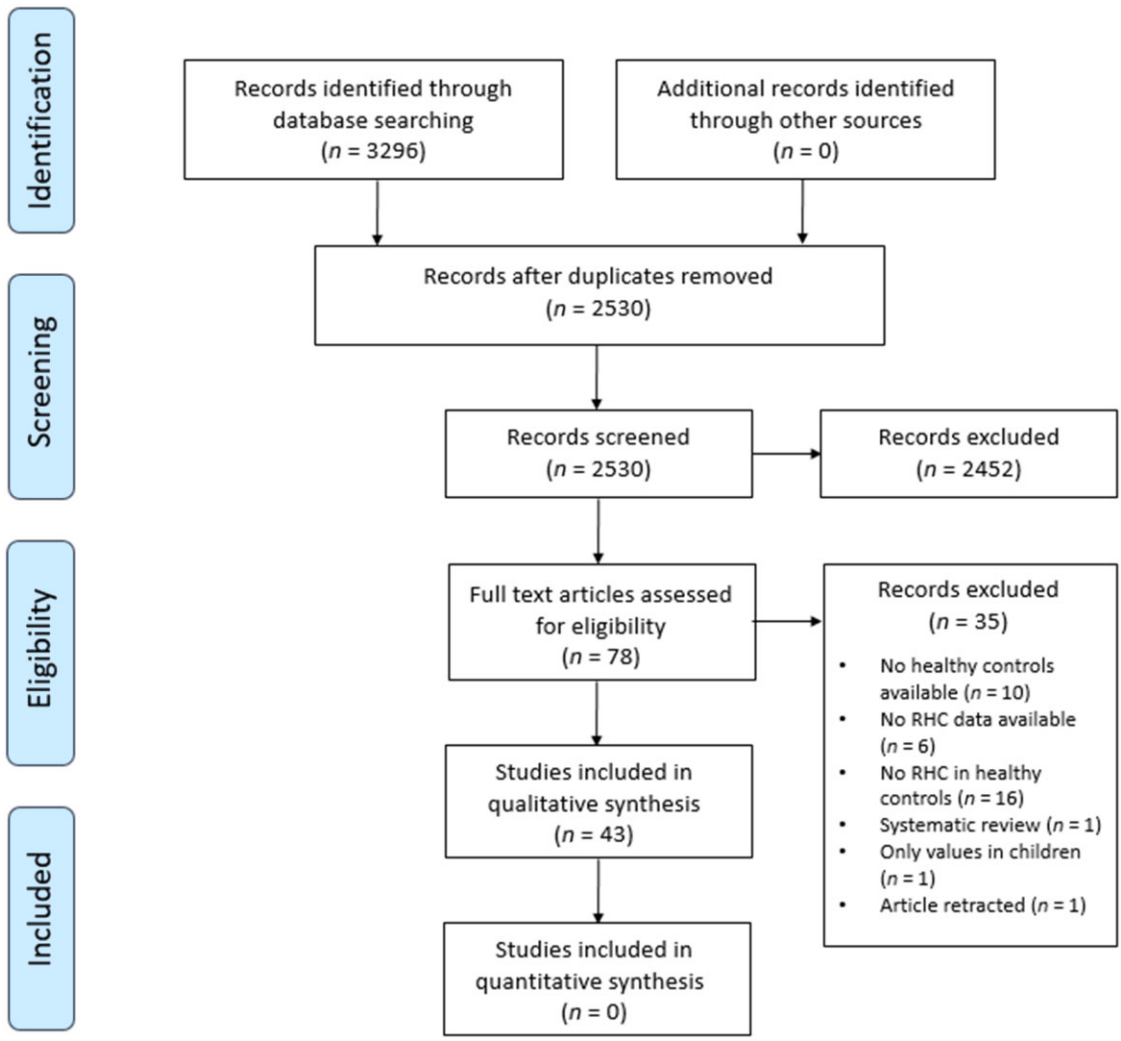

## 14.6. Prisma diagram key narrative question 2

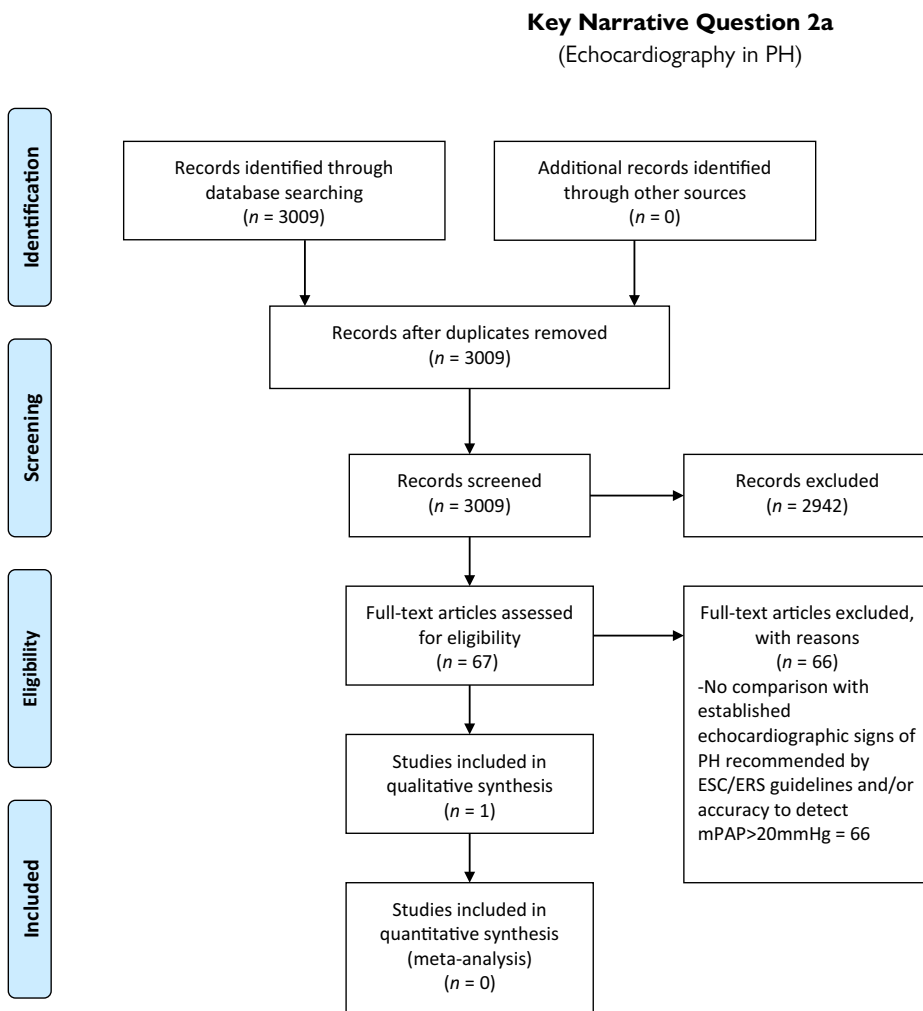

**Key Narrative Question 2b**  
(Cardiopulmonary exercise testing in PH)

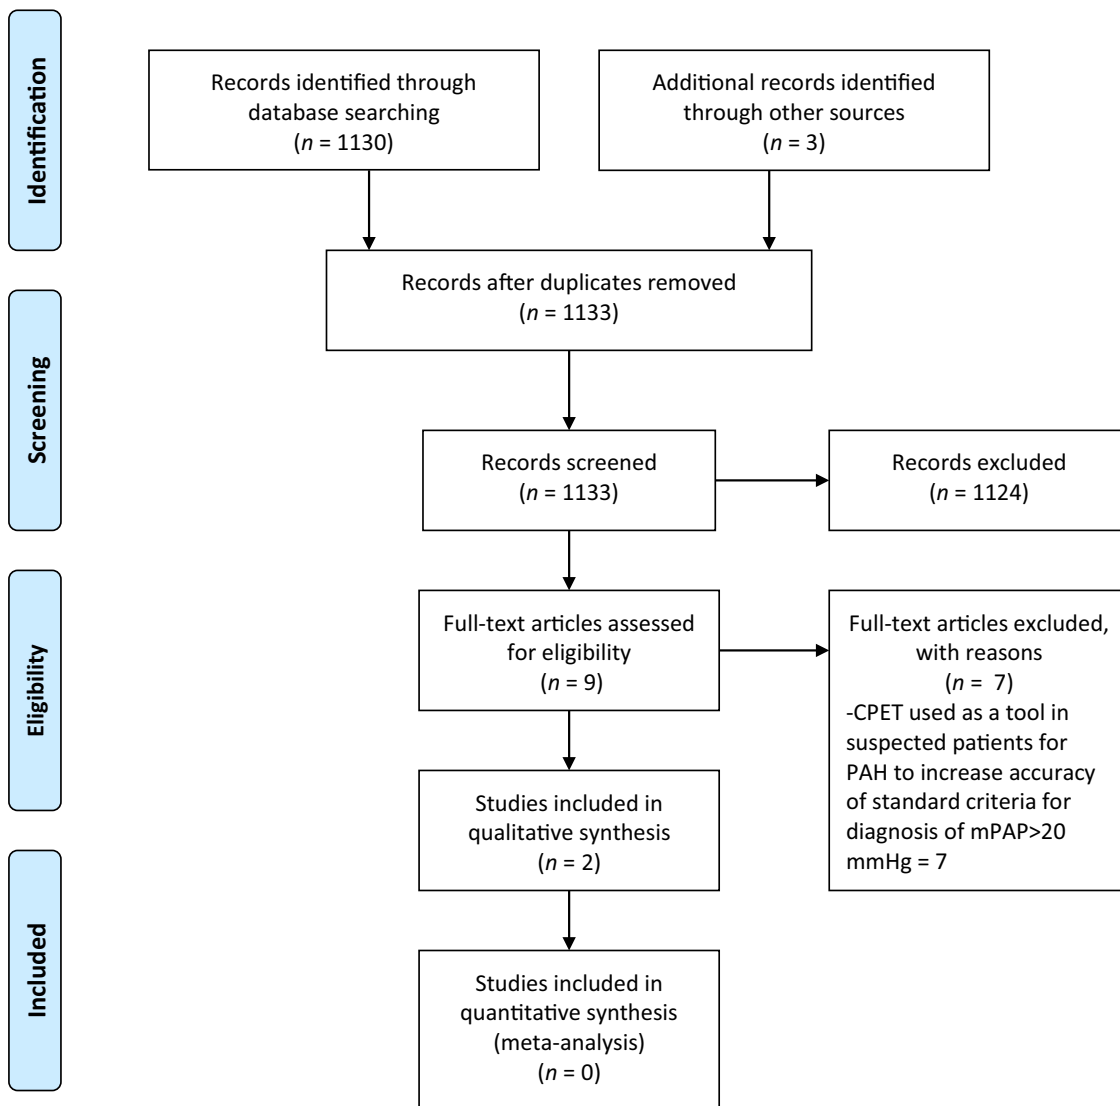

### 14.7. Prisma diagram key narrative question 3

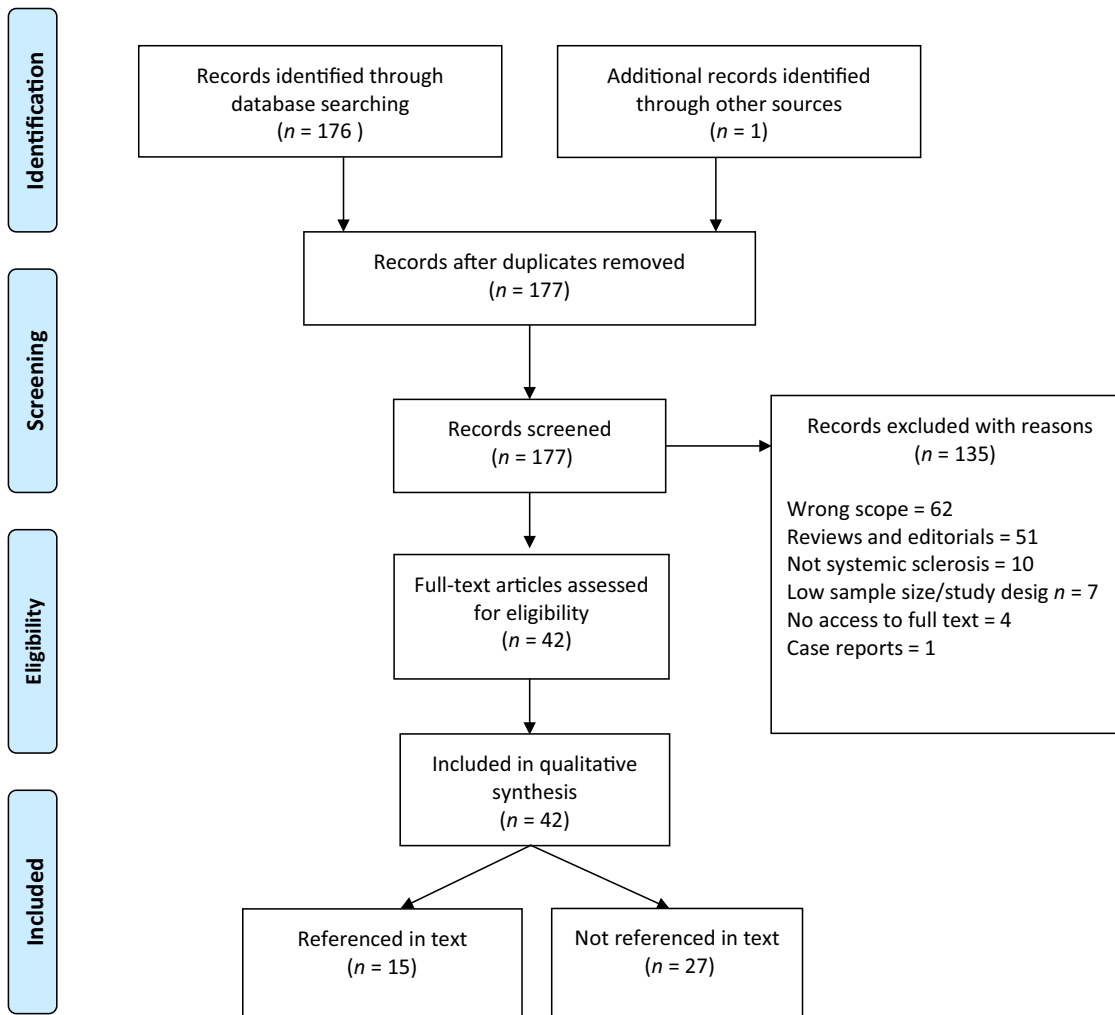



### 14.8. Prisma diagram key narrative question 4

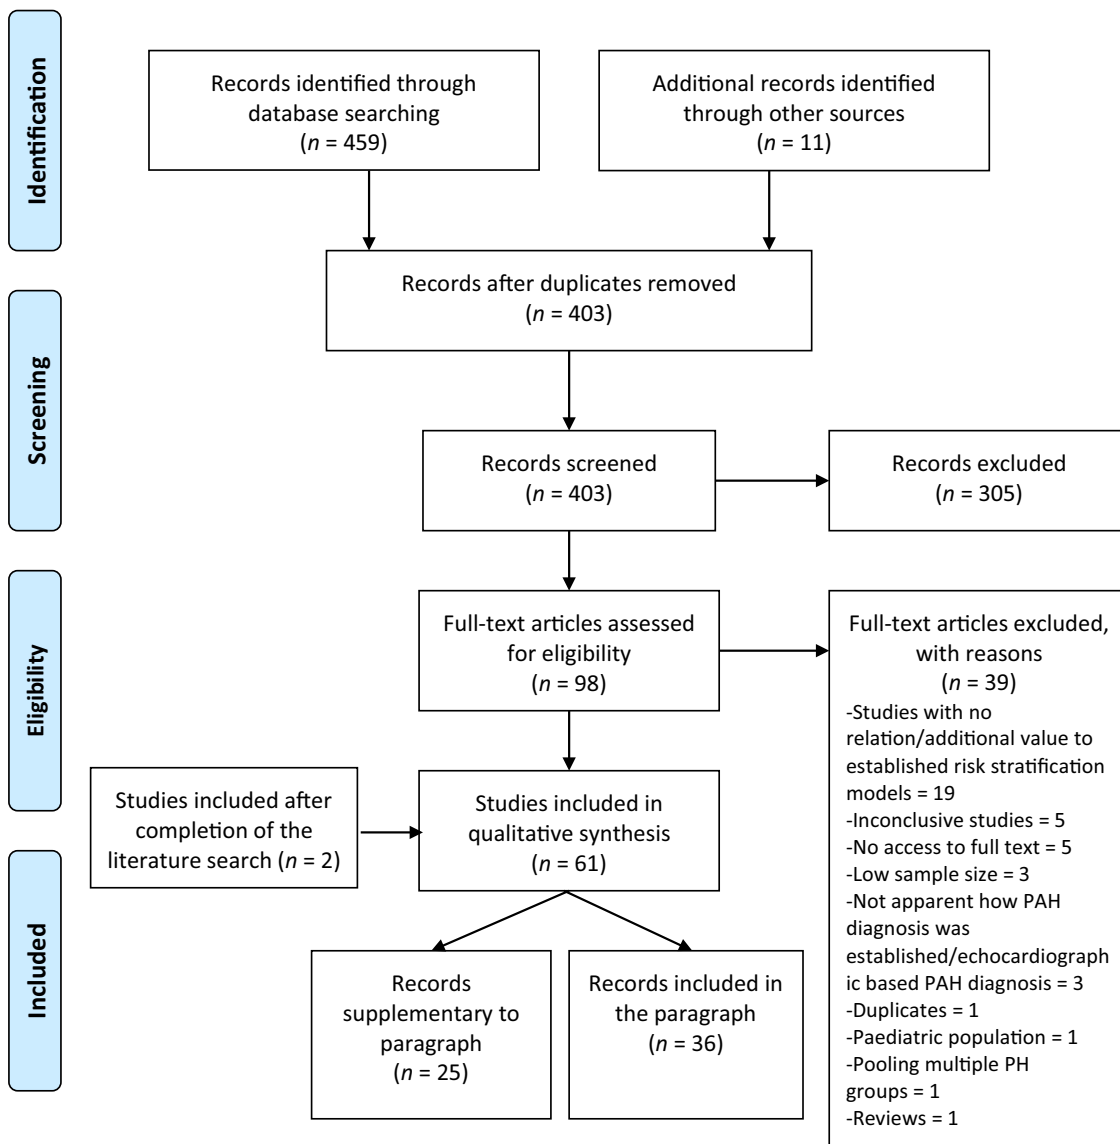

### 14.9. Prisma diagram key narrative question 5

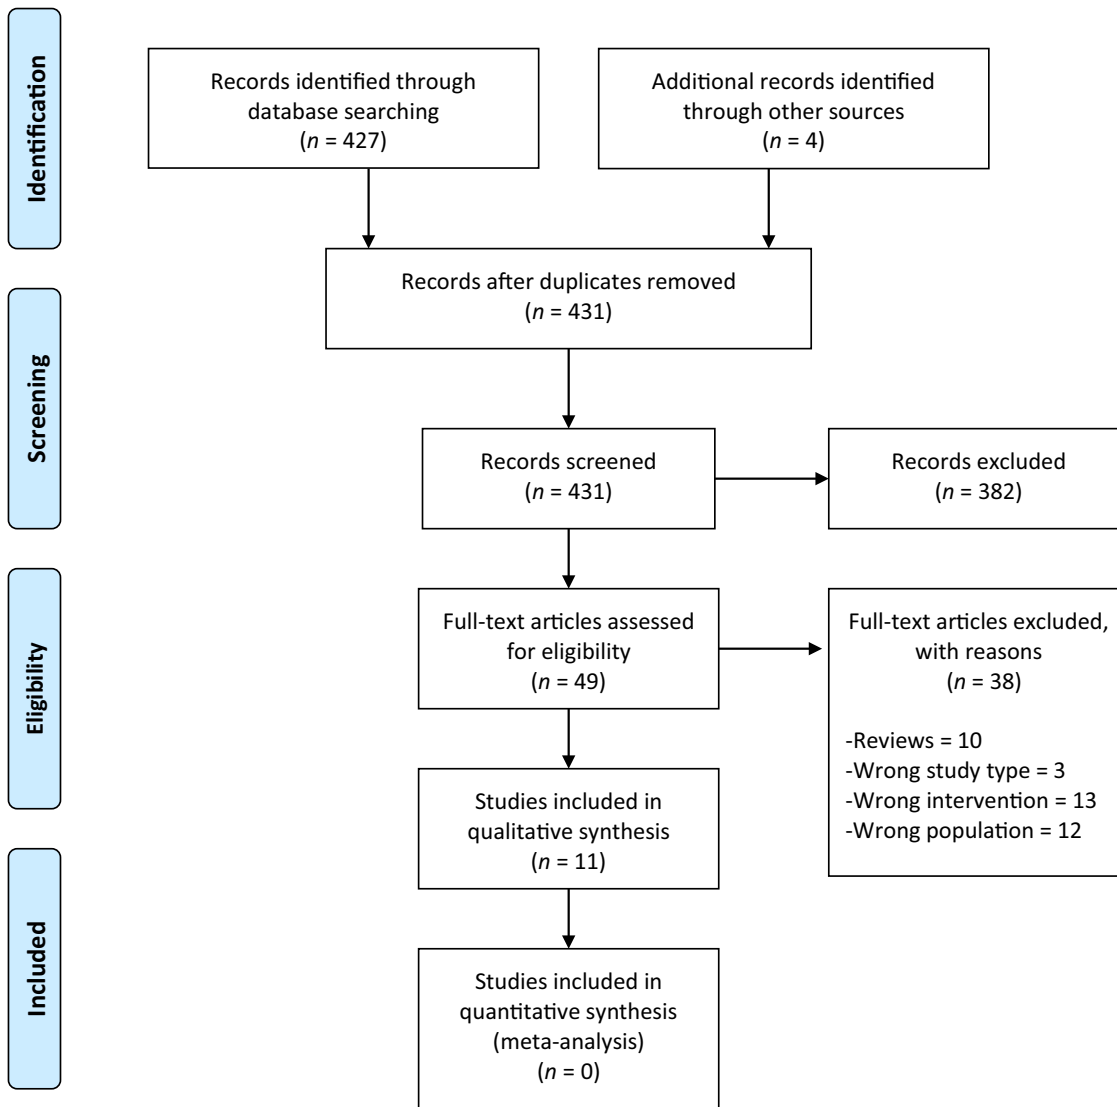

### 14.10. Prisma diagram key narrative question 6

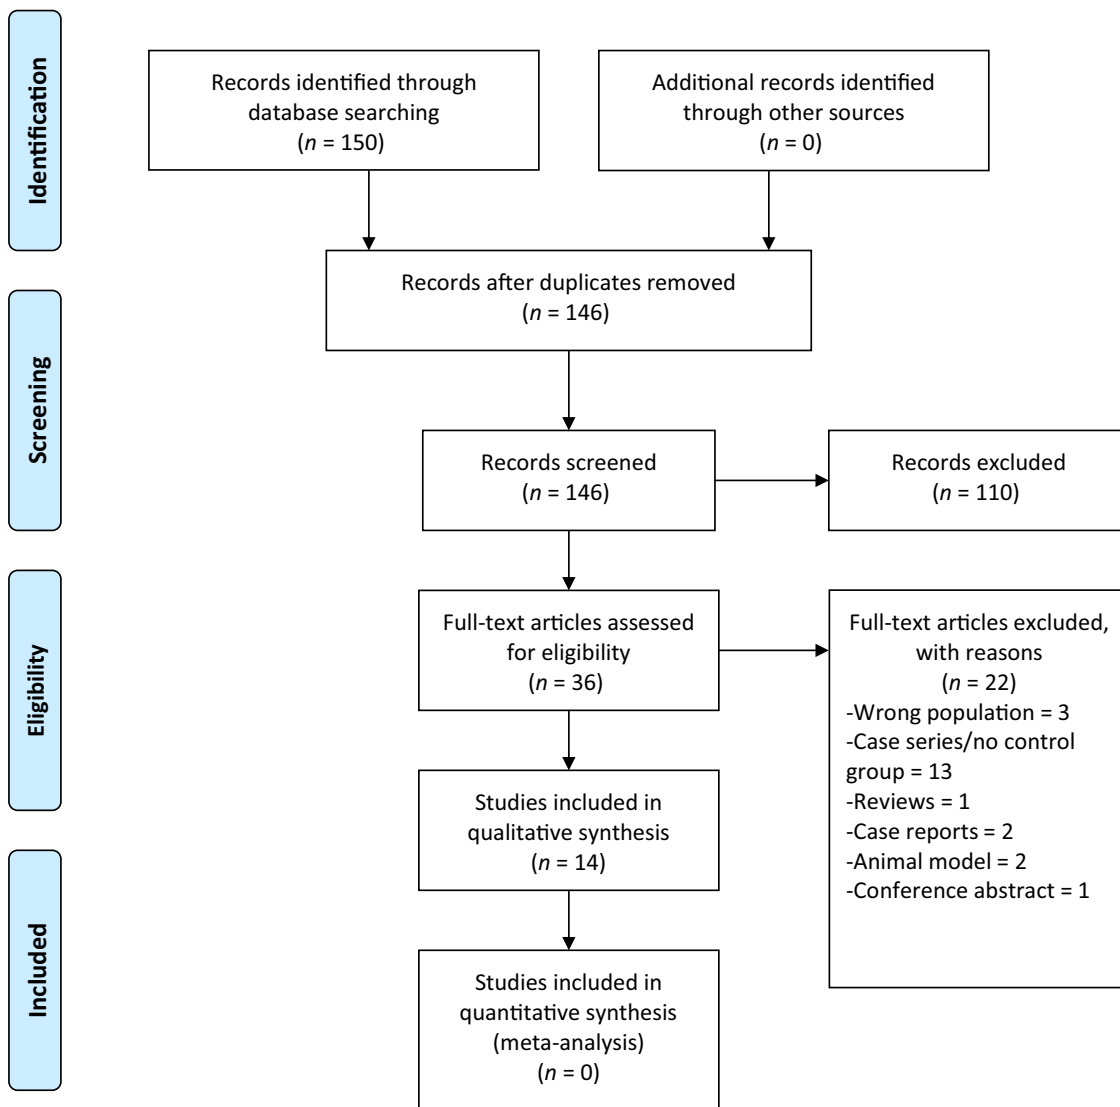

### 14.11. Prisma diagram key narrative question 7

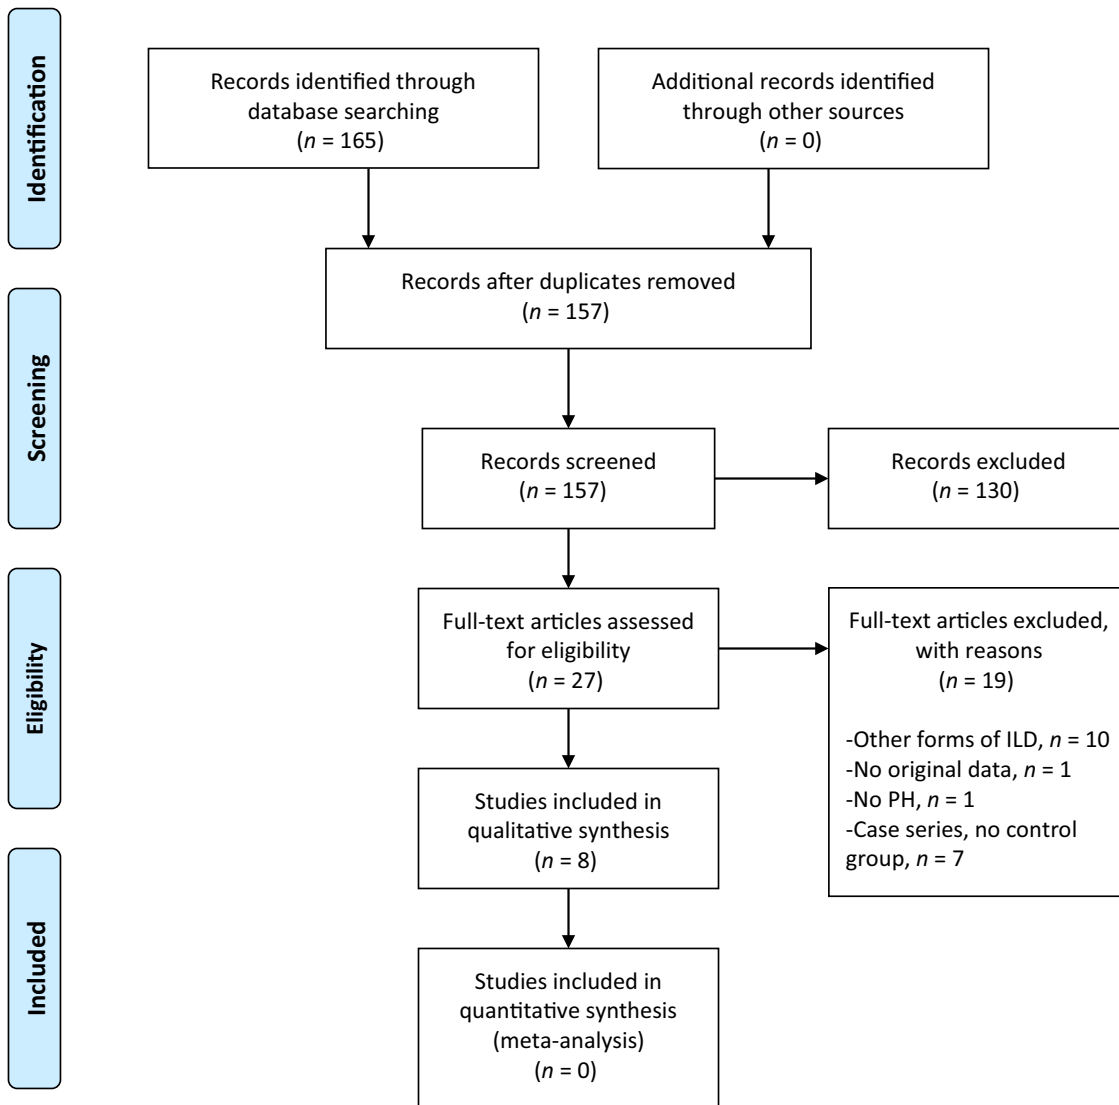

### 14.12. Prisma diagram key narrative question 8

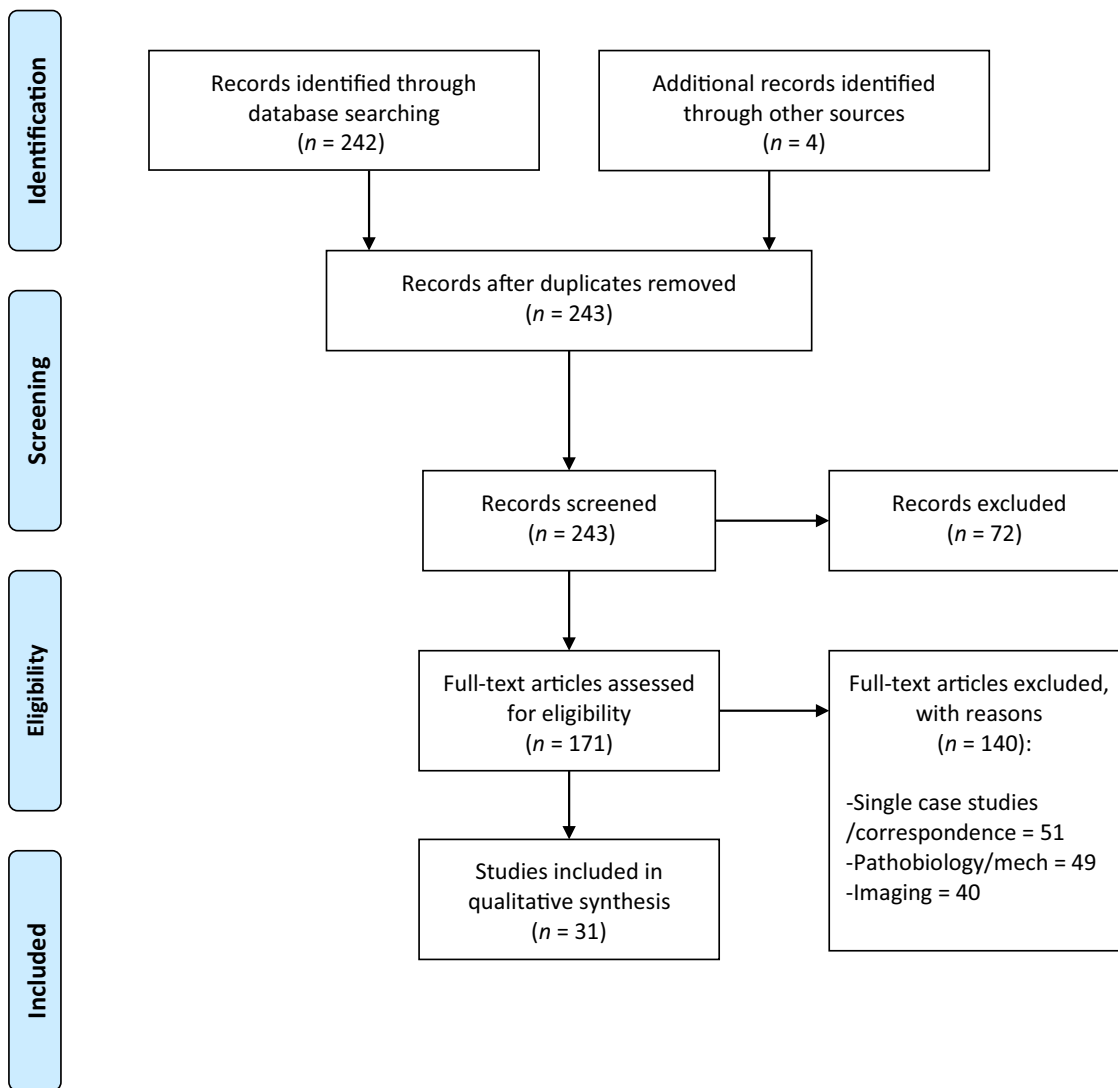

## 15. Guideline development tool (GDT) evidence profile

### 15.1. Guideline development tool evidence profile for PICO 1

**Question:** Should initial oral double-combination therapy vs. monotherapy be used in symptomatic patients with pulmonary arterial hypertension?

| No. of studies                                                     | Certainty assessment |                      |               |              |                            |                      |                                                                                                                                           | No. of patients            |                               | Effect                                                  |                  | Certainty | Importance |
|--------------------------------------------------------------------|----------------------|----------------------|---------------|--------------|----------------------------|----------------------|-------------------------------------------------------------------------------------------------------------------------------------------|----------------------------|-------------------------------|---------------------------------------------------------|------------------|-----------|------------|
|                                                                    | Study design         | Risk of bias         | Inconsistency | Indirectness | Imprecision                | Other considerations | Initial oral double combination therapy (ERAs and PDE5is)                                                                                 | Monotherapy (ERAs, PDE5is) | Relative [95% CI]             | Absolute [95% CI]                                       |                  |           |            |
| <b>Hospitalization</b>                                             |                      |                      |               |              |                            |                      |                                                                                                                                           |                            |                               |                                                         |                  |           |            |
| 1 <sup>203</sup>                                                   | randomized trials    | not serious          | not serious   | not serious  | serious <sup>a</sup>       | none                 | 10/253 (4.0%)                                                                                                                             | 30/247 (12.1%)             | <b>RR 0.33</b><br>[0.16–0.65] | <b>81 fewer per 1000</b> [from 102 fewer to 43 fewer]   | ⊕⊕⊕⊕<br>MODERATE | CRITICAL  |            |
| <b>Unsatisfactory long-term clinical response</b>                  |                      |                      |               |              |                            |                      |                                                                                                                                           |                            |                               |                                                         |                  |           |            |
| 1 <sup>203</sup>                                                   | randomized trials    | not serious          | not serious   | not serious  | very serious <sup>ab</sup> | none                 | 17/253 (6.7%)                                                                                                                             | 23/247 (9.3%)              | <b>RR 0.72</b><br>[0.40–1.32] | <b>26 fewer per 1000</b> [from 56 fewer to 30 more]     | ⊕⊕⊕⊕<br>LOW      | CRITICAL  |            |
| <b>Disease progression</b>                                         |                      |                      |               |              |                            |                      |                                                                                                                                           |                            |                               |                                                         |                  |           |            |
| 1 <sup>203</sup>                                                   | randomized trials    | not serious          | not serious   | not serious  | very serious <sup>ab</sup> | none                 | 10/253 (4.0%)                                                                                                                             | 11/247 (4.5%)              | <b>RR 0.61</b><br>[0.28–1.32] | <b>17 fewer per 100</b> [from 32 fewer to 14 more]      | ⊕⊕⊕⊕<br>LOW      | CRITICAL  |            |
| <b>Exercise capacity (assessed with 6-minute walking distance)</b> |                      |                      |               |              |                            |                      |                                                                                                                                           |                            |                               |                                                         |                  |           |            |
| 1 <sup>203</sup>                                                   | randomized trials    | not serious          | not serious   | not serious  | serious <sup>c</sup>       | none                 | 253                                                                                                                                       | 247                        | –                             | MD <b>25.18 m higher</b> [22.87 higher to 27.49 higher] | ⊕⊕⊕⊕<br>MODERATE | CRITICAL  |            |
| <b>Haemodynamic variables - not reported</b>                       |                      |                      |               |              |                            |                      |                                                                                                                                           |                            |                               |                                                         |                  |           |            |
| –                                                                  | –                    | –                    | –             | –            | –                          | –                    | –                                                                                                                                         | –                          | –                             | –                                                       | –                | IMPORTANT |            |
| <b>Cardiac biomarkers (assessed with NT-proBNP level)</b>          |                      |                      |               |              |                            |                      |                                                                                                                                           |                            |                               |                                                         |                  |           |            |
| 1 <sup>203</sup>                                                   | randomized trials    | serious <sup>d</sup> | not serious   | not serious  | serious <sup>c</sup>       | none                 | percentage change in geometric mean from baseline to week 24: Combination therapy (n = 253): –6.72<br>Monotherapy-pooled (n = 247): –50.4 | –                          | –                             | –                                                       | ⊕⊕⊕⊕<br>LOW      | IMPORTANT |            |

Continued

| Quality of life (assessed with improvement in WHO Functional Class at week 24)    |                   |             |             |             |                            |      |                 |                     |                                               |          |           |
|-----------------------------------------------------------------------------------|-------------------|-------------|-------------|-------------|----------------------------|------|-----------------|---------------------|-----------------------------------------------|----------|-----------|
| 1 <sup>203</sup>                                                                  | randomized trials | not serious | not serious | not serious | very serious <sup>ab</sup> | none | 81/244 (33.2%)  | RR 1.12 [0.88–1.43] | 40 more per 1000 [from 40 fewer to 143 more]  | ⊕⊕⊕⊕ LOW | IMPORTANT |
| Quality of life (assessed with no change in WHO Functional Class at week 24)      |                   |             |             |             |                            |      |                 |                     |                                               |          |           |
| 1 <sup>203</sup>                                                                  | randomized trials | not serious | not serious | not serious | very serious <sup>ab</sup> | none | 146/252 (57.9%) | RR 0.96 [0.83–1.11] | 24 fewer per 1000 [from 102 fewer to 66 more] | ⊕⊕⊕⊕ LOW | IMPORTANT |
| Quality of life (assessed with deterioration in WHO Functional Class at week 24)  |                   |             |             |             |                            |      |                 |                     |                                               |          |           |
| 1 <sup>203</sup>                                                                  | randomized trials | not serious | not serious | not serious | very serious <sup>ab</sup> | none | 12/252 (4.8%)   | RR 0.73 [0.35–1.50] | 18 fewer per 1000 [from 43 fewer to 33 more]  | ⊕⊕⊕⊕ LOW | IMPORTANT |
| Serious adverse events (including pulmonary hypertension, pneumonia)              |                   |             |             |             |                            |      |                 |                     |                                               |          |           |
| 1 <sup>203</sup>                                                                  | randomized trials | not serious | not serious | not serious | very serious <sup>ab</sup> | none | 92/253 (36.4%)  | RR 0.94 [0.75–1.19] | 23 fewer per 1000 [from 96 fewer to 73 more]  | ⊕⊕⊕⊕ LOW | IMPORTANT |
| Adverse events leading to discontinuation (including dyspnoea, peripheral oedema) |                   |             |             |             |                            |      |                 |                     |                                               |          |           |
| 1 <sup>203</sup>                                                                  | randomized trials | not serious | not serious | not serious | very serious <sup>ab</sup> | none | 31/253 (12.3%)  | RR 1.08 [0.67–1.75] | 9 more per 1000 [from 37 fewer to 85 more]    | ⊕⊕⊕⊕ LOW | IMPORTANT |
| Survival                                                                          |                   |             |             |             |                            |      |                 |                     |                                               |          |           |
| 1 <sup>204</sup>                                                                  | randomized trials | not serious | not serious | not serious | very serious <sup>ab</sup> | none | 29/302 (9.6%)   | HR 0.67 [0.42–1.08] | 42 fewer per 1000 [from 76 fewer to 10 more]  | ⊕⊕⊕⊕ LOW | NA        |

© ESC/ERS 2022

CI, confidence interval; RR, risk ratio; MD, mean difference; HR, hazard ratio; WHO, World Health Organization.

**Explanations**

<sup>a</sup>The small number of events did not meet optimal information size and suggested fragility of the estimate.

<sup>b</sup>The 95% CI included the potential for both meaningful benefit and meaningful harm.

<sup>c</sup>The small sample size suggested fragility of the estimate.

<sup>d</sup>Data were based on observed cases, with no imputation. A number of NT-proBNP samples were lost or could not be analysed. Analysis of NT-proBNP was performed on data from 204 participants in the combination therapy group and 199 in the pooled monotherapy group (99 in the ambrisentan-monotherapy group and 100 in the tadalafil-monotherapy group).

## 15.2. Guideline development tool evidence profile for PICO II

**Question:** Should phosphodiesterase type 5 inhibitors be used in patients with combined post- and pre-capillary pulmonary hypertension due to heart failure with preserved ejection fraction?

| No. of studies                                                                                                                                                                         | Certainty assessment |              |               |              |                           |                      |                                     | No. of patients                        |                      | Effect                                                    |          | Certainty | Importance |
|----------------------------------------------------------------------------------------------------------------------------------------------------------------------------------------|----------------------|--------------|---------------|--------------|---------------------------|----------------------|-------------------------------------|----------------------------------------|----------------------|-----------------------------------------------------------|----------|-----------|------------|
|                                                                                                                                                                                        | Study design         | Risk of bias | Inconsistency | Indirectness | Imprecision               | Other considerations | Phosphodiesterase type 5 inhibitors | No phosphodiesterase type 5 inhibitors | Relative [95% CI]    | Absolute [95% CI]                                         |          |           |            |
| <b>Mortality (follow-up: 12 weeks)</b>                                                                                                                                                 |                      |              |               |              |                           |                      |                                     |                                        |                      |                                                           |          |           |            |
| 1 <sup>205</sup>                                                                                                                                                                       | randomized trials    | not serious  | not serious   | not serious  | very serious <sup>a</sup> | none                 | 1/26 (3.8%)                         | 1/26 (3.8%)                            | RR 1.00 [0.07–15.15] | 0 fewer per 1000 [from 36 fewer to 544 more]              | ⊕⊕⊕⊕ LOW | CRITICAL  |            |
| <b>Cardiovascular morbidity (cardiac failure) (follow-up: 12 weeks)</b>                                                                                                                |                      |              |               |              |                           |                      |                                     |                                        |                      |                                                           |          |           |            |
| 1 <sup>205</sup>                                                                                                                                                                       | randomized trials    | not serious  | not serious   | not serious  | very serious <sup>a</sup> | none                 | 1/26 (3.8%)                         | 0/26 (0.0%)                            | RR 3.00 [0.13–70.42] | 39 more per 1000 [from 35 fewer to 112 more] <sup>b</sup> | ⊕⊕⊕⊕ LOW | CRITICAL  |            |
| <b>Hospitalization/clinical worsening – not reported</b>                                                                                                                               |                      |              |               |              |                           |                      |                                     |                                        |                      |                                                           |          |           |            |
| –                                                                                                                                                                                      | –                    | –            | –             | –            | –                         | –                    | –                                   | –                                      | –                    | –                                                         | –        | CRITICAL  |            |
| <b>Quality of life (follow-up: 12 weeks; assessed with Kansas City Cardiomyopathy Questionnaire)</b>                                                                                   |                      |              |               |              |                           |                      |                                     |                                        |                      |                                                           |          |           |            |
| 1 <sup>205</sup>                                                                                                                                                                       | randomized trials    | not serious  | not serious   | not serious  | very serious <sup>c</sup> | none                 | 26                                  | 26                                     | –                    | MD 17 lower [22.04 lower to 11.96 lower]                  | ⊕⊕⊕⊕ LOW | CRITICAL  |            |
| <b>Primary safety endpoint (composite: cardiac failure, intestinal infarction, death) (follow-up: 12 weeks)</b>                                                                        |                      |              |               |              |                           |                      |                                     |                                        |                      |                                                           |          |           |            |
| 1 <sup>205</sup>                                                                                                                                                                       | randomized trials    | not serious  | not serious   | not serious  | very serious <sup>a</sup> | none                 | 1/26 (3.8%)                         | 1/26 (3.8%)                            | RR 1.00 [0.07–15.15] | 0 fewer per 1000 [from 36 fewer to 544 more]              | ⊕⊕⊕⊕ LOW | CRITICAL  |            |
| <b>Non-study-specific severe adverse events (pneumonia, vascular pseudoaneurysm, medical device complication, elective surgery, respiratory tract infection) (follow-up: 12 weeks)</b> |                      |              |               |              |                           |                      |                                     |                                        |                      |                                                           |          |           |            |
| 1 <sup>205</sup>                                                                                                                                                                       | randomized trials    | not serious  | not serious   | not serious  | very serious <sup>a</sup> | none                 | 3/26 (11.5%)                        | 2/26 (7.7%)                            | RR 1.50 [0.27–8.25]  | 38 more per 1000 [from 56 fewer to 558 more]              | ⊕⊕⊕⊕ LOW | CRITICAL  |            |
| <b>Exercise capacity (follow-up: 12 months; assessed with forced expiratory volume in 1 second)</b>                                                                                    |                      |              |               |              |                           |                      |                                     |                                        |                      |                                                           |          |           |            |
| 1 <sup>206</sup>                                                                                                                                                                       | randomized trials    | not serious  | not serious   | not serious  | very serious <sup>c</sup> | none                 | 22                                  | 22                                     | –                    | MD 10 % predicted higher [7.32 higher to 12.68 higher]    | ⊕⊕⊕⊕ LOW | IMPORTANT |            |
| <b>Exercise capacity (follow-up: 12 weeks; assessed with peak oxygen consumption)</b>                                                                                                  |                      |              |               |              |                           |                      |                                     |                                        |                      |                                                           |          |           |            |
| 1 <sup>205</sup>                                                                                                                                                                       | randomized trials    | not serious  | not serious   | not serious  | very serious <sup>a</sup> | none                 | 26                                  | 26                                     | –                    | MD 0.6 mL/min/kg higher [0.06 lower to 2.16 higher]       | ⊕⊕⊕⊕ LOW | IMPORTANT |            |

Continued



| Echocardiography – pulmonary arterial pressure (follow-up: 12 weeks)                |                   |             |                      |             |                           |      |    |    |   |                                                           |          |           |
|-------------------------------------------------------------------------------------|-------------------|-------------|----------------------|-------------|---------------------------|------|----|----|---|-----------------------------------------------------------|----------|-----------|
| 2 <sup>205,206</sup>                                                                | randomized trials | not serious | serious <sup>d</sup> | not serious | serious <sup>c</sup>      | none | 48 | 48 | – | MD <b>17.29 mmHg lower</b> [19.54 lower to 15.05 lower]   | ⊕⊕⊕⊕ LOW | IMPORTANT |
| Echocardiography – right ventricular systolic pressure (follow-up: 12 weeks)        |                   |             |                      |             |                           |      |    |    |   |                                                           |          |           |
| 1 <sup>205</sup>                                                                    | randomized trials | not serious | not serious          | not serious | very serious <sup>c</sup> | none | 26 | 26 | – | MD <b>2 mmHg higher</b> [0.29 higher to 3.71 higher]      | ⊕⊕⊕⊕ LOW | IMPORTANT |
| Echocardiography – tricuspid annular plane systolic excursion (follow-up: 12 weeks) |                   |             |                      |             |                           |      |    |    |   |                                                           |          |           |
| 2 <sup>205,206</sup>                                                                | randomized trials | not serious | serious <sup>e</sup> | not serious | serious <sup>c</sup>      | none | 48 | 48 | – | MD <b>7.08 mm higher</b> [6.07 higher to 8.08 higher]     | ⊕⊕⊕⊕ LOW | IMPORTANT |
| Echocardiography – right ventricular ejection fraction (follow-up: 12 weeks)        |                   |             |                      |             |                           |      |    |    |   |                                                           |          |           |
| 1 <sup>206</sup>                                                                    | randomized trials | not serious | not serious          | not serious | very serious <sup>c</sup> | none | 22 | 22 | – | MD <b>54 mL/s higher</b> [37.53 higher to 70.47 higher]   | ⊕⊕⊕⊕ LOW | IMPORTANT |
| Echocardiography – cardiac output (follow-up: 12 weeks)                             |                   |             |                      |             |                           |      |    |    |   |                                                           |          |           |
| 2 <sup>205,206</sup>                                                                | randomized trials | not serious | serious              | not serious | very serious <sup>a</sup> | none | 48 | 48 | – | SMD <b>0.07 SD higher</b> [0.33 lower to 0.47 higher]     | ⊕⊕⊕⊕ LOW | IMPORTANT |
| Pulmonary vascular resistance (follow-up: 12 weeks)                                 |                   |             |                      |             |                           |      |    |    |   |                                                           |          |           |
| 2 <sup>205,206</sup>                                                                | randomized trials | not serious | serious              | not serious | serious <sup>c</sup>      | none | 48 | 48 | – | SMD <b>0.95 SD lower</b> [1.43 lower to 0.48 lower]       | ⊕⊕⊕⊕ LOW | IMPORTANT |
| Biomarkers (N-terminal pro-brain natriuretic peptide) (follow-up: 12 weeks)         |                   |             |                      |             |                           |      |    |    |   |                                                           |          |           |
| 1 <sup>205</sup>                                                                    | randomized trials | not serious | serious              | not serious | very serious <sup>a</sup> | none | 26 | 26 | – | MD <b>327 ng/L higher</b> [195.73 lower to 849.73 higher] | ⊕⊕⊕⊕ LOW | IMPORTANT |

© ESC/ERS 2022

CI, confidence interval; RR, risk ratio; MD, mean difference; SMD, standardized mean difference.

**Explanations**

<sup>a</sup>Small sample included and few events did not meet the optimal information size and suggested fragility of the estimate. The 95% CI included the potential for both meaningful benefit and meaningful harm.

<sup>b</sup>Zero events reported in the comparison arm. Manually calculated ARR.

<sup>c</sup>Small sample included and few events did not meet the optimal information size and suggested fragility of the estimate.

<sup>d</sup>Heterogeneity strongly suspected,  $I^2 = 99\%$ .

<sup>e</sup>Heterogeneity strongly suspected,  $I^2 = 96\%$ .

<sup>f</sup>Heterogeneity strongly suspected,  $I^2 = 97\%$ .

### 15.3. Guideline development tool evidence profile for PICO III

**Question:** Should phosphodiesterase type 5 inhibitors be used in patients with severe pulmonary hypertension associated with idiopathic interstitial lung diseases?

| No. of studies                                                                                                                                     | Certainty assessment |                          |               |                      |                             |                      |                                     | No. of patients                        |                                | Effect                                                               |                  | Certainty | Importance |
|----------------------------------------------------------------------------------------------------------------------------------------------------|----------------------|--------------------------|---------------|----------------------|-----------------------------|----------------------|-------------------------------------|----------------------------------------|--------------------------------|----------------------------------------------------------------------|------------------|-----------|------------|
|                                                                                                                                                    | Study design         | Risk of bias             | Inconsistency | Indirectness         | Imprecision                 | Other considerations | Phosphodiesterase type 5 inhibitors | No phosphodiesterase type 5 inhibitors | Relative [95% CI]              | Absolute [95% CI]                                                    |                  |           |            |
| <b>Mortality - right ventricular hypertrophy (follow-up: 12 weeks)</b>                                                                             |                      |                          |               |                      |                             |                      |                                     |                                        |                                |                                                                      |                  |           |            |
| 1 <sup>207</sup>                                                                                                                                   | randomized trials    | serious <sup>a</sup>     | not serious   | serious <sup>b</sup> | very serious <sup>c,d</sup> | none                 | 0/9 (0.0%)                          | 1/6 (16.7%)                            | <b>RR 0.23</b><br>[0.01–4.93]  | <b>128 fewer per 1000</b><br>[from 165 fewer to 655 more]            | ⊕○○○<br>VERY LOW | CRITICAL  |            |
| <b>Mortality - right ventricular systolic dysfunction (follow-up: 12 weeks)</b>                                                                    |                      |                          |               |                      |                             |                      |                                     |                                        |                                |                                                                      |                  |           |            |
| 1 <sup>207</sup>                                                                                                                                   | randomized trials    | serious <sup>a</sup>     | not serious   | serious <sup>b</sup> | very serious <sup>c,d</sup> | none                 | 0/11 (0.0%)                         | 1/11 (9.1%)                            | <b>RR 0.33</b><br>[0.02–7.39]  | <b>61 fewer per 1000</b><br>[from 89 fewer to 581 more]              | ⊕○○○<br>VERY LOW | CRITICAL  |            |
| <b>Mortality - no right ventricular hypertrophy (follow-up: 12 weeks)</b>                                                                          |                      |                          |               |                      |                             |                      |                                     |                                        |                                |                                                                      |                  |           |            |
| 1 <sup>207</sup>                                                                                                                                   | randomized trials    | serious <sup>a</sup>     | not serious   | serious <sup>b</sup> | very serious <sup>c,d</sup> | none                 | 2/46 (4.3%)                         | 2/56 (3.6%)                            | <b>RR 1.22</b><br>[0.18–8.31]  | <b>8 more per 1000</b><br>[from 29 fewer to 261 more]                | ⊕○○○<br>VERY LOW | CRITICAL  |            |
| <b>Mortality - no right ventricular systolic dysfunction (follow-up: 12 weeks)</b>                                                                 |                      |                          |               |                      |                             |                      |                                     |                                        |                                |                                                                      |                  |           |            |
| 1 <sup>207</sup>                                                                                                                                   | randomized trials    | serious <sup>a</sup>     | not serious   | serious <sup>b</sup> | very serious <sup>c,d</sup> | none                 | 2/45 (4.4%)                         | 2/51 (3.9%)                            | <b>RR 1.13</b><br>[0.17–7.72]  | <b>5 more per 1000</b><br>[from 33 fewer to 264 more]                | ⊕○○○<br>VERY LOW | CRITICAL  |            |
| <b>Safety (follow-up: 1 day)</b>                                                                                                                   |                      |                          |               |                      |                             |                      |                                     |                                        |                                |                                                                      |                  |           |            |
| 1 <sup>208</sup>                                                                                                                                   | randomized trials    | serious <sup>e</sup>     | not serious   | serious <sup>b</sup> | very serious <sup>f</sup>   | none                 | 0/8 (0.0%)                          | 0/8 (0.0%)                             | <b>RR 1.00</b><br>[0.02–45.13] | <b>0 fewer per 1000</b><br>[from 0 fewer to 0 fewer]                 | ⊕○○○<br>VERY LOW | CRITICAL  |            |
| <b>Partial pressure of arterial oxygen (PaO<sub>2</sub>) (follow-up: 1 day; assessed with fiberoptic thermodilution pulmonary artery catheter)</b> |                      |                          |               |                      |                             |                      |                                     |                                        |                                |                                                                      |                  |           |            |
| 1 <sup>208</sup>                                                                                                                                   | randomized trials    | not serious <sup>g</sup> | not serious   | serious <sup>b</sup> | very serious <sup>d,h</sup> | none                 | 8                                   | 8                                      | –                              | median difference<br><b>12 mmHg higher</b><br>[2 lower to 30 higher] | ⊕○○○<br>VERY LOW | CRITICAL  |            |

Continued

|                                                                                                                                         |                   |                          |             |                      |                             |      |    |    |                                                                 |               |           |
|-----------------------------------------------------------------------------------------------------------------------------------------|-------------------|--------------------------|-------------|----------------------|-----------------------------|------|----|----|-----------------------------------------------------------------|---------------|-----------|
| <b>Exercise capacity - right ventricular hypertrophy (follow-up: 12 weeks; assessed with 6-minute walking distance)</b>                 |                   |                          |             |                      |                             |      |    |    |                                                                 |               |           |
| 1 <sup>207</sup>                                                                                                                        | randomized trials | serious <sup>a</sup>     | not serious | serious <sup>b</sup> | very serious <sup>d,h</sup> | none | 56 | 63 | MD <b>78.5 m higher</b> [24.1 lower to 181 higher]              | ⊕○○○ VERY LOW | CRITICAL  |
| <b>Exercise capacity - right ventricular systolic dysfunction (follow-up: 12 weeks; assessed with 6-minute walking distance)</b>        |                   |                          |             |                      |                             |      |    |    |                                                                 |               |           |
| 1 <sup>207</sup>                                                                                                                        | randomized trials | serious <sup>a</sup>     | not serious | serious <sup>b</sup> | serious <sup>h</sup>        | none | 56 | 63 | MD <b>99.3 m higher</b> [22.3 higher to 176.2 higher]           | ⊕○○○ VERY LOW | CRITICAL  |
| <b>Exercise capacity - no right ventricular hypertrophy (follow-up: 12 weeks; assessed with 6-minute walking distance)</b>              |                   |                          |             |                      |                             |      |    |    |                                                                 |               |           |
| 1 <sup>207</sup>                                                                                                                        | randomized trials | serious <sup>a</sup>     | not serious | serious <sup>b</sup> | very serious <sup>d,h</sup> | none | 56 | 63 | MD <b>19.1 m higher</b> [18.1 lower to 56.4 higher]             | ⊕○○○ VERY LOW | CRITICAL  |
| <b>Exercise capacity - no right ventricular systolic dysfunction (follow-up: 12 weeks; assessed with 6-minute walking distance)</b>     |                   |                          |             |                      |                             |      |    |    |                                                                 |               |           |
| 1 <sup>207</sup>                                                                                                                        | randomized trials | serious <sup>a</sup>     | not serious | serious <sup>b</sup> | very serious <sup>d,h</sup> | none | 56 | 63 | MD <b>10 m higher</b> [27.9 lower to 47.8 higher]               | ⊕○○○ VERY LOW | CRITICAL  |
| <b>Pulmonary vascular resistance index (PVRI) (follow-up: 1 day; assessed with fiberoptic thermodilution pulmonary artery catheter)</b> |                   |                          |             |                      |                             |      |    |    |                                                                 |               |           |
| 1 <sup>208</sup>                                                                                                                        | randomized trials | not serious <sup>g</sup> | not serious | serious <sup>b</sup> | very serious <sup>h</sup>   | none | 8  | 8  | median difference <b>32.5% lower</b> [54.1 lower to 10.2 lower] | ⊕○○○ VERY LOW | IMPORTANT |
| <b>Mean pulmonary artery pressure (mPAP) (follow-up: 1 day; assessed with fiberoptic thermodilution pulmonary artery catheter)</b>      |                   |                          |             |                      |                             |      |    |    |                                                                 |               |           |
| 1 <sup>208</sup>                                                                                                                        | randomized trials | not serious <sup>g</sup> | not serious | serious <sup>b</sup> | very serious <sup>h</sup>   | none | 8  | 8  | median difference <b>26% lower</b> [15 lower to 40 lower]       | ⊕○○○ VERY LOW | IMPORTANT |
| <b>Quality of life - right ventricular hypertrophy (follow-up: 12 weeks; assessed with St George's Respiratory Questionnaire)</b>       |                   |                          |             |                      |                             |      |    |    |                                                                 |               |           |
| 1 <sup>207</sup>                                                                                                                        | randomized trials | serious <sup>a</sup>     | not serious | serious <sup>b</sup> | serious <sup>h</sup>        | none | 56 | 63 | MD <b>14.8 points lower</b> [2.8 lower to 26.8 lower]           | ⊕○○○ VERY LOW | NA        |

Continued

| Quality of life - right ventricular systolic dysfunction (follow-up: 12 weeks; assessed with St George's Respiratory Questionnaire)    |                   |                      |             |                      |                             |      |    |    |   |                                                       |                  |    |
|----------------------------------------------------------------------------------------------------------------------------------------|-------------------|----------------------|-------------|----------------------|-----------------------------|------|----|----|---|-------------------------------------------------------|------------------|----|
| 1 <sup>207</sup>                                                                                                                       | randomized trials | serious <sup>a</sup> | not serious | serious <sup>b</sup> | serious <sup>h</sup>        | none | 56 | 63 | – | MD <b>13.4 points lower</b> [4.2 lower to 22.7 lower] | ⊕○○○<br>VERY LOW | NA |
| Quality of life - no right ventricular hypertrophy (follow-up: 12 weeks; assessed with St George's Respiratory Questionnaire)          |                   |                      |             |                      |                             |      |    |    |   |                                                       |                  |    |
| 1 <sup>207</sup>                                                                                                                       | randomized trials | serious <sup>a</sup> | not serious | serious <sup>b</sup> | very serious <sup>d,h</sup> | none | 56 | 63 | – | MD <b>3.4 points lower</b> [7.8 lower to 1 higher]    | ⊕○○○<br>VERY LOW | NA |
| Quality of life - no right ventricular systolic dysfunction (follow-up: 12 weeks; assessed with St George's Respiratory Questionnaire) |                   |                      |             |                      |                             |      |    |    |   |                                                       |                  |    |
| 1 <sup>207</sup>                                                                                                                       | randomized trials | serious <sup>a</sup> | not serious | serious <sup>b</sup> | very serious <sup>d,h</sup> | none | 56 | 63 | – | MD <b>3 points lower</b> [7.6 lower to 1.7 higher]    | ⊕○○○<br>VERY LOW | NA |

© ESC/ERS 2022

CI, confidence interval; RR, risk ratio; MD, mean difference.

#### Explanations

<sup>a</sup>The study reported a post hoc subgroup analysis, breaking the randomization from the original trial.

<sup>b</sup>Patients were not reported to have idiopathic interstitial pneumonia.

<sup>c</sup>Small sample with few events; did not meet the optimal information size and suggested fragility of the estimate.

<sup>d</sup>The 95% CI included the potential for both meaningful benefit and meaningful harm.

<sup>e</sup>Intervention not blinded to participants or investigators.

<sup>f</sup>No events reported; did not meet the optimal information size and suggested fragility of the estimate.

<sup>g</sup>Although the intervention was not blinded, the outcomes were physiological measurements and unlikely to be influenced by subjective perception.

<sup>h</sup>Small sample; did not meet the optimal information size and suggested fragility of the estimate.

### 15.4. Guideline development tool evidence profile for PICO IV

**Question:** Should patients with chronic thrombo-embolic pulmonary hypertension who are considered inoperable but candidates for balloon pulmonary angioplasty receive medical therapy before interventional therapy is initiated?

| No. of studies                                                                                                                                  | Certainty assessment |                           |               |              |                      |                      |               | No. of patients |                               | Effect                                                 |               | Certainty | Importance |
|-------------------------------------------------------------------------------------------------------------------------------------------------|----------------------|---------------------------|---------------|--------------|----------------------|----------------------|---------------|-----------------|-------------------------------|--------------------------------------------------------|---------------|-----------|------------|
|                                                                                                                                                 | Study design         | Risk of bias              | Inconsistency | Indirectness | Imprecision          | Other considerations | Riociguat+BPA | BPA             | Relative [95% CI]             | Absolute [95% CI]                                      |               |           |            |
| <b>Pulmonary vascular resistance, Wood units (follow-up: 52 weeks)</b>                                                                          |                      |                           |               |              |                      |                      |               |                 |                               |                                                        |               |           |            |
| 1                                                                                                                                               | randomized trial     | very serious <sup>a</sup> | not serious   | not serious  | serious <sup>b</sup> | none                 | 36            | 31              | -                             | MD <b>0.2 higher</b> [0.39 lower to 0.79 higher]       | ⊕○○○ Very low | IMPORTANT |            |
| <b>6-minute walking distance, metres (follow-up: 52 weeks)</b>                                                                                  |                      |                           |               |              |                      |                      |               |                 |                               |                                                        |               |           |            |
| 1                                                                                                                                               | randomized trial     | very serious <sup>a</sup> | not serious   | not serious  | serious <sup>b</sup> | none                 | 36            | 31              | -                             | MD <b>5 higher</b> [41.22 lower to 51.22 higher]       | ⊕○○○ Very low | CRITICAL  |            |
| <b>Patients with ≥ 1 adverse events related to balloon pulmonary angioplasty (follow-up: 26 weeks)<sup>c</sup></b>                              |                      |                           |               |              |                      |                      |               |                 |                               |                                                        |               |           |            |
| 1                                                                                                                                               | randomized trial     | very serious <sup>a</sup> | not serious   | not serious  | serious <sup>b</sup> | none                 | 10/36 (27.8%) | 19/52 (36.5%)   | <b>RR 0.76</b> [0.40 to 1.44] | <b>88 fewer per 1000</b> [from 219 fewer to 161 more]  | ⊕○○○ Very low | CRITICAL  |            |
| <b>Patients with ≥ 1 adverse events and/or severe adverse events related to balloon pulmonary angioplasty (follow-up: 26 weeks)<sup>c</sup></b> |                      |                           |               |              |                      |                      |               |                 |                               |                                                        |               |           |            |
| 1                                                                                                                                               | randomized trial     | very serious <sup>a</sup> | not serious   | not serious  | serious <sup>b</sup> | none                 | 12/36 (33.3%) | 32/52 (61.5%)   | <b>RR 0.54</b> [0.33 to 0.90] | <b>283 fewer per 1000</b> [from 412 fewer to 62 fewer] | ⊕○○○ Very low | CRITICAL  |            |
| <b>Patients with ≥ 1 severe adverse events related to balloon pulmonary angioplasty (follow-up: 26 weeks)<sup>c</sup></b>                       |                      |                           |               |              |                      |                      |               |                 |                               |                                                        |               |           |            |
| 1                                                                                                                                               | randomized trial     | very serious <sup>a</sup> | not serious   | not serious  | serious <sup>b</sup> | none                 | 5/36 (13.9%)  | 22/52 (42.3%)   | <b>RR 0.33</b> [0.14 to 0.79] | <b>283 fewer per 1000</b> [from 364 fewer to 89 fewer] | ⊕○○○ Very low | CRITICAL  |            |

Continued

| Patients with $\geq 1$ severe balloon pulmonary angioplasty procedure-related complications (follow-up: 26 weeks) <sup>c</sup> |                  |                           |             |             |                      |      |             |               |                        |                                                 |               |               |
|--------------------------------------------------------------------------------------------------------------------------------|------------------|---------------------------|-------------|-------------|----------------------|------|-------------|---------------|------------------------|-------------------------------------------------|---------------|---------------|
| 1                                                                                                                              | randomized trial | very serious <sup>a</sup> | not serious | not serious | serious <sup>b</sup> | none | 3/36 (8.3%) | 18/52 (34.6%) | RR 0.24 [0.08 to 0.76] | 263 fewer per 1000 [from 318 fewer to 83 fewer] | ⊕○○○ Very low | CRITICAL      |
| <b>Mean pulmonary arterial pressure, mmHg (follow-up: 52 weeks)</b>                                                            |                  |                           |             |             |                      |      |             |               |                        |                                                 |               |               |
| 1                                                                                                                              | randomized trial | very serious <sup>a</sup> | not serious | not serious | serious <sup>b</sup> | none | 36          | 31            | -                      | MD 5 higher [2.11 higher to 7.89 higher]        | ⊕○○○ Very low | NOT IMPORTANT |
| <b>Cardiac output, L/min (follow-up: 52 weeks)</b>                                                                             |                  |                           |             |             |                      |      |             |               |                        |                                                 |               |               |
| 1                                                                                                                              | randomized trial | very serious <sup>a</sup> | not serious | not serious | serious <sup>b</sup> | none | 36          | 31            | -                      | MD 0.6 higher [0.02 higher to 1.18 higher]      | ⊕○○○ Very low | NOT IMPORTANT |
| <b>Survival, hospitalization, clinical worsening, quality of life, and lung injury - not reported</b>                          |                  |                           |             |             |                      |      |             |               |                        |                                                 |               |               |
| -                                                                                                                              | -                | -                         | -           | -           | -                    | -    | -           | -             | -                      | -                                               | -             | -             |

BPA, balloon pulmonary angioplasty; CI, confidence interval; MD, mean difference; RR, risk ratio.

#### Explanations

<sup>a</sup>The RACE study was open-label and the allocation of intervention for the extended follow-up study was not randomized.

<sup>b</sup>A single study including 105 patients.

<sup>c</sup>Adverse events related to BPA, severe adverse events related to BPA, and severe BPA procedure-related complications were monitored from study week 1 to 26 in patients allocated to BPA first-line and from study weeks 27–52 in patients allocated to BPA second-line after riociguat (group riociguat+BPA).

The final results of the RACE trial<sup>209</sup> and the ancillary extended 6 month follow-up have not yet been published, but confidential trial results have kindly been shared with the Guideline Panel by the RACE study investigators.

## 16. Evidence to Decision (EtD) tables

### 16.1. Evidence to Decision for PICO I

**Table S9 Evidence to Decision for PICO I**

**QUESTION**

**Should initial oral double combination therapy (ERAs and PDE5is) vs. monotherapy (ERAs, PDE5is) be used for symptomatic patients with pulmonary arterial hypertension?**

|                              |                                                                                                                                                                                                                                                                                                                                         |
|------------------------------|-----------------------------------------------------------------------------------------------------------------------------------------------------------------------------------------------------------------------------------------------------------------------------------------------------------------------------------------|
| <b>Population</b>            | Symptomatic patients with pulmonary arterial hypertension (PAH)                                                                                                                                                                                                                                                                         |
| <b>Intervention</b>          | Initial oral double combination therapy (ERAs and PDE5is)                                                                                                                                                                                                                                                                               |
| <b>Comparison</b>            | Monotherapy (ERAs, PDE5is)                                                                                                                                                                                                                                                                                                              |
| <b>Main outcomes</b>         | Hospitalization; unsatisfactory long-term clinical response; disease progression; exercise capacity; haemodynamic variables; cardiac biomarkers; quality of life; serious adverse events (including pulmonary hypertension, pneumonia); adverse events leading to discontinuation (including dyspnoea, peripheral oedema); and survival |
| <b>Setting</b>               | A single, event-driven, multicentre, randomized, double-blind, phase 3–4 study with time to first event of clinical failure as primary end-point                                                                                                                                                                                        |
| <b>Perspective</b>           | NA                                                                                                                                                                                                                                                                                                                                      |
| <b>Background</b>            | The RCT and its long-term extension were retained for analysis                                                                                                                                                                                                                                                                          |
| <b>Conflict of interests</b> | See COI declaration of the whole Task Force                                                                                                                                                                                                                                                                                             |

© ESC/ERS 2022

**ASSESSMENT**

**Problem:** Is the problem a priority?

| Judgement                                                                                                                                                                                                                 | Research evidence                                                                                                                                                                                                                                                                                                                                                                                                                                                                                                                                                                                                                                                                                                                                                                                                                                                                                                                                                                                       | Additional considerations |
|---------------------------------------------------------------------------------------------------------------------------------------------------------------------------------------------------------------------------|---------------------------------------------------------------------------------------------------------------------------------------------------------------------------------------------------------------------------------------------------------------------------------------------------------------------------------------------------------------------------------------------------------------------------------------------------------------------------------------------------------------------------------------------------------------------------------------------------------------------------------------------------------------------------------------------------------------------------------------------------------------------------------------------------------------------------------------------------------------------------------------------------------------------------------------------------------------------------------------------------------|---------------------------|
| <input type="radio"/> No<br><input type="radio"/> Probably no<br><input type="radio"/> Probably yes<br><input checked="" type="checkbox"/> <b>Yes</b><br><input type="radio"/> Varies<br><input type="radio"/> Don't know | Early intervention is of major importance in PAH, with late intervention being associated with irreversible damage in the pulmonary circulation. The results of main RCTs with monotherapies showed modest improvements in exercise capacity and haemodynamics, and their effect on long-term outcomes was less well established.<br>Combination therapy with drugs targeting different dysfunctional pathways is an appealing treatment strategy for patients with PAH. It may potentially increase the therapeutic effect of the agents on the mechanisms of the disease and provide additional clinical benefits. Previous clinical studies only investigated sequential add-on combination therapies leading to heterogeneous results in terms of clinical benefit.<br>There is a single treatment strategy trial (AMBITION) comparing dual oral combination therapy (with an endothelin-receptor antagonist, ambrisentan, and a PDE5i, tadalafil) and monotherapy (with ambrisentan or tadalafil). | NA                        |

**Desirable effects**

How substantial are the desirable anticipated effects?

| Judgement                                                                                                                                                                                                              | Research evidence                                                                                                                                                                                                                                                                                                                                                                                                                                                                                                                                                                                                                                                                                                                                                                                                                                                                      | Additional considerations                                                                                                                                                                                                                                                                                                                                                                                                                                                                                                                                                                                                                                                                                                                                                                                                                                                                                                                                                                   |
|------------------------------------------------------------------------------------------------------------------------------------------------------------------------------------------------------------------------|----------------------------------------------------------------------------------------------------------------------------------------------------------------------------------------------------------------------------------------------------------------------------------------------------------------------------------------------------------------------------------------------------------------------------------------------------------------------------------------------------------------------------------------------------------------------------------------------------------------------------------------------------------------------------------------------------------------------------------------------------------------------------------------------------------------------------------------------------------------------------------------|---------------------------------------------------------------------------------------------------------------------------------------------------------------------------------------------------------------------------------------------------------------------------------------------------------------------------------------------------------------------------------------------------------------------------------------------------------------------------------------------------------------------------------------------------------------------------------------------------------------------------------------------------------------------------------------------------------------------------------------------------------------------------------------------------------------------------------------------------------------------------------------------------------------------------------------------------------------------------------------------|
| <input type="radio"/> Trivial<br><input type="radio"/> Small<br><input type="radio"/> Moderate<br><input checked="" type="checkbox"/> <b>Large</b><br><input type="radio"/> Varies<br><input type="radio"/> Don't know | The single RCT (AMBITION) showed a desirable effect with dual oral combination therapy vs. oral monotherapy on the reduction in PAH-related hospitalization and improvement in exercise capacity assessed after 6 months (importance: critical; certainty: moderate). However, the risk of imprecision is serious due to the small number of events, which did not meet optimal information size and suggested fragility of the estimate.<br>Other desirable effects—including reduction in unsatisfactory clinical response and disease progression, reduction in the level of cardiac biomarkers, and improvement in functional class, both assessed after 6 months—had lower certainty.<br>In addition, the effect of initial dual oral combination therapy over monotherapy on survival was uncertain.<br>Finally, the effect of the two strategies (initial dual oral combination | Additional registry data do not support a favourable effect of initial dual combination over monotherapy on survival. Analysis of the association between initial treatment strategy and survival in a large cohort of idiopathic, heritable, and anorexigen-associated PAH, diagnosed between 2006–2018 and enrolled in the French PH Registry ( $n = 1611$ ), did not show any difference in long-term survival between patients initiated with dual combination therapy or monotherapy. A mild improvement in survival was observed with initial combination therapy in the subset of patients at intermediate risk. <sup>210</sup> In addition, despite the increasing use of initial combination therapy from 2010–2019 in patients enrolled in COMPERA ( $n = 2531$ ), 1 and 3 year survival rates did not change over time. <sup>211</sup> Similar results have been observed in a large cohort of patients ( $n = 435$ ) diagnosed at three major centres in Canada. <sup>212</sup> |

Continued

|  |                                                                                             |                                                                                                                                                                                                                                                                                                                                                                                                                          |
|--|---------------------------------------------------------------------------------------------|--------------------------------------------------------------------------------------------------------------------------------------------------------------------------------------------------------------------------------------------------------------------------------------------------------------------------------------------------------------------------------------------------------------------------|
|  | therapy or oral monotherapy) on cardiopulmonary haemodynamics was not assessed in AMBITION. | There is no haemodynamic evaluation from the AMBITION study. However, a favourable effect on cardiopulmonary haemodynamics has been shown with other combinations of an ERA and a PDE5i: French Registry, <sup>213</sup> OPTIMA study, <sup>214</sup> TRITON study. <sup>215</sup> There were no comparisons with monotherapy in those studies. Only historical haemodynamic data are available with oral monotherapies. |
|--|---------------------------------------------------------------------------------------------|--------------------------------------------------------------------------------------------------------------------------------------------------------------------------------------------------------------------------------------------------------------------------------------------------------------------------------------------------------------------------------------------------------------------------|

**Undesirable effects**  
How substantial are the undesirable anticipated effects?

| Judgement                                                                                                                                                                                                           | Research evidence                                                                                                                                                                                                                                                                                                                   | Additional considerations                                                   |
|---------------------------------------------------------------------------------------------------------------------------------------------------------------------------------------------------------------------|-------------------------------------------------------------------------------------------------------------------------------------------------------------------------------------------------------------------------------------------------------------------------------------------------------------------------------------|-----------------------------------------------------------------------------|
| <input type="radio"/> Large<br><input type="radio"/> Moderate<br><input checked="" type="radio"/> <b>Small</b><br><input type="radio"/> Trivial<br><input type="radio"/> Varies<br><input type="radio"/> Don't know | Peripheral oedema, headache, and nasal congestion are more common with combination therapy than with monotherapy. However, these undesirable effects are usually easily manageable. The incidence of hypotension, rates of discontinuation, and serious adverse events were similar with either combination therapy or monotherapy. | Initial dual oral combination therapy is considered as safe as monotherapy. |

**Certainty of evidence**  
What is the overall certainty of the evidence of effects?

| Judgement                                                                                                                                                                                  | Research evidence                                                                                                                                                                                                                                                                                                                                                                                                                                                                                                                                                                     | Additional considerations                                                                                                                                                                                                                                                                                                                                                                                                                                                                                                                                                                                                                                                                                                                                                                                                                                                                                                                                                                   |
|--------------------------------------------------------------------------------------------------------------------------------------------------------------------------------------------|---------------------------------------------------------------------------------------------------------------------------------------------------------------------------------------------------------------------------------------------------------------------------------------------------------------------------------------------------------------------------------------------------------------------------------------------------------------------------------------------------------------------------------------------------------------------------------------|---------------------------------------------------------------------------------------------------------------------------------------------------------------------------------------------------------------------------------------------------------------------------------------------------------------------------------------------------------------------------------------------------------------------------------------------------------------------------------------------------------------------------------------------------------------------------------------------------------------------------------------------------------------------------------------------------------------------------------------------------------------------------------------------------------------------------------------------------------------------------------------------------------------------------------------------------------------------------------------------|
| <input type="radio"/> Very low<br><input checked="" type="radio"/> <b>Low</b><br><input type="radio"/> Moderate<br><input type="radio"/> High<br><input type="radio"/> No included studies | Low, based on the lowest grading of the critical outcomes. Due to the presence of a single RCT and the small number of events, there was a serious imprecision in the results (did not meet optimal information size and suggested fragility of the estimate). The quality of evidence was low or moderate, depending on the outcome (due to the imprecision). Moderate certainty was observed for hospitalization and 6MWD, which are two major predictors of outcomes in PAH. There was a non-significant trend for improved survival with initial dual combination vs. monotherapy | Additional registry data do not support a favourable effect of initial dual combination over monotherapy on survival. Analysis of the association between initial treatment strategy and survival in a large cohort of idiopathic, heritable, and anorexigen-associated PAH, diagnosed between 2006–2018 and enrolled in the French PH Registry ( $n = 1611$ ), did not show any difference in long-term survival between patients initiated with dual combination therapy or monotherapy. A mild improvement in survival was observed with initial combination therapy in the subset of patients at intermediate risk. <sup>210</sup> In addition, despite the increasing use of initial combination therapy from 2010–2019 in patients enrolled in COMPERA ( $n = 2531$ ), 1 and 3 year survival rates did not change over time. <sup>211</sup> Similar results have been observed in a large cohort of patients ( $n = 435$ ) diagnosed at three major centres in Canada. <sup>212</sup> |

**Values**  
Is there important uncertainty about or variability in how much people value the main outcomes?

| Judgement                                                                                                                                                                                                                                                                                      | Research evidence              | Additional considerations                                                                                                                                                                                                                       |
|------------------------------------------------------------------------------------------------------------------------------------------------------------------------------------------------------------------------------------------------------------------------------------------------|--------------------------------|-------------------------------------------------------------------------------------------------------------------------------------------------------------------------------------------------------------------------------------------------|
| <input type="radio"/> Important uncertainty or variability<br><input type="radio"/> Possibly important uncertainty or variability<br><input checked="" type="radio"/> <b>Probably no important uncertainty or variability</b><br><input type="radio"/> No important uncertainty or variability | There are no included studies. | Patient preferences include usually fewer symptoms, better exercise capacity, better overall quality of life, using the most effective medicine rather than the most aggressive medicine. Haemodynamics seem to be less important for patients. |

Continued



| <b>Balance of effects</b>                                                                                                                                                                                                                                                                                                                                                                               |                                                                                                                                                                                                                                                                                                                                                                                                                                                                                                                                                                                                                                                                                                                                                                                                          |                                                                                                                                                                                                                                                                                                                                                                                                                                                                 |
|---------------------------------------------------------------------------------------------------------------------------------------------------------------------------------------------------------------------------------------------------------------------------------------------------------------------------------------------------------------------------------------------------------|----------------------------------------------------------------------------------------------------------------------------------------------------------------------------------------------------------------------------------------------------------------------------------------------------------------------------------------------------------------------------------------------------------------------------------------------------------------------------------------------------------------------------------------------------------------------------------------------------------------------------------------------------------------------------------------------------------------------------------------------------------------------------------------------------------|-----------------------------------------------------------------------------------------------------------------------------------------------------------------------------------------------------------------------------------------------------------------------------------------------------------------------------------------------------------------------------------------------------------------------------------------------------------------|
| Does the balance between desirable and undesirable effects favour the intervention or the comparison?                                                                                                                                                                                                                                                                                                   |                                                                                                                                                                                                                                                                                                                                                                                                                                                                                                                                                                                                                                                                                                                                                                                                          |                                                                                                                                                                                                                                                                                                                                                                                                                                                                 |
| <b>Judgement</b>                                                                                                                                                                                                                                                                                                                                                                                        | <b>Research evidence</b>                                                                                                                                                                                                                                                                                                                                                                                                                                                                                                                                                                                                                                                                                                                                                                                 | <b>Additional considerations</b>                                                                                                                                                                                                                                                                                                                                                                                                                                |
| <input type="radio"/> Favours the comparison<br><input type="radio"/> Probably favours the comparison<br><input type="radio"/> Does not favour either the intervention or the comparison<br><input checked="" type="checkbox"/> <b>Probably favours the intervention</b><br><input type="radio"/> Favours the intervention<br><input type="radio"/> Varies<br><input type="radio"/> Don't know          | The single RCT (AMBITION) showed a desirable effect with dual oral combination therapy vs. monotherapy on the reduction in PAH-related hospitalization and improvement in exercise capacity assessed after 6 months (importance: critical; certainty: moderate). However, the risk of imprecision was serious due to the small number of events, which did not meet optimal information size and suggested fragility of the estimate.<br>Other desirable effects—including reduction in unsatisfactory clinical response and disease progression, as well as reduction in the level of cardiac biomarkers and improvement in functional class, both assessed after 6 months—had lower certainty. The effect on survival was also uncertain.<br>Effect on cardiopulmonary haemodynamics was not assessed. | NA                                                                                                                                                                                                                                                                                                                                                                                                                                                              |
| <b>Resources required</b>                                                                                                                                                                                                                                                                                                                                                                               |                                                                                                                                                                                                                                                                                                                                                                                                                                                                                                                                                                                                                                                                                                                                                                                                          |                                                                                                                                                                                                                                                                                                                                                                                                                                                                 |
| How large are the resource requirements (costs)?                                                                                                                                                                                                                                                                                                                                                        |                                                                                                                                                                                                                                                                                                                                                                                                                                                                                                                                                                                                                                                                                                                                                                                                          |                                                                                                                                                                                                                                                                                                                                                                                                                                                                 |
| <b>Judgement</b>                                                                                                                                                                                                                                                                                                                                                                                        | <b>Research evidence</b>                                                                                                                                                                                                                                                                                                                                                                                                                                                                                                                                                                                                                                                                                                                                                                                 | <b>Additional considerations</b>                                                                                                                                                                                                                                                                                                                                                                                                                                |
| <input type="radio"/> Large costs<br><input checked="" type="checkbox"/> <b>Moderate costs</b><br><input type="radio"/> Negligible costs and savings<br><input type="radio"/> Moderate savings<br><input type="radio"/> Large savings<br><input type="radio"/> Varies<br><input type="radio"/> Don't know                                                                                               | This was not formally assessed in the single trial.                                                                                                                                                                                                                                                                                                                                                                                                                                                                                                                                                                                                                                                                                                                                                      | Initial combination therapy is obviously more costly than monotherapy. The cost of intervention is variable across countries. However, ambrisentan and tadalafil are today generic worldwide and costs of medication are much lower than they were in the past. Reductions in hospitalizations may be associated with savings. The balance between the cost of the drugs and savings in hospitalization costs may differ between health care systems.           |
| <b>Certainty of evidence of required resources</b>                                                                                                                                                                                                                                                                                                                                                      |                                                                                                                                                                                                                                                                                                                                                                                                                                                                                                                                                                                                                                                                                                                                                                                                          |                                                                                                                                                                                                                                                                                                                                                                                                                                                                 |
| What is the certainty of the evidence of resource requirements (costs)?                                                                                                                                                                                                                                                                                                                                 |                                                                                                                                                                                                                                                                                                                                                                                                                                                                                                                                                                                                                                                                                                                                                                                                          |                                                                                                                                                                                                                                                                                                                                                                                                                                                                 |
| <b>Judgement</b>                                                                                                                                                                                                                                                                                                                                                                                        | <b>Research evidence</b>                                                                                                                                                                                                                                                                                                                                                                                                                                                                                                                                                                                                                                                                                                                                                                                 | <b>Additional considerations</b>                                                                                                                                                                                                                                                                                                                                                                                                                                |
| <input type="radio"/> Very low<br><input checked="" type="checkbox"/> <b>Low</b><br><input type="radio"/> Moderate<br><input type="radio"/> High<br><input type="radio"/> No included studies                                                                                                                                                                                                           | There is no pharmaco-economic analysis.                                                                                                                                                                                                                                                                                                                                                                                                                                                                                                                                                                                                                                                                                                                                                                  | NA                                                                                                                                                                                                                                                                                                                                                                                                                                                              |
| <b>Cost-effectiveness</b>                                                                                                                                                                                                                                                                                                                                                                               |                                                                                                                                                                                                                                                                                                                                                                                                                                                                                                                                                                                                                                                                                                                                                                                                          |                                                                                                                                                                                                                                                                                                                                                                                                                                                                 |
| Does the cost-effectiveness of the intervention favour the intervention or the comparison?                                                                                                                                                                                                                                                                                                              |                                                                                                                                                                                                                                                                                                                                                                                                                                                                                                                                                                                                                                                                                                                                                                                                          |                                                                                                                                                                                                                                                                                                                                                                                                                                                                 |
| <b>Judgement</b>                                                                                                                                                                                                                                                                                                                                                                                        | <b>Research evidence</b>                                                                                                                                                                                                                                                                                                                                                                                                                                                                                                                                                                                                                                                                                                                                                                                 | <b>Additional considerations</b>                                                                                                                                                                                                                                                                                                                                                                                                                                |
| <input type="radio"/> Favours the comparison<br><input type="radio"/> Probably favours the comparison<br><input type="radio"/> Does not favour either the intervention or the comparison<br><input checked="" type="checkbox"/> <b>Probably favours the intervention</b><br><input type="radio"/> Favours the intervention<br><input type="radio"/> Varies<br><input type="radio"/> No included studies | This was not formally assessed in the single trial.                                                                                                                                                                                                                                                                                                                                                                                                                                                                                                                                                                                                                                                                                                                                                      | The beneficial effect of initial dual oral combination therapy on the reduction in PAH-related hospitalizations (which represents the highest cost in the care of patients with PAH) may be associated with cost savings. The reduction in hospitalization combined with the reduction in medication costs could be cost-effective. However, the balance between the cost of drugs and savings in hospitalization costs may differ between health care systems. |

Continued

| Equity                                                                                                                                                                                                                                                                                   |                                                                                                                          |                           |
|------------------------------------------------------------------------------------------------------------------------------------------------------------------------------------------------------------------------------------------------------------------------------------------|--------------------------------------------------------------------------------------------------------------------------|---------------------------|
| What would be the impact on health equity?                                                                                                                                                                                                                                               |                                                                                                                          |                           |
| Judgement                                                                                                                                                                                                                                                                                | Research evidence                                                                                                        | Additional considerations |
| <input type="radio"/> Reduced<br><input type="radio"/> Probably reduced<br><input checked="" type="radio"/> <b>Probably no impact</b><br><input type="radio"/> Probably increased<br><input type="radio"/> Increased<br><input type="radio"/> Varies<br><input type="radio"/> Don't know | There are no included studies. However, it is not believed that this intervention would have an impact on health equity. | NA                        |

  

| Acceptability                                                                                                                                                                                                          |                                |                                                                                                                                    |
|------------------------------------------------------------------------------------------------------------------------------------------------------------------------------------------------------------------------|--------------------------------|------------------------------------------------------------------------------------------------------------------------------------|
| Is the intervention acceptable to key stakeholders?                                                                                                                                                                    |                                |                                                                                                                                    |
| Judgement                                                                                                                                                                                                              | Research evidence              | Additional considerations                                                                                                          |
| <input type="radio"/> No<br><input type="radio"/> Probably no<br><input type="radio"/> Probably yes<br><input checked="" type="radio"/> <b>Yes</b><br><input type="radio"/> Varies<br><input type="radio"/> Don't know | There are no included studies. | Stakeholders would likely consider the intervention acceptable due to the large utilization of this approach in clinical practice. |

  

| Feasibility                                                                                                                                                                                                            |                                |                                                                                        |
|------------------------------------------------------------------------------------------------------------------------------------------------------------------------------------------------------------------------|--------------------------------|----------------------------------------------------------------------------------------|
| Is the intervention feasible to implement?                                                                                                                                                                             |                                |                                                                                        |
| Judgement                                                                                                                                                                                                              | Research evidence              | Additional considerations                                                              |
| <input type="radio"/> No<br><input type="radio"/> Probably no<br><input type="radio"/> Probably yes<br><input checked="" type="radio"/> <b>Yes</b><br><input type="radio"/> Varies<br><input type="radio"/> Don't know | There are no included studies. | There is no real barrier to feasibility in the general management of PAH (oral drugs). |

© ESC/ERS 2022

**SUMMARY OF JUDGEMENTS**

|                                                    | Judgement                            |                                               |                                                           |                                         |                          |        |                     |
|----------------------------------------------------|--------------------------------------|-----------------------------------------------|-----------------------------------------------------------|-----------------------------------------|--------------------------|--------|---------------------|
|                                                    | No                                   | Probably no                                   | Probably yes                                              | Yes                                     | NA                       | Varies | Don't know          |
| <b>Problem</b>                                     | No                                   | Probably no                                   | Probably yes                                              | Yes                                     | NA                       | Varies | Don't know          |
| <b>Desirable effects</b>                           | Trivial                              | Small                                         | Moderate                                                  | Large                                   | NA                       | Varies | Don't know          |
| <b>Undesirable effects</b>                         | Large                                | Moderate                                      | Small                                                     | Trivial                                 | NA                       | Varies | Don't know          |
| <b>Certainty of evidence</b>                       | Very low                             | Low                                           | Moderate                                                  | High                                    | NA                       | NA     | No included studies |
| <b>Values</b>                                      | Important uncertainty or variability | Possibly important uncertainty or variability | Probably no important uncertainty or variability          | No important uncertainty or variability | NA                       | NA     | NA                  |
| <b>Balance of effects</b>                          | Favours the comparison               | Probably favours the comparison               | Does not favour either the intervention or the comparison | Probably favours the intervention       | Favours the intervention | Varies | Don't know          |
| <b>Resources required</b>                          | Large costs                          | Moderate costs                                | Negligible costs and savings                              | Moderate savings                        | Large savings            | Varies | Don't know          |
| <b>Certainty of evidence of required resources</b> | Very low                             | Low                                           | Moderate                                                  | High                                    | NA                       | NA     | No included studies |

Continued

|                           |                        |                                 |                                                           |                                          |                          |        |                     |
|---------------------------|------------------------|---------------------------------|-----------------------------------------------------------|------------------------------------------|--------------------------|--------|---------------------|
| <b>Cost-effectiveness</b> | Favours the comparison | Probably favours the comparison | Does not favour either the intervention or the comparison | <b>Probably favours the intervention</b> | Favours the intervention | Varies | No included studies |
| <b>Equity</b>             | Reduced                | Probably reduced                | <b>Probably no impact</b>                                 | Probably increased                       | Increased                | Varies | Don't know          |
| <b>Acceptability</b>      | No                     | Probably no                     | Probably yes                                              | <b>Yes</b>                               | NA                       | Varies | Don't know          |
| <b>Feasibility</b>        | No                     | Probably no                     | Probably yes                                              | <b>Yes</b>                               | NA                       | Varies | Don't know          |

© ESC/ERS 2022

### TYPE OF RECOMMENDATION

|                                                |                                                     |                                                                          |                                                 |                                            |
|------------------------------------------------|-----------------------------------------------------|--------------------------------------------------------------------------|-------------------------------------------------|--------------------------------------------|
| Strong recommendation against the intervention | Conditional recommendation against the intervention | Conditional recommendation for either the intervention or the comparison | Conditional recommendation for the intervention | Strong recommendation for the intervention |
| ○                                              | ○                                                   | ○                                                                        | ☑                                               | ○                                          |

© ESC/ERS 2022

### CONCLUSIONS

|                                                                                                                                                                                                                                                                                                                                                                                                                                                                                                                                                                                                                                                                                                                                                                                                                                                             |
|-------------------------------------------------------------------------------------------------------------------------------------------------------------------------------------------------------------------------------------------------------------------------------------------------------------------------------------------------------------------------------------------------------------------------------------------------------------------------------------------------------------------------------------------------------------------------------------------------------------------------------------------------------------------------------------------------------------------------------------------------------------------------------------------------------------------------------------------------------------|
| <b>Recommendations</b>                                                                                                                                                                                                                                                                                                                                                                                                                                                                                                                                                                                                                                                                                                                                                                                                                                      |
| The available data support a positive recommendation, despite the low certainty of evidence (a single RCT; small number of events). The primary end-point of time to death or morbidity event was met (driven by the reduction in hospitalizations). Secondary efficacy end-points such as change in exercise capacity (6MWD) and cardiac biomarkers (NT-proBNP) are also in favour of initial combination therapy. The lack of haemodynamic evaluation is a weakness. There is no safety concern. Finally, the long-term effect on survival is uncertain.<br>Recommendation: For symptomatic patients with pulmonary arterial hypertension, it is suggested to initiate oral double combination therapy (endothelin receptor antagonists and phosphodiesterase type 5 inhibitors) (conditional recommendation for the intervention, low-quality evidence). |
| <b>Justification</b>                                                                                                                                                                                                                                                                                                                                                                                                                                                                                                                                                                                                                                                                                                                                                                                                                                        |
| Although the quality of evidence is low, initial oral combination therapy with an ERA and PDE5i achieves important targets such as improvement in symptoms (functional class), exercise capacity, and cardiac biomarkers. The reduction in hospitalizations is an important effect, as it is usually associated with improved survival (not demonstrated in the single RCT).                                                                                                                                                                                                                                                                                                                                                                                                                                                                                |
| <b>Subgroup considerations</b>                                                                                                                                                                                                                                                                                                                                                                                                                                                                                                                                                                                                                                                                                                                                                                                                                              |
| NA                                                                                                                                                                                                                                                                                                                                                                                                                                                                                                                                                                                                                                                                                                                                                                                                                                                          |
| <b>Implementation considerations</b>                                                                                                                                                                                                                                                                                                                                                                                                                                                                                                                                                                                                                                                                                                                                                                                                                        |
| NA                                                                                                                                                                                                                                                                                                                                                                                                                                                                                                                                                                                                                                                                                                                                                                                                                                                          |
| <b>Monitoring and evaluation</b>                                                                                                                                                                                                                                                                                                                                                                                                                                                                                                                                                                                                                                                                                                                                                                                                                            |
| NA                                                                                                                                                                                                                                                                                                                                                                                                                                                                                                                                                                                                                                                                                                                                                                                                                                                          |
| <b>Research priorities</b>                                                                                                                                                                                                                                                                                                                                                                                                                                                                                                                                                                                                                                                                                                                                                                                                                                  |
| Further data on the comparison of initial combination therapy and monotherapy followed by sequential combination therapy if needed would be welcome. If an RCT is difficult to consider, a deep analysis into registries could address this question.                                                                                                                                                                                                                                                                                                                                                                                                                                                                                                                                                                                                       |

© ESC/ERS 2022

## 16.2. Evidence to Decision for PICO II

**Table S10 Evidence to Decision for PICO II**

### QUESTION

|                                                                                                                                                                                            |                                                                                                                                                                                                                                                                                                                                                                                                                                                                                                                                    |
|--------------------------------------------------------------------------------------------------------------------------------------------------------------------------------------------|------------------------------------------------------------------------------------------------------------------------------------------------------------------------------------------------------------------------------------------------------------------------------------------------------------------------------------------------------------------------------------------------------------------------------------------------------------------------------------------------------------------------------------|
| <b>Should phosphodiesterase type 5 inhibitors be used for patients with combined post- and pre-capillary pulmonary hypertension due to heart failure with preserved ejection fraction?</b> |                                                                                                                                                                                                                                                                                                                                                                                                                                                                                                                                    |
| <b>Population</b>                                                                                                                                                                          | Patients with combined post- and pre-capillary pulmonary hypertension due to HFpEF                                                                                                                                                                                                                                                                                                                                                                                                                                                 |
| <b>Intervention</b>                                                                                                                                                                        | Phosphodiesterase type 5 inhibitors                                                                                                                                                                                                                                                                                                                                                                                                                                                                                                |
| <b>Comparison</b>                                                                                                                                                                          | No phosphodiesterase type 5 inhibitors                                                                                                                                                                                                                                                                                                                                                                                                                                                                                             |
| <b>Main outcomes</b>                                                                                                                                                                       | Mortality; CV morbidity (cardiac failure); hospitalization/clinical worsening; quality of life; primary safety endpoint (composite: cardiac failure, intestinal infarction, death); non-study specific SAEs (pneumonia, vascular pseudoaneurysm, medical device complication, elective surgery, respiratory tract infection); exercise capacity; echocardiography - PAP; echocardiography - RVSP; echocardiography - TAPSE; echocardiography - RVEF; echocardiography - CO; pulmonary vascular resistance; biomarkers (NT-proBNP). |

Continued

|                              |                                                                                                                                                                                                                                                                                                                                                                                                           |
|------------------------------|-----------------------------------------------------------------------------------------------------------------------------------------------------------------------------------------------------------------------------------------------------------------------------------------------------------------------------------------------------------------------------------------------------------|
| <b>Setting</b>               | Only placebo-controlled clinical trials reporting invasive haemodynamics were considered for analysis.                                                                                                                                                                                                                                                                                                    |
| <b>Perspective</b>           | NA                                                                                                                                                                                                                                                                                                                                                                                                        |
| <b>Background</b>            | Data from registries showed that PDE5i are occasionally used to treat patients with HFpEF and PH, despite a class III recommendation in previous guidelines.<br>There are no RCTs on PDE5i that specifically enrolled patients with HFpEF and CpcPH.<br>As additional information, two RCTs in patients with HFpEF and PH were retained for analysis, both being conducted with sildenafil as study drug. |
| <b>Conflict of interests</b> | See the COI declaration of the whole Task Force.                                                                                                                                                                                                                                                                                                                                                          |

## ASSESSMENT

|                                                                                                                                                                                                                        |                                                                                                                                                                                                                                                                                                                                                                                                                                                                                                                                                                                                                                                     |                                                                                                                                                                                                                                                                                                                                                                                                                                                                                                                                                                                                                                                                                                 |
|------------------------------------------------------------------------------------------------------------------------------------------------------------------------------------------------------------------------|-----------------------------------------------------------------------------------------------------------------------------------------------------------------------------------------------------------------------------------------------------------------------------------------------------------------------------------------------------------------------------------------------------------------------------------------------------------------------------------------------------------------------------------------------------------------------------------------------------------------------------------------------------|-------------------------------------------------------------------------------------------------------------------------------------------------------------------------------------------------------------------------------------------------------------------------------------------------------------------------------------------------------------------------------------------------------------------------------------------------------------------------------------------------------------------------------------------------------------------------------------------------------------------------------------------------------------------------------------------------|
| <b>Problem</b><br>Is the problem a priority?                                                                                                                                                                           |                                                                                                                                                                                                                                                                                                                                                                                                                                                                                                                                                                                                                                                     |                                                                                                                                                                                                                                                                                                                                                                                                                                                                                                                                                                                                                                                                                                 |
| <b>Judgement</b>                                                                                                                                                                                                       | <b>Research evidence</b>                                                                                                                                                                                                                                                                                                                                                                                                                                                                                                                                                                                                                            | <b>Additional considerations</b>                                                                                                                                                                                                                                                                                                                                                                                                                                                                                                                                                                                                                                                                |
| <input type="radio"/> No<br><input type="radio"/> Probably no<br><input type="radio"/> Probably yes<br><input checked="" type="radio"/> <b>Yes</b><br><input type="radio"/> Varies<br><input type="radio"/> Don't know | There is clear evidence that HFpEF and PH due to HFpEF are areas of unmet medical need. When present, PH at rest was associated with a worse outcome (see references in the text). In addition, the presence of a pre-capillary component was a strong marker of outcome. Until now, there is no approved therapy for the underlying cause of PH. Although data from registries, case series, or retrospective analysis suggested a benefit from the intervention, there is a need to establish specific therapies through RCTs.                                                                                                                    | NA                                                                                                                                                                                                                                                                                                                                                                                                                                                                                                                                                                                                                                                                                              |
| <b>Desirable effects</b><br>How substantial are the desirable anticipated effects?                                                                                                                                     |                                                                                                                                                                                                                                                                                                                                                                                                                                                                                                                                                                                                                                                     |                                                                                                                                                                                                                                                                                                                                                                                                                                                                                                                                                                                                                                                                                                 |
| <b>Judgement</b>                                                                                                                                                                                                       | <b>Research evidence</b>                                                                                                                                                                                                                                                                                                                                                                                                                                                                                                                                                                                                                            | <b>Additional considerations</b>                                                                                                                                                                                                                                                                                                                                                                                                                                                                                                                                                                                                                                                                |
| <input type="radio"/> Trivial<br><input checked="" type="radio"/> <b>Small</b><br><input type="radio"/> Moderate<br><input type="radio"/> Large<br><input type="radio"/> Varies<br><input type="radio"/> Don't know    | There are no RCTs on PDE5i that specifically enrolled patients with HFpEF and CpcPH.<br>Two small RCTs were identified that were performed in patients with HFpEF and PH, with variable haemodynamic profiles: (1) In patients with predominantly an lpcPH profile, sildenafil vs. placebo had no effect on PAPm (primary endpoint), or other haemodynamic and clinical measures. (2) In patients with a predominantly CpcPH profile, sildenafil vs. placebo improved haemodynamics, RV function, and quality of life (QoL) at 6 and 12 months.<br>No data on cardiovascular events (mortality, hospitalizations) are available. <sup>205,206</sup> | In addition, retrospective data from single centre analyses suggest that PDE5i may improve haemodynamics, symptoms, and exercise capacity in selected patients with HFpEF and severe PH (i.e. a pre-capillary component characterized by an increase in PVR >5 WU. <sup>216</sup> In addition, analysis of the prospective registry COMPERA suggested improvements in exercise capacity with PDE5i therapy in patients with HFpEF-PH who also had an elevated PVR (7.0 ± 3.4 WU), albeit to a lesser extent than in patients with PAH. <sup>217</sup> Long-term data on the effects of PDE5i against a comparator on clinical worsening events and survival were not provided in these studies. |
| <b>Undesirable effects</b><br>How substantial are the undesirable anticipated effects?                                                                                                                                 |                                                                                                                                                                                                                                                                                                                                                                                                                                                                                                                                                                                                                                                     |                                                                                                                                                                                                                                                                                                                                                                                                                                                                                                                                                                                                                                                                                                 |
| <b>Judgement</b>                                                                                                                                                                                                       | <b>Research evidence</b>                                                                                                                                                                                                                                                                                                                                                                                                                                                                                                                                                                                                                            | <b>Additional considerations</b>                                                                                                                                                                                                                                                                                                                                                                                                                                                                                                                                                                                                                                                                |
| <input type="radio"/> Large<br><input type="radio"/> Moderate<br><input type="radio"/> Small<br><input checked="" type="radio"/> <b>Trivial</b><br><input type="radio"/> Varies<br><input type="radio"/> Don't know    | In line with the above desirable effects, there are also no RCTs on PDE5i that specifically enrolled patients with HFpEF and CpcPH with respect to undesirable effects.<br>There is no evidence on the safety, tolerability, and efficacy of PDE5i from RCTs specifically performed in patients with HFpEF-CpcPH.<br>The analysis from the available studies assessing the use of PDE5i in patients with HFpEF and PH did not suggest                                                                                                                                                                                                               | There was also no safety signal for PDE5i vs. placebo in an RCT in patients with HFpEF who were not selected for the presence of PH. <sup>218</sup> In a COMPERA analysis, <sup>217</sup> the overall rate of PDE5i withdrawal was higher in patients with PH associated with HFpEF than in patients with 'atypical' and 'typical' idiopathic pulmonary arterial hypertension (18.4%, 13.2%, and 8.8%, respectively), which was partly due to non-specified side effects (5.3%, 3.8%, and 2.6%, respectively).                                                                                                                                                                                  |

Continued

|  |                                                                                                                                                                                                                                                  |  |
|--|--------------------------------------------------------------------------------------------------------------------------------------------------------------------------------------------------------------------------------------------------|--|
|  | undesirable effects besides the known side effects of PDE5i therapy.<br>Although the certainty of evidence was low, there was no undesirable effect identified within the two RCTs in patients with HFpEF and PH. The intervention appears safe. |  |
|--|--------------------------------------------------------------------------------------------------------------------------------------------------------------------------------------------------------------------------------------------------|--|

**Certainty of evidence**

What is the overall certainty of the evidence of effects?

| Judgement                                                                                                                                                                                  | Research evidence                                      | Additional considerations                                                                                                                         |
|--------------------------------------------------------------------------------------------------------------------------------------------------------------------------------------------|--------------------------------------------------------|---------------------------------------------------------------------------------------------------------------------------------------------------|
| <input type="radio"/> Very low<br><input checked="" type="radio"/> <b>Low</b><br><input type="radio"/> Moderate<br><input type="radio"/> High<br><input type="radio"/> No included studies | Based on GRADE assessment, see GRADE evidence profile. | The presence of conflicting results obtained in heterogenous populations and the small sample sizes made the overall quality of the evidence low. |

**Values**

Is there important uncertainty about or variability in how much people value the main outcomes?

| Judgement                                                                                                                                                                                                                                                                                      | Research evidence       | Additional considerations                                                                                                                                                                                                                                                                                                                                                                         |
|------------------------------------------------------------------------------------------------------------------------------------------------------------------------------------------------------------------------------------------------------------------------------------------------|-------------------------|---------------------------------------------------------------------------------------------------------------------------------------------------------------------------------------------------------------------------------------------------------------------------------------------------------------------------------------------------------------------------------------------------|
| <input type="radio"/> Important uncertainty or variability<br><input type="radio"/> Possibly important uncertainty or variability<br><input checked="" type="radio"/> <b>Probably no important uncertainty or variability</b><br><input type="radio"/> No important uncertainty or variability | No evidence identified. | While there are no data on how patients with PH-HFpEF value major outcomes, there is evidence from HFpEF and other forms of PH that important patient-related outcomes include exercise capacity, breathlessness, QoL, and survival. There is no reason to assume that patients with PH-HFpEF have a different perspective on these outcomes than patients with HFpEF alone or other forms of PH. |

**Balance of effects**

Does the balance between desirable and undesirable effects favour the intervention or the comparison?

| Judgement                                                                                                                                                                                                                                                                                                                                                                                   | Research evidence                                                                                                                                                                       | Additional considerations |
|---------------------------------------------------------------------------------------------------------------------------------------------------------------------------------------------------------------------------------------------------------------------------------------------------------------------------------------------------------------------------------------------|-----------------------------------------------------------------------------------------------------------------------------------------------------------------------------------------|---------------------------|
| <input type="radio"/> Favours the comparison<br><input type="radio"/> Probably favours the comparison<br><input checked="" type="radio"/> <b>Does not favour either the intervention or the comparison</b><br><input type="radio"/> Probably favours the intervention<br><input type="radio"/> Favours the intervention<br><input type="radio"/> Varies<br><input type="radio"/> Don't know | Although there is no negative safety signal, the current evidence is insufficient to determine the balance of desirable and undesirable effects of PDE5i in patients with HFpEF and PH. | NA                        |

**Resources required**

How large are the resource requirements (costs)?

| Judgement                                                                                                                                                                                                                                                                                              | Research evidence                                                        | Additional considerations                                                                                                                                                                                      |
|--------------------------------------------------------------------------------------------------------------------------------------------------------------------------------------------------------------------------------------------------------------------------------------------------------|--------------------------------------------------------------------------|----------------------------------------------------------------------------------------------------------------------------------------------------------------------------------------------------------------|
| <input type="radio"/> Large costs<br><input type="radio"/> Moderate costs<br><input type="radio"/> Negligible costs and savings<br><input type="radio"/> Moderate savings<br><input type="radio"/> Large savings<br><input type="radio"/> Varies<br><input checked="" type="radio"/> <b>Don't know</b> | No evidence identified. There is no pharmacoeconomic analysis available. | The costs of the intervention vary between countries but are generally considered moderate. Potential savings through reduction in hospitalizations have not been assessed and therefore cannot be considered. |

*Continued*

**Certainty of evidence of required resources**

What is the certainty of the evidence of resource requirements (costs)?

| Judgement                                                                                                                                                                                     | Research evidence                                                        | Additional considerations                                           |
|-----------------------------------------------------------------------------------------------------------------------------------------------------------------------------------------------|--------------------------------------------------------------------------|---------------------------------------------------------------------|
| <input type="radio"/> Very low<br><input type="radio"/> Low<br><input type="radio"/> Moderate<br><input type="radio"/> High<br><input checked="" type="checkbox"/> <b>No included studies</b> | No evidence identified. There is no pharmacoeconomic analysis available. | The costs of PDE5is can be obtained from current local price lists. |

**Cost-effectiveness**

Does the cost-effectiveness of the intervention favour the intervention or the comparison?

| Judgement                                                                                                                                                                                                                                                                                                                                                                                               | Research evidence                                            | Additional considerations                                                    |
|---------------------------------------------------------------------------------------------------------------------------------------------------------------------------------------------------------------------------------------------------------------------------------------------------------------------------------------------------------------------------------------------------------|--------------------------------------------------------------|------------------------------------------------------------------------------|
| <input type="radio"/> Favours the comparison<br><input type="radio"/> Probably favours the comparison<br><input type="radio"/> Does not favour either the intervention or the comparison<br><input type="radio"/> Probably favours the intervention<br><input type="radio"/> Favours the intervention<br><input type="radio"/> Varies<br><input checked="" type="checkbox"/> <b>No included studies</b> | No evidence identified. This has not been formally assessed. | There was no cost-effectiveness analysis in the two studies mentioned above. |

**Equity**

What would be the impact on health equity?

| Judgement                                                                                                                                                                                                                                                                                   | Research evidence  | Additional considerations                                                                                                                                             |
|---------------------------------------------------------------------------------------------------------------------------------------------------------------------------------------------------------------------------------------------------------------------------------------------|--------------------|-----------------------------------------------------------------------------------------------------------------------------------------------------------------------|
| <input type="radio"/> Reduced<br><input type="radio"/> Probably reduced<br><input type="radio"/> Probably no impact<br><input type="radio"/> Probably increased<br><input type="radio"/> Increased<br><input type="radio"/> Varies<br><input checked="" type="checkbox"/> <b>Don't know</b> | No data available. | It is difficult to assess the risk of inequity, given the small number of patients included in RCTs, which makes the subgroup/groups at risk of inequity feasibility. |

**Acceptability**

Is the intervention acceptable to key stakeholders?

| Judgement                                                                                                                                                                                                                 | Research evidence       | Additional considerations                                                                                                                                         |
|---------------------------------------------------------------------------------------------------------------------------------------------------------------------------------------------------------------------------|-------------------------|-------------------------------------------------------------------------------------------------------------------------------------------------------------------|
| <input type="radio"/> No<br><input checked="" type="checkbox"/> <b>Probably no</b><br><input type="radio"/> Probably yes<br><input type="radio"/> Yes<br><input type="radio"/> Varies<br><input type="radio"/> Don't know | No evidence identified. | Based on the available evidence and given the conflicting data in heterogenous patient cohorts, stakeholders would unlikely consider the intervention acceptable. |

**Feasibility**

Is the intervention feasible to implement?

| Judgement                                                                                                                                                                                                                 | Research evidence       | Additional considerations                                                                                                                                                                                                                                                                                                                                                                                                                                                       |
|---------------------------------------------------------------------------------------------------------------------------------------------------------------------------------------------------------------------------|-------------------------|---------------------------------------------------------------------------------------------------------------------------------------------------------------------------------------------------------------------------------------------------------------------------------------------------------------------------------------------------------------------------------------------------------------------------------------------------------------------------------|
| <input type="radio"/> No<br><input type="radio"/> Probably no<br><input type="radio"/> Probably yes<br><input checked="" type="checkbox"/> <b>Yes</b><br><input type="radio"/> Varies<br><input type="radio"/> Don't know | No evidence identified. | <p>Implementation of PDE5i therapy in patients with HHpEF-CpcPH would be feasible if there was sufficient evidence suggesting beneficial effects on patient-relevant outcomes to convince the key stakeholders to introduce and reimburse this treatment.</p> <p>There is no barrier to feasibility in the general context, but RHC would be required to establish the diagnosis. Therefore, feasibility would be restricted to facilities experienced with both PH and HF.</p> |

**SUMMARY OF JUDGEMENTS**

|                                                    | Judgement                                   |                                               |                                                                  |                                         |                          |        |                            |
|----------------------------------------------------|---------------------------------------------|-----------------------------------------------|------------------------------------------------------------------|-----------------------------------------|--------------------------|--------|----------------------------|
| <b>Problem</b>                                     | No                                          | Probably no                                   | Probably yes                                                     | <b>Yes</b>                              | NA                       | Varies | Don't know                 |
| <b>Desirable effects</b>                           | <b>Trivial</b>                              | Small                                         | Moderate                                                         | Large                                   | NA                       | Varies | Don't know                 |
| <b>Undesirable effects</b>                         | Large                                       | Moderate                                      | Small                                                            | <b>Trivial</b>                          | NA                       | Varies | Don't know                 |
| <b>Certainty of evidence</b>                       | <b>Very low</b>                             | Low                                           | Moderate                                                         | High                                    | NA                       | NA     | No included studies        |
| <b>Values</b>                                      | <b>Important uncertainty or variability</b> | Possibly important uncertainty or variability | Probably no important uncertainty or variability                 | No important uncertainty or variability | NA                       | NA     | NA                         |
| <b>Balance of effects</b>                          | Favours the comparison                      | Probably favours the comparison               | <b>Does not favour either the intervention or the comparison</b> | Probably favours the intervention       | Favours the intervention | Varies | Don't know                 |
| <b>Resources required</b>                          | Large costs                                 | Moderate costs                                | Negligible costs and savings                                     | Moderate savings                        | Large savings            | Varies | <b>Don't know</b>          |
| <b>Certainty of evidence of required resources</b> | Very low                                    | Low                                           | Moderate                                                         | High                                    | NA                       | NA     | <b>No included studies</b> |
| <b>Cost-effectiveness</b>                          | Favours the comparison                      | Probably favours the comparison               | Does not favour either the intervention or the comparison        | Probably favours the intervention       | Favours the intervention | Varies | <b>No included studies</b> |
| <b>Equity</b>                                      | Reduced                                     | Probably reduced                              | Probably no impact                                               | Probably increased                      | Increased                | Varies | <b>Don't know</b>          |
| <b>Acceptability</b>                               | No                                          | <b>Probably no</b>                            | Probably yes                                                     | Yes                                     | NA                       | Varies | Don't know                 |
| <b>Feasibility</b>                                 | No                                          | Probably no                                   | <b>Probably yes</b>                                              | Yes                                     | NA                       | Varies | Don't know                 |

© ESC/ERS 2022

**TYPE OF RECOMMENDATION: NO RECOMMENDATION ON THE USE OF PDE5i IN PATIENTS WITH HFpEF AND COMBINED POST- AND PRE-CAPILLARY PH**

|                                                |                                                     |                                                                          |                                                 |                                            |
|------------------------------------------------|-----------------------------------------------------|--------------------------------------------------------------------------|-------------------------------------------------|--------------------------------------------|
| Strong recommendation against the intervention | Conditional recommendation against the intervention | Conditional recommendation for either the intervention or the comparison | Conditional recommendation for the intervention | Strong recommendation for the intervention |
| <input type="radio"/>                          | <input type="radio"/>                               | <input type="radio"/>                                                    | <input type="radio"/>                           | <input type="radio"/>                      |

© ESC/ERS 2022

**TYPE OF RECOMMENDATION: CONDITIONAL RECOMMENDATION AGAINST THE USE OF PDE5i IN PATIENTS WITH HFpEF AND ISOLATED POST-CAPILLARY PH**

|                                                |                                                     |                                                                          |                                                 |                                            |
|------------------------------------------------|-----------------------------------------------------|--------------------------------------------------------------------------|-------------------------------------------------|--------------------------------------------|
| Strong recommendation against the intervention | Conditional recommendation against the intervention | Conditional recommendation for either the intervention or the comparison | Conditional recommendation for the intervention | Strong recommendation for the intervention |
| <input type="radio"/>                          | <input checked="" type="checkbox"/>                 | <input type="radio"/>                                                    | <input type="radio"/>                           | <input type="radio"/>                      |

© ESC/ERS 2022

## CONCLUSIONS

### Recommendation

No recommendation can be given for or against the use of PDE5i in patients with HFpEF and combined post- and pre-capillary PH (no recommendation, no identified evidence).

The use of PDE5i in patients with HFpEF and isolated post-capillary PH is not suggested (conditional recommendation, low quality of evidence).

For patients with a severe pre-capillary component (e.g. PVR >5 WU), referral to an expert centre for individual decision-making is recommended.

### Justification

The following considerations were made:

There are no RCTs on PDE5i that specifically enrolled patients with HFpEF and CpcPH. Hence, there are no data from RCTs on the safety, tolerability, and efficacy of PDE5i in this patient population. Harmful effects cannot be excluded, even if the available data from clinical studies, case series, and registries suggest that PDE5i may be safely administered in patients with HFpEF-CpcPH. The additional data identified and included in the GRADE evidence profiles did not enable firm conclusions to be drawn for these specific patient populations. **As a result, a general recommendation cannot be made for the use of PDE5i in patients with HFpEF and CpcPH.**

Case series and registry data indicate that physicians occasionally treat patients with HFpEF-CpcPH with PDE5i, especially those with a severe pre-capillary component (e.g. PVR >5 WU). Case series and registry data also suggest that exercise capacity and RV function may improve in some patients with such a haemodynamic profile with PDE5i treatment. **Based on this, it is recommended that such patients (particularly those with echocardiographic signs of a severe pre-capillary component [e.g. PVR >5 WU] and/or predominant right-sided heart failure) are referred to a PH centre for individualized decision-making.**

The two identified monocentric RCTs with small sample sizes conducted in patients with HFpEF and PH led to conflicting results with low level of evidence. One study in 52 patients with HFpEF and predominantly lpcPH<sup>205</sup> did not demonstrate a benefit on haemodynamics and exercise capacity after 12 weeks of sildenafil therapy. This was confirmed in a long-term analysis of this cohort. Another study in 44 patients with HFpEF and a predominantly CpcPH haemodynamic profile<sup>206</sup> showed improvements in haemodynamics, RV function, and QoL after 6 and 12 months of sildenafil therapy.

Based on these studies, the use of PDE5i is not suggested in patients with HFpEF and lpcPH. The absence of any detectable treatment effect in patients with an lpcPH profile is consistent with the pathophysiological concept that there is no treatable target in the absence of an elevated PVR.

### Subgroup considerations

The Task Force acknowledges that, based on the current evidence, a severe pre-capillary component in HFpEF-CpcPH may be defined by a PVR >5 WU, although this threshold needs to be further validated. In the absence of robust evidence, no further considerations on CpcPH subtypes in patients with HFpEF are provided.

### Implementation considerations

The Task Force believes that, given the current very low level of evidence, any treatment decision-making in HFpEF-CpcPH should be considered in expert centres after careful evaluation. It is acknowledged that the profile of patients who may benefit from treatment with a PDE5i is currently unknown.

### Monitoring and evaluation

Patients with HFpEF-CpcPH should be carefully monitored.

### Research priorities

Further evaluation of the safety and efficacy of PDE5i in patients with HFpEF-CpcPH is considered a research priority, as registry data indicate that PDE5i are used in subsets of patients with HFpEF-CpcPH (especially in those with a severe pre-capillary component), despite the absence of robust data. Prospective RTCs are required to inform on the effects of PDE5i, focusing on safety, tolerability, exercise capacity, QoL, and survival. The survival aspect is crucial, which is why short-term studies alone are insufficient to generate the evidence that is needed to inform the key stakeholders on the safety and efficacy of PDE5i in patients with HFpEF-CpcPH. It may be neither feasible nor necessary to demonstrate improved survival if the intervention shows improvements in patient-relevant outcomes such as exercise capacity and QoL, but it will be necessary to demonstrate that there are no adverse effects on survival.

## 16.3. Evidence to Decision for PICO III

**Table S11** Evidence to Decision for PICO III

### QUESTION

**Should phosphodiesterase type 5 inhibitors be used for patients with severe pulmonary hypertension due to interstitial lung diseases?**

|                     |                                                                            |
|---------------------|----------------------------------------------------------------------------|
| <b>Population</b>   | Patients with severe PH associated with idiopathic interstitial pneumonia. |
| <b>Intervention</b> | Phosphodiesterase type 5 inhibitors.                                       |
| <b>Comparison</b>   | No phosphodiesterase type 5 inhibitors.                                    |

*Continued*



|                              |                                                                                                                                                                                                                                                                                                                                                                                                                                                                                                                                                                                                                                                                                                                                                                                                                          |
|------------------------------|--------------------------------------------------------------------------------------------------------------------------------------------------------------------------------------------------------------------------------------------------------------------------------------------------------------------------------------------------------------------------------------------------------------------------------------------------------------------------------------------------------------------------------------------------------------------------------------------------------------------------------------------------------------------------------------------------------------------------------------------------------------------------------------------------------------------------|
| <b>Main outcomes</b>         | Mortality - right ventricular hypertrophy; mortality - right ventricular systolic dysfunction; mortality - no right ventricular hypertrophy; mortality - no right ventricular systolic dysfunction; safety; partial pressure of arterial oxygen (pO <sub>2</sub> ); exercise capacity - right ventricular hypertrophy; exercise capacity - right ventricular systolic dysfunction; exercise capacity - no right ventricular hypertrophy; exercise capacity - no right ventricular systolic dysfunction; Pulmonary Vascular Resistance Index (PVRI); mean pulmonary arterial pressure (mPAP); quality of life - right ventricular hypertrophy; quality of life - right ventricular systolic dysfunction; quality of life - no right ventricular hypertrophy; quality of life - no right ventricular systolic dysfunction. |
| <b>Setting</b>               | NA                                                                                                                                                                                                                                                                                                                                                                                                                                                                                                                                                                                                                                                                                                                                                                                                                       |
| <b>Perspective</b>           | NA                                                                                                                                                                                                                                                                                                                                                                                                                                                                                                                                                                                                                                                                                                                                                                                                                       |
| <b>Background</b>            | Data from registries show that PDE5is are occasionally used to treat patients with PH-ILD, despite a class III recommendation in previous guidelines.                                                                                                                                                                                                                                                                                                                                                                                                                                                                                                                                                                                                                                                                    |
| <b>Conflict of interests</b> | See COIs for the Task Force.                                                                                                                                                                                                                                                                                                                                                                                                                                                                                                                                                                                                                                                                                                                                                                                             |

© ESC/ERS 2022

## ASSESSMENT

|                                                                                                                                                                                                                        |                                                                                                                                                                                                                                                                                                                                                                                                                                                                                                                                       |                                                                                                                                                                                                                                                                                                                                                                                                                                                                                                                                                                                                                                                                                                                                                                                                                                                       |
|------------------------------------------------------------------------------------------------------------------------------------------------------------------------------------------------------------------------|---------------------------------------------------------------------------------------------------------------------------------------------------------------------------------------------------------------------------------------------------------------------------------------------------------------------------------------------------------------------------------------------------------------------------------------------------------------------------------------------------------------------------------------|-------------------------------------------------------------------------------------------------------------------------------------------------------------------------------------------------------------------------------------------------------------------------------------------------------------------------------------------------------------------------------------------------------------------------------------------------------------------------------------------------------------------------------------------------------------------------------------------------------------------------------------------------------------------------------------------------------------------------------------------------------------------------------------------------------------------------------------------------------|
| <b>Problem</b>                                                                                                                                                                                                         |                                                                                                                                                                                                                                                                                                                                                                                                                                                                                                                                       |                                                                                                                                                                                                                                                                                                                                                                                                                                                                                                                                                                                                                                                                                                                                                                                                                                                       |
| Is the problem a priority?                                                                                                                                                                                             |                                                                                                                                                                                                                                                                                                                                                                                                                                                                                                                                       |                                                                                                                                                                                                                                                                                                                                                                                                                                                                                                                                                                                                                                                                                                                                                                                                                                                       |
| <b>Judgement</b>                                                                                                                                                                                                       | <b>Research evidence</b>                                                                                                                                                                                                                                                                                                                                                                                                                                                                                                              | <b>Additional considerations</b>                                                                                                                                                                                                                                                                                                                                                                                                                                                                                                                                                                                                                                                                                                                                                                                                                      |
| <input type="radio"/> No<br><input type="radio"/> Probably no<br><input type="radio"/> Probably yes<br><input checked="" type="radio"/> <b>Yes</b><br><input type="radio"/> Varies<br><input type="radio"/> Don't know | Registry data indicate that physicians use PDE5is to treat patients with idiopathic interstitial pneumonia (IIP) and PH. There is also data from registries and case series suggesting that PDE5is may be safe in this patient population and that some patients derive clinical benefit. <sup>219</sup> The safety of PDE5is, mainly sildenafil, has been demonstrated in RCTs that enrolled patients with various forms of ILD, but the clinical benefit is unclear, mainly because these trials did not use RHC as entry criteria. | The RISE-IIP study with riociguat, a soluble guanylate cyclase stimulator, in patients with idiopathic interstitial pneumonias, was terminated because of signals increasing a higher risk of clinical worsening events including death. <sup>220</sup> As both PDE5is and riociguat act via the same pathway, it will be critical to obtain survival data with the use of PDE5is.                                                                                                                                                                                                                                                                                                                                                                                                                                                                    |
| <b>Desirable effects</b>                                                                                                                                                                                               |                                                                                                                                                                                                                                                                                                                                                                                                                                                                                                                                       |                                                                                                                                                                                                                                                                                                                                                                                                                                                                                                                                                                                                                                                                                                                                                                                                                                                       |
| How substantial are the desirable anticipated effects?                                                                                                                                                                 |                                                                                                                                                                                                                                                                                                                                                                                                                                                                                                                                       |                                                                                                                                                                                                                                                                                                                                                                                                                                                                                                                                                                                                                                                                                                                                                                                                                                                       |
| <b>Judgement</b>                                                                                                                                                                                                       | <b>Research evidence</b>                                                                                                                                                                                                                                                                                                                                                                                                                                                                                                              | <b>Additional considerations</b>                                                                                                                                                                                                                                                                                                                                                                                                                                                                                                                                                                                                                                                                                                                                                                                                                      |
| <input type="radio"/> Trivial<br><input checked="" type="radio"/> <b>Small</b><br><input type="radio"/> Moderate<br><input type="radio"/> Large<br><input type="radio"/> Varies<br><input type="radio"/> Don't know    | Sildenafil given as single dose of 50 mg acutely improved pulmonary vascular resistance and oxygenation in patients with PH associated with pulmonary fibrosis. In patients with ILD and right ventricular dysfunction, exercise capacity may be better preserved and QoL may be improved with sildenafil and placebo.                                                                                                                                                                                                                | Most of the available data come from studies that did not include patients with ILD and documented PH. Additional studies that were considered were STEP-IPF <sup>221</sup> and the INSTAGE study <sup>222</sup> ; both studies included patients with idiopathic pulmonary fibrosis without documented PH; STEP-IPF did not meet its primary endpoint (increase in 6MWD by ≥20%), but showed improvement in QoL with the use of sildenafil. INSTAGE did not confirm this finding and was negative for all outcome measures. Both studies did not find safety signals of concern. Registry data suggest that some patients with ILD and documented PH may improve exercise capacity with PDE5i therapy, especially when PH is severe. <sup>219</sup> So far, there is no indication that this intervention improves survival of patients with PH-ILD. |
| <b>Undesirable effects</b>                                                                                                                                                                                             |                                                                                                                                                                                                                                                                                                                                                                                                                                                                                                                                       |                                                                                                                                                                                                                                                                                                                                                                                                                                                                                                                                                                                                                                                                                                                                                                                                                                                       |
| How substantial are the undesirable anticipated effects?                                                                                                                                                               |                                                                                                                                                                                                                                                                                                                                                                                                                                                                                                                                       |                                                                                                                                                                                                                                                                                                                                                                                                                                                                                                                                                                                                                                                                                                                                                                                                                                                       |
| <b>Judgement</b>                                                                                                                                                                                                       | <b>Research evidence</b>                                                                                                                                                                                                                                                                                                                                                                                                                                                                                                              | <b>Additional considerations</b>                                                                                                                                                                                                                                                                                                                                                                                                                                                                                                                                                                                                                                                                                                                                                                                                                      |
| <input type="radio"/> Large<br><input checked="" type="radio"/> <b>Moderate</b><br><input type="radio"/> Small<br><input type="radio"/> Trivial<br><input type="radio"/> Varies<br><input type="radio"/> Don't know    | No adverse events were noted with the administration of sildenafil as a single dose of 50 mg in patients with PH-ILD. Adverse events were not reported in the study by Han <i>et al.</i> <sup>207</sup>                                                                                                                                                                                                                                                                                                                               | The potential for undesirable effects of PDE5is in patients with PH-ILD is unclear. Well-known side effects of PDE5is—such as headache, heartburn, and diarrhoea—have been reported to occur in patients with PH-ILD with a similar frequency as in patients with other conditions. In patients with PH-ILD, long-term administration of PDE5is may have detrimental effects on oxygenation, but this has not been sufficiently explored.                                                                                                                                                                                                                                                                                                                                                                                                             |

Continued

| <b>Certainty of evidence</b>                                                                                                                                                                                                                                                                                                                                                                                     |                                                                                                                                       |                                                                                                                                                                                                                                                                                                                                                                      |
|------------------------------------------------------------------------------------------------------------------------------------------------------------------------------------------------------------------------------------------------------------------------------------------------------------------------------------------------------------------------------------------------------------------|---------------------------------------------------------------------------------------------------------------------------------------|----------------------------------------------------------------------------------------------------------------------------------------------------------------------------------------------------------------------------------------------------------------------------------------------------------------------------------------------------------------------|
| What is the overall certainty of the evidence of effects?                                                                                                                                                                                                                                                                                                                                                        |                                                                                                                                       |                                                                                                                                                                                                                                                                                                                                                                      |
| <b>Judgement</b>                                                                                                                                                                                                                                                                                                                                                                                                 | <b>Research evidence</b>                                                                                                              | <b>Additional considerations</b>                                                                                                                                                                                                                                                                                                                                     |
| <input checked="" type="checkbox"/> <b>Very low</b><br><input type="checkbox"/> Low<br><input type="checkbox"/> Moderate<br><input type="checkbox"/> High<br><input type="checkbox"/> No included studies                                                                                                                                                                                                        | Very low based on the lowest score for critical outcomes.                                                                             | There is no evidence on the safety, tolerability, and efficacy of PDE5is from RCTs in patients with PH-ILD.                                                                                                                                                                                                                                                          |
| <b>Values</b>                                                                                                                                                                                                                                                                                                                                                                                                    |                                                                                                                                       |                                                                                                                                                                                                                                                                                                                                                                      |
| Is there important uncertainty about or variability in how much people value the main outcomes?                                                                                                                                                                                                                                                                                                                  |                                                                                                                                       |                                                                                                                                                                                                                                                                                                                                                                      |
| <b>Judgement</b>                                                                                                                                                                                                                                                                                                                                                                                                 | <b>Research evidence</b>                                                                                                              | <b>Additional considerations</b>                                                                                                                                                                                                                                                                                                                                     |
| <input type="checkbox"/> Important uncertainty or variability<br><input type="checkbox"/> Possibly important uncertainty or variability<br><input checked="" type="checkbox"/> <b>Probably no important uncertainty or variability</b><br><input type="checkbox"/> No important uncertainty or variability                                                                                                       | No evidence identified.                                                                                                               | While there are no data on how patients with PH-ILD value major outcomes, there is evidence from other forms of PH that important patient-related outcomes include exercise capacity, breathlessness, QoL, and survival. There is no reason to assume that patients with PH-ILD have a different perspective on these outcomes than patients with other forms of PH. |
| <b>Balance of effects</b>                                                                                                                                                                                                                                                                                                                                                                                        |                                                                                                                                       |                                                                                                                                                                                                                                                                                                                                                                      |
| Does the balance between desirable and undesirable effects favour the intervention or the comparison?                                                                                                                                                                                                                                                                                                            |                                                                                                                                       |                                                                                                                                                                                                                                                                                                                                                                      |
| <b>Judgement</b>                                                                                                                                                                                                                                                                                                                                                                                                 | <b>Research evidence</b>                                                                                                              | <b>Additional considerations</b>                                                                                                                                                                                                                                                                                                                                     |
| <input type="checkbox"/> Favours the comparison<br><input type="checkbox"/> Probably favours the comparison<br><input type="checkbox"/> Does not favour either the intervention or the comparison<br><input type="checkbox"/> Probably favours the intervention<br><input type="checkbox"/> Favours the intervention<br><input type="checkbox"/> Varies<br><input checked="" type="checkbox"/> <b>Don't know</b> | The current evidence is insufficient to determine the balance of desirable and undesirable effects of PDE5is in patients with PH-ILD. | NA                                                                                                                                                                                                                                                                                                                                                                   |
| <b>Resources required</b>                                                                                                                                                                                                                                                                                                                                                                                        |                                                                                                                                       |                                                                                                                                                                                                                                                                                                                                                                      |
| How large are the resource requirements (costs)?                                                                                                                                                                                                                                                                                                                                                                 |                                                                                                                                       |                                                                                                                                                                                                                                                                                                                                                                      |
| <b>Judgement</b>                                                                                                                                                                                                                                                                                                                                                                                                 | <b>Research evidence</b>                                                                                                              | <b>Additional considerations</b>                                                                                                                                                                                                                                                                                                                                     |
| <input type="checkbox"/> Large costs<br><input checked="" type="checkbox"/> <b>Moderate costs</b><br><input type="checkbox"/> Negligible costs and savings<br><input type="checkbox"/> Moderate savings<br><input type="checkbox"/> Large savings<br><input type="checkbox"/> Varies<br><input type="checkbox"/> Don't know                                                                                      | No evidence identified.                                                                                                               | The costs of the intervention vary between countries but are generally considered moderate.                                                                                                                                                                                                                                                                          |

Continued

**Certainty of evidence of required resources**

What is the certainty of the evidence of resource requirements (costs)?

| Judgement                                                                                                                                                                                  | Research evidence       | Additional considerations                                           |
|--------------------------------------------------------------------------------------------------------------------------------------------------------------------------------------------|-------------------------|---------------------------------------------------------------------|
| <input checked="" type="radio"/> <b>Very low</b><br><input type="radio"/> Low<br><input type="radio"/> Moderate<br><input type="radio"/> High<br><input type="radio"/> No included studies | No evidence identified. | The costs of PDE5is can be obtained from current local price lists. |

**Cost-effectiveness**

Does the cost-effectiveness of the intervention favour the intervention or the comparison?

| Judgement                                                                                                                                                                                                                                                                                                                                                                                            | Research evidence       | Additional considerations |
|------------------------------------------------------------------------------------------------------------------------------------------------------------------------------------------------------------------------------------------------------------------------------------------------------------------------------------------------------------------------------------------------------|-------------------------|---------------------------|
| <input type="radio"/> Favours the comparison<br><input type="radio"/> Probably favours the comparison<br><input type="radio"/> Does not favour either the intervention or the comparison<br><input type="radio"/> Probably favours the intervention<br><input type="radio"/> Favours the intervention<br><input type="radio"/> Varies<br><input checked="" type="radio"/> <b>No included studies</b> | No evidence identified. | NA                        |

**Equity**

What would be the impact on health equity?

| Judgement                                                                                                                                                                                                                                                                                | Research evidence  | Additional considerations |
|------------------------------------------------------------------------------------------------------------------------------------------------------------------------------------------------------------------------------------------------------------------------------------------|--------------------|---------------------------|
| <input type="radio"/> Reduced<br><input type="radio"/> Probably reduced<br><input type="radio"/> Probably no impact<br><input type="radio"/> Probably increased<br><input type="radio"/> Increased<br><input type="radio"/> Varies<br><input checked="" type="radio"/> <b>Don't know</b> | No data available. | NA                        |

**Acceptability**

Is the intervention acceptable to key stakeholders?

| Judgement                                                                                                                                                                                                              | Research evidence       | Additional considerations                                                                                      |
|------------------------------------------------------------------------------------------------------------------------------------------------------------------------------------------------------------------------|-------------------------|----------------------------------------------------------------------------------------------------------------|
| <input checked="" type="radio"/> <b>No</b><br><input type="radio"/> Probably no<br><input type="radio"/> Probably yes<br><input type="radio"/> Yes<br><input type="radio"/> Varies<br><input type="radio"/> Don't know | No evidence identified. | Based on the available evidence, the intervention will not be acceptable for patients, physicians, and payers. |

**Feasibility**

Is the intervention feasible to implement?

| Judgement                                                                                                                                                                                                              | Research evidence       | Additional considerations                                                                                                                                                                                                                         |
|------------------------------------------------------------------------------------------------------------------------------------------------------------------------------------------------------------------------|-------------------------|---------------------------------------------------------------------------------------------------------------------------------------------------------------------------------------------------------------------------------------------------|
| <input type="radio"/> No<br><input type="radio"/> Probably no<br><input type="radio"/> Probably yes<br><input checked="" type="radio"/> <b>Yes</b><br><input type="radio"/> Varies<br><input type="radio"/> Don't know | No evidence identified. | Implementation of PDE5i therapy in patients with PH-ILD would be feasible if there was sufficient evidence suggesting beneficial effects on patient relevant outcomes to convince the key stakeholders to introduce and reimburse this treatment. |

## SUMMARY OF JUDGEMENTS

|                                                    | Judgement                            |                                               |                                                                  |                                         |                          |        |                            |
|----------------------------------------------------|--------------------------------------|-----------------------------------------------|------------------------------------------------------------------|-----------------------------------------|--------------------------|--------|----------------------------|
| <b>Problem</b>                                     | No                                   | Probably no                                   | Probably yes                                                     | <b>Yes</b>                              | NA                       | Varies | Don't know                 |
| <b>Desirable effects</b>                           | Trivial                              | Small                                         | <b>Moderate</b>                                                  | Large                                   | NA                       | Varies | Don't know                 |
| <b>Undesirable effects</b>                         | Large                                | <b>Moderate</b>                               | Small                                                            | Trivial                                 | NA                       | Varies | Don't know                 |
| <b>Certainty of evidence</b>                       | <b>Very low</b>                      | Low                                           | Moderate                                                         | High                                    | NA                       | NA     | No included studies        |
| <b>Values</b>                                      | Important uncertainty or variability | Possibly important uncertainty or variability | <b>Probably no important uncertainty or variability</b>          | No important uncertainty or variability | NA                       | NA     | NA                         |
| <b>Balance of effects</b>                          | Favours the comparison               | Probably favours the comparison               | <b>Does not favour either the intervention or the comparison</b> | Probably favours the intervention       | Favours the intervention | Varies | Don't know                 |
| <b>Resources required</b>                          | Large costs                          | <b>Moderate costs</b>                         | Negligible costs and savings                                     | Moderate savings                        | Large savings            | Varies | Don't know                 |
| <b>Certainty of evidence of required resources</b> | Very low                             | Low                                           | Moderate                                                         | High                                    | NA                       | NA     | <b>No included studies</b> |
| <b>Cost-effectiveness</b>                          | Favours the comparison               | Probably favours the comparison               | Does not favour either the intervention or the comparison        | Probably favours the intervention       | Favours the intervention | Varies | <b>No included studies</b> |
| <b>Equity</b>                                      | Reduced                              | Probably reduced                              | Probably no impact                                               | Probably increased                      | Increased                | Varies | <b>Don't know</b>          |
| <b>Acceptability</b>                               | No                                   | Probably no                                   | <b>Probably yes</b>                                              | Yes                                     | NA                       | Varies | Don't know                 |
| <b>Feasibility</b>                                 | No                                   | Probably no                                   | Probably yes                                                     | <b>Yes</b>                              | NA                       | Varies | Don't know                 |

© ESC/ERS 2022

## TYPE OF RECOMMENDATION

|                                                |                                                     |                                                                          |                                                 |                                            |
|------------------------------------------------|-----------------------------------------------------|--------------------------------------------------------------------------|-------------------------------------------------|--------------------------------------------|
| Strong recommendation against the intervention | Conditional recommendation against the intervention | Conditional recommendation for either the intervention or the comparison | Conditional recommendation for the intervention | Strong recommendation for the intervention |
| <input type="radio"/>                          | <input checked="" type="checkbox"/>                 | <input type="radio"/>                                                    | <input type="radio"/>                           | <input type="radio"/>                      |

© ESC/ERS 2022

## CONCLUSIONS

**Recommendations**

The use of PDE5i in patients with ILD and non-severe PH is currently not recommended (conditional recommendation against the intervention, very low quality of evidence). For patients with ILD and severe PH, individual decision-making is recommended.

**Justification**

There is no direct data from RCTs on the safety, tolerability, and efficacy of PDE5is in patients with PH-ILD. The indirect data we included does not allow us to draw firm conclusions. Harmful effects cannot be excluded even if case series and registry data suggest that PDE5is may be safely administered in patients with PH-ILD. Case series and registry data indicate that some patients with PH-ILD are receiving PDE5i therapy, especially those with severe PH (with variable criteria having been used for defining severe PH). Case series and registry data also suggest that some patients with PH-ILD seem to benefit from PDE5i treatment. Given the lack of robust evidence, the Task Force members felt unable to provide a recommendation for or against the use of PDE5is in patients with ILD and severe PH, and recommend that these patients are referred to a PH centre for individualized decision-making. For patients with ILD and non-severe PH, it is not recommended to use PDE5is.

Continued

**Subgroup considerations**

In the absence of evidence, no further considerations on ILD subtypes are provided.

**Implementation considerations**

The Task Force believes that, given the current levels of evidence, PDE5i therapy should not be used in most patients with PH-ILD. However, it is acknowledged that there are patients with ILD and severe PH who may benefit from PDE5i treatment. In the absence of robust evidence, this decision should be made individually in PH centres. It is acknowledged that PDE5is are not approved for patients with PH-ILD and that reimbursement will depend on local regulations.

**Monitoring and evaluation**

Patients with PH-ILD who are being treated with PDE5is should be carefully monitored for efficacy and safety. Such monitoring should include measurements of oxygenation, which may deteriorate with PDE5i treatment.

**Research priorities**

Further evaluation of the safety and efficacy of PDE5is in patients with PH-ILD is considered a research priority, as registry data indicate that PDE5is are widely used in patients with PH-ILD (especially in those with severe PH), despite the absence of robust data. Prospective RCTs are required, which should inform on the effects of PDE5is, focusing on safety, tolerability, exercise capacity, QoL, and survival. The survival aspect is crucial, which is why short-term studies alone are insufficient to generate the evidence that is needed to inform the key stakeholders on the safety and efficacy of PDE5is in patients with PH-ILD. It may be neither feasible nor necessary to demonstrate improved survival if the intervention shows improvements in patient-relevant outcomes such as exercise capacity and QoL, but it will be necessary to demonstrate that there are no adverse effects on survival.

© ESC/ERS 2022

## 16.4. Evidence to Decision for PICO IV

**Table S12 Evidence to Decision for PICO IV**

**QUESTION**

**Should patients with chronic thrombo-embolic pulmonary hypertension who are considered inoperable but candidates for balloon pulmonary angioplasty receive medical therapy before interventional therapy is initiated?**

|                              |                                                                                                                                                                                         |
|------------------------------|-----------------------------------------------------------------------------------------------------------------------------------------------------------------------------------------|
| <b>Population</b>            | Patients with chronic thrombo-embolic pulmonary hypertension who are considered inoperable but candidates for balloon pulmonary angioplasty (BPA).                                      |
| <b>Intervention</b>          | Medical therapy before BPA.                                                                                                                                                             |
| <b>Comparison</b>            | BPA without medical pre-treatment.                                                                                                                                                      |
| <b>Main outcomes</b>         | Critical outcomes: survival, hospitalization, clinical worsening, exercise capacity, lung injury, and safety.<br>Important outcomes: pulmonary vascular resistance and quality of life. |
| <b>Setting</b>               | Placebo-controlled clinical trials and case series reporting invasive haemodynamics were considered for analysis.                                                                       |
| <b>Perspective</b>           | NA                                                                                                                                                                                      |
| <b>Background</b>            | NA                                                                                                                                                                                      |
| <b>Conflict of interests</b> | See the COI declaration of the whole Task Force.                                                                                                                                        |

© ESC/ERS 2022

**ASSESSMENT**

**Problem**

Is the problem a priority?

| <b>Judgement</b>                                                                                                                                                                                                          | <b>Research evidence</b>                                                                                                                                                                                                                                                                                                                                                                                                                                                                                                                                                                                                                                                                                 | <b>Additional considerations</b> |
|---------------------------------------------------------------------------------------------------------------------------------------------------------------------------------------------------------------------------|----------------------------------------------------------------------------------------------------------------------------------------------------------------------------------------------------------------------------------------------------------------------------------------------------------------------------------------------------------------------------------------------------------------------------------------------------------------------------------------------------------------------------------------------------------------------------------------------------------------------------------------------------------------------------------------------------------|----------------------------------|
| <input type="radio"/> No<br><input type="radio"/> Probably no<br><input type="radio"/> Probably yes<br><input checked="" type="checkbox"/> <b>Yes</b><br><input type="radio"/> Varies<br><input type="radio"/> Don't know | There is evidence from an RCT that medical therapy is improving PVR and 6MWT in patients with inoperable CTEPH, but this does not normalize the haemodynamics. There are data from retrospective studies that series of BPA interventions can normalize the haemodynamics, but BPA is associated with periprocedural complications including deaths. Until now, there is no evidence that medical therapy introduced prior to BPA intervention can improve outcome (improved haemodynamics, functional status, and safety during BPA procedures). Although case series or retrospective analysis suggest a benefit from the interventions, there is a need to establish specific therapies through RCTs. | NA                               |

Continued

**Desirable effects**

How substantial are the desirable anticipated effects?

| Judgement                                                                                                                                                                                                           | Research evidence                                                                                                                                                                                                                                                                                                                                                                                                                                                                                                                                                                                                                                                                                                                                                                                                                                                                                                                                              | Additional considerations                                                                                                                                                                                                                                                                                                    |
|---------------------------------------------------------------------------------------------------------------------------------------------------------------------------------------------------------------------|----------------------------------------------------------------------------------------------------------------------------------------------------------------------------------------------------------------------------------------------------------------------------------------------------------------------------------------------------------------------------------------------------------------------------------------------------------------------------------------------------------------------------------------------------------------------------------------------------------------------------------------------------------------------------------------------------------------------------------------------------------------------------------------------------------------------------------------------------------------------------------------------------------------------------------------------------------------|------------------------------------------------------------------------------------------------------------------------------------------------------------------------------------------------------------------------------------------------------------------------------------------------------------------------------|
| <input type="radio"/> Trivial<br><input checked="" type="radio"/> <b>Small</b><br><input type="radio"/> Moderate<br><input type="radio"/> Large<br><input type="radio"/> Varies<br><input type="radio"/> Don't know | <p>Only the RACE RCT<sup>223,224</sup> provided efficacy data for this question. Riociguat therapy before BPA compared with BPA had no significant effect on 6MWD at 52 weeks [mean difference (MD) = 5 metres; 95% CI, -41.22, 51.22; 67 participants; very low certainty] and no significant effect on PVR at 52 weeks (MD = 0.2 WU; 95% CI, -0.39, 0.79; 67 participants; very low certainty).</p> <p>The RACE trial also reported on two additional outcomes that had not been considered critical or important by the Guideline panel: PAP and cardiac output. Given the fact that there were limited data for this question, it was decided a posteriori to also consider these outcomes. Riociguat therapy before BPA compared with BPA resulted in higher mean PAP at 52 weeks (MD = 5 mmHg; 95% CI, 2.11, 7.89; 67 patients; very low certainty) and higher cardiac output (MD = 0.6 L/min; 95% CI, 0.02, 1.18; 67 patients; very low certainty).</p> | <p>In a prospective single-centre study, 36 consecutive patients with inoperable CTEPH were treated with riociguat before BPA.<sup>225</sup> Significant improvements in pulmonary haemodynamics and physical capacity were observed for riociguat treatment, and subsequent BPA interventions yielded further benefits.</p> |

**Undesirable effects**

How substantial are the undesirable anticipated effects?

| Judgement                                                                                                                                                                                                           | Research evidence                                                                                                                                                                                                                                                                                                                                                                                                                                                                                                                                                                                                                                                                                                                                                                                                                                                                                                                                                                                                                                                                                                                                                                                                                                                                                | Additional considerations                                                                                                         |
|---------------------------------------------------------------------------------------------------------------------------------------------------------------------------------------------------------------------|--------------------------------------------------------------------------------------------------------------------------------------------------------------------------------------------------------------------------------------------------------------------------------------------------------------------------------------------------------------------------------------------------------------------------------------------------------------------------------------------------------------------------------------------------------------------------------------------------------------------------------------------------------------------------------------------------------------------------------------------------------------------------------------------------------------------------------------------------------------------------------------------------------------------------------------------------------------------------------------------------------------------------------------------------------------------------------------------------------------------------------------------------------------------------------------------------------------------------------------------------------------------------------------------------|-----------------------------------------------------------------------------------------------------------------------------------|
| <input type="radio"/> Large<br><input type="radio"/> Moderate<br><input checked="" type="radio"/> <b>Small</b><br><input type="radio"/> Trivial<br><input type="radio"/> Varies<br><input type="radio"/> Don't know | <p>Only the RACE RCT<sup>223,224</sup> provided safety data for this question. Riociguat therapy before BPA compared with BPA resulted in lower risk of adverse events (AE) and/or severe adverse events (SAE) related to BPA during 26 weeks (absolute risk = 283 fewer patients with <math>\geq 1</math> AE and/or SAE related to BPA per 1000 patients; 95% CI, from 412 to 62 fewer patients, 88 patients; very low certainty). Riociguat before BPA lowered the risk of SAE related to BPA during 26 weeks (absolute risk = 283 fewer participants with <math>\geq 1</math> SAE related to BPA per 1000 patients; 95% CI, from 364 to 89 fewer patients; 88 patients; very low certainty). Riociguat before BPA was also safer compared to BPA when severe BPA procedure-related complications were analysed during 26 weeks (absolute risk = 263 fewer patients with <math>\geq 1</math> severe BPA procedure-related complications, from 318 to 83 fewer patients; 88 patients; very low certainty).</p> <p>However, there was similar risk of AE related to BPA when comparing riociguat+BPA and BPA (absolute risk = 88 fewer patients with <math>\geq 1</math> AE related to BPA per 1000 patients; 95% CI, from 219 fewer to 161 more patients; 88 patients; very low certainty).</p> | <p>Riociguat initiated prior to BPA may improve the safety of BPA, most likely by optimizing pre-BPA pulmonary haemodynamics.</p> |

**Certainty of evidence**

What is the overall certainty of the evidence of effects?

| Judgement                                                                                                                                                                                  | Research evidence                                               | Additional considerations                                                                                                                                                                   |
|--------------------------------------------------------------------------------------------------------------------------------------------------------------------------------------------|-----------------------------------------------------------------|---------------------------------------------------------------------------------------------------------------------------------------------------------------------------------------------|
| <input checked="" type="radio"/> <b>Very low</b><br><input type="radio"/> Low<br><input type="radio"/> Moderate<br><input type="radio"/> High<br><input type="radio"/> No included studies | <p>Based on the low level of quality for critical outcomes.</p> | <p>The presence of one RCT, one small size single-centre prospective study, and one retrospective single-centre study provided limited evidence to the analysed data.<sup>225,226</sup></p> |

Continued

|                                                                                                                                                                                                                                                                                                                                                                                                                                                             |                                                                                                                                                                                                                                                                                                                                                                                                                                                               |                                                                                                                                                                                                                                                                                                                                                                                                                                                                         |
|-------------------------------------------------------------------------------------------------------------------------------------------------------------------------------------------------------------------------------------------------------------------------------------------------------------------------------------------------------------------------------------------------------------------------------------------------------------|---------------------------------------------------------------------------------------------------------------------------------------------------------------------------------------------------------------------------------------------------------------------------------------------------------------------------------------------------------------------------------------------------------------------------------------------------------------|-------------------------------------------------------------------------------------------------------------------------------------------------------------------------------------------------------------------------------------------------------------------------------------------------------------------------------------------------------------------------------------------------------------------------------------------------------------------------|
| <p><b>Values</b></p> <p>Is there important uncertainty about or variability in how much people value the main outcomes?</p>                                                                                                                                                                                                                                                                                                                                 |                                                                                                                                                                                                                                                                                                                                                                                                                                                               |                                                                                                                                                                                                                                                                                                                                                                                                                                                                         |
| <p><b>Judgement</b></p> <p><input type="radio"/> Important uncertainty or variability</p> <p><input checked="" type="radio"/> <b>Possibly important uncertainty or variability</b></p> <p><input type="radio"/> Probably no important uncertainty or variability</p> <p><input type="radio"/> No important uncertainty or variability</p>                                                                                                                   | <p><b>Research evidence</b></p> <p>No evidence on values and preferences from the included study.</p>                                                                                                                                                                                                                                                                                                                                                         | <p><b>Additional considerations</b></p> <p>Quality of life was measured in a single centre study showing improvement in QoL with BPA. Hug KP, <i>et al.</i><sup>226</sup></p> <p>Clinical experience from several centres across the world shows functional improvement on top of haemodynamic improvement.</p> <p>Given the diverse populations and practice, the studies retained for analysis provide consistency to support a possible positive recommendation.</p> |
| <p><b>Balance of effects</b></p> <p>Does the balance between desirable and undesirable effects favour the intervention or the comparison?</p>                                                                                                                                                                                                                                                                                                               |                                                                                                                                                                                                                                                                                                                                                                                                                                                               |                                                                                                                                                                                                                                                                                                                                                                                                                                                                         |
| <p><b>Judgement</b></p> <p><input type="radio"/> Favours the comparison</p> <p><input type="radio"/> Probably favours the comparison</p> <p><input type="radio"/> Does not favour either the intervention or the comparison</p> <p><input checked="" type="radio"/> <b>Probably favours the intervention</b></p> <p><input type="radio"/> Favours the intervention</p> <p><input type="radio"/> Varies</p> <p><input type="radio"/> Don't know</p>          | <p><b>Research evidence</b></p> <p>Although the decrease in PVR at 1 year was similar regardless of the first-line treatment that was used (BPA or riociguat) and there was no significant difference between BPA and riociguat used as first-line therapy for change in 6MWD at 1 year (+46 m vs. +58 m), the incidence of SAE related to BPA was much lower when BPA was preceded by 6 months of treatment with riociguat compared with BPA first line.</p> | <p><b>Additional considerations</b></p> <p>Additional clinical worldwide experience shows that BPA is safer after pre-treatment with medical therapy.</p>                                                                                                                                                                                                                                                                                                               |
| <p><b>Resources required</b></p> <p>How large are the resource requirements (costs)?</p>                                                                                                                                                                                                                                                                                                                                                                    |                                                                                                                                                                                                                                                                                                                                                                                                                                                               |                                                                                                                                                                                                                                                                                                                                                                                                                                                                         |
| <p><b>Judgement</b></p> <p><input type="radio"/> Large costs</p> <p><input type="radio"/> Moderate costs</p> <p><input type="radio"/> Negligible costs and savings</p> <p><input type="radio"/> Moderate savings</p> <p><input type="radio"/> Large savings</p> <p><input type="radio"/> Varies</p> <p><input checked="" type="radio"/> <b>Don't know</b></p>                                                                                               | <p><b>Research evidence</b></p> <p>There is no cost-effectiveness analysis in the included study.</p>                                                                                                                                                                                                                                                                                                                                                         | <p><b>Additional considerations</b></p> <p>The cost of the intervention is variable between countries.</p>                                                                                                                                                                                                                                                                                                                                                              |
| <p><b>Certainty of evidence of required resources</b></p> <p>What is the certainty of the evidence of resource requirements (costs)?</p>                                                                                                                                                                                                                                                                                                                    |                                                                                                                                                                                                                                                                                                                                                                                                                                                               |                                                                                                                                                                                                                                                                                                                                                                                                                                                                         |
| <p><b>Judgement</b></p> <p><input type="radio"/> Very low</p> <p><input type="radio"/> Low</p> <p><input type="radio"/> Moderate</p> <p><input type="radio"/> High</p> <p><input checked="" type="radio"/> <b>No included studies</b></p>                                                                                                                                                                                                                   | <p><b>Research evidence</b></p> <p>There is no health economic analysis provided in the included study.</p>                                                                                                                                                                                                                                                                                                                                                   | <p><b>Additional considerations</b></p> <p>See above.</p>                                                                                                                                                                                                                                                                                                                                                                                                               |
| <p><b>Cost-effectiveness</b></p> <p>Does the cost-effectiveness of the intervention favour the intervention or the comparison?</p>                                                                                                                                                                                                                                                                                                                          |                                                                                                                                                                                                                                                                                                                                                                                                                                                               |                                                                                                                                                                                                                                                                                                                                                                                                                                                                         |
| <p><b>Judgement</b></p> <p><input type="radio"/> Favours the comparison</p> <p><input type="radio"/> Probably favours the comparison</p> <p><input type="radio"/> Does not favour either the intervention or the comparison</p> <p><input type="radio"/> Probably favours the intervention</p> <p><input type="radio"/> Favours the intervention</p> <p><input type="radio"/> Varies</p> <p><input checked="" type="radio"/> <b>No included studies</b></p> | <p><b>Research evidence</b></p> <p>There is no cost-effectiveness analysis in the included study.</p>                                                                                                                                                                                                                                                                                                                                                         | <p><b>Additional considerations</b></p> <p>NA</p>                                                                                                                                                                                                                                                                                                                                                                                                                       |

Continued

| <b>Equity</b><br>What would be the impact on health equity?                                                                                                                                                                                                                              |                                                                        |                                                                                              |
|------------------------------------------------------------------------------------------------------------------------------------------------------------------------------------------------------------------------------------------------------------------------------------------|------------------------------------------------------------------------|----------------------------------------------------------------------------------------------|
| Judgement                                                                                                                                                                                                                                                                                | Research evidence                                                      | Additional considerations                                                                    |
| <input type="radio"/> Reduced<br><input type="radio"/> Probably reduced<br><input type="radio"/> Probably no impact<br><input type="radio"/> Probably increased<br><input type="radio"/> Increased<br><input type="radio"/> Varies<br><input checked="" type="radio"/> <b>Don't know</b> | There is no evidence from the included trial supporting such analysis. | It is difficult to assess the risk of inequity, given the small number of patients included. |

  

| <b>Acceptability</b><br>Is the intervention acceptable to key stakeholders?                                                                                                                                            |                   |                                                                                                       |
|------------------------------------------------------------------------------------------------------------------------------------------------------------------------------------------------------------------------|-------------------|-------------------------------------------------------------------------------------------------------|
| Judgement                                                                                                                                                                                                              | Research evidence | Additional considerations                                                                             |
| <input type="radio"/> No<br><input type="radio"/> Probably no<br><input checked="" type="radio"/> <b>Probably yes</b><br><input type="radio"/> Yes<br><input type="radio"/> Varies<br><input type="radio"/> Don't know | NA                | Given the limiting but encouraging evidence, stakeholders might consider the intervention acceptable. |

  

| <b>Feasibility</b><br>Is the intervention feasible to implement?                                                                                                                                                       |                   |                                                                                                                                                                                                                                                                          |
|------------------------------------------------------------------------------------------------------------------------------------------------------------------------------------------------------------------------|-------------------|--------------------------------------------------------------------------------------------------------------------------------------------------------------------------------------------------------------------------------------------------------------------------|
| Judgement                                                                                                                                                                                                              | Research evidence | Additional considerations                                                                                                                                                                                                                                                |
| <input type="radio"/> No<br><input type="radio"/> Probably no<br><input checked="" type="radio"/> <b>Probably yes</b><br><input type="radio"/> Yes<br><input type="radio"/> Varies<br><input type="radio"/> Don't know | NA                | There is no real barrier to feasibility in the general context of the management of CTPH. However, as BPA is a highly specialized intervention, feasibility would be restricted to facilities treating CTPH. In other words, this would be unfeasible in all facilities. |

© ESC/ERS 2022

**SUMMARY OF JUDGEMENTS**

|                                                    | <b>Judgement</b>                     |                                                      |                                                           |                                          |                          |        |                            |
|----------------------------------------------------|--------------------------------------|------------------------------------------------------|-----------------------------------------------------------|------------------------------------------|--------------------------|--------|----------------------------|
| <b>Problem</b>                                     | No                                   | Probably no                                          | Probably yes                                              | <b>Yes</b>                               | NA                       | Varies | Don't know                 |
| <b>Desirable effects</b>                           | Trivial                              | <b>Small</b>                                         | Moderate                                                  | Large                                    | NA                       | Varies | Don't know                 |
| <b>Undesirable effects</b>                         | Large                                | Moderate                                             | <b>Small</b>                                              | Trivial                                  | NA                       | Varies | Don't know                 |
| <b>Certainty of evidence</b>                       | <b>Very low</b>                      | Low                                                  | Moderate                                                  | High                                     | NA                       | NA     | No included studies        |
| <b>Values</b>                                      | Important uncertainty or variability | <b>Possibly important uncertainty or variability</b> | Probably no important uncertainty or variability          | No important uncertainty or variability  | NA                       | NA     | NA                         |
| <b>Balance of effects</b>                          | Favours the comparison               | Probably favours the comparison                      | Does not favour either the intervention or the comparison | <b>Probably favours the intervention</b> | Favours the intervention | Varies | Don't know                 |
| <b>Resources required</b>                          | Large costs                          | Moderate costs                                       | Negligible costs and savings                              | Moderate savings                         | Large savings            | Varies | <b>Don't know</b>          |
| <b>Certainty of evidence of required resources</b> | Very low                             | Low                                                  | Moderate                                                  | High                                     | NA                       | NA     | <b>No included studies</b> |

Continued



|                           |                        |                                 |                                                           |                                   |                          |        |                            |
|---------------------------|------------------------|---------------------------------|-----------------------------------------------------------|-----------------------------------|--------------------------|--------|----------------------------|
| <b>Cost-effectiveness</b> | Favours the comparison | Probably favours the comparison | Does not favour either the intervention or the comparison | Probably favours the intervention | Favours the intervention | Varies | <b>No included studies</b> |
| <b>Equity</b>             | Reduced                | Probably reduced                | Probably no impact                                        | Probably increased                | Increased                | Varies | <b>Don't know</b>          |
| <b>Acceptability</b>      | No                     | Probably no                     | <b>Probably yes</b>                                       | Yes                               | NA                       | Varies | Don't know                 |
| <b>Feasibility</b>        | No                     | Probably no                     | <b>Probably yes</b>                                       | Yes                               | NA                       | Varies | Don't know                 |

© ESC/ERS 2022

**TYPE OF RECOMMENDATION**

|                                                |                                                     |                                                                          |                                                 |                                            |
|------------------------------------------------|-----------------------------------------------------|--------------------------------------------------------------------------|-------------------------------------------------|--------------------------------------------|
| Strong recommendation against the intervention | Conditional recommendation against the intervention | Conditional recommendation for either the intervention or the comparison | Conditional recommendation for the intervention | Strong recommendation for the intervention |
| ○                                              | ○                                                   | ○                                                                        | ☑                                               | ○                                          |

© ESC/ERS 2022

**CONCLUSIONS**

|                                                                                                                                                                                                                                                                                 |
|---------------------------------------------------------------------------------------------------------------------------------------------------------------------------------------------------------------------------------------------------------------------------------|
| <b>Recommendations</b>                                                                                                                                                                                                                                                          |
| In patients with CTEPH who are candidates for BPA, medical therapy should be considered prior to the intervention (conditional recommendation for the intervention, very low quality of evidence).                                                                              |
| <b>Justification</b>                                                                                                                                                                                                                                                            |
| The included evidence suggested that pre-treatment improves pulmonary haemodynamics and safety of the procedure. This was confirmed by the clinical experience of the Task Force members. However, due to the low certainty of the evidence, the recommendation is conditional. |
| <b>Subgroup considerations</b>                                                                                                                                                                                                                                                  |
|                                                                                                                                                                                                                                                                                 |
| <b>Implementation considerations</b>                                                                                                                                                                                                                                            |
|                                                                                                                                                                                                                                                                                 |
| <b>Monitoring and evaluation</b>                                                                                                                                                                                                                                                |
|                                                                                                                                                                                                                                                                                 |
| <b>Research priorities</b>                                                                                                                                                                                                                                                      |
| More RCTs are needed to re-assess haemodynamics and long-term outcomes on bigger populations.                                                                                                                                                                                   |

© ESC/ERS 2022

**16.5. Evidence to Decision for key narrative question 2**

**Table S13 Evidence to Decision for key narrative question 2**

**QUESTION 2 (NARRATIVE)**

|                                                                                                                                                                      |                                                                                                     |
|----------------------------------------------------------------------------------------------------------------------------------------------------------------------|-----------------------------------------------------------------------------------------------------|
| <b>Should new echocardiographic probability of pulmonary hypertension approaches be proposed in symptomatic patients with a suspicion of pulmonary hypertension?</b> |                                                                                                     |
| <b>Population</b>                                                                                                                                                    | Suspected PH.                                                                                       |
| <b>Intervention</b>                                                                                                                                                  | Echocardiography testing.                                                                           |
| <b>Purpose of the test</b>                                                                                                                                           | To improve accuracy of the diagnostic algorithm for PH.                                             |
| <b>Role of the test</b>                                                                                                                                              | To establish the echocardiographic probability of PH based on TR velocity and indirect signs of PH. |
| <b>Linked treatments</b>                                                                                                                                             | NA                                                                                                  |
| <b>Anticipated outcomes</b>                                                                                                                                          | NA                                                                                                  |
| <b>Setting</b>                                                                                                                                                       | NA                                                                                                  |
| <b>Perspective</b>                                                                                                                                                   | NA                                                                                                  |
| <b>Background</b>                                                                                                                                                    | NA                                                                                                  |
| <b>Subgroups</b>                                                                                                                                                     | NA                                                                                                  |
| <b>Conflict of interests</b>                                                                                                                                         | None                                                                                                |

© ESC/ERS 2022

**ASSESSMENT**

| <b>Problem</b>                                                                                                                                                                                                                           |                                                                                                                                            |                                                                                                                                      |
|------------------------------------------------------------------------------------------------------------------------------------------------------------------------------------------------------------------------------------------|--------------------------------------------------------------------------------------------------------------------------------------------|--------------------------------------------------------------------------------------------------------------------------------------|
| Is the problem a priority?                                                                                                                                                                                                               |                                                                                                                                            |                                                                                                                                      |
| <b>Judgement</b>                                                                                                                                                                                                                         | <b>Research evidence</b>                                                                                                                   | <b>Additional considerations</b>                                                                                                     |
| <input type="radio"/> No<br><input type="radio"/> Probably no<br><input type="radio"/> Probably yes<br><input checked="" type="radio"/> <b>Yes</b><br><input type="radio"/> Varies<br><input type="radio"/> Don't know                   | It is a priority, as the haemodynamic definition of PH has changed.                                                                        | NA                                                                                                                                   |
| <b>Test accuracy</b>                                                                                                                                                                                                                     |                                                                                                                                            |                                                                                                                                      |
| How accurate is the test?                                                                                                                                                                                                                |                                                                                                                                            |                                                                                                                                      |
| <b>Judgement</b>                                                                                                                                                                                                                         | <b>Research evidence</b>                                                                                                                   | <b>Additional considerations</b>                                                                                                     |
| <input type="radio"/> Very inaccurate<br><input type="radio"/> Inaccurate<br><input checked="" type="radio"/> <b>Accurate</b><br><input type="radio"/> Very accurate<br><input type="radio"/> Varies<br><input type="radio"/> Don't know | Echocardiographic criteria for PH probability have high sensitivity and good specificity.                                                  | NA                                                                                                                                   |
| <b>Desirable effects</b>                                                                                                                                                                                                                 |                                                                                                                                            |                                                                                                                                      |
| How substantial are the desirable anticipated effects?                                                                                                                                                                                   |                                                                                                                                            |                                                                                                                                      |
| <b>Judgement</b>                                                                                                                                                                                                                         | <b>Research evidence</b>                                                                                                                   | <b>Additional considerations</b>                                                                                                     |
| <input checked="" type="radio"/> <b>Trivial</b><br><input type="radio"/> Small<br><input type="radio"/> Moderate<br><input type="radio"/> Large<br><input type="radio"/> Varies<br><input type="radio"/> Don't know                      | The introduction of a new haemodynamic definition of PH would not change the sensitivity of the echocardiographic PH probability criteria. | NA                                                                                                                                   |
| <b>Undesirable effects</b>                                                                                                                                                                                                               |                                                                                                                                            |                                                                                                                                      |
| How substantial are the undesirable anticipated effects?                                                                                                                                                                                 |                                                                                                                                            |                                                                                                                                      |
| <b>Judgement</b>                                                                                                                                                                                                                         | <b>Research evidence</b>                                                                                                                   | <b>Additional considerations</b>                                                                                                     |
| <input type="radio"/> Large<br><input checked="" type="radio"/> <b>Moderate</b><br><input type="radio"/> Small<br><input type="radio"/> Trivial<br><input type="radio"/> Varies<br><input type="radio"/> Don't know                      | The introduction of a new haemodynamic definition of PH would reduce the specificity of the echocardiographic PH probability criteria.     | NA                                                                                                                                   |
| <b>Certainty of the evidence of test accuracy</b>                                                                                                                                                                                        |                                                                                                                                            |                                                                                                                                      |
| What is the overall certainty of the evidence of test accuracy?                                                                                                                                                                          |                                                                                                                                            |                                                                                                                                      |
| <b>Judgement</b>                                                                                                                                                                                                                         | <b>Research evidence</b>                                                                                                                   | <b>Additional considerations</b>                                                                                                     |
| <input type="radio"/> Very low<br><input type="radio"/> Low<br><input checked="" type="radio"/> <b>Moderate</b><br><input type="radio"/> High<br><input type="radio"/> No included studies                                               | The certainty of the evidence of test accuracy is moderate based on the four included studies.                                             | Adding new echocardiographic indices among the indirect signs of PH will enable increased specificity, maintaining high sensitivity. |

Continued

**Certainty of the evidence of test effects**

What is the overall certainty of the evidence for any critical or important direct benefits, adverse effects, or burden of the test?

| Judgement                                                                                                                                                                                     | Research evidence                                                                                                                                                             | Additional considerations |
|-----------------------------------------------------------------------------------------------------------------------------------------------------------------------------------------------|-------------------------------------------------------------------------------------------------------------------------------------------------------------------------------|---------------------------|
| <input type="radio"/> Very low<br><input type="radio"/> Low<br><input checked="" type="checkbox"/> <b>Moderate</b><br><input type="radio"/> High<br><input type="radio"/> No included studies | The burden of the evidence for direct benefits of the test is moderate. No potential adverse effects can be considered, as echocardiography is an easy and non-invasive test. | NA                        |

**Certainty of the evidence of management effects**

What is the overall certainty of the evidence of effects of management effects that is guided by the test results?

| Judgement                                                                                                                                                                                     | Research evidence                                                                                                                                                         | Additional considerations |
|-----------------------------------------------------------------------------------------------------------------------------------------------------------------------------------------------|---------------------------------------------------------------------------------------------------------------------------------------------------------------------------|---------------------------|
| <input type="radio"/> Very low<br><input type="radio"/> Low<br><input checked="" type="checkbox"/> <b>Moderate</b><br><input type="radio"/> High<br><input type="radio"/> No included studies | Increasing the specificity and positive predictive value of the test (echocardiographic probability of PH) is crucial to avoid unnecessary RHC in individuals without PH. | NA                        |

**Certainty of the evidence of test result/management**

How certain is the link between test results and management decisions?

| Judgement                                                                                                                                                                                     | Research evidence                                                                                                                                                         | Additional considerations |
|-----------------------------------------------------------------------------------------------------------------------------------------------------------------------------------------------|---------------------------------------------------------------------------------------------------------------------------------------------------------------------------|---------------------------|
| <input type="radio"/> Very low<br><input type="radio"/> Low<br><input checked="" type="checkbox"/> <b>Moderate</b><br><input type="radio"/> High<br><input type="radio"/> No included studies | Increasing the specificity and positive predictive value of the test (echocardiographic probability of PH) is crucial to avoid unnecessary RHC in individuals without PH. | NA                        |

**Certainty of effects**

What is the overall certainty of the evidence of effects of the test?

| Judgement                                                                                                                                                                                     | Research evidence                                                                                 | Additional considerations |
|-----------------------------------------------------------------------------------------------------------------------------------------------------------------------------------------------|---------------------------------------------------------------------------------------------------|---------------------------|
| <input type="radio"/> Very low<br><input type="radio"/> Low<br><input checked="" type="checkbox"/> <b>Moderate</b><br><input type="radio"/> High<br><input type="radio"/> No included studies | The new echocardiographic indirect signs of PH have been investigated in two monocentric studies. | NA                        |

**Values**

Is there important uncertainty about or variability in how much people value the main outcomes?

| Judgement                                                                                                                                                                                                                                                                                         | Research evidence | Additional considerations |
|---------------------------------------------------------------------------------------------------------------------------------------------------------------------------------------------------------------------------------------------------------------------------------------------------|-------------------|---------------------------|
| <input type="radio"/> Important uncertainty or variability<br><input type="radio"/> Possibly important uncertainty or variability<br><input checked="" type="checkbox"/> <b>Probably no important uncertainty or variability</b><br><input type="radio"/> No important uncertainty or variability | Not applicable.   | NA                        |

*Continued*

| <b>Balance of effects</b>                                                                                                                                                                                                                                                                                                                                                                               |                                                                                                                                            |                                                                                                                                         |
|---------------------------------------------------------------------------------------------------------------------------------------------------------------------------------------------------------------------------------------------------------------------------------------------------------------------------------------------------------------------------------------------------------|--------------------------------------------------------------------------------------------------------------------------------------------|-----------------------------------------------------------------------------------------------------------------------------------------|
| Does the balance between desirable and undesirable effects favour the intervention or the comparison?                                                                                                                                                                                                                                                                                                   |                                                                                                                                            |                                                                                                                                         |
| <b>Judgement</b>                                                                                                                                                                                                                                                                                                                                                                                        | <b>Research evidence</b>                                                                                                                   | <b>Additional considerations</b>                                                                                                        |
| <input type="radio"/> Favours the comparison<br><input type="radio"/> Probably favours the comparison<br><input type="radio"/> Does not favour either the intervention or the comparison<br><input type="radio"/> Probably favours the intervention<br><input checked="" type="checkbox"/> <b>Favours the intervention</b><br><input type="radio"/> Varies<br><input type="radio"/> Don't know          | Including new echocardiographic indices of indirect signs of PH increases specificity without reducing sensitivity of the test.            | As the echocardiographic evaluation is non-invasive, the assessment of new indices should be offered to all patients with suspected PH. |
| <b>Resources required</b>                                                                                                                                                                                                                                                                                                                                                                               |                                                                                                                                            |                                                                                                                                         |
| How large are the resource requirements (costs)?                                                                                                                                                                                                                                                                                                                                                        |                                                                                                                                            |                                                                                                                                         |
| <b>Judgement</b>                                                                                                                                                                                                                                                                                                                                                                                        | <b>Research evidence</b>                                                                                                                   | <b>Additional considerations</b>                                                                                                        |
| <input type="radio"/> Large costs<br><input type="radio"/> Moderate costs<br><input type="radio"/> Negligible costs and savings<br><input type="radio"/> Moderate savings<br><input checked="" type="checkbox"/> <b>Large savings</b><br><input type="radio"/> Varies<br><input type="radio"/> Don't know                                                                                               | There are no additional costs, as the new indices are measured during the echocardiographic evaluation already scheduled for suspected PH. | NA                                                                                                                                      |
| <b>Certainty of evidence of required resources</b>                                                                                                                                                                                                                                                                                                                                                      |                                                                                                                                            |                                                                                                                                         |
| What is the certainty of the evidence of resource requirements (costs)?                                                                                                                                                                                                                                                                                                                                 |                                                                                                                                            |                                                                                                                                         |
| <b>Judgement</b>                                                                                                                                                                                                                                                                                                                                                                                        | <b>Research evidence</b>                                                                                                                   | <b>Additional considerations</b>                                                                                                        |
| <input type="radio"/> Very low<br><input type="radio"/> Low<br><input type="radio"/> Moderate<br><input type="radio"/> High<br><input checked="" type="checkbox"/> <b>No included studies</b>                                                                                                                                                                                                           | Not reviewed as part of this question.                                                                                                     | NA                                                                                                                                      |
| <b>Cost-effectiveness</b>                                                                                                                                                                                                                                                                                                                                                                               |                                                                                                                                            |                                                                                                                                         |
| Does the cost-effectiveness of the intervention favour the intervention or the comparison?                                                                                                                                                                                                                                                                                                              |                                                                                                                                            |                                                                                                                                         |
| <b>Judgement</b>                                                                                                                                                                                                                                                                                                                                                                                        | <b>Research evidence</b>                                                                                                                   | <b>Additional considerations</b>                                                                                                        |
| <input type="radio"/> Favours the comparison<br><input type="radio"/> Probably favours the comparison<br><input type="radio"/> Does not favour either the intervention or the comparison<br><input type="radio"/> Probably favours the intervention<br><input checked="" type="checkbox"/> <b>Favours the intervention</b><br><input type="radio"/> Varies<br><input type="radio"/> No included studies | Not reviewed as part of this question.                                                                                                     | The introduction of new echocardiographic indices will increase specificity, maintaining high sensitivity, without increased costs.     |
| <b>Equity</b>                                                                                                                                                                                                                                                                                                                                                                                           |                                                                                                                                            |                                                                                                                                         |
| What would be the impact on health equity?                                                                                                                                                                                                                                                                                                                                                              |                                                                                                                                            |                                                                                                                                         |
| <b>Judgement</b>                                                                                                                                                                                                                                                                                                                                                                                        | <b>Research evidence</b>                                                                                                                   | <b>Additional considerations</b>                                                                                                        |
| <input type="radio"/> Reduced<br><input type="radio"/> Probably reduced<br><input type="radio"/> Probably no impact<br><input checked="" type="checkbox"/> <b>Probably increased</b><br><input type="radio"/> Increased<br><input type="radio"/> Varies<br><input type="radio"/> Don't know                                                                                                             | Not reviewed as part of this question.                                                                                                     | Unequal access to echocardiographic testing should not occur, as the test is widely available among centres.                            |

Continued

| <b>Acceptability</b>                                                                                                                                                                                                      |                                        |                                                                                                                                                               |
|---------------------------------------------------------------------------------------------------------------------------------------------------------------------------------------------------------------------------|----------------------------------------|---------------------------------------------------------------------------------------------------------------------------------------------------------------|
| Is the intervention acceptable to key stakeholders?                                                                                                                                                                       |                                        |                                                                                                                                                               |
| Judgement                                                                                                                                                                                                                 | Research evidence                      | Additional considerations                                                                                                                                     |
| <input type="radio"/> No<br><input type="radio"/> Probably no<br><input type="radio"/> Probably yes<br><input checked="" type="checkbox"/> <b>Yes</b><br><input type="radio"/> Varies<br><input type="radio"/> Don't know | Not reviewed as part of this question. | The echocardiographic testing is non-invasive and the addition of new simple indices is not time-consuming and may be considered acceptable by practitioners. |

  

| <b>Feasibility</b>                                                                                                                                                                                                        |                                                                                                                                                                              |                           |
|---------------------------------------------------------------------------------------------------------------------------------------------------------------------------------------------------------------------------|------------------------------------------------------------------------------------------------------------------------------------------------------------------------------|---------------------------|
| Is the intervention feasible to implement?                                                                                                                                                                                |                                                                                                                                                                              |                           |
| Judgement                                                                                                                                                                                                                 | Research evidence                                                                                                                                                            | Additional considerations |
| <input type="radio"/> No<br><input type="radio"/> Probably no<br><input type="radio"/> Probably yes<br><input checked="" type="checkbox"/> <b>Yes</b><br><input type="radio"/> Varies<br><input type="radio"/> Don't know | The new indices are collected during routine echocardiographic evaluation of the probability of PH and are easy to measure, without significant prolongation of the testing. | NA                        |

© ESC/ERS 2022

**SUMMARY OF JUDGEMENTS**

|                                                            | <b>Judgement</b>                     |                                               |                                                           |                                         |                                 |        |                     |
|------------------------------------------------------------|--------------------------------------|-----------------------------------------------|-----------------------------------------------------------|-----------------------------------------|---------------------------------|--------|---------------------|
| <b>Problem</b>                                             | No                                   | Probably no                                   | Probably yes                                              | <b>Yes</b>                              | NA                              | Varies | Don't know          |
| <b>Test accuracy</b>                                       | Very inaccurate                      | Inaccurate                                    | <b>Accurate</b>                                           | Very accurate                           | NA                              | Varies | Don't know          |
| <b>Desirable effects</b>                                   | <b>Trivial</b>                       | Small                                         | Moderate                                                  | Large                                   | NA                              | Varies | Don't know          |
| <b>Undesirable effects</b>                                 | Large                                | <b>Moderate</b>                               | Small                                                     | Trivial                                 | NA                              | Varies | Don't know          |
| <b>Certainty of the evidence of test accuracy</b>          | Very low                             | Low                                           | <b>Moderate</b>                                           | High                                    | NA                              | NA     | No included studies |
| <b>Certainty of the evidence of test effects</b>           | Very low                             | Low                                           | <b>Moderate</b>                                           | High                                    | NA                              | NA     | No included studies |
| <b>Certainty of the evidence of management effects</b>     | Very low                             | Low                                           | <b>Moderate</b>                                           | High                                    | NA                              | NA     | No included studies |
| <b>Certainty of the evidence of test result/management</b> | Very low                             | Low                                           | <b>Moderate</b>                                           | High                                    | NA                              | NA     | No included studies |
| <b>Certainty of effects</b>                                | Very low                             | Low                                           | <b>Moderate</b>                                           | High                                    | NA                              | NA     | No included studies |
| <b>Values</b>                                              | Important uncertainty or variability | Possibly important uncertainty or variability | <b>Probably no important uncertainty or variability</b>   | No important uncertainty or variability | NA                              | NA     | NA                  |
| <b>Balance of effects</b>                                  | Favours the comparison               | Probably favours the comparison               | Does not favour either the intervention or the comparison | Probably favours the intervention       | <b>Favours the intervention</b> | Varies | Don't know          |

Continued

|                                                    |                        |                                 |                                                           |                                   |                                 |        |                            |
|----------------------------------------------------|------------------------|---------------------------------|-----------------------------------------------------------|-----------------------------------|---------------------------------|--------|----------------------------|
| <b>Resources required</b>                          | Large costs            | Moderate costs                  | Negligible costs and savings                              | Moderate savings                  | <b>Large savings</b>            | Varies | Don't know                 |
| <b>Certainty of evidence of required resources</b> | Very low               | Low                             | Moderate                                                  | High                              | NA                              | NA     | <b>No included studies</b> |
| <b>Cost-effectiveness</b>                          | Favours the comparison | Probably favours the comparison | Does not favour either the intervention or the comparison | Probably favours the intervention | <b>Favours the intervention</b> | Varies | No included studies        |
| <b>Equity</b>                                      | Reduced                | Probably reduced                | Probably no impact                                        | <b>Probably increased</b>         | Increased                       | Varies | Don't know                 |
| <b>Acceptability</b>                               | No                     | Probably no                     | Probably yes                                              | <b>Yes</b>                        | NA                              | Varies | Don't know                 |
| <b>Feasibility</b>                                 | No                     | Probably no                     | Probably yes                                              | <b>Yes</b>                        | NA                              | Varies | Don't know                 |

© ESC/ERS 2022

## TYPE OF RECOMMENDATION

|                                                |                                                     |                                                                          |                                                 |                                            |
|------------------------------------------------|-----------------------------------------------------|--------------------------------------------------------------------------|-------------------------------------------------|--------------------------------------------|
| Strong recommendation against the intervention | Conditional recommendation against the intervention | Conditional recommendation for either the intervention or the comparison | Conditional recommendation for the intervention | Strong recommendation for the intervention |
| <input type="radio"/>                          | <input type="radio"/>                               | <input type="radio"/>                                                    | <input checked="" type="checkbox"/>             | <input type="radio"/>                      |

© ESC/ERS 2022

## CONCLUSIONS

### Recommendation

It is recommended not to change the TR velocity cut-off values for estimating the echocardiographic probability of PH. It is recommended to use the echocardiographic probability of PH in the diagnostic algorithm, including the new set of parameters among the indirect signs of PH to improve overall accuracy. Cardiopulmonary exercise testing may also be considered in particular settings to further improve accuracy.

### Justification

The new haemodynamic definition of PH would not reduce sensitivity and negative predictive value of the current TR velocity cut-off values for estimating the echocardiographic probability of PH, while the application of new echocardiographic indices of indirect signs would increase the specificity and positive predictive value.

### Subgroup considerations

Symptomatic patients with risk factors or associated conditions for PAH and intermediate echocardiographic probability of PH should be considered for further investigation with cardiopulmonary exercise testing, in order to improve the accuracy of the diagnostic algorithm in keeping with the new definition of PH, especially for scleroderma patients.

### Implementation considerations

Echocardiographic testing is non-invasive and the addition of new simple indices is not time-consuming and may be considered acceptable by practitioners. Unequal access to echocardiographic testing should not occur, as the test is widely available among centres.

### Monitoring and evaluation

NA

### Research priorities

Further studies are needed to find new echocardiographic indices of indirect signs of PH, to increase the overall accuracy of the test. Further studies are needed to increase the evidence in favour of the application of the CPET, to increase the accuracy of the echocardiographic probability of PH.

© ESC/ERS 2022

## 16.6. Evidence to Decision for key narrative question 3

**Table S14** Evidence to Decision for key narrative question 3

### QUESTION 3 (NARRATIVE)

| Should screening be offered to guide detection of pulmonary arterial hypertension in systemic sclerosis? |                                                                                                                                                                                                                                                                                                                                                                                                                                                                                                                                                                                                                                                                 |
|----------------------------------------------------------------------------------------------------------|-----------------------------------------------------------------------------------------------------------------------------------------------------------------------------------------------------------------------------------------------------------------------------------------------------------------------------------------------------------------------------------------------------------------------------------------------------------------------------------------------------------------------------------------------------------------------------------------------------------------------------------------------------------------|
| <b>Population</b>                                                                                        | Patients with a diagnosis of systemic sclerosis (SSc).                                                                                                                                                                                                                                                                                                                                                                                                                                                                                                                                                                                                          |
| <b>Intervention</b>                                                                                      | Systematic application of a test or tests to guide detection of pulmonary arterial hypertension (PAH).                                                                                                                                                                                                                                                                                                                                                                                                                                                                                                                                                          |
| <b>Purpose of the test</b>                                                                               | To diagnose PAH in at-risk asymptomatic individuals or individuals who would not otherwise have sought medical attention on account of their symptoms.                                                                                                                                                                                                                                                                                                                                                                                                                                                                                                          |
| <b>Role of the test</b>                                                                                  | To identify patients at risk of PAH for RHC (gold standard test to confirm or refute a diagnosis of PAH).                                                                                                                                                                                                                                                                                                                                                                                                                                                                                                                                                       |
| <b>Linked treatments</b>                                                                                 | Drug therapies for PAH.                                                                                                                                                                                                                                                                                                                                                                                                                                                                                                                                                                                                                                         |
| <b>Anticipated outcomes</b>                                                                              | Detection of less severe (haemodynamic) disease compared with patients not screened for PAH.<br>Improved outcomes in patients with PAH who receive treatment at an earlier stage.                                                                                                                                                                                                                                                                                                                                                                                                                                                                               |
| <b>Setting</b>                                                                                           | Deployment of screening programme in health care professionals managing patients with SSc; primarily rheumatologists in the secondary care setting.                                                                                                                                                                                                                                                                                                                                                                                                                                                                                                             |
| <b>Perspective</b>                                                                                       | Healthcare professionals with patient involvement.                                                                                                                                                                                                                                                                                                                                                                                                                                                                                                                                                                                                              |
| <b>Background</b>                                                                                        | In SSc, prevalence of PAH is high (5–19%) and the leading cause of death is due to SSc-related organ involvement. Prior to the advent of PAH therapies, patients presented with advanced and severe disease, and prognosis was very poor. Therapies for PAH prevent clinical worsening and improve survival. Patients with less severe disease at diagnosis have improved outcomes compared with those with more severe disease. Earlier treatment would be expected to improve outcomes. The high prevalence of PAH in SSc supports screening of asymptomatic patients and early detection of PAH in those who would not otherwise have sought medical advice. |
| <b>Subgroups</b>                                                                                         | No specific subgroup analysis. Patients with diffuse and limited disease analysed as a single group.                                                                                                                                                                                                                                                                                                                                                                                                                                                                                                                                                            |
| <b>Conflict of interests</b>                                                                             | See ESC declaration of interest.                                                                                                                                                                                                                                                                                                                                                                                                                                                                                                                                                                                                                                |

© ESC/ERS 2022

### ASSESSMENT

| Problem                                                                                                                                                                                                                   |                                                                                                                                                                                                                                                                                                                                                                                                                                                                                                                                                                                                                                                                                                                                                                                                                                                                                                                                                                                                                                                                                                                                                                           |                           |
|---------------------------------------------------------------------------------------------------------------------------------------------------------------------------------------------------------------------------|---------------------------------------------------------------------------------------------------------------------------------------------------------------------------------------------------------------------------------------------------------------------------------------------------------------------------------------------------------------------------------------------------------------------------------------------------------------------------------------------------------------------------------------------------------------------------------------------------------------------------------------------------------------------------------------------------------------------------------------------------------------------------------------------------------------------------------------------------------------------------------------------------------------------------------------------------------------------------------------------------------------------------------------------------------------------------------------------------------------------------------------------------------------------------|---------------------------|
| Is the problem a priority?                                                                                                                                                                                                |                                                                                                                                                                                                                                                                                                                                                                                                                                                                                                                                                                                                                                                                                                                                                                                                                                                                                                                                                                                                                                                                                                                                                                           |                           |
| Judgement                                                                                                                                                                                                                 | Research evidence                                                                                                                                                                                                                                                                                                                                                                                                                                                                                                                                                                                                                                                                                                                                                                                                                                                                                                                                                                                                                                                                                                                                                         | Additional considerations |
| <input type="radio"/> No<br><input type="radio"/> Probably no<br><input type="radio"/> Probably yes<br><input checked="" type="checkbox"/> <b>Yes</b><br><input type="radio"/> Varies<br><input type="radio"/> Don't know | <p>PAH is a leading cause of death related to SSc organ involvement. Prior to PAH therapies, SSc-PAH was associated with a poor prognosis with a 3 year survival of 30%.<sup>227</sup> Mortality remains high despite PAH-specific therapy; a meta-analysis reported 1 and 3 year survival rates of 81% and 52%, respectively.<sup>228</sup> Evidence for the practicality of screening to detect less severe haemodynamic disease in SSc was provided by an early detection screening programme in France that combined echocardiography and symptomatic assessment to determine the need for RHC.<sup>229</sup> Compared with a contemporary non-screened cohort they had less severe haemodynamic disease and 1 and 5 year survival of 100% and 73% compared with 75% and 25%, respectively.<sup>230</sup> Limitations included small numbers and lead time, and length-time bias; however, this provides a strong rationale for screening for PAH in SSc. The high prevalence of PAH in SSc and the impact on survival makes screening for PAH in SSc attractive; however, there is concern regarding the limitations of available screening tools.<sup>231</sup></p> | NA                        |
| Test accuracy                                                                                                                                                                                                             |                                                                                                                                                                                                                                                                                                                                                                                                                                                                                                                                                                                                                                                                                                                                                                                                                                                                                                                                                                                                                                                                                                                                                                           |                           |
| How accurate is the test?                                                                                                                                                                                                 |                                                                                                                                                                                                                                                                                                                                                                                                                                                                                                                                                                                                                                                                                                                                                                                                                                                                                                                                                                                                                                                                                                                                                                           |                           |
| Judgement                                                                                                                                                                                                                 | Research evidence                                                                                                                                                                                                                                                                                                                                                                                                                                                                                                                                                                                                                                                                                                                                                                                                                                                                                                                                                                                                                                                                                                                                                         | Additional considerations |
| <input type="radio"/> Very inaccurate<br><input type="radio"/> Inaccurate<br><input type="radio"/> Accurate<br><input type="radio"/> Very accurate                                                                        | <p>A number of tests can be used to screen for PAH. Early screening recommendations for SSc were based on echocardiography alone; however, up to 29% of patients with PAH may be missed using this approach.<sup>232</sup> A number of screening algorithms using a combination of clinical features, echocardiography, lung function, and NT-proBNP to select patients for RHC have been studied. The DETECT study is the only study to perform RHC (the gold standard test for a diagnosis of PAH) in all</p>                                                                                                                                                                                                                                                                                                                                                                                                                                                                                                                                                                                                                                                           | NA                        |

Continued

|                                                                                                                                                                                                                                       |                                                                                                                                                                                                                                                                                                                                                                                                                                                                                                                                                                                                                                                                                                                                                                                                                                                                                                                                                                                                                                                                                                                                                                                                                                                                                                                                                                                                                                                                                                                                                                                                                                                                                                                                                                                                                                                                          |                                  |
|---------------------------------------------------------------------------------------------------------------------------------------------------------------------------------------------------------------------------------------|--------------------------------------------------------------------------------------------------------------------------------------------------------------------------------------------------------------------------------------------------------------------------------------------------------------------------------------------------------------------------------------------------------------------------------------------------------------------------------------------------------------------------------------------------------------------------------------------------------------------------------------------------------------------------------------------------------------------------------------------------------------------------------------------------------------------------------------------------------------------------------------------------------------------------------------------------------------------------------------------------------------------------------------------------------------------------------------------------------------------------------------------------------------------------------------------------------------------------------------------------------------------------------------------------------------------------------------------------------------------------------------------------------------------------------------------------------------------------------------------------------------------------------------------------------------------------------------------------------------------------------------------------------------------------------------------------------------------------------------------------------------------------------------------------------------------------------------------------------------------------|----------------------------------|
| <input checked="" type="checkbox"/> <b>Varies</b><br><input type="checkbox"/> Don't know                                                                                                                                              | <p>patients with SSc who were screened for PAH, allowing calculation of a true false negative rate. The DETECT algorithm proposes a two-step approach. In step one, six variables, presence or absence of telangiectasia, forced vital capacity (FVC)/DLCO%, right axis deviation on ECG, anti-centromere antibody status, serum urate, and NT-proBNP are used to decide the need for echocardiography or proceeding straight to RHC. In step two, the step one prediction score and two echocardiographic variables determine referral to RHC.<sup>232</sup> In this enriched cohort of patients (disease duration &gt;3 years with other and DLCO &lt; 60%), 4% of patients with PAH were missed compared with 29% using echocardiography alone. Using the DETECT algorithm, overall sensitivity was high at 96%, although specificity was significantly lower at 48% and in the population studied PPV 35% and NPV 98%. The downside to the high sensitivity of the algorithm is the high RHC referral rate.</p> <p>Other screening approaches can also be used for PAH. The Australian Scleroderma Interest Group (ASIG) has used an algorithm based on lung function (DLCO &lt; 70% and FVC/DLCO <math>\geq</math>1.8) and/or NT-proBNP &gt; 210 pg/mL to select patients for further testing, including RHC and reported sensitivity, specificity, positive and negative predictive values of 94.1%, 54.5%, 61.5%, and 92.3%, respectively.<sup>233</sup> This combined approach improved diagnostic accuracy compared with use of NT-proBNP or lung function alone.</p> <p>Comparisons between screening approaches have also been performed. A recent study found similar performance for DETECT and ASIG but a higher RHC rate for DETECT,<sup>234</sup> however, caution should be used when interpreting these results due to methodological limitations.</p> |                                  |
| <b>Desirable effects</b><br>How substantial are the desirable anticipated effects?                                                                                                                                                    |                                                                                                                                                                                                                                                                                                                                                                                                                                                                                                                                                                                                                                                                                                                                                                                                                                                                                                                                                                                                                                                                                                                                                                                                                                                                                                                                                                                                                                                                                                                                                                                                                                                                                                                                                                                                                                                                          |                                  |
| <b>Judgement</b>                                                                                                                                                                                                                      | <b>Research evidence</b>                                                                                                                                                                                                                                                                                                                                                                                                                                                                                                                                                                                                                                                                                                                                                                                                                                                                                                                                                                                                                                                                                                                                                                                                                                                                                                                                                                                                                                                                                                                                                                                                                                                                                                                                                                                                                                                 | <b>Additional considerations</b> |
| <input type="checkbox"/> Trivial<br><input type="checkbox"/> Small<br><input type="checkbox"/> Moderate<br><input checked="" type="checkbox"/> <b>Large</b><br><input type="checkbox"/> Varies<br><input type="checkbox"/> Don't know | <p>Compared with a contemporary non-screened cohort, an early detection programme in France demonstrated that patients detected following screening had less severe haemodynamic disease<sup>229</sup> than non-screened patients and 1 and 5 year survival of 100% and 73% compared with 75% and 25%, respectively, in a contemporaneous non-screened cohort.<sup>230</sup></p> <p>The DETECT programme confirmed that screening asymptomatic patients was also capable of identifying patients with mild elevation of mPAP 21–24 mmHg.<sup>232</sup></p>                                                                                                                                                                                                                                                                                                                                                                                                                                                                                                                                                                                                                                                                                                                                                                                                                                                                                                                                                                                                                                                                                                                                                                                                                                                                                                               | NA                               |
| <b>Undesirable effects</b><br>How substantial are the undesirable anticipated effects?                                                                                                                                                |                                                                                                                                                                                                                                                                                                                                                                                                                                                                                                                                                                                                                                                                                                                                                                                                                                                                                                                                                                                                                                                                                                                                                                                                                                                                                                                                                                                                                                                                                                                                                                                                                                                                                                                                                                                                                                                                          |                                  |
| <b>Judgement</b>                                                                                                                                                                                                                      | <b>Research evidence</b>                                                                                                                                                                                                                                                                                                                                                                                                                                                                                                                                                                                                                                                                                                                                                                                                                                                                                                                                                                                                                                                                                                                                                                                                                                                                                                                                                                                                                                                                                                                                                                                                                                                                                                                                                                                                                                                 | <b>Additional considerations</b> |
| <input type="checkbox"/> Large<br><input type="checkbox"/> Moderate<br><input checked="" type="checkbox"/> <b>Small</b><br><input type="checkbox"/> Trivial<br><input type="checkbox"/> Varies<br><input type="checkbox"/> Don't know | <p>Screening has emotional and financial impacts, although data for screening for PAH in SSc are very limited. Annual screening for PAH in SSc is currently recommended in asymptomatic patients. The cost is dependent on the approach to screening. There are limited data comparing the cost of screening regimens. A study by Vandecasteele <i>et al.</i><sup>235</sup> compared DETECT vs. three alternative screening approaches and noted that DETECT was the most expensive. The costings, however, appeared very conservative. The cost was EUR224/80/90/112 per patient using the DETECT algorithm/2009 ESC/ERS Guidelines/2015 echo screening/2015 combined screening. Given that patients with SSc frequently develop PAH after many years, a significant number of patients would be expected to be screened &gt;10 times during their lifetime. With significant financial cost, RHC is an invasive test with an albeit relatively low morbidity and mortality, and has significant associated costs. Reducing the number of RHCs recommended using a screening programme would be highly desirable. The DETECT approach recommends RHC in a larger number of patients than other approaches.</p>                                                                                                                                                                                                                                                                                                                                                                                                                                                                                                                                                                                                                                                          | NA                               |
| <b>Certainty of the evidence of test accuracy</b><br>What is the overall certainty of the evidence of test accuracy?                                                                                                                  |                                                                                                                                                                                                                                                                                                                                                                                                                                                                                                                                                                                                                                                                                                                                                                                                                                                                                                                                                                                                                                                                                                                                                                                                                                                                                                                                                                                                                                                                                                                                                                                                                                                                                                                                                                                                                                                                          |                                  |
| <b>Judgement</b>                                                                                                                                                                                                                      | <b>Research evidence</b>                                                                                                                                                                                                                                                                                                                                                                                                                                                                                                                                                                                                                                                                                                                                                                                                                                                                                                                                                                                                                                                                                                                                                                                                                                                                                                                                                                                                                                                                                                                                                                                                                                                                                                                                                                                                                                                 | <b>Additional considerations</b> |
| <input type="checkbox"/> Very low<br><input type="checkbox"/> Low<br><input type="checkbox"/> Moderate<br><input checked="" type="checkbox"/> <b>High</b><br><input type="checkbox"/> No included studies                             | <p>A single study<sup>232</sup> performed RHC in all patients (DETECT), so for other studies the true false-negative rate cannot be calculated. However, this study provides a high level of evidence for test accuracy. A limitation of this study is that the screened population was enriched for patients at increased risk of PAH. This study provides valuable evidence that echocardiography alone missed a large number of patients with PAH when used to screen asymptomatic patients with SSc. This has resulted in removal of the previous recommendations for yearly echocardiography alone to screen for PAH in SSc.</p>                                                                                                                                                                                                                                                                                                                                                                                                                                                                                                                                                                                                                                                                                                                                                                                                                                                                                                                                                                                                                                                                                                                                                                                                                                    | NA                               |

Continued



| <b>Certainty of the evidence of test effects</b>                                                                                                                                              |                                                                                                                                                                                                                                                                                                                                                                                                                                                                                                                                                                                                                                                                                                                                                                                                                                                                                                                                                                                                                                                                                                                                                                                                                                                                                                                                                                                                                                                                                                                          |                                  |
|-----------------------------------------------------------------------------------------------------------------------------------------------------------------------------------------------|--------------------------------------------------------------------------------------------------------------------------------------------------------------------------------------------------------------------------------------------------------------------------------------------------------------------------------------------------------------------------------------------------------------------------------------------------------------------------------------------------------------------------------------------------------------------------------------------------------------------------------------------------------------------------------------------------------------------------------------------------------------------------------------------------------------------------------------------------------------------------------------------------------------------------------------------------------------------------------------------------------------------------------------------------------------------------------------------------------------------------------------------------------------------------------------------------------------------------------------------------------------------------------------------------------------------------------------------------------------------------------------------------------------------------------------------------------------------------------------------------------------------------|----------------------------------|
| What is the overall certainty of the evidence for any critical or important direct benefits, adverse effects, or burden of the test?                                                          |                                                                                                                                                                                                                                                                                                                                                                                                                                                                                                                                                                                                                                                                                                                                                                                                                                                                                                                                                                                                                                                                                                                                                                                                                                                                                                                                                                                                                                                                                                                          |                                  |
| <b>Judgement</b>                                                                                                                                                                              | <b>Research evidence</b>                                                                                                                                                                                                                                                                                                                                                                                                                                                                                                                                                                                                                                                                                                                                                                                                                                                                                                                                                                                                                                                                                                                                                                                                                                                                                                                                                                                                                                                                                                 | <b>Additional considerations</b> |
| <input type="radio"/> Very low<br><input type="radio"/> Low<br><input checked="" type="checkbox"/> <b>Moderate</b><br><input type="radio"/> High<br><input type="radio"/> No included studies | Available data have demonstrated that patients with SSc-PAH can be diagnosed with less severe haemodynamic disease; however, the comparisons are related to contemporaneous cohorts and there is no study evidence randomizing patients to screening or no screening. <sup>230,232</sup> Given the current strength of evidence, undertaking such studies would be challenging.                                                                                                                                                                                                                                                                                                                                                                                                                                                                                                                                                                                                                                                                                                                                                                                                                                                                                                                                                                                                                                                                                                                                          | NA                               |
| <b>Certainty of the evidence of management effects</b>                                                                                                                                        |                                                                                                                                                                                                                                                                                                                                                                                                                                                                                                                                                                                                                                                                                                                                                                                                                                                                                                                                                                                                                                                                                                                                                                                                                                                                                                                                                                                                                                                                                                                          |                                  |
| What is the overall certainty of the evidence of effects of the management that is guided by the test results?                                                                                |                                                                                                                                                                                                                                                                                                                                                                                                                                                                                                                                                                                                                                                                                                                                                                                                                                                                                                                                                                                                                                                                                                                                                                                                                                                                                                                                                                                                                                                                                                                          |                                  |
| <b>Judgement</b>                                                                                                                                                                              | <b>Research evidence</b>                                                                                                                                                                                                                                                                                                                                                                                                                                                                                                                                                                                                                                                                                                                                                                                                                                                                                                                                                                                                                                                                                                                                                                                                                                                                                                                                                                                                                                                                                                 | <b>Additional considerations</b> |
| <input type="radio"/> Very low<br><input type="radio"/> Low<br><input checked="" type="checkbox"/> <b>Moderate</b><br><input type="radio"/> High<br><input type="radio"/> No included studies | Studies have examined how screening for PAH is implemented in patients with SSc. Despite recommendations to annually screen for SSc, data suggest that adherence to screening is moderate overall, although networks of physicians with an interest in SSc have demonstrably higher adherence to screening regimens. <sup>236</sup><br>A study showed that 35% of patients with SSc had an echocardiogram and 53% had lung function testing in the year prior to PAH diagnosis. <sup>237</sup><br>A study from Australia showed that <60% of patients underwent annual screening and that RHC was not used in all to confirm the diagnosis of PAH. <sup>238</sup><br>A number of approaches to improve deployment and adherence to screening regimens have been implemented and the success of these approaches assessed. In Australia, the ASCS used a web-based data collection and decision support for applying a PAH screening algorithm in patients with SSc. Since its introduction, adherence to annual screening has increased from 56% to 89%. <sup>236</sup> However, 30% of patients deemed to be at moderate or high risk of PAH were referred for RHC, predominantly due to preservation of functional class or following referral to a cardiologist or respiratory physician where RHC was not deemed necessary. Patient refusal for RHC occurred in a minority of 2%.<br>These results highlight that a number of factors exist that limit adherence to current international screening recommendations. | NA                               |
| <b>Certainty of the evidence of test result/management</b>                                                                                                                                    |                                                                                                                                                                                                                                                                                                                                                                                                                                                                                                                                                                                                                                                                                                                                                                                                                                                                                                                                                                                                                                                                                                                                                                                                                                                                                                                                                                                                                                                                                                                          |                                  |
| How certain is the link between test results and management decisions?                                                                                                                        |                                                                                                                                                                                                                                                                                                                                                                                                                                                                                                                                                                                                                                                                                                                                                                                                                                                                                                                                                                                                                                                                                                                                                                                                                                                                                                                                                                                                                                                                                                                          |                                  |
| <b>Judgement</b>                                                                                                                                                                              | <b>Research evidence</b>                                                                                                                                                                                                                                                                                                                                                                                                                                                                                                                                                                                                                                                                                                                                                                                                                                                                                                                                                                                                                                                                                                                                                                                                                                                                                                                                                                                                                                                                                                 | <b>Additional considerations</b> |
| <input type="radio"/> Very low<br><input type="radio"/> Low<br><input checked="" type="checkbox"/> <b>Moderate</b><br><input type="radio"/> High<br><input type="radio"/> No included studies | Data for networks of physicians with an interest in SSc show that, despite recommendations to perform RHC in patients at risk of PAH, a significant number of patients do not undergo the gold standard test (RHC) to confirm or refute the diagnosis of PAH (see section above), with less symptomatic or asymptomatic patients less likely to undergo testing, particularly when there are coexisting comorbidities.<br>Limited data are available on how patients are treated when diagnosed with PAH from screening programmes. Data from Mihai <i>et al.</i> <sup>239</sup> noted that 24/25 patients with progressive PAH received treatment, whereas 28/32 patients with stable PAH received therapy during 3 years of follow-up after being identified as having PAH from a screening programme.                                                                                                                                                                                                                                                                                                                                                                                                                                                                                                                                                                                                                                                                                                                 | NA                               |
| <b>Certainty of effects</b>                                                                                                                                                                   |                                                                                                                                                                                                                                                                                                                                                                                                                                                                                                                                                                                                                                                                                                                                                                                                                                                                                                                                                                                                                                                                                                                                                                                                                                                                                                                                                                                                                                                                                                                          |                                  |
| What is the overall certainty of the evidence of effects of the test?                                                                                                                         |                                                                                                                                                                                                                                                                                                                                                                                                                                                                                                                                                                                                                                                                                                                                                                                                                                                                                                                                                                                                                                                                                                                                                                                                                                                                                                                                                                                                                                                                                                                          |                                  |
| <b>Judgement</b>                                                                                                                                                                              | <b>Research evidence</b>                                                                                                                                                                                                                                                                                                                                                                                                                                                                                                                                                                                                                                                                                                                                                                                                                                                                                                                                                                                                                                                                                                                                                                                                                                                                                                                                                                                                                                                                                                 | <b>Additional considerations</b> |
| <input type="radio"/> Very low<br><input type="radio"/> Low<br><input type="radio"/> Moderate<br><input checked="" type="checkbox"/> <b>High</b><br><input type="radio"/> No included studies | Humbert <i>et al.</i> reported better outcomes in screened patients with SSc compared with those with PAH-SSc who were not identified from screening programmes, although this was not a randomized study but rather a comparison with a contemporary cohort. <sup>230</sup><br>The DETECT study reported on patients observed for 3 years following screening. They presented data on 57 patients with PAH. Patients received therapy for their PAH; despite this, 40% of early diagnosed patients with PAH progressed, with male gender, functional class and pulmonary function tests at                                                                                                                                                                                                                                                                                                                                                                                                                                                                                                                                                                                                                                                                                                                                                                                                                                                                                                                              | NA                               |

Continued

|                                                                                                                                                                                                                                                                                                                                                                                                |                                                                                                                                                                                                                                                                                                                                                                                                                                                                                                                                                                                                                                                                                                                                                                                                                                                                                                                                                                                                                                                                                                                                                                                                                                                                                                                                                                                                                                                                                                                                                                                                                                                                                                |                                                                                                                                                                                                                                                                                                                                                                                                                                                                                                                                                                                                      |
|------------------------------------------------------------------------------------------------------------------------------------------------------------------------------------------------------------------------------------------------------------------------------------------------------------------------------------------------------------------------------------------------|------------------------------------------------------------------------------------------------------------------------------------------------------------------------------------------------------------------------------------------------------------------------------------------------------------------------------------------------------------------------------------------------------------------------------------------------------------------------------------------------------------------------------------------------------------------------------------------------------------------------------------------------------------------------------------------------------------------------------------------------------------------------------------------------------------------------------------------------------------------------------------------------------------------------------------------------------------------------------------------------------------------------------------------------------------------------------------------------------------------------------------------------------------------------------------------------------------------------------------------------------------------------------------------------------------------------------------------------------------------------------------------------------------------------------------------------------------------------------------------------------------------------------------------------------------------------------------------------------------------------------------------------------------------------------------------------|------------------------------------------------------------------------------------------------------------------------------------------------------------------------------------------------------------------------------------------------------------------------------------------------------------------------------------------------------------------------------------------------------------------------------------------------------------------------------------------------------------------------------------------------------------------------------------------------------|
|                                                                                                                                                                                                                                                                                                                                                                                                | <p>diagnosis associated with disease progression.<sup>239</sup></p> <p>These data support that patients diagnosed with PAH from a screening programme have a high rate of clinical worsening, suggesting that the screening test identifies clinically meaningful disease (i.e. the certainty of effect is high).</p> <p>The improved outcomes of patients identified from screening compared with historical or contemporary cohorts would support a positive impact on long-term outcomes, although the impact of lead time bias could not be excluded.</p>                                                                                                                                                                                                                                                                                                                                                                                                                                                                                                                                                                                                                                                                                                                                                                                                                                                                                                                                                                                                                                                                                                                                  |                                                                                                                                                                                                                                                                                                                                                                                                                                                                                                                                                                                                      |
| <b>Values</b>                                                                                                                                                                                                                                                                                                                                                                                  |                                                                                                                                                                                                                                                                                                                                                                                                                                                                                                                                                                                                                                                                                                                                                                                                                                                                                                                                                                                                                                                                                                                                                                                                                                                                                                                                                                                                                                                                                                                                                                                                                                                                                                |                                                                                                                                                                                                                                                                                                                                                                                                                                                                                                                                                                                                      |
| Is there important uncertainty about or variability in how much people value the main outcomes?                                                                                                                                                                                                                                                                                                |                                                                                                                                                                                                                                                                                                                                                                                                                                                                                                                                                                                                                                                                                                                                                                                                                                                                                                                                                                                                                                                                                                                                                                                                                                                                                                                                                                                                                                                                                                                                                                                                                                                                                                |                                                                                                                                                                                                                                                                                                                                                                                                                                                                                                                                                                                                      |
| <b>Judgement</b>                                                                                                                                                                                                                                                                                                                                                                               | <b>Research evidence</b>                                                                                                                                                                                                                                                                                                                                                                                                                                                                                                                                                                                                                                                                                                                                                                                                                                                                                                                                                                                                                                                                                                                                                                                                                                                                                                                                                                                                                                                                                                                                                                                                                                                                       | <b>Additional considerations</b>                                                                                                                                                                                                                                                                                                                                                                                                                                                                                                                                                                     |
| <input type="radio"/> Important uncertainty or variability<br><input type="radio"/> Possibly important uncertainty or variability<br><input checked="" type="checkbox"/> <b>Probably no important uncertainty or variability</b><br><input type="radio"/> No important uncertainty or variability                                                                                              | <p>There is general acceptance that screening for PAH in SSC is appropriate. The uncertainty pertains to the population to be screened and the frequency with which this should be done.</p>                                                                                                                                                                                                                                                                                                                                                                                                                                                                                                                                                                                                                                                                                                                                                                                                                                                                                                                                                                                                                                                                                                                                                                                                                                                                                                                                                                                                                                                                                                   | <p>Screening for PAH in SSC is also endorsed by patient organizations, and the high uptake amongst patients reflects that this approach is generally acceptable. The Scleroderma and Raynaud's UK charity (SRUK) notes 'annual tests are essential to monitor the progression of scleroderma and something you are entitled to as a patient' and 'if any of these tests are not being performed and you feel they should be, tell your doctor...'</p> <p><a href="https://www.sruk.co.uk/scleroderma/annual-tests-scleroderma/">https://www.sruk.co.uk/scleroderma/annual-tests-scleroderma/</a></p> |
| <b>Balance of effects</b>                                                                                                                                                                                                                                                                                                                                                                      |                                                                                                                                                                                                                                                                                                                                                                                                                                                                                                                                                                                                                                                                                                                                                                                                                                                                                                                                                                                                                                                                                                                                                                                                                                                                                                                                                                                                                                                                                                                                                                                                                                                                                                |                                                                                                                                                                                                                                                                                                                                                                                                                                                                                                                                                                                                      |
| Does the balance between desirable and undesirable effects favour the intervention or the comparison?                                                                                                                                                                                                                                                                                          |                                                                                                                                                                                                                                                                                                                                                                                                                                                                                                                                                                                                                                                                                                                                                                                                                                                                                                                                                                                                                                                                                                                                                                                                                                                                                                                                                                                                                                                                                                                                                                                                                                                                                                |                                                                                                                                                                                                                                                                                                                                                                                                                                                                                                                                                                                                      |
| <b>Judgement</b>                                                                                                                                                                                                                                                                                                                                                                               | <b>Research evidence</b>                                                                                                                                                                                                                                                                                                                                                                                                                                                                                                                                                                                                                                                                                                                                                                                                                                                                                                                                                                                                                                                                                                                                                                                                                                                                                                                                                                                                                                                                                                                                                                                                                                                                       | <b>Additional considerations</b>                                                                                                                                                                                                                                                                                                                                                                                                                                                                                                                                                                     |
| <input type="radio"/> Favours the comparison<br><input type="radio"/> Probably favours the comparison<br><input type="radio"/> Does not favour either the intervention or the comparison<br><input type="radio"/> Probably favours the intervention<br><input checked="" type="checkbox"/> <b>Favours the intervention</b><br><input type="radio"/> Varies<br><input type="radio"/> Don't know | <p>Screening using the DETECT algorithm in a cohort of patients with SSC enriched for PAH identified a high proportion of patients with PAH (19%). These patients had haemodynamically modest disease 32.5(8) mmHg and PVR 371(226) dynes. Although patients underwent RHC, complication rates were low, with one patient having a haematoma caused by accidental carotid puncture.<sup>232</sup></p> <p>Given the high rate of subsequent clinical worsening of 40% over 3 years in this cohort,<sup>239</sup> the conclusion is that screening in this population identifies a high proportion of patients with PAH, with modest disease, which is clinically important and undesirable effects were low.</p> <p>Subsequent studies have also demonstrated in other cohorts that DETECT can be deployed to screen for PAH.</p> <p>The evidence strongly favours the intervention (screening).</p>                                                                                                                                                                                                                                                                                                                                                                                                                                                                                                                                                                                                                                                                                                                                                                                            | NA                                                                                                                                                                                                                                                                                                                                                                                                                                                                                                                                                                                                   |
| <b>Resources required</b>                                                                                                                                                                                                                                                                                                                                                                      |                                                                                                                                                                                                                                                                                                                                                                                                                                                                                                                                                                                                                                                                                                                                                                                                                                                                                                                                                                                                                                                                                                                                                                                                                                                                                                                                                                                                                                                                                                                                                                                                                                                                                                |                                                                                                                                                                                                                                                                                                                                                                                                                                                                                                                                                                                                      |
| How large are the resource requirements (costs)?                                                                                                                                                                                                                                                                                                                                               |                                                                                                                                                                                                                                                                                                                                                                                                                                                                                                                                                                                                                                                                                                                                                                                                                                                                                                                                                                                                                                                                                                                                                                                                                                                                                                                                                                                                                                                                                                                                                                                                                                                                                                |                                                                                                                                                                                                                                                                                                                                                                                                                                                                                                                                                                                                      |
| <b>Judgement</b>                                                                                                                                                                                                                                                                                                                                                                               | <b>Research evidence</b>                                                                                                                                                                                                                                                                                                                                                                                                                                                                                                                                                                                                                                                                                                                                                                                                                                                                                                                                                                                                                                                                                                                                                                                                                                                                                                                                                                                                                                                                                                                                                                                                                                                                       | <b>Additional considerations</b>                                                                                                                                                                                                                                                                                                                                                                                                                                                                                                                                                                     |
| <input type="radio"/> Large costs<br><input checked="" type="checkbox"/> <b>Moderate costs</b><br><input type="radio"/> Negligible costs and savings<br><input type="radio"/> Moderate savings<br><input type="radio"/> Large savings<br><input type="radio"/> Varies<br><input type="radio"/> Don't know                                                                                      | <p>Investigations to screen for PAH in SSC are clearly identified for a defined population (e.g. DETECT, Coghlan <i>et al.</i><sup>232</sup>) and costings are moderate.</p> <p>Other screening programmes exist where the testing algorithm is also clearly defined.<sup>229,240</sup></p> <p>However, there are no currently available data on costing a lifetime strategy for screening and early detection approaches for PAH in SSC.</p> <p>Importantly, the data for the optimal interval between screening for PAH in SSC is unknown. Given that risk factors exist for the development of PAH, there has been some discussion as to whether approaches to screening should be based on evaluation of risk factors for PAH.<sup>236</sup> This has resulted in approaches that incorporate the use of risk factors to aid subsequent deployment of investigative/screening strategies for PAH in SSC. Semalulu <i>et al.</i> have proposed a simple prediction model integrating symptoms, DLCO, and NT-proBNP that identified subjects at very low probability of PAH, who could potentially forgo further specific testing for PAH.<sup>241</sup></p> <p>A recent meta-analysis of the use of video capillaroscopy showed that a reduction in capillary density or progression to a severe active/late pattern of vascular involvement is also a risk factor for PAH; however, the clinical utility of incorporating this into current algorithms has not been assessed.<sup>242</sup></p> <p>Other investigators have identified angiogenic and inflammatory biomarkers, chemokines, microRNAs. and chemokines that may potentially aid decisions regarding subsequent screening</p> | NA                                                                                                                                                                                                                                                                                                                                                                                                                                                                                                                                                                                                   |

Continued

| <p>intervals, although data are limited and the findings exploratory.<sup>243</sup><br/>                 For patients meeting criteria for RHC following non-invasive screening, additional non-invasive tests to refine the need for RHC have also been evaluated. Santaniello <i>et al.</i> performed CPET in patients identified from the DETECT screening regimen.<sup>244</sup> They postulated that determination of the VE/VCO<sub>2</sub> slope in DETECT-positive patients may reduce the need for invasive procedures such as RHC. Hagger <i>et al.</i> and Rajaram <i>et al.</i> evaluated magnetic resonance imaging (MRI) in patients with SSc and CTD, and showed that MRI cannot exclude patients with SSc-PAH but can identify patients with a low risk of mortality.<sup>245,246</sup> There is, however, no economic analysis of the cost of implementing either of these approaches in the diagnostic pathway.<br/>                 In summary, the resources required to screen for PAH in SSc and facilitate early detection are dependent on the overarching approach and the frequency with which they are conducted. Appraisal of the current evidence supports the application of DETECT for a defined cohort of patients with SSc and an approach based on a risk assessment for PAH in SSc made pragmatically on a yearly basis for patients ineligible for screening or those who have been screened and did not require further PAH investigation.</p> |                                                                                                                                                                                                                                                                                                                                                                                                                                                                                                                                                                                                                                                        |                           |
|-------------------------------------------------------------------------------------------------------------------------------------------------------------------------------------------------------------------------------------------------------------------------------------------------------------------------------------------------------------------------------------------------------------------------------------------------------------------------------------------------------------------------------------------------------------------------------------------------------------------------------------------------------------------------------------------------------------------------------------------------------------------------------------------------------------------------------------------------------------------------------------------------------------------------------------------------------------------------------------------------------------------------------------------------------------------------------------------------------------------------------------------------------------------------------------------------------------------------------------------------------------------------------------------------------------------------------------------------------------------------------------------------------------------------------------------------------------------------------------|--------------------------------------------------------------------------------------------------------------------------------------------------------------------------------------------------------------------------------------------------------------------------------------------------------------------------------------------------------------------------------------------------------------------------------------------------------------------------------------------------------------------------------------------------------------------------------------------------------------------------------------------------------|---------------------------|
| <p><b>Certainty of evidence of required resources</b><br/>                 What is the certainty of the evidence of resource requirements (costs)?</p>                                                                                                                                                                                                                                                                                                                                                                                                                                                                                                                                                                                                                                                                                                                                                                                                                                                                                                                                                                                                                                                                                                                                                                                                                                                                                                                              |                                                                                                                                                                                                                                                                                                                                                                                                                                                                                                                                                                                                                                                        |                           |
| Judgement                                                                                                                                                                                                                                                                                                                                                                                                                                                                                                                                                                                                                                                                                                                                                                                                                                                                                                                                                                                                                                                                                                                                                                                                                                                                                                                                                                                                                                                                           | Research evidence                                                                                                                                                                                                                                                                                                                                                                                                                                                                                                                                                                                                                                      | Additional considerations |
| <input type="radio"/> Very low<br><input type="radio"/> Low<br><input checked="" type="radio"/> <b>Moderate</b><br><input type="radio"/> High<br><input type="radio"/> No included studies                                                                                                                                                                                                                                                                                                                                                                                                                                                                                                                                                                                                                                                                                                                                                                                                                                                                                                                                                                                                                                                                                                                                                                                                                                                                                          | <p>Limited published data on screening costs and estimated costs appear conservative.<sup>235</sup> Costs of tests will vary between institutions; however, recommendations regarding testing enables institutions to cost implementation of a screening programme for SSc.<br/>                 Despite the lack of large-scale studies, the proposed screening regimens do allow for costing of the economic impact.<br/>                 See section above.</p>                                                                                                                                                                                     | NA                        |
| <p><b>Cost-effectiveness</b><br/>                 Does the cost-effectiveness of the intervention favour the intervention or the comparison?</p>                                                                                                                                                                                                                                                                                                                                                                                                                                                                                                                                                                                                                                                                                                                                                                                                                                                                                                                                                                                                                                                                                                                                                                                                                                                                                                                                    |                                                                                                                                                                                                                                                                                                                                                                                                                                                                                                                                                                                                                                                        |                           |
| Judgement                                                                                                                                                                                                                                                                                                                                                                                                                                                                                                                                                                                                                                                                                                                                                                                                                                                                                                                                                                                                                                                                                                                                                                                                                                                                                                                                                                                                                                                                           | Research evidence                                                                                                                                                                                                                                                                                                                                                                                                                                                                                                                                                                                                                                      | Additional considerations |
| <input type="radio"/> Favours the comparison<br><input type="radio"/> Probably favours the comparison<br><input type="radio"/> Does not favour either the intervention or the comparison<br><input type="radio"/> Probably favours the intervention<br><input type="radio"/> Favours the intervention<br><input checked="" type="radio"/> <b>Varies</b><br><input type="radio"/> No included studies                                                                                                                                                                                                                                                                                                                                                                                                                                                                                                                                                                                                                                                                                                                                                                                                                                                                                                                                                                                                                                                                                | <p>Limited published data on screening costs and estimated costs appear conservative.<sup>235</sup><br/>                 Used costs will vary depending on the screening approach.<br/>                 It is believed that there are no data on cost-effectiveness of screening or not screening for PAH in SSc. Given current practice, it is unlikely that a prospective study examining the economic impact of screening vs. not screening for PAH in SSc will be performed.<br/>                 There is the potential, however, to compare the cost-effectiveness of different approaches or to model the cost of screening for PAH in SSc.</p> | NA                        |
| <p><b>Equity</b><br/>                 What would be the impact on health equity?</p>                                                                                                                                                                                                                                                                                                                                                                                                                                                                                                                                                                                                                                                                                                                                                                                                                                                                                                                                                                                                                                                                                                                                                                                                                                                                                                                                                                                                |                                                                                                                                                                                                                                                                                                                                                                                                                                                                                                                                                                                                                                                        |                           |
| Judgement                                                                                                                                                                                                                                                                                                                                                                                                                                                                                                                                                                                                                                                                                                                                                                                                                                                                                                                                                                                                                                                                                                                                                                                                                                                                                                                                                                                                                                                                           | Research evidence                                                                                                                                                                                                                                                                                                                                                                                                                                                                                                                                                                                                                                      | Additional considerations |
| <input type="radio"/> Reduced<br><input type="radio"/> Probably reduced<br><input type="radio"/> Probably no impact<br><input checked="" type="radio"/> <b>Probably increased</b><br><input type="radio"/> Increased<br><input type="radio"/> Varies<br><input type="radio"/> Don't know                                                                                                                                                                                                                                                                                                                                                                                                                                                                                                                                                                                                                                                                                                                                                                                                                                                                                                                                                                                                                                                                                                                                                                                            | <p>Given that individuals who are socially and economically disadvantaged may delay seeking medical care, screening and early detection approaches at a population-based level in patients with SSc will probably increase health equity.</p>                                                                                                                                                                                                                                                                                                                                                                                                          | NA                        |

Continued

| <b>Acceptability</b>                                                                                                                                                                                                      |                                                                                                                                                                                                                                                                                                                                                                                                                                                                                                                                                                                                                                                                                                                                                                                                                                                                                                                                                                                     |                                  |
|---------------------------------------------------------------------------------------------------------------------------------------------------------------------------------------------------------------------------|-------------------------------------------------------------------------------------------------------------------------------------------------------------------------------------------------------------------------------------------------------------------------------------------------------------------------------------------------------------------------------------------------------------------------------------------------------------------------------------------------------------------------------------------------------------------------------------------------------------------------------------------------------------------------------------------------------------------------------------------------------------------------------------------------------------------------------------------------------------------------------------------------------------------------------------------------------------------------------------|----------------------------------|
| Is the intervention acceptable to key stakeholders?                                                                                                                                                                       |                                                                                                                                                                                                                                                                                                                                                                                                                                                                                                                                                                                                                                                                                                                                                                                                                                                                                                                                                                                     |                                  |
| <b>Judgement</b>                                                                                                                                                                                                          | <b>Research evidence</b>                                                                                                                                                                                                                                                                                                                                                                                                                                                                                                                                                                                                                                                                                                                                                                                                                                                                                                                                                            | <b>Additional considerations</b> |
| <input type="radio"/> No<br><input type="radio"/> Probably no<br><input type="radio"/> Probably yes<br><input checked="" type="checkbox"/> <b>Yes</b><br><input type="radio"/> Varies<br><input type="radio"/> Don't know | <p>Given the high prevalence of PAH, its impact on outcomes and data supporting diagnosis of less severe disease (which appears to be more treatment responsive), screening for PAH in patients with SSc is well accepted within the health care community and is recommended by learned societies<sup>247</sup> and by consensus statements from the international community.<sup>248</sup></p> <p>Screening is also endorsed by patient organizations and the high uptake amongst patients reflects that this approach is generally acceptable. The Scleroderma and Raynaud's UK charity (SRUK) notes 'annual tests are essential to monitor the progression of scleroderma and something you are entitled to as a patient' and 'if any of these tests are not being performed and you feel they should be, tell your doctor...'<br/> <a href="https://www.sruk.co.uk/scleroderma/annual-tests-scleroderma/">https://www.sruk.co.uk/scleroderma/annual-tests-scleroderma/</a></p> | NA                               |
| <b>Feasibility</b>                                                                                                                                                                                                        |                                                                                                                                                                                                                                                                                                                                                                                                                                                                                                                                                                                                                                                                                                                                                                                                                                                                                                                                                                                     |                                  |
| Is the intervention feasible to implement?                                                                                                                                                                                |                                                                                                                                                                                                                                                                                                                                                                                                                                                                                                                                                                                                                                                                                                                                                                                                                                                                                                                                                                                     |                                  |
| <b>Judgement</b>                                                                                                                                                                                                          | <b>Research evidence</b>                                                                                                                                                                                                                                                                                                                                                                                                                                                                                                                                                                                                                                                                                                                                                                                                                                                                                                                                                            | <b>Additional considerations</b> |
| <input type="radio"/> No<br><input type="radio"/> Probably no<br><input type="radio"/> Probably yes<br><input checked="" type="checkbox"/> <b>Yes</b><br><input type="radio"/> Varies<br><input type="radio"/> Don't know | <p>Yes. Published evidence from multiple countries confirms that screening using a number of different approaches is feasible to implement in a real-world setting (i.e. outside the context of a clinical trial).<sup>233,235,236,241</sup></p>                                                                                                                                                                                                                                                                                                                                                                                                                                                                                                                                                                                                                                                                                                                                    | NA                               |

© ESC/ERS 2022

## SUMMARY OF JUDGEMENTS

|                                                            | <b>Judgement</b> |             |                 |               |    |               |                     |
|------------------------------------------------------------|------------------|-------------|-----------------|---------------|----|---------------|---------------------|
|                                                            | No               | Probably no | Probably yes    | <b>Yes</b>    | NA | Varies        | Don't know          |
| <b>Problem</b>                                             | No               | Probably no | Probably yes    | <b>Yes</b>    | NA | Varies        | Don't know          |
| <b>Test accuracy</b>                                       | Very inaccurate  | Inaccurate  | Accurate        | Very accurate | NA | <b>Varies</b> | Don't know          |
| <b>Desirable effects</b>                                   | Trivial          | Small       | Moderate        | <b>Large</b>  | NA | Varies        | Don't know          |
| <b>Undesirable effects</b>                                 | Large            | Moderate    | <b>Small</b>    | Trivial       | NA | Varies        | Don't know          |
| <b>Certainty of the evidence of test accuracy</b>          | Very low         | Low         | Moderate        | <b>High</b>   | NA | NA            | No included studies |
| <b>Certainty of the evidence of test effects</b>           | Very low         | Low         | <b>Moderate</b> | High          | NA | NA            | No included studies |
| <b>Certainty of the evidence of management effects</b>     | Very low         | Low         | <b>Moderate</b> | High          | NA | NA            | No included studies |
| <b>Certainty of the evidence of test result/management</b> | Very low         | Low         | <b>Moderate</b> | High          | NA | NA            | No included studies |
| <b>Certainty of effects</b>                                | Very low         | Low         | Moderate        | <b>High</b>   | NA | NA            | No included studies |

Continued

|                                                    |                                      |                                               |                                                           |                                         |                                 |               |                     |
|----------------------------------------------------|--------------------------------------|-----------------------------------------------|-----------------------------------------------------------|-----------------------------------------|---------------------------------|---------------|---------------------|
| <b>Values</b>                                      | Important uncertainty or variability | Possibly important uncertainty or variability | <b>Probably no important uncertainty or variability</b>   | No important uncertainty or variability | NA                              | NA            | NA                  |
| <b>Balance of effects</b>                          | Favours the comparison               | Probably favours the comparison               | Does not favour either the intervention or the comparison | Probably favours the intervention       | <b>Favours the intervention</b> | Varies        | Don't know          |
| <b>Resources required</b>                          | Large costs                          | <b>Moderate costs</b>                         | Negligible costs and savings                              | Moderate savings                        | Large savings                   | Varies        | Don't know          |
| <b>Certainty of evidence of required resources</b> | Very low                             | Low                                           | <b>Moderate</b>                                           | High                                    | NA                              | NA            | No included studies |
| <b>Cost-effectiveness</b>                          | Favours the comparison               | Probably favours the comparison               | Does not favour either the intervention or the comparison | Probably favours the intervention       | Favours the intervention        | <b>Varies</b> | No included studies |
| <b>Equity</b>                                      | Reduced                              | Probably reduced                              | Probably no impact                                        | <b>Probably increased</b>               | Increased                       | Varies        | Don't know          |
| <b>Acceptability</b>                               | No                                   | Probably no                                   | Probably yes                                              | <b>Yes</b>                              | NA                              | Varies        | Don't know          |
| <b>Feasibility</b>                                 | No                                   | Probably no                                   | Probably yes                                              | <b>Yes</b>                              | NA                              | Varies        | Don't know          |

© ESC/ERS 2022

**TYPE OF RECOMMENDATION**

|                                                |                                                     |                                                                          |                                                 |                                            |
|------------------------------------------------|-----------------------------------------------------|--------------------------------------------------------------------------|-------------------------------------------------|--------------------------------------------|
| Strong recommendation against the intervention | Conditional recommendation against the intervention | Conditional recommendation for either the intervention or the comparison | Conditional recommendation for the intervention | Strong recommendation for the intervention |
| ○                                              | ○                                                   | ○                                                                        | ○                                               | ☑                                          |

© ESC/ERS 2022

Pulmonary arterial hypertension has a high prevalence in SSc and its development negatively impacts QoL. Data support a strong recommendation for screening selected asymptomatic patients with SSc for PAH. Assessing the risk of having PAH is also recommended in patients with SSc who do not meet the criteria for asymptomatic screening, to facilitate early detection.

**CONCLUSIONS**

**Recommendations**

- In adult systemic sclerosis (SSc) patients with >3 years of disease duration, an FVC ≥40%, and a DLCO <60%, the DETECT algorithm is recommended for identifying asymptomatic patients with PAH.  
**Class I Level B (key references below<sup>232</sup>)**
- An annual evaluation of the risk of having PAH is recommended in patients with SSc.  
**Class I Level B (key references below<sup>240,241,249</sup>)**
- In SSc, the risk of having PAH should be evaluated to decide the need for further investigations.  
**Class IIa Level B (key references below<sup>241</sup>)**
- In SSc, evaluation of the risk of having PAH should be based on an evaluation of breathlessness, in combination with either an echocardiogram or lung function testing and NT-proBNP.  
**Class IIa Level B (key references below<sup>229,233</sup>)**
- Hospitals managing patients with SSc should have policies in place to facilitate the risk of having PAH based on the availability of local testing.  
**Class IIa Level C (key references below<sup>3</sup>)**
- Exercise echocardiography, or CPET, or CMR may be used to aid decisions to perform RHC in symptomatic patients with SSc.  
**Class IIb Level C (key references below<sup>244,245</sup>)**

**Justification**

**Strong recommendation for screening for PAH in SSc**

The prevalence of PAH is high (5–19%) in SSc and the leading cause of death due to SSc-related organ involvement. Screening of asymptomatic patients and early detection of PAH in those who would not otherwise have sought medical advice is practical, detects less severe haemodynamic disease, and, compared with contemporary non-screened cohorts, is associated with improved survival. Screening for PAH is endorsed by organizations supporting people affected by

*Continued*

SSc. Therapies for PAH are available, of moderate cost, and prevent clinical worsening. Current challenges relate to refining strategies to i) assess for the risk of having PAH; ii) establish the optimal frequency for undertaking screening; iii) reduce the need for invasive testing with RHC to confirm or refute a diagnosis of PAH; and iv) improve cost-effectiveness and acceptability to patients.

See text; key references for each recommendation are highlighted below.

<sup>a</sup>based on expert opinion.

#### Subgroup considerations

In adult SSc patients with >3 years of disease duration, an FVC  $\geq$ 40%, and DLCO <60%, the DETECT algorithm is recommended for identifying asymptomatic patients with PAH.

#### Implementation considerations

To facilitate screening for PAH in SSc, hospitals managing patients with SSc should have policies in place to aid assessment for PAH.

#### Monitoring and evaluation

Rheumatology centres should conduct regular audit of screening and early detection approaches for patients with SSc.

#### Research priorities

Evaluation of the economic impact, acceptability to patients of screening regimens, and approaches to early detection of PAH in patients with SSc.

Improved identification of patients at low and high risk of developing PAH using novel biomarkers and approaches.

Understand the acceptability of and barriers to screening and early detection of PAH in SSc, in patients and health care professionals. Improved understanding of the incidence of PAH in connective tissues diseases other than SSc and how to improve early detection of PAH in these patients.

© ESC/ERS 2022

## 16.7. Evidence to Decision for key narrative question 4

**Table S15** Evidence to Decision for key narrative question 4

### QUESTION 4 (NARRATIVE)

#### Should a risk-stratification strategy be used to guide treatment in pulmonary arterial hypertension?

|                                     |                                                                                                                                                                                                                                                                                                                                                                                   |
|-------------------------------------|-----------------------------------------------------------------------------------------------------------------------------------------------------------------------------------------------------------------------------------------------------------------------------------------------------------------------------------------------------------------------------------|
| <b>Population</b>                   | Adult (aged $\geq$ 18 years) patients with pulmonary arterial hypertension (PAH).                                                                                                                                                                                                                                                                                                 |
| <b>Intervention</b>                 | Risk stratification instruments (SPAHR/COMPORA, French invasive, French non-invasive, and REVEAL-based scores).<br>KQ4 - Should a risk-stratification strategy be used to guide treatment in patients with PAH?<br>(Chosen risk stratification instruments being French invasive, French noninvasive, SPAHR/COMPORA, and REVEAL-based scores (REVEAL, REVEAL 2.0, REVEAL Lite 2). |
| <b>Purpose of the test/<br/>KQ4</b> | To assess the value of risk stratification.                                                                                                                                                                                                                                                                                                                                       |
| <b>Role of the test</b>             | To guide treatment in PAH.                                                                                                                                                                                                                                                                                                                                                        |
| <b>Linked treatments</b>            | PAH treatments, targeting the endothelin, nitric oxide, and prostacyclin pathways.                                                                                                                                                                                                                                                                                                |
| <b>Main outcomes</b>                | NA                                                                                                                                                                                                                                                                                                                                                                                |
| <b>Setting</b>                      | NA                                                                                                                                                                                                                                                                                                                                                                                |
| <b>Perspective</b>                  | NA                                                                                                                                                                                                                                                                                                                                                                                |
| <b>Background</b>                   | NA                                                                                                                                                                                                                                                                                                                                                                                |
| <b>Subgroups</b>                    | NA                                                                                                                                                                                                                                                                                                                                                                                |
| <b>Conflict of interests</b>        | NA                                                                                                                                                                                                                                                                                                                                                                                |

© ESC/ERS 2022

**ASSESSMENT**

**Problem**

Is the problem a priority? (Is it important to apply multiparametric risk stratification?)

| Judgement                                                                                                                                                                                                                 | Research evidence                                                                                                                                                                                                                                                      | Additional considerations |
|---------------------------------------------------------------------------------------------------------------------------------------------------------------------------------------------------------------------------|------------------------------------------------------------------------------------------------------------------------------------------------------------------------------------------------------------------------------------------------------------------------|---------------------------|
| <input type="radio"/> No<br><input type="radio"/> Probably no<br><input type="radio"/> Probably yes<br><input checked="" type="checkbox"/> <b>Yes</b><br><input type="radio"/> Varies<br><input type="radio"/> Don't know | According to the 2015 ESC/ERS PH guidelines, there is no single parameter that provides adequate prognostic information in PAH. <sup>247,250</sup><br>Multiparametric risk stratification is intimately associated with mortality and provides prognostic information. | NA                        |

**Test accuracy**

How accurate is the test? (How accurate is risk stratification?)

| Judgement (concordance statistics)                                                                                                                                                                                                                                                                                                                   | Research evidence                                                                                                                                                                                                        | Additional considerations                                                                                                                                                                                                                                                           |
|------------------------------------------------------------------------------------------------------------------------------------------------------------------------------------------------------------------------------------------------------------------------------------------------------------------------------------------------------|--------------------------------------------------------------------------------------------------------------------------------------------------------------------------------------------------------------------------|-------------------------------------------------------------------------------------------------------------------------------------------------------------------------------------------------------------------------------------------------------------------------------------|
| <input type="radio"/> Very inaccurate ( $\leq 0.5$ )<br><input type="radio"/> Inaccurate (0.51–0.6)<br><input checked="" type="checkbox"/> <b>Moderately accurate (0.61–0.8)</b><br><input type="radio"/> Accurate (0.81–0.9)<br><input type="radio"/> Very accurate ( $> 0.9$ )<br><input type="radio"/> Varies<br><input type="radio"/> Don't know | Depending on the risk stratification strategy used, concordance statistics for estimated 1 year survival ranged 0.62–0.76, <sup>251</sup> and for transplant free survival $> 5$ years between 0.56–0.70. <sup>252</sup> | Weighting of parameters.<br>Invasive vs. non-invasive as well as modifiable vs. non-modifiable.<br>Additional variables for future refinement of risk stratification and prognostication (echocardiography/CMRI, CPET, biochemical markers, and patient-reported outcome measures). |

**Desirable effects**

How substantial are the desirable anticipated effects? (What are the advantages of risk stratification?)

| Judgement                                                                                                                                                                                                              | Research evidence                                                                                                                                                                                       | Additional considerations                                                                                                             |
|------------------------------------------------------------------------------------------------------------------------------------------------------------------------------------------------------------------------|---------------------------------------------------------------------------------------------------------------------------------------------------------------------------------------------------------|---------------------------------------------------------------------------------------------------------------------------------------|
| <input type="radio"/> Trivial<br><input type="radio"/> Small<br><input type="radio"/> Moderate<br><input checked="" type="checkbox"/> <b>Large</b><br><input type="radio"/> Varies<br><input type="radio"/> Don't know | Risk stratifications provide estimation of short- and long-term outcome. <sup>251,253–257</sup><br>Most risk assessment strategies are feasible and flexible in terms of available/included parameters. | Although the strategies are somewhat flexible, accuracy may vary depending on the included/available variables and selected strategy. |

**Undesirable effects**

How substantial are the undesirable anticipated effects? (What are the disadvantages of risk stratification?)

| Judgement                                                                                                                                                                                                              | Research evidence                                                                                                                                                                                                                     | Additional considerations                                                                                                                                                                                                                                                                      |
|------------------------------------------------------------------------------------------------------------------------------------------------------------------------------------------------------------------------|---------------------------------------------------------------------------------------------------------------------------------------------------------------------------------------------------------------------------------------|------------------------------------------------------------------------------------------------------------------------------------------------------------------------------------------------------------------------------------------------------------------------------------------------|
| <input type="radio"/> Large<br><input type="radio"/> Moderate<br><input type="radio"/> Small<br><input checked="" type="checkbox"/> <b>Trivial</b><br><input type="radio"/> Varies<br><input type="radio"/> Don't know | May require invasive assessment.<br>May require many parameters.<br>Consensus on the optimal combination of parameters remain unclear.<br>A large intermediate-risk group (now resolved into low–intermediate and high–intermediate). | Some patients may still have poor prognosis, despite being in a low-risk profile, depending for how long the right ventricle can withstand the high pressure and resistance in the pulmonary circulation.<br>Risk assessment does not currently involve the patient-reported outcome measures. |

**Certainty of the evidence of test accuracy**

What is the overall certainty of the evidence of test accuracy? (What is the evidence on risk stratification in prognostication?)

| Judgement                                                                                                                                                                                     | Research evidence                                                                                                                                                                                                                | Additional considerations |
|-----------------------------------------------------------------------------------------------------------------------------------------------------------------------------------------------|----------------------------------------------------------------------------------------------------------------------------------------------------------------------------------------------------------------------------------|---------------------------|
| <input type="radio"/> Very low<br><input type="radio"/> Low<br><input checked="" type="checkbox"/> <b>Moderate</b><br><input type="radio"/> High<br><input type="radio"/> No included studies | Evidence based on large independent retrospective studies (they have validated and provided concordance statistics). <sup>251–255,258</sup> The lack of prospective studies suggests a downgrade from high to moderate evidence. | NA                        |

Continued

**Certainty of the evidence of test effects**

What is the overall certainty of the evidence for any critical or important direct benefits, adverse effects or burden of the test?

| Judgement                                                                                                                                                                | Research evidence | Additional considerations |
|--------------------------------------------------------------------------------------------------------------------------------------------------------------------------|-------------------|---------------------------|
| <input type="radio"/> Very low<br><input type="radio"/> Low<br><input type="radio"/> Moderate<br><input type="radio"/> High<br><input type="radio"/> No included studies | NA                | NA                        |

**Certainty of the evidence of management effects**

What is the overall certainty of the evidence of effects of the management that is guided by the test results? (Evidence of KQ4?)

| Judgement                                                                                                                                                                                                          | Research evidence                                                                                                                                                              | Additional considerations                        |
|--------------------------------------------------------------------------------------------------------------------------------------------------------------------------------------------------------------------|--------------------------------------------------------------------------------------------------------------------------------------------------------------------------------|--------------------------------------------------|
| <input type="radio"/> Very low<br><input checked="" type="checkbox"/> <b>Low</b><br><input checked="" type="checkbox"/> <b>Moderate</b><br><input type="radio"/> High<br><input type="radio"/> No included studies | Although several studies have demonstrated an intimate relation between the use of PAH treatment and change in risk scores, prospective studies are needed. <sup>259–262</sup> | Low–moderate due to lack of prospective studies. |

**Certainty of the evidence of test result/management**

How certain is the link between test results and management decisions?

| Judgement                                                                                                                                                                | Research evidence | Additional considerations |
|--------------------------------------------------------------------------------------------------------------------------------------------------------------------------|-------------------|---------------------------|
| <input type="radio"/> Very low<br><input type="radio"/> Low<br><input type="radio"/> Moderate<br><input type="radio"/> High<br><input type="radio"/> No included studies | NA                | NA                        |

**Certainty of effects**

What is the overall certainty of the evidence of effects of the test? (What is the overall certainty of the evidence of effects of risk assessment?)

| Judgement                                                                                                                                                                                     | Research evidence                                                                                                                      | Additional considerations                                                         |
|-----------------------------------------------------------------------------------------------------------------------------------------------------------------------------------------------|----------------------------------------------------------------------------------------------------------------------------------------|-----------------------------------------------------------------------------------|
| <input type="radio"/> Very low<br><input type="radio"/> Low<br><input type="radio"/> Moderate<br><input checked="" type="checkbox"/> <b>High</b><br><input type="radio"/> No included studies | Achieving a low-risk status is consistent with an excellent outcome, supporting a goal-orientated approach. <sup>257,259–261,263</sup> | Some patients may achieve a low-risk profile but may still have a poor prognosis. |

**Values**

Is there important uncertainty about or variability in how much people value the main outcomes? (What patients may value as important, and what they think about using risk stratification to guide treatment. Assumptions?)

| Judgement                                                                                                                                                                                                                                                                                         | Research evidence | Additional considerations |
|---------------------------------------------------------------------------------------------------------------------------------------------------------------------------------------------------------------------------------------------------------------------------------------------------|-------------------|---------------------------|
| <input type="radio"/> Important uncertainty or variability<br><input type="radio"/> Possibly important uncertainty or variability<br><input checked="" type="checkbox"/> <b>Probably no important uncertainty or variability</b><br><input type="radio"/> No important uncertainty or variability | NA                | NA                        |

**Balance of effects**

Does the balance between desirable and undesirable effects favour the intervention or the comparison? (If the advantages/benefits of stratification outweigh the disadvantages/risks?)

| Judgement                                                                                                                                                 | Research evidence                                                                                                                                                           | Additional considerations |
|-----------------------------------------------------------------------------------------------------------------------------------------------------------|-----------------------------------------------------------------------------------------------------------------------------------------------------------------------------|---------------------------|
| <input type="radio"/> Favours the comparison<br><input type="radio"/> Probably favours the comparison<br><input type="radio"/> Does not favour either the | See <i>desirable effects</i> and <i>undesirable effects</i> with associated references. In short, the advantages of risk stratification outweigh the trivial disadvantages. | NA                        |

Continued



|                                                                                                                                                                                                                                                          |  |  |
|----------------------------------------------------------------------------------------------------------------------------------------------------------------------------------------------------------------------------------------------------------|--|--|
| intervention or the comparison<br><input type="radio"/> Probably favours the intervention<br><input checked="" type="checkbox"/> <b>Favours the intervention/risk stratification</b><br><input type="radio"/> Varies<br><input type="radio"/> Don't know |  |  |
|----------------------------------------------------------------------------------------------------------------------------------------------------------------------------------------------------------------------------------------------------------|--|--|

**Resources required**  
 How large are the resource requirements (costs)?

| Judgement                                                                                                                                                                                                                                                                                                 | Research evidence | Additional considerations                                                                                                                    |
|-----------------------------------------------------------------------------------------------------------------------------------------------------------------------------------------------------------------------------------------------------------------------------------------------------------|-------------------|----------------------------------------------------------------------------------------------------------------------------------------------|
| <input type="radio"/> Large costs<br><input type="radio"/> Moderate costs<br><input type="radio"/> Negligible costs and savings<br><input type="radio"/> Moderate savings<br><input type="radio"/> Large savings<br><input checked="" type="checkbox"/> <b>Varies</b><br><input type="radio"/> Don't know | NA                | It depends on the risk stratification strategy used, as well as patient status (patients with severe PAH require more extensive assessment). |

**Certainty of evidence of required resources**  
 What is the certainty of the evidence of resource requirements (costs)?

| Judgement                                                                                                                                                                                     | Research evidence | Additional considerations |
|-----------------------------------------------------------------------------------------------------------------------------------------------------------------------------------------------|-------------------|---------------------------|
| <input type="radio"/> Very low<br><input type="radio"/> Low<br><input type="radio"/> Moderate<br><input type="radio"/> High<br><input checked="" type="checkbox"/> <b>No included studies</b> | NA                | NA                        |

**Cost-effectiveness**  
 Does the cost-effectiveness of the intervention favour the intervention or the comparison?

| Judgement                                                                                                                                                                                                                                                                                                                                                                                               | Research evidence | Additional considerations |
|---------------------------------------------------------------------------------------------------------------------------------------------------------------------------------------------------------------------------------------------------------------------------------------------------------------------------------------------------------------------------------------------------------|-------------------|---------------------------|
| <input type="radio"/> Favours the comparison<br><input type="radio"/> Probably favours the comparison<br><input type="radio"/> Does not favour either the intervention or the comparison<br><input type="radio"/> Probably favours the intervention<br><input type="radio"/> Favours the intervention<br><input type="radio"/> Varies<br><input checked="" type="checkbox"/> <b>No included studies</b> | NA                | NA                        |

**Equity**  
 What would be the impact on health equity? (Would applying risk stratification impact health equity?)

| Judgement                                                                                                                                                                                                                                                                                   | Research evidence | Additional considerations                                                                                                             |
|---------------------------------------------------------------------------------------------------------------------------------------------------------------------------------------------------------------------------------------------------------------------------------------------|-------------------|---------------------------------------------------------------------------------------------------------------------------------------|
| <input type="radio"/> Reduced<br><input type="radio"/> Probably reduced<br><input type="radio"/> Probably no impact<br><input type="radio"/> Probably increased<br><input type="radio"/> Increased<br><input checked="" type="checkbox"/> <b>Varies</b><br><input type="radio"/> Don't know | NA                | Equity depends on the country in which risk stratification is performed, and the health care system, infrastructure, insurances, etc. |

Continued

|                                                                                                                                                                                                                                                            |                                           |                                                                                                                                                                                                                                                                                                                                                                                              |
|------------------------------------------------------------------------------------------------------------------------------------------------------------------------------------------------------------------------------------------------------------|-------------------------------------------|----------------------------------------------------------------------------------------------------------------------------------------------------------------------------------------------------------------------------------------------------------------------------------------------------------------------------------------------------------------------------------------------|
| <p><b>Acceptability</b><br/>Is the intervention acceptable to key stakeholders? (Is the intervention (risk assessment) acceptable to key stakeholders [clinicians, patients])?</p>                                                                         |                                           |                                                                                                                                                                                                                                                                                                                                                                                              |
| <p><b>Judgement</b></p> <p><input type="radio"/> No<br/><input type="radio"/> Probably no<br/><input type="radio"/> Probably yes<br/><input checked="" type="radio"/> <b>Yes</b><br/><input type="radio"/> Varies<br/><input type="radio"/> Don't know</p> | <p><b>Research evidence</b></p> <p>NA</p> | <p><b>Additional considerations</b></p> <p>NA</p>                                                                                                                                                                                                                                                                                                                                            |
| <p><b>Feasibility</b><br/>Is the intervention feasible to implement? (Is there available infrastructure, or a lot of organizations that are needed to implement risk stratification or KQ4?)</p>                                                           |                                           |                                                                                                                                                                                                                                                                                                                                                                                              |
| <p><b>Judgement</b></p> <p><input type="radio"/> No<br/><input type="radio"/> Probably no<br/><input type="radio"/> Probably yes<br/><input checked="" type="radio"/> <b>Yes</b><br/><input type="radio"/> Varies<br/><input type="radio"/> Don't know</p> | <p><b>Research evidence</b></p> <p>NA</p> | <p><b>Additional considerations</b></p> <p>Most of the parameters are obtainable by means of clinical assessment/imaging/RHC/blood study at diagnosis or follow-up, where invasive and non-invasive parameters are included. However, depending on the infrastructure and country, the availability of expert PH centres could impact the establishment of diagnosis and implementation.</p> |

© ESC/ERS 2022

**SUMMARY OF JUDGEMENTS**

| Problem                                                | Judgement       |             |                            |                |               |        |                     |
|--------------------------------------------------------|-----------------|-------------|----------------------------|----------------|---------------|--------|---------------------|
|                                                        | No              | Probably no | Probably yes               | Yes            | NA            | Varies | Don't know          |
| <b>Test accuracy</b>                                   | Very inaccurate | Inaccurate  | <b>Moderately accurate</b> | Accurate       | Very accurate | Varies | Don't know          |
| <b>Desirable effects</b>                               | Trivial         | Small       | Moderate                   | <b>Large</b>   | NA            | Varies | Don't know          |
| <b>Undesirable effects</b>                             | Large           | Moderate    | Small                      | <b>Trivial</b> | NA            | Varies | Don't know          |
| <b>Certainty of the evidence of test accuracy</b>      | Very low        | Low         | <b>Moderate</b>            | High           | NA            | NA     | No included studies |
| <b>Certainty of the evidence of management effects</b> | Very low        | <b>Low</b>  | <b>Moderate</b>            | High           | NA            | NA     | No included studies |
| <b>Certainty of effects</b>                            | Very low        | Low         | Moderate                   | <b>High</b>    | NA            | NA     | No included studies |

Continued

|                                                    |                                      |                                               |                                                           |                                         |                                 |               |                            |
|----------------------------------------------------|--------------------------------------|-----------------------------------------------|-----------------------------------------------------------|-----------------------------------------|---------------------------------|---------------|----------------------------|
| <b>Values</b>                                      | Important uncertainty or variability | Possibly important uncertainty or variability | <b>Probably no important uncertainty or variability</b>   | No important uncertainty or variability | NA                              | NA            | NA                         |
| <b>Balance of effects</b>                          | Favours the comparison               | Probably favours the comparison               | Does not favour either the intervention or the comparison | Probably favours the intervention       | <b>Favours the intervention</b> | Varies        | Don't know                 |
| <b>Resources required</b>                          | Large costs                          | Moderate costs                                | Negligible costs and savings                              | Moderate savings                        | Large savings                   | <b>Varies</b> | Don't know                 |
| <b>Certainty of evidence of required resources</b> | Very low                             | Low                                           | Moderate                                                  | High                                    | NA                              | NA            | <b>No included studies</b> |
| <b>Cost-effectiveness</b>                          | Favours the comparison               | Probably favours the comparison               | Does not favour either the intervention or the comparison | Probably favours the intervention       | Favours the intervention        | Varies        | <b>No included studies</b> |
| <b>Equity</b>                                      | Reduced                              | Probably reduced                              | Probably no impact                                        | Probably increased                      | Increased                       | <b>Varies</b> | Don't know                 |
| <b>Acceptability</b>                               | No                                   | Probably no                                   | Probably yes                                              | <b>Yes</b>                              | NA                              | Varies        | Don't know                 |
| <b>Feasibility</b>                                 | No                                   | Probably no                                   | Probably yes                                              | <b>Yes</b>                              | NA                              | Varies        | Don't know                 |

© ESC/ERS 2022

## CONCLUSIONS

### Recommendations

It is recommended to evaluate disease severity in patients with PAH with a panel of data derived from clinical assessment, exercise tests, biochemical markers, and echocardiographic and haemodynamic evaluations.

It is recommended to perform regular follow-up assessments in patients with PAH, depending on their stability, need, risk category, demographics, and comorbidities.

Achieving and maintaining a low-risk profile on optimized medical therapy is recommended as a treatment goal in patients with PAH.

Achieving and maintaining an intermediate-risk profile on optimized medical therapy is considered as an inadequate status for most patients with PAH.

### Justification

**See provided document and references in Section 6.2.5:** Comprehensive prognostic evaluation and risk assessment in PAH, as well as *Table 16* (recommendations for evaluation of severity of PAH and clinical status on therapy), in which proposed changes are stated.

### Subgroup considerations

### Implementation considerations

### Monitoring and evaluation

### Research priorities

### Future directions

Consider further substratification of the intermediate-risk group into low–intermediate and high–intermediate.

© ESC/ERS 2022

## 16.8. Evidence to Decision for key narrative question 5

**Table S16 Evidence to Decision for key narrative question 5**

### QUESTION 5 (NARRATIVE)

| Should drugs approved for pulmonary hypertension be used in patients with pulmonary hypertension associated with left heart disease? |                                                                                                                                                                                   |
|--------------------------------------------------------------------------------------------------------------------------------------|-----------------------------------------------------------------------------------------------------------------------------------------------------------------------------------|
| <b>Population</b>                                                                                                                    | Pulmonary hypertension associated with left heart disease (HFpEF, HFrEF, and valvular heart disease).                                                                             |
| <b>Intervention</b>                                                                                                                  | Pulmonary arterial hypertension approved drugs (ERA: ambrisentan, bosentan, macitentan; PDE5i: sildenafil, tadalafil; soluble guanylate cyclase (sGC): riociguat).                |
| <b>Comparison</b>                                                                                                                    | For RCTs: placebo (standard of care).<br>For registries: no active comparator.                                                                                                    |
| <b>Main outcomes</b>                                                                                                                 | Clinical events (death, hospitalization, worsening HF); exercise capacity (6MWT, CPET); haemodynamics (PVR, CO, mPAP); symptoms and quality of life; drug-induced adverse events. |

© ESC/ERS 2022

### ASSESSMENT

| <b>Problem</b>                                                                                                                                                                                                            |                                                                                                                                                                                                                                                                                                                                                                                                                                                                                                                                                                                    |                                                                                                                                                                                                                                                                                                                                                                                                                                            |
|---------------------------------------------------------------------------------------------------------------------------------------------------------------------------------------------------------------------------|------------------------------------------------------------------------------------------------------------------------------------------------------------------------------------------------------------------------------------------------------------------------------------------------------------------------------------------------------------------------------------------------------------------------------------------------------------------------------------------------------------------------------------------------------------------------------------|--------------------------------------------------------------------------------------------------------------------------------------------------------------------------------------------------------------------------------------------------------------------------------------------------------------------------------------------------------------------------------------------------------------------------------------------|
| Is the problem a priority?                                                                                                                                                                                                |                                                                                                                                                                                                                                                                                                                                                                                                                                                                                                                                                                                    |                                                                                                                                                                                                                                                                                                                                                                                                                                            |
| <b>Judgement</b>                                                                                                                                                                                                          | <b>Research evidence</b>                                                                                                                                                                                                                                                                                                                                                                                                                                                                                                                                                           | <b>Additional considerations</b>                                                                                                                                                                                                                                                                                                                                                                                                           |
| <input type="radio"/> No<br><input type="radio"/> Probably no<br><input type="radio"/> Probably yes<br><input checked="" type="checkbox"/> <b>Yes</b><br><input type="radio"/> Varies<br><input type="radio"/> Don't know | Pulmonary hypertension due to left heart disease is the most common cause of PH and is highly prevalent, especially in HF. <sup>264,265</sup><br>Across the spectrum of left heart disease, PH is associated with more symptoms, worse exercise capacity, and a dismal prognosis.                                                                                                                                                                                                                                                                                                  | NA                                                                                                                                                                                                                                                                                                                                                                                                                                         |
| <b>Desirable effects</b>                                                                                                                                                                                                  |                                                                                                                                                                                                                                                                                                                                                                                                                                                                                                                                                                                    |                                                                                                                                                                                                                                                                                                                                                                                                                                            |
| How substantial are the desirable anticipated effects?                                                                                                                                                                    |                                                                                                                                                                                                                                                                                                                                                                                                                                                                                                                                                                                    |                                                                                                                                                                                                                                                                                                                                                                                                                                            |
| <b>Judgement</b>                                                                                                                                                                                                          | <b>Research evidence</b>                                                                                                                                                                                                                                                                                                                                                                                                                                                                                                                                                           | <b>Additional considerations</b>                                                                                                                                                                                                                                                                                                                                                                                                           |
| <input checked="" type="checkbox"/> <b>Trivial</b><br><input type="radio"/> Small<br><input type="radio"/> Moderate<br><input type="radio"/> Large<br><input type="radio"/> Varies<br><input type="radio"/> Don't know    | Five of seven RCTs did not meet their primary end-point of improving haemodynamics (mPAP, PVR), exercise capacity (6MWT), or reduce the rate of clinical events. <sup>205,206,266-269</sup><br>Two small monocentric studies with sildenafil suggested a benefit in HFrEF and HFpEF. There was an improvement in exercise capacity and haemodynamics that was not confirmed in large RCTs. <sup>206,266</sup>                                                                                                                                                                      | Several meta-analysis of available RCTs concluded that there was no benefit in any of the outcomes of interest (PVR, 6MWD) and a trend to an increased rate of event in the active group. <sup>271,272</sup><br>Data from registries were conflicting and suggested that the benefit of intervention is uncertain, with a worse response in patients with PH due to LHD compared with PAH when PAH-approved drugs are used. <sup>217</sup> |
| <b>Undesirable effects</b>                                                                                                                                                                                                |                                                                                                                                                                                                                                                                                                                                                                                                                                                                                                                                                                                    |                                                                                                                                                                                                                                                                                                                                                                                                                                            |
| How substantial are the undesirable anticipated effects?                                                                                                                                                                  |                                                                                                                                                                                                                                                                                                                                                                                                                                                                                                                                                                                    |                                                                                                                                                                                                                                                                                                                                                                                                                                            |
| <b>Judgement</b>                                                                                                                                                                                                          | <b>Research evidence</b>                                                                                                                                                                                                                                                                                                                                                                                                                                                                                                                                                           | <b>Additional considerations</b>                                                                                                                                                                                                                                                                                                                                                                                                           |
| <input checked="" type="checkbox"/> <b>Large</b><br><input type="radio"/> Moderate<br><input type="radio"/> Small<br><input type="radio"/> Trivial<br><input type="radio"/> Varies<br><input type="radio"/> Don't know    | Studies with an ERA (bosentan or macitentan) led to an early adverse event of fluid retention. <sup>267-269</sup><br>A study with bosentan in HFpEF was interrupted after an interim analysis demonstrated a better response in the placebo group. <sup>269</sup><br>A study with sildenafil in patients with PH associated with valvular heart disease demonstrated that patients in the active group less frequently met the primary composite endpoint of improvement. In this trial, there was an increased rate of clinical worsening in the sildenafil group. <sup>270</sup> | One meta-analysis of available RCTs suggested a trend in the risk of clinical worsening (death, hospitalizations) in the active groups. <sup>272</sup>                                                                                                                                                                                                                                                                                     |

Continued

| Certainty of evidence                                                                                                                                                                                                                                                                                                                                                                          |                                                                                                                                                                                                                                                                                                                                                                    |                                                                                                                                                                                                                                   |
|------------------------------------------------------------------------------------------------------------------------------------------------------------------------------------------------------------------------------------------------------------------------------------------------------------------------------------------------------------------------------------------------|--------------------------------------------------------------------------------------------------------------------------------------------------------------------------------------------------------------------------------------------------------------------------------------------------------------------------------------------------------------------|-----------------------------------------------------------------------------------------------------------------------------------------------------------------------------------------------------------------------------------|
| What is the overall certainty of the evidence of effects?                                                                                                                                                                                                                                                                                                                                      |                                                                                                                                                                                                                                                                                                                                                                    |                                                                                                                                                                                                                                   |
| Judgement                                                                                                                                                                                                                                                                                                                                                                                      | Research evidence                                                                                                                                                                                                                                                                                                                                                  | Additional considerations                                                                                                                                                                                                         |
| <input type="radio"/> Very low<br><input type="radio"/> Low<br><input checked="" type="radio"/> <b>Moderate</b><br><input type="radio"/> High<br><input type="radio"/> No included studies                                                                                                                                                                                                     | The reported evidence is based on the analysis of available RCTs with the following compounds: bosentan (one study <sup>268</sup> ), macitentan (one study <sup>267</sup> ), riociguat (one study <sup>273</sup> ), and sildenafil (four studies <sup>205,206,266,270</sup> ).                                                                                     | Additional evidence is provided by open label registries, <sup>217</sup> single-centre retrospective analysis, and four meta-analyses. <sup>216,274</sup>                                                                         |
| Values                                                                                                                                                                                                                                                                                                                                                                                         |                                                                                                                                                                                                                                                                                                                                                                    |                                                                                                                                                                                                                                   |
| Is there important uncertainty about or variability in how much people value the main outcomes?                                                                                                                                                                                                                                                                                                |                                                                                                                                                                                                                                                                                                                                                                    |                                                                                                                                                                                                                                   |
| Judgement                                                                                                                                                                                                                                                                                                                                                                                      | Research evidence                                                                                                                                                                                                                                                                                                                                                  | Additional considerations                                                                                                                                                                                                         |
| <input checked="" type="checkbox"/> <b>Important uncertainty or variability</b><br><input type="radio"/> Possibly important uncertainty or variability<br><input type="radio"/> Probably no important uncertainty or variability<br><input type="radio"/> No important uncertainty or variability                                                                                              | There is a significant variability of the value of the main outcome, as most studies did not meet their primary endpoint and two were associated with a worse outcome in the active group compared with placebo. The reasons explaining this variability are numerous, including heterogeneity of the populations, different endpoints, and the study sample size. | NA                                                                                                                                                                                                                                |
| Balance of effects                                                                                                                                                                                                                                                                                                                                                                             |                                                                                                                                                                                                                                                                                                                                                                    |                                                                                                                                                                                                                                   |
| Does the balance between desirable and undesirable effects favour the intervention or the comparison?                                                                                                                                                                                                                                                                                          |                                                                                                                                                                                                                                                                                                                                                                    |                                                                                                                                                                                                                                   |
| Judgement                                                                                                                                                                                                                                                                                                                                                                                      | Research evidence                                                                                                                                                                                                                                                                                                                                                  | Additional considerations                                                                                                                                                                                                         |
| <input checked="" type="checkbox"/> <b>Favours the comparison</b><br><input type="radio"/> Probably favours the comparison<br><input type="radio"/> Does not favour either the intervention or the comparison<br><input type="radio"/> Probably favours the intervention<br><input type="radio"/> Favours the intervention<br><input type="radio"/> Varies<br><input type="radio"/> Don't know | Based on the above-mentioned analysis, the balance between the desirable and undesirable effects is in favour of the comparator (i.e. placebo on top of the standard of care for the underlying disorder).                                                                                                                                                         | NA                                                                                                                                                                                                                                |
| Resources required                                                                                                                                                                                                                                                                                                                                                                             |                                                                                                                                                                                                                                                                                                                                                                    |                                                                                                                                                                                                                                   |
| How large are the resource requirements (costs)?                                                                                                                                                                                                                                                                                                                                               |                                                                                                                                                                                                                                                                                                                                                                    |                                                                                                                                                                                                                                   |
| Judgement                                                                                                                                                                                                                                                                                                                                                                                      | Research evidence                                                                                                                                                                                                                                                                                                                                                  | Additional considerations                                                                                                                                                                                                         |
| <input type="radio"/> Large costs<br><input type="radio"/> Moderate costs<br><input type="radio"/> Negligible costs and savings<br><input type="radio"/> Moderate savings<br><input type="radio"/> Large savings<br><input type="radio"/> Varies<br><input checked="" type="checkbox"/> <b>Don't know</b>                                                                                      | There is no cost-effectiveness analysis available.                                                                                                                                                                                                                                                                                                                 | The lack of global benefit, trend to an increased risk of hospitalization, management of side effects, and cost of PAH-approved drugs are associated with a greater mobilization of resources compared with the standard of care. |
| Certainty of evidence of required resources                                                                                                                                                                                                                                                                                                                                                    |                                                                                                                                                                                                                                                                                                                                                                    |                                                                                                                                                                                                                                   |
| What is the certainty of the evidence of resource requirements (costs)?                                                                                                                                                                                                                                                                                                                        |                                                                                                                                                                                                                                                                                                                                                                    |                                                                                                                                                                                                                                   |
| Judgement                                                                                                                                                                                                                                                                                                                                                                                      | Research evidence                                                                                                                                                                                                                                                                                                                                                  | Additional considerations                                                                                                                                                                                                         |
| <input type="radio"/> Very low<br><input type="radio"/> Low<br><input type="radio"/> Moderate<br><input type="radio"/> High<br><input checked="" type="checkbox"/> <b>No included studies</b>                                                                                                                                                                                                  | See above.                                                                                                                                                                                                                                                                                                                                                         | NA                                                                                                                                                                                                                                |

Continued

| <b>Cost-effectiveness</b>                                                                                                                                                                                                                                                                                                                                                                               |                                                                                        |                                                                                                                                                                |
|---------------------------------------------------------------------------------------------------------------------------------------------------------------------------------------------------------------------------------------------------------------------------------------------------------------------------------------------------------------------------------------------------------|----------------------------------------------------------------------------------------|----------------------------------------------------------------------------------------------------------------------------------------------------------------|
| Does the cost-effectiveness of the intervention favour the intervention or the comparison?                                                                                                                                                                                                                                                                                                              |                                                                                        |                                                                                                                                                                |
| <b>Judgement</b>                                                                                                                                                                                                                                                                                                                                                                                        | <b>Research evidence</b>                                                               | <b>Additional considerations</b>                                                                                                                               |
| <input type="radio"/> Favours the comparison<br><input type="radio"/> Probably favours the comparison<br><input type="radio"/> Does not favour either the intervention or the comparison<br><input type="radio"/> Probably favours the intervention<br><input type="radio"/> Favours the intervention<br><input type="radio"/> Varies<br><input checked="" type="checkbox"/> <b>No included studies</b> | See above.                                                                             | Despite the lack of formal cost-effectiveness analysis, the balance of the use of PAH-approved therapies in this context is negative (favours the comparator). |
| <b>Equity</b>                                                                                                                                                                                                                                                                                                                                                                                           |                                                                                        |                                                                                                                                                                |
| What would be the impact on health equity?                                                                                                                                                                                                                                                                                                                                                              |                                                                                        |                                                                                                                                                                |
| <b>Judgement</b>                                                                                                                                                                                                                                                                                                                                                                                        | <b>Research evidence</b>                                                               | <b>Additional considerations</b>                                                                                                                               |
| <input type="radio"/> Reduced<br><input type="radio"/> Probably reduced<br><input type="radio"/> Probably no impact<br><input type="radio"/> Probably increased<br><input type="radio"/> Increased<br><input type="radio"/> Varies<br><input checked="" type="checkbox"/> <b>Don't know</b>                                                                                                             | See above.                                                                             | NA                                                                                                                                                             |
| <b>Acceptability</b>                                                                                                                                                                                                                                                                                                                                                                                    |                                                                                        |                                                                                                                                                                |
| Is the intervention acceptable to key stakeholders?                                                                                                                                                                                                                                                                                                                                                     |                                                                                        |                                                                                                                                                                |
| <b>Judgement</b>                                                                                                                                                                                                                                                                                                                                                                                        | <b>Research evidence</b>                                                               | <b>Additional considerations</b>                                                                                                                               |
| <input checked="" type="checkbox"/> <b>No</b><br><input type="radio"/> Probably no<br><input type="radio"/> Probably yes<br><input type="radio"/> Yes<br><input type="radio"/> Varies<br><input type="radio"/> Don't know                                                                                                                                                                               | For the reasons mentioned above, the intervention is unacceptable to key stakeholders. | NA                                                                                                                                                             |
| <b>Feasibility</b>                                                                                                                                                                                                                                                                                                                                                                                      |                                                                                        |                                                                                                                                                                |
| Is the intervention feasible to implement?                                                                                                                                                                                                                                                                                                                                                              |                                                                                        |                                                                                                                                                                |
| <b>Judgement</b>                                                                                                                                                                                                                                                                                                                                                                                        | <b>Research evidence</b>                                                               | <b>Additional considerations</b>                                                                                                                               |
| <input checked="" type="checkbox"/> <b>No</b><br><input type="radio"/> Probably no<br><input type="radio"/> Probably yes<br><input type="radio"/> Yes<br><input type="radio"/> Varies<br><input type="radio"/> Don't know                                                                                                                                                                               | At this stage of knowledge, the intervention is unfeasible.                            | NA                                                                                                                                                             |

### SUMMARY OF JUDGEMENTS

|                                                    | Judgement                                   |                                               |                                                           |                                         |                          |        |                            |
|----------------------------------------------------|---------------------------------------------|-----------------------------------------------|-----------------------------------------------------------|-----------------------------------------|--------------------------|--------|----------------------------|
| <b>Problem</b>                                     | No                                          | Probably no                                   | Probably yes                                              | <b>Yes</b>                              | NA                       | Varies | Don't know                 |
| <b>Desirable effects</b>                           | <b>Trivial</b>                              | Small                                         | Moderate                                                  | Large                                   | NA                       | Varies | Don't know                 |
| <b>Undesirable effects</b>                         | <b>Large</b>                                | Moderate                                      | Small                                                     | Trivial                                 | NA                       | Varies | Don't know                 |
| <b>Certainty of evidence</b>                       | Very low                                    | Low                                           | <b>Moderate</b>                                           | High                                    | NA                       | NA     | No included studies        |
| <b>Values</b>                                      | <b>Important uncertainty or variability</b> | Possibly important uncertainty or variability | Probably no important uncertainty or variability          | No important uncertainty or variability | NA                       | NA     | NA                         |
| <b>Balance of effects</b>                          | <b>Favours the comparison</b>               | Probably favours the comparison               | Does not favour either the intervention or the comparison | Probably favours the intervention       | Favours the intervention | Varies | Don't know                 |
| <b>Resources required</b>                          | Large costs                                 | Moderate costs                                | Negligible costs and savings                              | Moderate savings                        | Large savings            | Varies | <b>Don't know</b>          |
| <b>Certainty of evidence of required resources</b> | Very low                                    | Low                                           | Moderate                                                  | High                                    | NA                       | NA     | <b>No included studies</b> |
| <b>Cost-effectiveness</b>                          | Favours the comparison                      | Probably favours the comparison               | Does not favour either the intervention or the comparison | Probably favours the intervention       | Favours the intervention | Varies | <b>No included studies</b> |
| <b>Equity</b>                                      | Reduced                                     | Probably reduced                              | Probably no impact                                        | Probably increased                      | Increased                | Varies | <b>Don't know</b>          |
| <b>Acceptability</b>                               | <b>No</b>                                   | Probably no                                   | Probably yes                                              | Yes                                     | NA                       | Varies | Don't know                 |
| <b>Feasibility</b>                                 | <b>No</b>                                   | Probably no                                   | Probably yes                                              | Yes                                     | NA                       | Varies | Don't know                 |

© ESC/ERS 2022

### TYPE OF RECOMMENDATION

| Strong recommendation against the intervention | Conditional recommendation against the intervention | Conditional recommendation for either the intervention or the comparison | Conditional recommendation for the intervention | Strong recommendation for the intervention |
|------------------------------------------------|-----------------------------------------------------|--------------------------------------------------------------------------|-------------------------------------------------|--------------------------------------------|
| <input checked="" type="checkbox"/>            | <input type="checkbox"/>                            | <input type="checkbox"/>                                                 | <input type="checkbox"/>                        | <input type="checkbox"/>                   |

© ESC/ERS 2022

### CONCLUSIONS

|                                                                                                                                                                                                                                                                                                                                                                                       |
|---------------------------------------------------------------------------------------------------------------------------------------------------------------------------------------------------------------------------------------------------------------------------------------------------------------------------------------------------------------------------------------|
| <b>Recommendations</b>                                                                                                                                                                                                                                                                                                                                                                |
| Drugs approved for PAH are not recommended in pulmonary hypertension associated with left heart disease (class of recommendation III – level of evidence A).                                                                                                                                                                                                                          |
| <b>Justification</b>                                                                                                                                                                                                                                                                                                                                                                  |
| Analysis of the available data does not show a clear benefit of an intervention, which also appeared in the meta-analysis. In addition, serious safety concerns have been identified when ERAs were used in patients with heart failure (HFpEF and HFrEF, with or without PH) and when sildenafil was used in patients with persistent PH after correction of valvular heart disease. |
| <b>Subgroup considerations</b>                                                                                                                                                                                                                                                                                                                                                        |
| Not applicable.                                                                                                                                                                                                                                                                                                                                                                       |
| <b>Implementation considerations</b>                                                                                                                                                                                                                                                                                                                                                  |
| Not applicable.                                                                                                                                                                                                                                                                                                                                                                       |

Continued

**Monitoring and evaluation**

Not applicable.

**Research priorities**

There is no doubt that the question of treating PH associated with LHD must not be abandoned; however, several considerations must be taken into account: A better identification in disease mechanisms and pathways leading to PH associated with LHD would help to differentiate appropriate targets for research. Homogenization of the study populations and the PH phenotype should be prioritized, for example: patients with CpcPH, elevated PVR (i.e. >5 WU) with mildly elevated PAWP (i.e. 15–25 mmHg), RV dysfunction or other markers of severity would be a population of great interest. Identification of an appropriate endpoint and outcome metrics are highly desirable, specific to each stage of drug development.

© ESC/ERS 2022

**16.9. Evidence to Decision for key narrative question 6****Table S17 Evidence to Decision for key narrative question 6****QUESTION 6 (NARRATIVE)**

**Should drugs approved for pulmonary arterial hypertension be used in patients with pulmonary hypertension associated with chronic obstructive pulmonary disease? (Chosen drugs are ERAs, PDE5is, guanylate cyclase stimulators, prostacyclin derivatives, and prostacyclin receptor agonists)?**

|                             |                                                                                                                                                                                                                                  |
|-----------------------------|----------------------------------------------------------------------------------------------------------------------------------------------------------------------------------------------------------------------------------|
| <b>Population</b>           | Patients with pulmonary hypertension (PH) associated with COPD.                                                                                                                                                                  |
| <b>Intervention</b>         | Drugs approved for the treatment of pulmonary arterial hypertension (PAH) (i.e. ERAs, PDE5i, guanylate cyclase stimulators, prostacyclin derivatives, and prostacyclin receptor agonists).                                       |
| <b>Comparison</b>           | Placebo or no use of drugs approved for the treatment of pulmonary arterial hypertension (PAH).                                                                                                                                  |
| <b>Main outcomes</b>        | Survival, hospitalization, clinical worsening, exercise capacity, echocardiography, mPAP, PVR, NT-proBNP, PaO <sub>2</sub> , PaCO <sub>2</sub> , arterial oxygen saturation (SaO <sub>2</sub> ), oxygen requirement, and safety. |
| <b>Setting</b>              | Specialized PH centres.                                                                                                                                                                                                          |
| <b>Perspective</b>          | NA                                                                                                                                                                                                                               |
| <b>Background</b>           | Drugs approved for PAH are occasionally used to treat patients with PH associated with COPD, although neither the safety nor the efficacy of this approach is fully known.                                                       |
| <b>Conflict of interest</b> | NA                                                                                                                                                                                                                               |

© ESC/ERS 2022

**ASSESSMENT****Problem**

Is the problem a priority?

| <b>Judgement</b>                                                                                                                                                                                                          | <b>Research evidence</b>                                                                                                                                                                                                                                      | <b>Additional considerations</b> |
|---------------------------------------------------------------------------------------------------------------------------------------------------------------------------------------------------------------------------|---------------------------------------------------------------------------------------------------------------------------------------------------------------------------------------------------------------------------------------------------------------|----------------------------------|
| <input type="radio"/> No<br><input type="radio"/> Probably no<br><input type="radio"/> Probably yes<br><input checked="" type="checkbox"/> <b>Yes</b><br><input type="radio"/> Varies<br><input type="radio"/> Don't know | High medical need (i.e. high prevalence of PH-COPD).<br>Increased symptom burden and mortality risk with development of PH in patients with COPD.<br>Particularly high mortality risk in patients with COPD who develop severe PH (PVR >5 WU). <sup>275</sup> | NA                               |

**Desirable effects**

How substantial are the desirable anticipated effects?

| <b>Judgement</b>                                                                                                                                                                                                       | <b>Research evidence</b>                                                                                                                            | <b>Additional considerations</b>                                                                                       |
|------------------------------------------------------------------------------------------------------------------------------------------------------------------------------------------------------------------------|-----------------------------------------------------------------------------------------------------------------------------------------------------|------------------------------------------------------------------------------------------------------------------------|
| <input type="radio"/> Trivial<br><input checked="" type="checkbox"/> <b>Small</b><br><input type="radio"/> Moderate<br><input type="radio"/> Large<br><input type="radio"/> Varies<br><input type="radio"/> Don't know | Improvement in PVR by –1.4 WU after 16 weeks in a small ( $n = 28$ ) RCT with sildenafil in patients with COPD and RHC-confirmed PH. <sup>276</sup> | Insufficient data to assess effects of PAH therapies on exercise capacity, QoL, and survival in patients with PH-COPD. |

Continued



**Undesirable effects**

How substantial are the undesirable anticipated effects?

| Judgement                                                                                                                                                                                                              | Research evidence | Additional considerations                                                                         |
|------------------------------------------------------------------------------------------------------------------------------------------------------------------------------------------------------------------------|-------------------|---------------------------------------------------------------------------------------------------|
| <input type="radio"/> Large<br><input type="radio"/> Moderate<br><input type="radio"/> Small<br><input type="radio"/> Trivial<br><input type="radio"/> Varies<br><input checked="" type="checkbox"/> <b>Don't know</b> | NA                | Insufficient evidence to assess risk and side-effects of PAH medication in patients with PH-COPD. |

**Certainty of evidence**

What is the overall certainty of the evidence of effects?

| Judgement                                                                                                                                                                                     | Research evidence                                                         | Additional considerations                                                                                                                                                            |
|-----------------------------------------------------------------------------------------------------------------------------------------------------------------------------------------------|---------------------------------------------------------------------------|--------------------------------------------------------------------------------------------------------------------------------------------------------------------------------------|
| <input checked="" type="checkbox"/> <b>Very low</b><br><input type="radio"/> Low<br><input type="radio"/> Moderate<br><input type="radio"/> High<br><input type="radio"/> No included studies | Very few RCTs, a small number of patients, and short observation periods. | Additional signals from registries raising the possibility of clinical improvements and better survival in patients with COPD and severe PH, yet unconfirmed by RCTs. <sup>277</sup> |

**Values**

Is there important uncertainty about or variability in how much people value the main outcomes?

| Judgement                                                                                                                                                                                                                                                                                         | Research evidence                                                                                                                               | Additional considerations |
|---------------------------------------------------------------------------------------------------------------------------------------------------------------------------------------------------------------------------------------------------------------------------------------------------|-------------------------------------------------------------------------------------------------------------------------------------------------|---------------------------|
| <input checked="" type="checkbox"/> <b>Important uncertainty or variability</b><br><input type="radio"/> Possibly important uncertainty or variability<br><input type="radio"/> Probably no important uncertainty or variability<br><input type="radio"/> No important uncertainty or variability | Patients with COPD and RHC-documented PH may benefit more from treatment from PAH drugs than those in whom PH is suspected by echocardiography. | NA                        |

**Balance of effects**

Does the balance between desirable and undesirable effects favour the intervention or the comparison?

| Judgement                                                                                                                                                                                                                                                                                                                                                                                      | Research evidence              | Additional considerations |
|------------------------------------------------------------------------------------------------------------------------------------------------------------------------------------------------------------------------------------------------------------------------------------------------------------------------------------------------------------------------------------------------|--------------------------------|---------------------------|
| <input type="radio"/> Favours the comparison<br><input type="radio"/> Probably favours the comparison<br><input type="radio"/> Does not favour either the intervention or the comparison<br><input type="radio"/> Probably favours the intervention<br><input type="radio"/> Favours the intervention<br><input type="radio"/> Varies<br><input checked="" type="checkbox"/> <b>Don't know</b> | Balance of effects is unknown. | NA                        |

**Acceptability**

Is the intervention acceptable to key stakeholders?

| Judgement                                                                                                                                                                                                                 | Research evidence                                                                                                                                                                                  | Additional considerations |
|---------------------------------------------------------------------------------------------------------------------------------------------------------------------------------------------------------------------------|----------------------------------------------------------------------------------------------------------------------------------------------------------------------------------------------------|---------------------------|
| <input type="radio"/> No<br><input type="radio"/> Probably no<br><input type="radio"/> Probably yes<br><input type="radio"/> Yes<br><input checked="" type="checkbox"/> <b>Varies</b><br><input type="radio"/> Don't know | Registry data suggest that physicians use PAH medication in selected patients with COPD and PH, mostly in those with severe PH.<br>No approval and no reimbursement of PAH medication for PH-COPD. | NA                        |

Continued

| <b>Feasibility</b>                                                                                                                                                                                                        |                   |                           |
|---------------------------------------------------------------------------------------------------------------------------------------------------------------------------------------------------------------------------|-------------------|---------------------------|
| Is the intervention feasible to implement?                                                                                                                                                                                |                   |                           |
| Judgement                                                                                                                                                                                                                 | Research evidence | Additional considerations |
| <input type="radio"/> No<br><input type="radio"/> Probably no<br><input type="radio"/> Probably yes<br><input checked="" type="checkbox"/> <b>Yes</b><br><input type="radio"/> Varies<br><input type="radio"/> Don't know | NA                | NA                        |

© ESC/ERS 2022

**SUMMARY OF JUDGEMENTS**

|                              | Judgement                                   |                                               |                                                           |                                         |                          |        |                     |
|------------------------------|---------------------------------------------|-----------------------------------------------|-----------------------------------------------------------|-----------------------------------------|--------------------------|--------|---------------------|
| <b>Problem</b>               | No                                          | Probably no                                   | Probably yes                                              | <b>Yes</b>                              | NA                       | Varies | Don't know          |
| <b>Desirable effects</b>     | Trivial                                     | <b>Small</b>                                  | Moderate                                                  | Large                                   | NA                       | Varies | Don't know          |
| <b>Undesirable effects</b>   | Large                                       | Moderate                                      | Small                                                     | Trivial                                 | NA                       | Varies | <b>Don't know</b>   |
| <b>Certainty of evidence</b> | <b>Very low</b>                             | Low                                           | Moderate                                                  | High                                    | NA                       | NA     | No included studies |
| <b>Values</b>                | <b>Important uncertainty or variability</b> | Possibly important uncertainty or variability | Probably no important uncertainty or variability          | No important uncertainty or variability | NA                       | NA     | NA                  |
| <b>Balance of effects</b>    | Favours the comparison                      | Probably favours the comparison               | Does not favour either the intervention or the comparison | Probably favours the intervention       | Favours the intervention | Varies | <b>Don't know</b>   |
| <b>Acceptability</b>         | No                                          | Probably no                                   | Probably yes                                              | Yes                                     | NA                       | Varies | <b>Don't know</b>   |
| <b>Feasibility</b>           | No                                          | Probably no                                   | Probably yes                                              | <b>Yes</b>                              | NA                       | Varies | Don't know          |

© ESC/ERS 2022

**TYPE OF RECOMMENDATION**

|                                                |                                                     |                                                                          |                                                 |                                            |
|------------------------------------------------|-----------------------------------------------------|--------------------------------------------------------------------------|-------------------------------------------------|--------------------------------------------|
| Strong recommendation against the intervention | Conditional recommendation against the intervention | Conditional recommendation for either the intervention or the comparison | Conditional recommendation for the intervention | Strong recommendation for the intervention |
| <input type="radio"/>                          | <input type="radio"/>                               | <input checked="" type="checkbox"/>                                      | <input type="radio"/>                           | <input type="radio"/>                      |

© ESC/ERS 2022

**CONCLUSIONS**

|                                                                                                                                                                                                                             |
|-----------------------------------------------------------------------------------------------------------------------------------------------------------------------------------------------------------------------------|
| <b>Recommendations</b>                                                                                                                                                                                                      |
| The use of medication approved for PAH is not recommended in patients with COPD and PH.                                                                                                                                     |
| <b>Justification</b>                                                                                                                                                                                                        |
| There is insufficient evidence to support the use of medication approved for PAH to be recommended in patients with COPD and PH. Safety, tolerability, and efficacy of PAH medication in patients with PH-COPD are unknown. |
| <b>Subgroup considerations</b>                                                                                                                                                                                              |
| Registry data raise the possibility that selected patients with COPD and severe PH (PVR >5 WU) may benefit from medication targeting PH, but this has not yet been confirmed by prospective clinical trials.                |
| <b>Implementation considerations</b>                                                                                                                                                                                        |
| Implementation of treatment would be feasible, provided that solid data support safety and efficacy.                                                                                                                        |

Continued

|                                                                                                                                                                                                                                                                                                                                 |
|---------------------------------------------------------------------------------------------------------------------------------------------------------------------------------------------------------------------------------------------------------------------------------------------------------------------------------|
| <b>Monitoring and evaluation</b>                                                                                                                                                                                                                                                                                                |
| See research priorities below.                                                                                                                                                                                                                                                                                                  |
| <b>Research priorities</b>                                                                                                                                                                                                                                                                                                      |
| 1) Evaluation of the safety, tolerability, and efficacy of PAH medication in patients with COPD and severe PH, as defined by PVR >5 WU.<br>2) In a stepwise approach, PAH medication that proves to be safe and efficacious in patients with COPD and severe COPD should be evaluated in patients with COPD and less severe PH. |

© ESC/ERS 2022

## 16.10. Evidence to Decision for key narrative question 7

**Table S18 Evidence to Decision for key narrative question 7**

### QUESTION 7 (NARRATIVE)

| <b>Should drugs approved for pulmonary arterial hypertension be used in patients with pulmonary hypertension associated with interstitial lung diseases? (Chosen drugs are ERAs, guanylate cyclase stimulators, prostacyclin derivatives, and prostacyclin receptor agonists)?</b> |                                                                                                                                                                                                           |
|------------------------------------------------------------------------------------------------------------------------------------------------------------------------------------------------------------------------------------------------------------------------------------|-----------------------------------------------------------------------------------------------------------------------------------------------------------------------------------------------------------|
| <b>Population</b>                                                                                                                                                                                                                                                                  | Patients with pulmonary hypertension (PH) associated with ILD; ILD restricted to the most common idiopathic interstitial pneumonias (IIPs) (i.e. IPF and fibrotic non-specific interstitial pneumonitis). |
| <b>Intervention</b>                                                                                                                                                                                                                                                                | Drugs approved for the treatment of pulmonary arterial hypertension (PAH) (i.e. ERAs, PDE5is, guanylate cyclase stimulators, prostacyclin derivatives, and prostacyclin receptor agonists).               |
| <b>Comparison</b>                                                                                                                                                                                                                                                                  | Placebo or no use of drugs approved for the treatment of pulmonary arterial hypertension (PAH).                                                                                                           |
| <b>Main outcomes</b>                                                                                                                                                                                                                                                               | Survival, hospitalization, clinical worsening, exercise capacity, echocardiography, mPAP, PVR, NT-proBNP, PaO <sub>2</sub> , PaCO <sub>2</sub> , SaO <sub>2</sub> , oxygen requirement, and safety.       |
| <b>Setting</b>                                                                                                                                                                                                                                                                     | Specialized pulmonary hypertension centres.                                                                                                                                                               |
| <b>Perspective</b>                                                                                                                                                                                                                                                                 | NA                                                                                                                                                                                                        |
| <b>Background</b>                                                                                                                                                                                                                                                                  | Drugs approved for PAH are occasionally used to treat patients with PH associated with ILD, although neither the safety nor the efficacy of this approach is fully known.                                 |
| <b>Conflict of interest</b>                                                                                                                                                                                                                                                        | NA                                                                                                                                                                                                        |

© ESC/ERS 2022

### ASSESSMENT

| <b>Problem</b>                                                                                                                                                                                                            |                                                                                                                                                                                                                                                                         |                                                                                        |
|---------------------------------------------------------------------------------------------------------------------------------------------------------------------------------------------------------------------------|-------------------------------------------------------------------------------------------------------------------------------------------------------------------------------------------------------------------------------------------------------------------------|----------------------------------------------------------------------------------------|
| Is the problem a priority?                                                                                                                                                                                                |                                                                                                                                                                                                                                                                         |                                                                                        |
| <b>Judgement</b>                                                                                                                                                                                                          | <b>Research evidence</b>                                                                                                                                                                                                                                                | <b>Additional considerations</b>                                                       |
| <input type="radio"/> No<br><input type="radio"/> Probably no<br><input type="radio"/> Probably yes<br><input checked="" type="checkbox"/> <b>Yes</b><br><input type="radio"/> Varies<br><input type="radio"/> Don't know | High medical need (i.e. high prevalence of PH in patients with ILD).<br>Increased symptom burden and mortality risk with development of PH in patients with ILD.<br>Particularly high mortality risk in patients with ILD who develop severe PH (PVR >5 WU).            | NA                                                                                     |
| <b>Desirable effects</b>                                                                                                                                                                                                  |                                                                                                                                                                                                                                                                         |                                                                                        |
| How substantial are the desirable anticipated effects?                                                                                                                                                                    |                                                                                                                                                                                                                                                                         |                                                                                        |
| <b>Judgement</b>                                                                                                                                                                                                          | <b>Research evidence</b>                                                                                                                                                                                                                                                | <b>Additional considerations</b>                                                       |
| <input type="radio"/> Trivial<br><input type="radio"/> Small<br><input checked="" type="checkbox"/> <b>Moderate</b><br><input type="radio"/> Large<br><input type="radio"/> Varies<br><input type="radio"/> Don't know    | Placebo-corrected improvement in 6MWD by 31 m and lower incidence of clinical worsening events after 16 weeks of treatment with inhaled treprostinil. <sup>278</sup><br>There is insufficient evidence on safety and efficacy of ERA and PDE5i in patients with PH-ILD. | Effects of inhaled treprostinil on long-term outcomes in patients with PH-ILD unknown. |

Continued

| <b>Undesirable effects</b>                                                                                                                                                                                                                                                                                                                                                                     |                                                                                                                                                                                                                                                                                                         |                                                                                                  |
|------------------------------------------------------------------------------------------------------------------------------------------------------------------------------------------------------------------------------------------------------------------------------------------------------------------------------------------------------------------------------------------------|---------------------------------------------------------------------------------------------------------------------------------------------------------------------------------------------------------------------------------------------------------------------------------------------------------|--------------------------------------------------------------------------------------------------|
| How substantial are the undesirable anticipated effects?                                                                                                                                                                                                                                                                                                                                       |                                                                                                                                                                                                                                                                                                         |                                                                                                  |
| <b>Judgement</b>                                                                                                                                                                                                                                                                                                                                                                               | <b>Research evidence</b>                                                                                                                                                                                                                                                                                | <b>Additional considerations</b>                                                                 |
| <input type="radio"/> Large<br><input type="radio"/> Moderate<br><input type="radio"/> Small<br><input type="radio"/> Trivial<br><input checked="" type="checkbox"/> <b>Varies</b><br><input type="radio"/> Don't know                                                                                                                                                                         | In the abovementioned study, 16 weeks of therapy with inhaled treprostinil was not associated with more adverse events or drug discontinuations due to adverse events than placebo.<br>In patients with IIP and PH, there was a signal of increased mortality with the use of riociguat. <sup>220</sup> | Insufficient evidence to assess risk and side effects of PAH medication in patients with PH-ILD. |
| <b>Certainty of evidence</b>                                                                                                                                                                                                                                                                                                                                                                   |                                                                                                                                                                                                                                                                                                         |                                                                                                  |
| What is the overall certainty of the evidence of effects?                                                                                                                                                                                                                                                                                                                                      |                                                                                                                                                                                                                                                                                                         |                                                                                                  |
| <b>Judgement</b>                                                                                                                                                                                                                                                                                                                                                                               | <b>Research evidence</b>                                                                                                                                                                                                                                                                                | <b>Additional considerations</b>                                                                 |
| <input type="radio"/> Very low<br><input checked="" type="checkbox"/> <b>Low</b><br><input type="radio"/> Moderate<br><input type="radio"/> High<br><input type="radio"/> No included studies                                                                                                                                                                                                  | Single, short-term trial with inhaled treprostinil in patients with PH-ILD. <sup>278</sup><br>Mortality signal with riociguat in patients with IIP-PH not statistically significant. <sup>220</sup><br>Insufficient evidence for ERA and PDE5i in patients with IL-D-PH.                                | NA                                                                                               |
| <b>Values</b>                                                                                                                                                                                                                                                                                                                                                                                  |                                                                                                                                                                                                                                                                                                         |                                                                                                  |
| Is there important uncertainty about or variability in how much people value the main outcomes?                                                                                                                                                                                                                                                                                                |                                                                                                                                                                                                                                                                                                         |                                                                                                  |
| <b>Judgement</b>                                                                                                                                                                                                                                                                                                                                                                               | <b>Research evidence</b>                                                                                                                                                                                                                                                                                | <b>Additional considerations</b>                                                                 |
| <input checked="" type="checkbox"/> <b>Important uncertainty or variability</b><br><input type="radio"/> Possibly important uncertainty or variability<br><input type="radio"/> Probably no important uncertainty or variability<br><input type="radio"/> No important uncertainty or variability                                                                                              | The clinical benefit (PROs, QoL, survival) of any PAH drugs in patients with PH-ILD is unknown.                                                                                                                                                                                                         | NA                                                                                               |
| <b>Balance of effects</b>                                                                                                                                                                                                                                                                                                                                                                      |                                                                                                                                                                                                                                                                                                         |                                                                                                  |
| Does the balance between desirable and undesirable effects favour the intervention or the comparison?                                                                                                                                                                                                                                                                                          |                                                                                                                                                                                                                                                                                                         |                                                                                                  |
| <b>Judgement</b>                                                                                                                                                                                                                                                                                                                                                                               | <b>Research evidence</b>                                                                                                                                                                                                                                                                                | <b>Additional considerations</b>                                                                 |
| <input type="radio"/> Favours the comparison<br><input type="radio"/> Probably favours the comparison<br><input type="radio"/> Does not favour either the intervention or the comparison<br><input type="radio"/> Probably favours the intervention<br><input type="radio"/> Favours the intervention<br><input checked="" type="checkbox"/> <b>Varies</b><br><input type="radio"/> Don't know | Given the available evidence, inhaled treprostinil may have favourable effects in patients with PH-ILD.<br>For riociguat in patients with PH-ILD, the available evidence favours the comparison (placebo).<br>For all other PAH drugs, the balance of effects in patients with PH-ILD is unknown        | NA                                                                                               |
| <b>Acceptability</b>                                                                                                                                                                                                                                                                                                                                                                           |                                                                                                                                                                                                                                                                                                         |                                                                                                  |
| Is the intervention acceptable to key stakeholders?                                                                                                                                                                                                                                                                                                                                            |                                                                                                                                                                                                                                                                                                         |                                                                                                  |
| <b>Judgement</b>                                                                                                                                                                                                                                                                                                                                                                               | <b>Research evidence</b>                                                                                                                                                                                                                                                                                | <b>Additional considerations</b>                                                                 |
| <input type="radio"/> No<br><input type="radio"/> Probably no<br><input type="radio"/> Probably yes<br><input type="radio"/> Yes<br><input checked="" type="checkbox"/> <b>Varies</b><br><input type="radio"/> Don't know                                                                                                                                                                      | Registry data suggest that physicians use PAH drugs in selected patients with IL-D and PH, mostly in those with severe PH.<br>No approval and no reimbursement of PAH medication for PH-ILD.                                                                                                            | NA                                                                                               |

Continued

| <b>Feasibility</b><br>Is the intervention feasible to implement?                                                                                                                                                          |                   |                           |
|---------------------------------------------------------------------------------------------------------------------------------------------------------------------------------------------------------------------------|-------------------|---------------------------|
| Judgement                                                                                                                                                                                                                 | Research evidence | Additional considerations |
| <input type="radio"/> No<br><input type="radio"/> Probably no<br><input type="radio"/> Probably yes<br><input checked="" type="checkbox"/> <b>Yes</b><br><input type="radio"/> Varies<br><input type="radio"/> Don't know | NA                | NA                        |

© ESC/ERS 2022

### SUMMARY OF JUDGEMENTS

|                              | Judgement                                   |                                               |                                                           |                                         |                          |               |                     |
|------------------------------|---------------------------------------------|-----------------------------------------------|-----------------------------------------------------------|-----------------------------------------|--------------------------|---------------|---------------------|
| <b>Problem</b>               | No                                          | Probably no                                   | Probably yes                                              | <b>Yes</b>                              | NA                       | Varies        | Don't know          |
| <b>Desirable effects</b>     | Trivial                                     | Small                                         | <b>Moderate</b>                                           | Large                                   | NA                       | Varies        | Don't know          |
| <b>Undesirable effects</b>   | Large                                       | Moderate                                      | Small                                                     | Trivial                                 | NA                       | <b>Varies</b> | Don't know          |
| <b>Certainty of evidence</b> | Very low                                    | <b>Low</b>                                    | Moderate                                                  | High                                    | NA                       | NA            | No included studies |
| <b>Values</b>                | <b>Important uncertainty or variability</b> | Possibly important uncertainty or variability | Probably no important uncertainty or variability          | No important uncertainty or variability | NA                       | NA            | NA                  |
| <b>Balance of effects</b>    | Favours the comparison                      | Probably favours the comparison               | Does not favour either the intervention or the comparison | Probably favours the intervention       | Favours the intervention | <b>Varies</b> | Don't know          |
| <b>Acceptability</b>         | No                                          | Probably no                                   | Probably yes                                              | Yes                                     | NA                       | <b>Varies</b> | Don't know          |
| <b>Feasibility</b>           | No                                          | Probably no                                   | Probably yes                                              | <b>Yes</b>                              | NA                       | Varies        | Don't know          |

© ESC/ERS 2022

### TYPE OF RECOMMENDATION

|                                                |                                                     |                                                                          |                                                 |                                            |
|------------------------------------------------|-----------------------------------------------------|--------------------------------------------------------------------------|-------------------------------------------------|--------------------------------------------|
| Strong recommendation against the intervention | Conditional recommendation against the intervention | Conditional recommendation for either the intervention or the comparison | Conditional recommendation for the intervention | Strong recommendation for the intervention |
| <input type="radio"/>                          | <input type="radio"/>                               | <input checked="" type="checkbox"/>                                      | <input type="radio"/>                           | <input type="radio"/>                      |

© ESC/ERS 2022

### CONCLUSIONS

|                                                                                                                                                                                                                                                                                                                    |
|--------------------------------------------------------------------------------------------------------------------------------------------------------------------------------------------------------------------------------------------------------------------------------------------------------------------|
| <b>Recommendations</b>                                                                                                                                                                                                                                                                                             |
| Inhaled treprostinil may be considered in patients with ILD who have PH documented by RHC. Riociguat is not recommended for patients with PH-ILD, as this intervention may be associated with increased mortality. Other PAH drugs are not recommended in patients with PH-ILD due to lack of supportive evidence. |
| <b>Justification</b>                                                                                                                                                                                                                                                                                               |
| As above.                                                                                                                                                                                                                                                                                                          |
| <b>Subgroup considerations</b>                                                                                                                                                                                                                                                                                     |
| Registry data raise the possibility that selected patients with ILD and severe PH (PVR >5 WU) have a particularly high mortality risk and may benefit from medication targeting PH, but this has not yet been confirmed by prospective clinical trials.                                                            |
| <b>Implementation considerations</b>                                                                                                                                                                                                                                                                               |
| Implementation of treatment would be feasible, provided that solid data support safety and efficacy.                                                                                                                                                                                                               |

Continued

**Monitoring and evaluation**

See research priorities below.

**Research priorities**

- 1) Studies investigating the use of PAH medication in patients with PH-ILD need to ensure proper phenotyping of patients; this includes RHC at enrolment.
- 2) Evaluation of the safety, tolerability, and efficacy of PAH medication in patients with ILD and severe PH, as defined by a PVR >5 WU.
- 3) In a stepwise approach, PAH medication that proves to be safe and efficacious in patients with ILD and severe COPD should be evaluated in patients with ILD and less severe PH.

© ESC/ERS 2022

**16.11. Evidence to Decision for key narrative question 8****Table S19 Evidence to Decision for key narrative question 8****QUESTION 8 (NARRATIVE)****Should balloon pulmonary angioplasty or medical therapy be used in patients with inoperable chronic thrombo-embolic pulmonary hypertension?**

|                              |                                                                                                     |
|------------------------------|-----------------------------------------------------------------------------------------------------|
| <b>Population</b>            | Patients with inoperable chronic thrombo-embolic pulmonary hypertension.                            |
| <b>Intervention</b>          | Balloon pulmonary angioplasty or medical therapy.                                                   |
| <b>Comparison</b>            | NA                                                                                                  |
| <b>Main outcomes</b>         | Improvement in pulmonary haemodynamics, functional status, exercise tolerance, biomarkers, and QoL. |
| <b>Setting</b>               | NA                                                                                                  |
| <b>Perspective</b>           | NA                                                                                                  |
| <b>Background</b>            | NA                                                                                                  |
| <b>Conflict of interests</b> | NA                                                                                                  |

© ESC/ERS 2022

**ASSESSMENT****Problem**

Is the problem a priority?

| <b>Judgement</b>                                                                                                                                                                                                          | <b>Research evidence</b> | <b>Additional considerations</b> |
|---------------------------------------------------------------------------------------------------------------------------------------------------------------------------------------------------------------------------|--------------------------|----------------------------------|
| <input type="radio"/> No<br><input type="radio"/> Probably no<br><input type="radio"/> Probably yes<br><input checked="" type="checkbox"/> <b>Yes</b><br><input type="radio"/> Varies<br><input type="radio"/> Don't know | NA                       | NA                               |

**Desirable effects**

How substantial are the desirable anticipated effects?

| <b>Judgement</b>                                                                                                                                                                                                       | <b>Research evidence</b>                                              | <b>Additional considerations</b> |
|------------------------------------------------------------------------------------------------------------------------------------------------------------------------------------------------------------------------|-----------------------------------------------------------------------|----------------------------------|
| <input type="radio"/> Trivial<br><input type="radio"/> Small<br><input type="radio"/> Moderate<br><input type="radio"/> Large<br><input checked="" type="checkbox"/> <b>Varies</b><br><input type="radio"/> Don't know | Improved pulmonary haemodynamics, exercise tolerance, and biomarkers. | NA                               |

**Undesirable effects**

How substantial are the undesirable anticipated effects?

| <b>Judgement</b>                                                                   | <b>Research evidence</b>                                                                                                                                                       | <b>Additional considerations</b> |
|------------------------------------------------------------------------------------|--------------------------------------------------------------------------------------------------------------------------------------------------------------------------------|----------------------------------|
| <input type="radio"/> Large<br><input checked="" type="checkbox"/> <b>Moderate</b> | Specifically for BPA, <sup>279</sup> due to periprocedural complications (BPA complication rate is reduced when patients are pre-treated with medical therapy). <sup>209</sup> | NA                               |

Continued

|                                                                                                                                                                                                                                                                                                                                                                                                                 |                                                                                                                                                                                                                                                                                                                                                                                              |                                                                                                                                    |
|-----------------------------------------------------------------------------------------------------------------------------------------------------------------------------------------------------------------------------------------------------------------------------------------------------------------------------------------------------------------------------------------------------------------|----------------------------------------------------------------------------------------------------------------------------------------------------------------------------------------------------------------------------------------------------------------------------------------------------------------------------------------------------------------------------------------------|------------------------------------------------------------------------------------------------------------------------------------|
| <input type="radio"/> Small<br><input type="radio"/> Trivial<br><input type="radio"/> Varies<br><input type="radio"/> Don't know                                                                                                                                                                                                                                                                                |                                                                                                                                                                                                                                                                                                                                                                                              |                                                                                                                                    |
| <b>Certainty of evidence</b><br>What is the overall certainty of the evidence of effects?                                                                                                                                                                                                                                                                                                                       |                                                                                                                                                                                                                                                                                                                                                                                              |                                                                                                                                    |
| <b>Judgement</b><br><input type="radio"/> Very low<br><input type="radio"/> Low<br><input checked="" type="radio"/> <b>Moderate</b><br><input type="radio"/> High<br><input type="radio"/> No included studies                                                                                                                                                                                                  | <b>Research evidence</b><br>Single and multicenter studies for BPA, <sup>280–288</sup> three positive RCTs for medical treatment. <sup>289–291</sup>                                                                                                                                                                                                                                         | <b>Additional considerations</b><br>See Recommendation Table 23.                                                                   |
| <b>Values</b><br>Is there important uncertainty about or variability in how much people value the main outcomes?                                                                                                                                                                                                                                                                                                |                                                                                                                                                                                                                                                                                                                                                                                              |                                                                                                                                    |
| <b>Judgement</b><br><input type="radio"/> Important uncertainty or variability<br><input type="radio"/> Possibly important uncertainty or variability<br><input checked="" type="radio"/> <b>Probably no important uncertainty or variability</b><br><input type="radio"/> No important uncertainty or variability                                                                                              | <b>Research evidence</b><br>BPA-followed medical therapy improves patient haemodynamics, exercise tolerance, and QoL. Data on long-term outcomes are limited but suggestive of improved survival. <sup>280–288</sup> Medical therapy without BPA is improving pulmonary haemodynamics, exercise tolerance, and QoL. <sup>289–291</sup> Long-term data show improved survival. <sup>292</sup> | <b>Additional considerations</b><br>NA                                                                                             |
| <b>Balance of effects</b><br>Does the balance between desirable and undesirable effects favour the intervention or the comparison?                                                                                                                                                                                                                                                                              |                                                                                                                                                                                                                                                                                                                                                                                              |                                                                                                                                    |
| <b>Judgement</b><br><input type="radio"/> Favours the comparison<br><input type="radio"/> Probably favours the comparison<br><input type="radio"/> Does not favour either the intervention or the comparison<br><input type="radio"/> Probably favours the intervention<br><input checked="" type="radio"/> <b>Favours the intervention</b><br><input type="radio"/> Varies<br><input type="radio"/> Don't know | <b>Research evidence</b><br>Most studies describe benefits with limited complications (BPA) or drug side effects (medical therapy).                                                                                                                                                                                                                                                          | <b>Additional considerations</b><br>NA                                                                                             |
| <b>Resources required</b><br>How large are the resource requirements (costs)?                                                                                                                                                                                                                                                                                                                                   |                                                                                                                                                                                                                                                                                                                                                                                              |                                                                                                                                    |
| <b>Judgement</b><br><input checked="" type="checkbox"/> <b>Large costs</b><br><input type="radio"/> Moderate costs<br><input type="radio"/> Negligible costs and savings<br><input type="radio"/> Moderate savings<br><input type="radio"/> Large savings<br><input type="radio"/> Varies<br><input type="radio"/> Don't know                                                                                   | <b>Research evidence</b><br>NA                                                                                                                                                                                                                                                                                                                                                               | <b>Additional considerations</b><br>Drugs are expensive and BPA procedures require hospital stay (costs dependent on the country). |

Continued

**Certainty of evidence of required resources**

What is the certainty of the evidence of resource requirements (costs)?

| Judgement                                                                                                                                                                                     | Research evidence | Additional considerations                                                                                                   |
|-----------------------------------------------------------------------------------------------------------------------------------------------------------------------------------------------|-------------------|-----------------------------------------------------------------------------------------------------------------------------|
| <input type="radio"/> Very low<br><input type="radio"/> Low<br><input type="radio"/> Moderate<br><input type="radio"/> High<br><input checked="" type="checkbox"/> <b>No included studies</b> | NA                | No economical studies were performed, but Task Force member experience suggests overall benefits of BPA or medical therapy. |

**Cost-effectiveness**

Does the cost-effectiveness of the intervention favour the intervention or the comparison?

| Judgement                                                                                                                                                                                                                                                                                                                                                                                               | Research evidence | Additional considerations |
|---------------------------------------------------------------------------------------------------------------------------------------------------------------------------------------------------------------------------------------------------------------------------------------------------------------------------------------------------------------------------------------------------------|-------------------|---------------------------|
| <input type="radio"/> Favours the comparison<br><input type="radio"/> Probably favours the comparison<br><input type="radio"/> Does not favour either the intervention or the comparison<br><input type="radio"/> Probably favours the intervention<br><input type="radio"/> Favours the intervention<br><input type="radio"/> Varies<br><input checked="" type="checkbox"/> <b>No included studies</b> | No evidence.      | NA                        |

**Equity**

What would be the impact on health equity?

| Judgement                                                                                                                                                                                                                                                                                   | Research evidence | Additional considerations                                              |
|---------------------------------------------------------------------------------------------------------------------------------------------------------------------------------------------------------------------------------------------------------------------------------------------|-------------------|------------------------------------------------------------------------|
| <input type="radio"/> Reduced<br><input checked="" type="checkbox"/> <b>Probably reduced</b><br><input type="radio"/> Probably no impact<br><input type="radio"/> Probably increased<br><input type="radio"/> Increased<br><input type="radio"/> Varies<br><input type="radio"/> Don't know | NA                | BPA can be provided in countries where medical therapy is unavailable. |

**Acceptability**

Is the intervention acceptable to key stakeholders?

| Judgement                                                                                                                                                                                                                 | Research evidence                                              | Additional considerations |
|---------------------------------------------------------------------------------------------------------------------------------------------------------------------------------------------------------------------------|----------------------------------------------------------------|---------------------------|
| <input type="radio"/> No<br><input type="radio"/> Probably no<br><input checked="" type="checkbox"/> <b>Probably yes</b><br><input type="radio"/> Yes<br><input type="radio"/> Varies<br><input type="radio"/> Don't know | Improving haemodynamics, exercise capacity, QoL, and survival. | NA                        |

**Feasibility**

Is the intervention feasible to implement?

| Judgement                                                                                                                                                                                                                 | Research evidence | Additional considerations      |
|---------------------------------------------------------------------------------------------------------------------------------------------------------------------------------------------------------------------------|-------------------|--------------------------------|
| <input type="radio"/> No<br><input type="radio"/> Probably no<br><input type="radio"/> Probably yes<br><input checked="" type="checkbox"/> <b>Yes</b><br><input type="radio"/> Varies<br><input type="radio"/> Don't know | NA                | Only for expert CTEPH centres. |



**SUMMARY OF JUDGEMENTS**

|                                                    | Judgement                            |                                               |                                                           |                                         |                                 |               |                            |
|----------------------------------------------------|--------------------------------------|-----------------------------------------------|-----------------------------------------------------------|-----------------------------------------|---------------------------------|---------------|----------------------------|
| <b>Problem</b>                                     | No                                   | Probably no                                   | Probably yes                                              | <b>Yes</b>                              | NA                              | Varies        | Don't know                 |
| <b>Desirable effects</b>                           | Trivial                              | Small                                         | Moderate                                                  | Large                                   | NA                              | <b>Varies</b> | Don't know                 |
| <b>Undesirable effects</b>                         | Large                                | <b>Moderate</b>                               | Small                                                     | Trivial                                 | NA                              | Varies        | Don't know                 |
| <b>Certainty of evidence</b>                       | Very low                             | Low                                           | <b>Moderate</b>                                           | High                                    | NA                              | NA            | No included studies        |
| <b>Values</b>                                      | Important uncertainty or variability | Possibly important uncertainty or variability | <b>Probably no important uncertainty or variability</b>   | No important uncertainty or variability | NA                              | NA            | NA                         |
| <b>Balance of effects</b>                          | Favours the comparison               | Probably favours the comparison               | Does not favour either the intervention or the comparison | Probably favours the intervention       | <b>Favours the intervention</b> | Varies        | Don't know                 |
| <b>Resources required</b>                          | <b>Large costs</b>                   | Moderate costs                                | Negligible costs and savings                              | Moderate savings                        | Large savings                   | Varies        | Don't know                 |
| <b>Certainty of evidence of required resources</b> | Very low                             | Low                                           | Moderate                                                  | High                                    | NA                              | NA            | <b>No included studies</b> |
| <b>Cost-effectiveness</b>                          | Favours the comparison               | Probably favours the comparison               | Does not favour either the intervention or the comparison | Probably favours the intervention       | Favours the intervention        | Varies        | <b>No included studies</b> |
| <b>Equity</b>                                      | Reduced                              | <b>Probably reduced</b>                       | Probably no impact                                        | Probably increased                      | Increased                       | Varies        | Don't know                 |
| <b>Acceptability</b>                               | No                                   | Probably no                                   | Probably yes                                              | <b>Yes</b>                              | NA                              | Varies        | Don't know                 |
| <b>Feasibility</b>                                 | No                                   | Probably no                                   | <b>Probably yes</b>                                       | Yes                                     | NA                              | Varies        | Don't know                 |

© ESC/ERS 2022

**TYPE OF RECOMMENDATION**

|                                                |                                                     |                                                                          |                                                 |                                            |
|------------------------------------------------|-----------------------------------------------------|--------------------------------------------------------------------------|-------------------------------------------------|--------------------------------------------|
| Strong recommendation against the intervention | Conditional recommendation against the intervention | Conditional recommendation for either the intervention or the comparison | Conditional recommendation for the intervention | Strong recommendation for the intervention |
| <input type="radio"/>                          | <input type="radio"/>                               | <input type="radio"/>                                                    | <input type="radio"/>                           | <input checked="" type="checkbox"/>        |

© ESC/ERS 2022

**CONCLUSIONS**

|                                                                                                                                                                                                                                                                                                                                                                                                                                                                                                                                                                                                                                                                                                         |
|---------------------------------------------------------------------------------------------------------------------------------------------------------------------------------------------------------------------------------------------------------------------------------------------------------------------------------------------------------------------------------------------------------------------------------------------------------------------------------------------------------------------------------------------------------------------------------------------------------------------------------------------------------------------------------------------------------|
| <b>Recommendation</b>                                                                                                                                                                                                                                                                                                                                                                                                                                                                                                                                                                                                                                                                                   |
| Interventional BPA is recommended in patients who are technically inoperable or have proximal disease but carry an unfavourable risk:benefit ratio for pulmonary endarterectomy provided distal obstructions amenable to BPA are present.<br>Riociguat is recommended for symptomatic patients with inoperable CTEPH or persistent/recurrent PH after pulmonary endarterectomy.<br>Treprostinil s.c. may be considered in symptomatic patients who have been classified as having inoperable CTEPH or persistent/recurrent PH after pulmonary endarterectomy.<br>Off-label use of drugs approved for PAH may be considered in symptomatic patients who have been classified as having inoperable CTEPH. |
| <b>Justification</b>                                                                                                                                                                                                                                                                                                                                                                                                                                                                                                                                                                                                                                                                                    |
| Evidence shows improved pulmonary haemodynamics, exercise capacity, biomarkers, QoL, and long-term survival.                                                                                                                                                                                                                                                                                                                                                                                                                                                                                                                                                                                            |
| <b>Subgroup considerations</b>                                                                                                                                                                                                                                                                                                                                                                                                                                                                                                                                                                                                                                                                          |
| <b>Implementation considerations</b>                                                                                                                                                                                                                                                                                                                                                                                                                                                                                                                                                                                                                                                                    |

Continued

## Monitoring and evaluation

## Research priorities

There is a need for more RCTs, as current evidence for BPA is predominantly based on retrospective single-centre data.

## 17. References

- Guyatt GH, Oxman AD, Kunz R, Atkins D, Brozek J, Vist G, et al. GRADE guidelines: framing the question and deciding on important outcomes. *J Clin Epidemiol* 2011;**64**:395–400.
- Guyatt GH, Oxman AD, Vist G, Kunz R, Brozek J, Alonso-Coello P, et al. GRADE guidelines: rating the quality of evidence—study limitations (risk of bias). *J Clin Epidemiol* 2011;**64**:407–415.
- Guyatt GH, Oxman AD, Kunz R, Woodcock J, Brozek J, Helfand M, et al. GRADE guidelines: rating the quality of evidence—inconsistency. *J Clin Epidemiol* 2011;**64**:1294–1302.
- Guyatt GH, Oxman AD, Kunz R, Woodcock J, Brozek J, Helfand M, et al. GRADE guidelines: rating the quality of evidence—indirectness. *J Clin Epidemiol* 2011;**64**:1303–1310.
- Guyatt GH, Oxman AD, Kunz R, Brozek J, Alonso-Coello P, Rind D, et al. GRADE guidelines: rating the quality of evidence—imprecision. *J Clin Epidemiol* 2011;**64**:1283–1293.
- Alonso-Coello P, Oxman AD, Moberg J, Brignardello-Petersen R, Akl EA, Davoli M, et al. GRADE Evidence to Decision (EtD) frameworks: a systematic and transparent approach to making well informed healthcare choices. 2: Clinical practice guidelines. *BMJ* 2016;**353**:i2089.
- Andrews JC, Schunemann HJ, Oxman AD, Pottie K, Meerpohl JJ, Coello PA, et al. GRADE guidelines: 15. Going from evidence to recommendation—determinants of a recommendation's direction and strength. *J Clin Epidemiol* 2013;**66**:726–735.
- Miravittles M, Tonia T, Rigau D, Roche N, Genton C, Vaccaro V, et al. New era for European Respiratory Society clinical practice guidelines: joining efficiency and high methodological standards. *Eur Respir J* 2018;**51**:1800221.
- Kovacs G, Berghold A, Scheidl S, Olschewski H. Pulmonary arterial pressure during rest and exercise in healthy subjects: a systematic review. *Eur Respir J* 2009;**34**:888–894.
- Andersen MJ, Ersboll M, Bro-Jeppesen J, Gustafsson F, Hassager C, Kober L, et al. Exercise hemodynamics in patients with and without diastolic dysfunction and preserved ejection fraction after myocardial infarction. *Circ Heart Fail* 2012;**5**:444–451.
- Andersen MJ, Wolsk E, Bakkestrom R, Thomsen JH, Balling L, Dahl JS, et al. Hemodynamic response to rapid saline infusion compared with exercise in healthy participants aged 20–80 years. *J Card Fail* 2019;**25**:902–910.
- Bentley RF, Barker M, Esfandiari S, Wright SP, Valle FH, Granton JT, et al. Normal and abnormal relationships of pulmonary artery to wedge pressure during exercise. *J Am Heart Assoc* 2020;**9**:e016339.
- Buchan TA, Wright SP, Esfandiari S, Fuchs FC, Gray T, Currie KD, et al. Pulmonary hemodynamic and right ventricular responses to brief and prolonged exercise in middle-aged endurance athletes. *Am J Physiol Heart Circ Physiol* 2019;**316**:H326–H334.
- Claessen G, La Gerche A, Dymarkowski S, Claus P, Delcroix M, Heidbuchel H. Pulmonary vascular and right ventricular reserve in patients with normalized resting hemodynamics after pulmonary endarterectomy. *J Am Heart Assoc* 2015;**4**:e001602.
- Claeys M, Claessen G, La Gerche A, Petit T, Belge C, Meyns B, et al. Impaired cardiac reserve and abnormal vascular load limit exercise capacity in chronic thromboembolic disease. *JACC Cardiovasc Imaging* 2019;**12**:1444–1456.
- Esfandiari S, Wright SP, Goodman JM, Sasson Z, Mak S. Pulmonary artery wedge pressure relative to exercise work rate in older men and women. *Med Sci Sports Exerc* 2017;**49**:1297–1304.
- Fujimoto N, Borlaug BA, Lewis GD, Hastings JL, Shafer KM, Bhella PS, et al. Hemodynamic responses to rapid saline loading: the impact of age, sex, and heart failure. *Circulation* 2013;**127**:55–62.
- Gong H Jr, Wong R, Sarma RJ, Linn WS, Sullivan ED, Shamoo DA, et al. Cardiovascular effects of ozone exposure in human volunteers. *Am J Respir Crit Care Med* 1998;**158**:538–546.
- Hossack KF, Adair OV, Crowley ST. Atrial natriuretic factor production during upright exercise. *Cardiology* 1990;**77**:433–442.
- Liu J, Fei L, Huang GQ, Shang XK, Liu M, Pei ZJ, et al. Right ventricle performances with echocardiography and (99m)Tc myocardial perfusion imaging in pulmonary arterial hypertension patients. *Exp Biol Med* 2018;**243**:754–761.
- Regensteiner JG, Bauer TA, Reusch JE, Quaipe RA, Chen MY, Smith SC, et al. Cardiac dysfunction during exercise in uncomplicated type 2 diabetes. *Med Sci Sports Exerc* 2009;**41**:977–984.
- Remmen JJ, Aengevaeren WR, Verheugt FW, Bos A, Jansen RW. Lower body positive pressure by anti-G garment inflation: a suitable method to increase pulmonary capillary wedge pressure in healthy elderly subjects. *Clin Physiol Funct Imaging* 2005;**25**:27–33.
- Remmen JJ, Aengevaeren WR, Verheugt FW, Jansen RW. Detection of elevated pulmonary capillary wedge pressure in elderly patients with various cardiac disorders by the Valsalva manoeuvre. *Clin Sci (Lond)* 2006;**111**:153–162.
- Sullivan MJ, Cobb FR, Higginbotham MB. Stroke volume increases by similar mechanisms during upright exercise in normal men and women. *Am J Cardiol* 1991;**67**:1405–1412.
- Wolsk E, Bakkestrom R, Thomsen JH, Balling L, Andersen MJ, Dahl JS, et al. The influence of age on hemodynamic parameters during rest and exercise in healthy individuals. *JACC Heart Fail* 2017;**5**:337–346.
- Wright SP, Granton JT, Esfandiari S, Goodman JM, Mak S. The relationship of pulmonary vascular resistance and compliance to pulmonary artery wedge pressure during submaximal exercise in healthy older adults. *J Physiol* 2016;**594**:3307–3315.
- Maron BA, Hess E, Maddox TM, Opatowsky AR, Tedford RJ, Lahm T, et al. Association of borderline pulmonary hypertension with mortality and hospitalization in a large patient cohort: insights from the Veterans Affairs Clinical Assessment, Reporting, and Tracking Program. *Circulation* 2016;**133**:1240–1248.
- Maron BA, Brittan EL, Hess E, Waldo SW, Baron AE, Huang S, et al. Pulmonary vascular resistance and clinical outcomes in patients with pulmonary hypertension: a retrospective cohort study. *Lancet Respir Med* 2020;**8**:873–884.
- Assad TR, Maron BA, Robbins IM, Xu M, Huang S, Harrell FE, et al. Prognostic effect and longitudinal hemodynamic assessment of borderline pulmonary hypertension. *JAMA Cardiol* 2017;**2**:1361–1368.
- Douschan P, Kovacs G, Avian A, Foris V, Gruber F, Olschewski A, et al. Mild elevation of pulmonary arterial pressure as a predictor of mortality. *Am J Respir Crit Care Med* 2018;**197**:509–516.
- Heresi GA, Minaai OA, Tonelli AR, Hammel JP, Farha S, Parambil JG, et al. Clinical characterization and survival of patients with borderline elevation in pulmonary artery pressure. *Pulm Circ* 2013;**3**:916–925.
- Cooper R, Ghali J, Simmons BE, Castaner A. Elevated pulmonary artery pressure. An independent predictor of mortality. *Chest* 1991;**99**:112–120.
- Kimura M, Taniguchi H, Kondoh Y, Kimura T, Kataoka K, Nishiyama O, et al. Pulmonary hypertension as a prognostic indicator at the initial evaluation in idiopathic pulmonary fibrosis. *Respiration* 2013;**85**:456–463.
- Suzuki A, Taniguchi H, Watanabe N, Kondoh Y, Kimura T, Kataoka K, et al. Significance of pulmonary arterial pressure as a prognostic indicator in lung-dominant connective tissue disease. *PLoS One* 2014;**9**:e108339.
- Takahashi K, Taniguchi H, Ando M, Sakamoto K, Kondoh Y, Watanabe N, et al. Mean pulmonary arterial pressure as a prognostic indicator in connective tissue disease associated with interstitial lung disease: a retrospective cohort study. *BMC Pulm Med* 2016;**16**:55.
- Coghlan JG, Wolf M, Distler O, Denton CP, Doelberg M, Harutyunova S, et al. Incidence of pulmonary hypertension and determining factors in patients with systemic sclerosis. *Eur Respir J* 2018;**51**:1701197.
- Valerio CJ, Schreiber BE, Handler CE, Denton CP, Coghlan JG. Borderline mean pulmonary artery pressure in patients with systemic sclerosis: transpulmonary gradient predicts risk of developing pulmonary hypertension. *Arthritis Rheum* 2013;**65**:1074–1084.
- Xanthouli P, Jordan S, Milde N, Marra A, Blank N, Egenlauf B, et al. Haemodynamic phenotypes and survival in patients with systemic sclerosis: the impact of the new definition of pulmonary arterial hypertension. *Ann Rheum Dis* 2020;**79**:370–378.
- Brunner NW, Yue SF, Stub D, Ye J, Cheung A, Leipsic J, et al. The prognostic importance of the diastolic pulmonary gradient, transpulmonary gradient, and pulmonary vascular resistance in patients undergoing transcatheter aortic valve replacement. *Catheter Cardiovasc Interv* 2017;**90**:1185–1191.
- Raitiere O, Berthelot E, Fauvel C, Guignard N, Si Belkacem N, Sitbon O, et al. The dangerous and contradictory prognostic significance of PVR <3 WU when TAPSE <16 mm in postcapillary pulmonary hypertension. *ESC Heart Fail* 2020;**7**:2398–2405.

41. Vanderpool RR, Saul M, Nourai M, Gladwin MT, Simon MA. Association between hemodynamic markers of pulmonary hypertension and outcomes in heart failure with preserved ejection fraction. *JAMA Cardiol* 2018;**3**:298–306.
42. Ratwatte S, Anderson J, Strange G, Corrigan C, Collins N, Celermajer DS, et al. Pulmonary arterial hypertension with below threshold pulmonary vascular resistance. *Eur Respir J* 2020;**56**:1901654.
43. Ahlborg G, Ottosson-Seeberger A, Hemsén A, Lundberg JM. Central and regional hemodynamic effects during infusion of Big endothelin-1 in healthy humans. *J Appl Physiol* (1985) 1996;**80**:1921–1927.
44. Albert J, Schedin U, Lindqvist M, Melcher A, Hjemdahl P, Frostell C. Blockade of endogenous nitric oxide production results in moderate hypertension, reducing sympathetic activity and shortening bleeding time in healthy volunteers. *Acta Anaesthesiol Scand* 1997;**41**:1104–1113.
45. Berglund H, Edlund A, Theodorsson E, Vallin H. Haemodynamic and hormonal responses to cardiac pacing in humans: influence of different stimulation sequences and rates. *Clin Sci (Lond)* 1995;**88**:165–172.
46. Blitzer ML, Loh E, Roddy MA, Stamler JS, Creager MA. Endothelium-derived nitric oxide regulates systemic and pulmonary vascular resistance during acute hypoxia in humans. *J Am Coll Cardiol* 1996;**28**:591–596.
47. Chen YT, Kan MN, Lee AY, Chen JS, Chiang BN. Pulmonary venous flow: its relationship to left atrial and mitral valve motion. *J Am Soc Echocardiogr* 1993;**6**:387–394.
48. Dernellis J, Panaretou M. Assessment of left atrial input impedance in normal subjects and in hypertensive patients. *Eur J Heart Fail* 2005;**7**:63–68.
49. Domingo E, Grignola JC, Aguilar R, Arredondo C, Bouteldja N, Messeguer ML, et al. Impairment of pulmonary vascular reserve and right ventricular systolic reserve in pulmonary arterial hypertension. *BMC Pulm Med* 2014;**14**:69.
50. Edlund A, Sollevi A, Linde B. Haemodynamic and metabolic effects of infused adenosine in man. *Clin Sci (Lond)* 1990;**79**:131–138.
51. Gannedahl P, Odeberg S, Brodin LA, Sollevi A. Effects of posture and pneumoperitoneum during anaesthesia on the indices of left ventricular filling. *Acta Anaesthesiol Scand* 1996;**40**:160–166.
52. Gluskowski J, Gorecka D, Hawrylkiewicz I, Zielinski J. Acute effects of almitrine infusion on pulmonary haemodynamics in normal man. *Bull Eur Physiopathol Respir* 1984;**20**:313–317.
53. Hadinnapola C, Li Q, Su L, Pepke-Zaba J, Toshner M. The resistance-compliance product of the pulmonary circulation varies in health and pulmonary vascular disease. *Physiol Rep* 2015;**3**:e12363.
54. Hilty MP, Muller A, Fluck D, Siebenmann C, Rasmussen P, Keiser S, et al. Effect of increased blood flow on pulmonary circulation before and during high altitude acclimatization. *High Alt Med Biol* 2016;**17**:305–314.
55. Johansson M, Rundqvist B, Petersson M, Lambert G, Friberg P. Regional norepinephrine spillover in response to angiotensin-converting enzyme inhibition in healthy subjects. *J Hypertens* 2003;**21**:1371–1375.
56. Krovetz LJ, Goldbloom S. Normal standards for cardiovascular data. II. Pressure and vascular resistances. *Johns Hopkins Med J* 1972;**130**:187–195.
57. Kubo SH, Rector TS, Heifetz SM, Sato H, Cohn JN. Atrial natriuretic factor attenuates sympathetic reflexes during lower body negative pressure in normal men. *J Cardiovasc Pharmacol* 1990;**16**:881–889.
58. Kumar A, Anel R, Bunnell E, Habet K, Zanotti S, Marshall S, et al. Pulmonary artery occlusion pressure and central venous pressure fail to predict ventricular filling volume, cardiac performance, or the response to volume infusion in normal subjects. *Crit Care Med* 2004;**32**:691–699.
59. Lockhart A, Duhaze P, Polianski J, Weill D, Mensch-Dechene J. A modified double dye injection method for pulmonary blood volume determination. II. Results in resting and exercising normal subjects. *Cardiovasc Res* 1974;**8**:120–131.
60. Marshall VK, Bedford RF, Miller ED. Cardiovascular responses in the seated position—impact of four anesthetic techniques. *Anesth Analg* 1983;**62**:648–653.
61. McCabe C, White PA, Hoole SP, Axell RG, Priest AN, Gopalan D, et al. Right ventricular dysfunction in chronic thromboembolic obstruction of the pulmonary artery: a pressure-volume study using the conductance catheter. *J Appl Physiol* (1985) 2014;**116**:355–363.
62. Moe GW, Canepa-Anson R, Howard RJ, Armstrong PW. Response of atrial natriuretic factor to postural change in patients with heart failure versus subjects with normal hemodynamics. *J Am Coll Cardiol* 1990;**16**:599–606.
63. Pandey A, Kraus WE, Brubaker PH, Kitzman DW. Healthy aging and cardiovascular function: invasive hemodynamics during rest and exercise in 104 healthy volunteers. *JACC Heart Fail* 2020;**8**:111–121.
64. Parker MM, Ognibene FP, Parrillo JE. Peak systolic pressure/end-systolic volume ratio, a load-independent measure of ventricular function, is reversibly decreased in human septic shock. *Crit Care Med* 1994;**22**:1955–1959.
65. Riddez L, Hahn RG, Brismar B, Strandberg A, Svensen C, Hedenstierna G. Central and regional hemodynamics during acute hypovolemia and volume substitution in volunteers. *Crit Care Med* 1997;**25**:635–640.
66. Rubal BJ, Geer MR, Bickell WH. Effects of pneumatic antishock garment inflation in normovolemic subjects. *J Appl Physiol* (1985) 1989;**67**:339–345.
67. Stamler JS, Loh E, Roddy MA, Currie KE, Creager MA. Nitric oxide regulates basal systemic and pulmonary vascular resistance in healthy humans. *Circulation* 1994;**89**:2035–2040.
68. Stickland MK, Welsh RC, Haykowsky MJ, Petersen SR, Anderson WD, Taylor DA, et al. Effect of acute increases in pulmonary vascular pressures on exercise pulmonary gas exchange. *J Appl Physiol* (1985) 2006;**100**:1910–1917.
69. Uhl GS, Boucher CA, Oliveros RA, Murgu JP. Exercise-induced myocardial oxygen supply-demand imbalance in asymptomatic or mildly symptomatic aortic regurgitation. *Chest* 1981;**80**:686–691.
70. van Empel VP, Mariani J, Borlaug BA, Kaye DM. Impaired myocardial oxygen availability contributes to abnormal exercise hemodynamics in heart failure with preserved ejection fraction. *J Am Heart Assoc* 2014;**3**:e001293.
71. Watts JA, Kelly FR, Bauch TD, Murgu JP, Rubal BJ. Rest and exercise hemodynamic and metabolic findings in active duty soldiers referred for cardiac catheterization to exclude heart disease: insights from past invasive cardiopulmonary exercise testing using multisensor high fidelity catheters. *Catheter Cardiovasc Interv* 2018;**91**:35–46.
72. Weaver LK, Howe S, Snow GL, Deru K. Arterial and pulmonary arterial hemodynamics and oxygen delivery/extraction in normal humans exposed to hyperbaric air and oxygen. *J Appl Physiol* (1985) 2009;**107**:336–345.
73. Yagi H, Yamada H, Kobayashi T, Sekiguchi M. Doppler assessment of pulmonary hypertension induced by hypoxic breathing in subjects susceptible to high altitude pulmonary edema. *Am Rev Respir Dis* 1990;**142**:796–801.
74. Carrick-Ranson G, Hastings JL, Bhella PS, Shibata S, Fujimoto N, Palmer MD, et al. Effect of healthy aging on left ventricular relaxation and diastolic suction. *Am J Physiol Heart Circ Physiol* 2012;**303**:H315–H322.
75. Firstenberg MS, Levine BD, Garcia MJ, Greenberg NL, Cardon L, Morehead AJ, et al. Relationship of echocardiographic indices to pulmonary capillary wedge pressures in healthy volunteers. *J Am Coll Cardiol* 2000;**36**:1664–1669.
76. Fujimoto N, Prasad A, Hastings JL, Arbab-Zadeh A, Bhella PS, Shibata S, et al. Cardiovascular effects of 1 year of progressive and vigorous exercise training in previously sedentary individuals older than 65 years of age. *Circulation* 2010;**122**:1797–1805.
77. Fujimoto N, Hastings JL, Bhella PS, Shibata S, Gandhi NK, Carrick-Ranson G, et al. Effect of ageing on left ventricular compliance and distensibility in healthy sedentary humans. *J Physiol* 2012;**590**:1871–1880.
78. Fujimoto N, Hastings JL, Carrick-Ranson G, Shafer KM, Shibata S, Bhella PS, et al. Cardiovascular effects of 1 year of alagebrum and endurance exercise training in healthy older individuals. *Circ Heart Fail* 2013;**6**:1155–1164.
79. Higginbotham MB, Morris KG, Williams RS, McHale PA, Coleman RE, Cobb FR. Regulation of stroke volume during submaximal and maximal upright exercise in normal man. *Circ Res* 1986;**58**:281–291.
80. Howden EJ, Sarma S, Lawley JS, Opondo M, Cornwell W, Stoller D, et al. Reversing the cardiac effects of sedentary aging in middle age—a randomized controlled trial: Implications for heart failure prevention. *Circulation* 2018;**137**:1549–1560.
81. Katkov VE, Chestukhin VV, Nikolayenko EM, Rummyantsev VV, Gvozdev SV. Central circulation of a normal man during 7-day head-down tilt and decompression of various body parts. *Aviat Space Environ Med* 1983;**54**:S24–S30.
82. Koskinen P, Kupari M, Nieminen MS, Suokas A, Totterman K, Pajari R, et al. Effects of alcohol on systemic and pulmonary hemodynamics in normal humans. *Clin Cardiol* 1986;**9**:479–482.
83. Lollgen H, Klein KE, Gebhardt U, Beier J, Hordinsky J, Sarrasch V, et al. Hemodynamic response to LBNP following 2 hours HDT (-6 degrees). *Aviat Space Environ Med* 1986;**57**:406–412.
84. Maeder MT, Thompson BR, Brunner-La Rocca HP, Kaye DM. Hemodynamic basis of exercise limitation in patients with heart failure and normal ejection fraction. *J Am Coll Cardiol* 2010;**56**:855–863.
85. Okada RD, Osbakken MD, Boucher CA, Strauss HW, Block PC, Pohost GM. Pulmonary blood volume ratio response to exercise; a noninvasive determination of exercise-induced changes in pulmonary capillary wedge pressure. *Circulation* 1982;**65**:126–133.
86. Oki T, Kageji Y, Fukuda N, Iuchi A, Tabata T, Manabe K, et al. Assessment of left atrial pressure and volume changes during atrial systole with transesophageal pulsed Doppler echocardiography of transmitral and pulmonary venous flow velocities. *Jpn Heart J* 1996;**37**:333–342.
87. Oliveira RK, Agarwal M, Tracy JA, Karin AL, Opatowsky AR, Waxman AB, et al. Age-related upper limits of normal for maximum upright exercise pulmonary hemodynamics. *Eur Respir J* 2016;**47**:1179–1188.
88. Prasad A, Okazaki K, Arbab-Zadeh A, Dijk E, Fu Q, Thomas JD, et al. Abnormalities of Doppler measures of diastolic function in the healthy elderly are not related to alterations of left atrial pressure. *Circulation* 2005;**111**:1499–1503.
89. Shibata S, Hastings JL, Prasad A, Fu Q, Bhella PS, Pacini E, et al. Congestive heart failure with preserved ejection fraction is associated with severely impaired dynamic Starling mechanism. *J Appl Physiol* (1985) 2011;**110**:964–971.

90. van Empel VP, Kaye DM, Borlaug BA. Effects of healthy aging on the cardiopulmonary hemodynamic response to exercise. *Am J Cardiol* 2014;**114**:131–135.
91. Zhao L, Mason NA, Morrell NV, Kojonazarov B, Sadykov A, Maripov A, et al. Sildenafil inhibits hypoxia-induced pulmonary hypertension. *Circulation* 2001;**104**:424–428.
92. Ottervanger JP, Kruijssen HA, Hoes AW, Hofman A. Long-term prognostic importance of a single pulmonary wedge pressure measurement after myocardial infarction: a ten-year follow-up study. *Int J Cardiol* 1994;**43**:239–246.
93. Aalders M, Kok W. Comparison of hemodynamic factors predicting prognosis in heart failure: a systematic review. *J Clin Med* 2019;**8**:1757.
94. Rubin LJ, Mendoza J, Hood M, McGoon M, Barst R, Williams WB, et al. Treatment of primary pulmonary hypertension with continuous intravenous prostacyclin (epoprostenol). Results of a randomized trial. *Ann Intern Med* 1990;**112**:485–491.
95. Barst RJ, Rubin LJ, Long WA, McGoon MD, Rich S, Badesch DB, et al. A comparison of continuous intravenous epoprostenol (prostacyclin) with conventional therapy for primary pulmonary hypertension. The Primary Pulmonary Hypertension Study Group. *N Engl J Med* 1996;**334**:296–302.
96. Rubin LJ, Badesch DB, Barst RJ, Galie N, Black CM, Keogh A, et al. Bosentan therapy for pulmonary arterial hypertension. *N Engl J Med* 2002;**346**:896–903.
97. Olschewski H, Simonneau G, Galie N, Higenbottam T, Naeije R, Rubin LJ, et al. Inhaled iloprost for severe pulmonary hypertension. *N Engl J Med* 2002;**347**:322–329.
98. Simonneau G, Barst RJ, Galie N, Naeije R, Rich S, Bourge RC, et al. Continuous subcutaneous infusion of treprostinil, a prostacyclin analogue, in patients with pulmonary arterial hypertension: a double-blind, randomized, placebo-controlled trial. *Am J Respir Crit Care Med* 2002;**165**:800–804.
99. Galie N, Torbicki A, Barst R, Dartevelle P, Haworth S, Higenbottam T, et al. Guidelines on diagnosis and treatment of pulmonary arterial hypertension. The Task Force on Diagnosis and Treatment of Pulmonary Arterial Hypertension of the European Society of Cardiology. *Eur Heart J* 2004;**25**:2243–2278.
100. Galie N, Ghofrani HA, Torbicki A, Barst RJ, Rubin LJ, Badesch D, et al. Sildenafil citrate therapy for pulmonary arterial hypertension. *N Engl J Med* 2005;**353**:2148–2157.
101. Galie N, Olschewski H, Oudiz RJ, Torres F, Frost A, Ghofrani HA, et al. Ambrisentan for the treatment of pulmonary arterial hypertension: results of the ambrisentan in pulmonary arterial hypertension, randomized, double-blind, placebo-controlled, multicenter, efficacy (ARIES) study 1 and 2. *Circulation* 2008;**117**:3010–3019.
102. Galie N, Brundage BH, Ghofrani HA, Oudiz RJ, Simonneau G, Safdar Z, et al. Tadalafil therapy for pulmonary arterial hypertension. *Circulation* 2009;**119**:2894–2903.
103. Galie N, Hoeper MM, Humbert M, Torbicki A, Vachiery JL, Barbera JA, et al. Guidelines for the diagnosis and treatment of pulmonary hypertension: the Task Force for the Diagnosis and Treatment of Pulmonary Hypertension of the European Society of Cardiology (ESC) and the European Respiratory Society (ERS), endorsed by the International Society of Heart and Lung Transplantation (ISHLT). *Eur Heart J* 2009;**30**:2493–2537.
104. Task Force for Diagnosis and Treatment of Pulmonary Hypertension of European Society of Cardiology (ESC); European Respiratory Society (ERS); International Society of Heart and Lung Transplantation (ISHLT); Galie N, Hoeper MM, Humbert M, et al. Guidelines for the diagnosis and treatment of pulmonary hypertension. *Eur Respir J* 2009;**34**:1219–1263.
105. Pulido T, Adzerikho I, Channick RN, Delcroix M, Galie N, Ghofrani HA, et al. Macitentan and morbidity and mortality in pulmonary arterial hypertension. *N Engl J Med* 2013;**369**:809–818.
106. Ghofrani HA, Galie N, Grimminger F, Grunig E, Humbert M, Jing ZC, et al. Riociguat for the treatment of pulmonary arterial hypertension. *N Engl J Med* 2013;**369**:330–340.
107. Galie N, Humbert M, Vachiery JL, Gibbs S, Lang I, Torbicki A, et al. 2015 ESC/ERS Guidelines for the diagnosis and treatment of pulmonary hypertension: The Joint Task Force for the Diagnosis and Treatment of Pulmonary Hypertension of the European Society of Cardiology (ESC) and the European Respiratory Society (ERS): Endorsed by: Association for European Paediatric and Congenital Cardiology (AEPC), International Society for Heart and Lung Transplantation (ISHLT). *Eur Respir J* 2015;**46**:903–975.
108. Galie N, Humbert M, Vachiery JL, Gibbs S, Lang I, Torbicki A, et al. 2015 ESC/ERS Guidelines for the diagnosis and treatment of pulmonary hypertension: The Joint Task Force for the Diagnosis and Treatment of Pulmonary Hypertension of the European Society of Cardiology (ESC) and the European Respiratory Society (ERS): Endorsed by: Association for European Paediatric and Congenital Cardiology (AEPC), International Society for Heart and Lung Transplantation (ISHLT). *Eur Heart J* 2016;**37**:67–119.
109. Sitbon O, Channick R, Chin KM, Frey A, Gaine S, Galie N, et al. Selexipag for the treatment of pulmonary arterial hypertension. *N Engl J Med* 2015;**373**:2522–2533.
110. Moreira EM, Gall H, Leening MJ, Lahousse L, Loth DW, Krijthe BP, et al. Prevalence of pulmonary hypertension in the general population: the Rotterdam study. *PLoS One* 2015;**10**:e0130072.
111. D'Alto M, Romeo E, Argiento P, D'Andrea A, Vanderpool R, Correria A, et al. Accuracy and precision of echocardiography versus right heart catheterization for the assessment of pulmonary hypertension. *Int J Cardiol* 2013;**168**:4058–4062.
112. Gall H, Yogeswaran A, Fuge J, Sommer N, Grimminger F, Seeger WW, et al. Validity of echocardiographic tricuspid regurgitation gradient to screen for new definition of pulmonary hypertension. *EClinicalMedicine* 2021;**34**:100822.
113. D'Alto M, Di Maio M, Romeo E, Argiento P, Blasi E, Di Vilio A, et al. Echocardiographic probability of pulmonary hypertension: a validation study. *Eur Respir J* 2022;2102548. doi:10.1183/13993003.02548-2021. Epub ahead of print.
114. Weyman AE. *Principles and practice of echocardiography*. 2nd ed. Philadelphia: Lippincott Williams & Wilkins; 1994.
115. Badagliacca R, Poscia R, Pezzuto B, Papa S, Nona A, Mancone M, et al. Pulmonary arterial dilatation in pulmonary hypertension: prevalence and prognostic relevance. *Cardiology* 2012;**121**:76–82.
116. Terzikhan N, Bos D, Lahousse L, Wolff L, Verhamme KMC, Leening MJG, et al. Pulmonary artery to aorta ratio and risk of all-cause mortality in the general population: the Rotterdam Study. *Eur Respir J* 2017;**49**:1602168.
117. Huston JH, Maron BA, French J, Huang S, Thayer T, Farber-Eger EH, et al. Association of mild echocardiographic pulmonary hypertension with mortality and right ventricular function. *JAMA Cardiol* 2019;**4**:1112–1121.
118. Tello K, Axmann J, Ghofrani HA, Naeije R, Narcin N, Rieth A, et al. Relevance of the TAPSE/PASP ratio in pulmonary arterial hypertension. *Int J Cardiol* 2018;**266**:229–235.
119. Tello K, Wan J, Dalmer A, Vanderpool R, Ghofrani HA, Naeije R, et al. Validation of the tricuspid annular plane systolic excursion/systolic pulmonary artery pressure ratio for the assessment of right ventricular-arterial coupling in severe pulmonary hypertension. *Circ Cardiovasc Imaging* 2019;**12**:e009047.
120. Santaniello A, Casella R, Vicenzi M, Rota I, Montanelli G, De Santis M, et al. Cardiopulmonary exercise testing in a combined screening approach to individuate pulmonary arterial hypertension in systemic sclerosis. *Rheumatology (Oxford)* 2020;**59**:1581–1586.
121. Dumitrescu D, Nagel C, Kovacs G, Bollmann T, Halank M, Winkler J, et al. Cardiopulmonary exercise testing for detecting pulmonary arterial hypertension in systemic sclerosis. *Heart* 2017;**103**:774–782.
122. Amsalem M, Sweatt AJ, Aymami MC, Kuznetsova T, Selej M, Lu H, et al. Right heart end-systolic remodeling index strongly predicts outcomes in pulmonary arterial hypertension: comparison with validated models. *Circ Cardiovasc Imaging* 2017;**10**:e005771.
123. Badagliacca R, Poscia R, Pezzuto B, Papa S, Reali M, Pesce F, et al. Prognostic relevance of right heart reverse remodeling in idiopathic pulmonary arterial hypertension. *J Heart Lung Transplant* 2018;**37**:195–205.
124. Chen L, Larsen CM, Le RJ, Connolly HM, Pislaru SV, Murphy JG, et al. The prognostic significance of tricuspid valve regurgitation in pulmonary arterial hypertension. *Clin Respir J* 2018;**12**:1572–1580.
125. Ghio S, Mercurio V, Fortuni F, Forfia PR, Gall H, Ghofrani A, et al. A comprehensive echocardiographic method for risk stratification in pulmonary arterial hypertension. *Eur Respir J* 2020;**56**:2000513.
126. Badagliacca R, Papa S, Valli G, Pezzuto B, Poscia R, Manzi G, et al. Echocardiography combined with cardiopulmonary exercise testing for the prediction of outcome in idiopathic pulmonary arterial hypertension. *Chest* 2016;**150**:1313–1322.
127. Ernande L, Cottin V, Leroux PY, Girerd N, Huez S, Mulliez A, et al. Right isovolumic contraction velocity predicts survival in pulmonary hypertension. *J Am Soc Echocardiogr* 2013;**26**:297–306.
128. Fenstad ER, Le RJ, Sinak LJ, Maradit-Kremers H, Ammash NM, Ayalew AM, et al. Pericardial effusions in pulmonary arterial hypertension: characteristics, prognosis, and role of drainage. *Chest* 2013;**144**:1530–1538.
129. Batal O, Dardari Z, Costabile C, Gorcsan J, Arena VC, Mathier MA. Prognostic value of pericardial effusion on serial echocardiograms in pulmonary arterial hypertension. *Echocardiography* 2015;**32**:1471–1476.
130. Badagliacca R, Pezzuto B, Papa S, Poscia R, Manzi G, Pascarella A, et al. Right ventricular strain curve morphology and outcome in idiopathic pulmonary arterial hypertension. *JACC Cardiovasc Imaging* 2021;**14**:162–172.
131. Badagliacca R, Reali M, Poscia R, Pezzuto B, Papa S, Mezzapesa M, et al. Right intraventricular dyssynchrony in idiopathic, heritable, and anorexigen-induced pulmonary arterial hypertension: clinical impact and reversibility. *JACC Cardiovasc Imaging* 2015;**8**:642–652.
132. van Wolferen SA, Marcus JT, Boonstra A, Marques KM, Bronzwaer JG, Spreeuwenberg MD, et al. Prognostic value of right ventricular mass, volume, and function in idiopathic pulmonary arterial hypertension. *Eur Heart J* 2007;**28**:1250–1257.

133. Swift AJ, Capener D, Johns C, Hamilton N, Rothman A, Elliot C, et al. Magnetic resonance imaging in the prognostic evaluation of patients with pulmonary arterial hypertension. *Am J Respir Crit Care Med* 2017;**196**:228–239.
134. Lewis RA, Johns CS, Cogliano M, Capener D, Tubman E, Elliot CA, et al. Identification of cardiac magnetic resonance imaging thresholds for risk stratification in pulmonary arterial hypertension. *Am J Respir Crit Care Med* 2020;**201**:458–466.
135. Badagliacca R, Poscia R, Pezuto B, Papa S, Pesce F, Manzi G, et al. Right ventricular concentric hypertrophy and clinical worsening in idiopathic pulmonary arterial hypertension. *J Heart Lung Transplant* 2016;**35**:1321–1329.
136. Brewis MJ, Bellofiore A, Vanderpool RR, Chesler NC, Johnson MK, Naeije R, et al. Imaging right ventricular function to predict outcome in pulmonary arterial hypertension. *Int J Cardiol* 2016;**218**:206–211.
137. van der Bruggen CE, Handoko ML, Bogaard HJ, Marcus JT, Oosterveer FPT, Meijboom LJ, et al. The value of hemodynamic measurements or cardiac MRI in the follow-up of patients with idiopathic pulmonary arterial hypertension. *Chest* 2021;**159**:1575–1585.
138. Courand PY, Pina Jomir G, Khouatra C, Scheiber C, Turquier S, Glerant JC, et al. Prognostic value of right ventricular ejection fraction in pulmonary arterial hypertension. *Eur Respir J* 2015;**45**:139–149.
139. Benza RL, Kanwar MK, Raina A, Scott JV, Zhao CL, Selej M, et al. Development and validation of an abridged version of the REVEAL 2.0 risk score calculator, REVEAL Lite 2, for use in patients with pulmonary arterial hypertension. *Chest* 2021;**159**:337–346.
140. Hjalmarsson C, Kjellström B, Jansson K, Nisell M, Kylhammar D, Kavianipour M, et al. Early risk prediction in patients with idiopathic versus connective tissue disease-associated pulmonary arterial hypertension: call for a refined assessment. *ERJ Open Res* 2021;**7**:00854–02020.
141. Hjalmarsson C, Rådegran G, Kylhammar D, Rundqvist B, Møltng J, Nisell MD, et al. Impact of age and comorbidity on risk stratification in idiopathic pulmonary arterial hypertension. *Eur Respir J* 2018;**51**:1702310.
142. Humbert M, Farber HW, Ghofrani HA, Benza RL, Busse D, Meier C, et al. Risk assessment in pulmonary arterial hypertension and chronic thromboembolic pulmonary hypertension. *Eur Respir J* 2019;**53**:1802004.
143. Kylhammar D, Kjellström B, Hjalmarsson C, Jansson K, Nisell M, Söderberg S, et al. A comprehensive risk stratification at early follow-up determines prognosis in pulmonary arterial hypertension. *Eur Heart J* 2018;**39**:4175–4181.
144. Benza RL, Lohmueller LC, Kraissangka J, Kanwar M. Risk assessment in pulmonary arterial hypertension patients: the long and short of it. *Adv Pulm Hypertens* 2018;**16**:125–135.
145. Boucly A, Weatherald J, Savale L, Jais X, Cottin V, Prevot G, et al. Risk assessment, prognosis and guideline implementation in pulmonary arterial hypertension. *Eur Respir J* 2017;**50**:1700889.
146. Hoeper MM, Kramer T, Pan Z, Eichstaedt CA, Spiesshoefer J, Benjamin N, et al. Mortality in pulmonary arterial hypertension: prediction by the 2015 European pulmonary hypertension guidelines risk stratification model. *Eur Respir J* 2017;**50**:1700740.
147. Badagliacca R, D'Alto M, Ghio S, Argiento P, Bellomo V, Brunetti ND, et al. Risk reduction and hemodynamics with initial combination therapy in pulmonary arterial hypertension. *Am J Respir Crit Care Med* 2021;**203**:484–492.
148. Bouzina H, Rådegran G, Butler O, Hesselstrand R, Hjalmarsson C, Holl K, et al. Longitudinal changes in risk status in pulmonary arterial hypertension. *ESC Heart Fail* 2021;**8**:680–690.
149. Kanwar M, Khan MS, Raina A, Badagliacca R, Antaki J, Amin E, et al. Role of echocardiogram in predicting prognosis in pulmonary arterial hypertension: A meta-analysis. *J Heart Lung Transplant* 2020;**39**:S509.
150. Sitbon O, Benza RL, Badesch DB, Barst RJ, Elliott CG, Gressin V, et al. Validation of two predictive models for survival in pulmonary arterial hypertension. *Eur Respir J* 2015;**46**:152–164.
151. Yogeswaran A, Richter MJ, Sommer N, Ghofrani HA, Seeger W, Tello K, et al. Advanced risk stratification of intermediate risk group in pulmonary arterial hypertension. *Pulm Circ* 2020;**10**:2045894020961739.
152. Zelniker TA, Huscher D, Vonk-Noordegraaf A, Ewert R, Lange TJ, Klose H, et al. The 6MWT as a prognostic tool in pulmonary arterial hypertension: results from the COMPERA registry. *Clin Res Cardiol* 2018;**107**:460–470.
153. Galiè N, Badesch D, Oudiz R, Simonneau G, McGoon MD, Keogh AM, et al. Ambrisentan therapy for pulmonary arterial hypertension. *J Am Coll Cardiol* 2005;**46**:529–535.
154. Oudiz RJ, Galiè N, Olschewski H, Torres F, Frost A, Ghofrani HA, et al. Long-term ambrisentan therapy for the treatment of pulmonary arterial hypertension. *J Am Coll Cardiol* 2009;**54**:1971–1981.
155. Channick RN, Simonneau G, Sitbon O, Robbins IM, Frost A, Tapson VF, et al. Effects of the dual endothelin-receptor antagonist bosentan in patients with pulmonary hypertension: a randomised placebo-controlled study. *Lancet* 2001;**358**:1119–1123.
156. Galiè N, Rubin L, Hoeper M, Jansa P, Al-Hiti H, Meyer G, et al. Treatment of patients with mildly symptomatic pulmonary arterial hypertension with bosentan (EARLY study): a double-blind, randomised controlled trial. *Lancet* 2008;**371**:2093–2100.
157. Galiè N, Jansa P, Pulido T, Channick RN, Delcroix M, Ghofrani HA, et al. SERAPHIN haemodynamic substudy: the effect of the dual endothelin receptor antagonist macitentan on haemodynamic parameters and NT-proBNP levels and their association with disease progression in patients with pulmonary arterial hypertension. *Eur Heart J* 2017;**38**:1147–1155.
158. Sitbon O, Bosch J, Cottreel E, Csonka D, de Groote P, Hoeper MM, et al. Macitentan for the treatment of portopulmonary hypertension (PORTICO): a multicentre, randomised, double-blind, placebo-controlled, phase 4 trial. *Lancet Respir Med* 2019;**7**:594–604.
159. Rubin LJ, Badesch DB, Fleming TR, Galiè N, Simonneau G, Ghofrani HA, et al. Long-term treatment with sildenafil citrate in pulmonary arterial hypertension: the SUPER-2 study. *Chest* 2011;**140**:1274–1283.
160. Barst RJ, Beghetti M, Pulido T, Layton G, Konourina I, Zhang M, et al. STARTS-2: long-term survival with oral sildenafil monotherapy in treatment-naïve pediatric pulmonary arterial hypertension. *Circulation* 2014;**129**:1914–1923.
161. Oudiz RJ, Brundage BH, Galiè N, Ghofrani HA, Simonneau G, Botros FT, et al. Tadalafil for the treatment of pulmonary arterial hypertension: a double-blind 52-week uncontrolled extension study. *J Am Coll Cardiol* 2012;**60**:768–774.
162. Rubin LJ, Galiè N, Grimminger F, Grunig E, Humbert M, Jing ZC, et al. Riociguat for the treatment of pulmonary arterial hypertension: a long-term extension study (PATENT-2). *Eur Respir J* 2015;**45**:1303–1313.
163. Badesch DB, Tapson VF, McGoon MD, Brundage BH, Rubin LJ, Wigley FM, et al. Continuous intravenous epoprostenol for pulmonary hypertension due to the scleroderma spectrum of disease. A randomized, controlled trial. *Ann Intern Med* 2000;**132**:425–434.
164. McLaughlin VV, Shillington A, Rich S. Survival in primary pulmonary hypertension: the impact of epoprostenol therapy. *Circulation* 2002;**106**:1477–1482.
165. Sitbon O, Humbert M, Nunes H, Parent F, Garcia G, Herve P, et al. Long-term intravenous epoprostenol infusion in primary pulmonary hypertension: prognostic factors and survival. *J Am Coll Cardiol* 2002;**40**:780–788.
166. Badesch DB, McGoon MD, Barst RJ, Tapson VF, Rubin LJ, Wigley FM, et al. Long-term survival among patients with scleroderma-associated pulmonary arterial hypertension treated with intravenous epoprostenol. *J Rheumatol* 2009;**36**:2244–2249.
167. Hoeper MM, Schwarze M, Ehlerting S, Adler-Schuermeier A, Spiekerkoetter E, Niedermeyer J, et al. Long-term treatment of primary pulmonary hypertension with aerosolized iloprost, a prostacyclin analogue. *N Engl J Med* 2000;**342**:1866–1870.
168. Higenbottam T, Butt AY, McMahon A, Westerbeck R, Sharples L. Long-term intravenous prostaglandin (epoprostenol or iloprost) for treatment of severe pulmonary hypertension. *Heart* 1998;**80**:151–155.
169. Hoeper MM, Spiekerkoetter E, Westerkamp V, Gatzke R, Fabel H. Intravenous iloprost for treatment failure of aerosolized iloprost in pulmonary arterial hypertension. *Eur Respir J* 2002;**20**:339–343.
170. Hoeper MM, Gall H, Seyfarth HJ, Halank M, Ghofrani HA, Winkler J, et al. Long-term outcome with intravenous iloprost in pulmonary arterial hypertension. *Eur Respir J* 2009;**34**:132–137.
171. Barst RJ, Galiè N, Naeije R, Simonneau G, Jeffs R, Arneson C, et al. Long-term outcome in pulmonary arterial hypertension patients treated with subcutaneous treprostinil. *Eur Respir J* 2006;**28**:1195–1203.
172. Lang I, Gomez-Sanchez M, Kneussl M, Naeije R, Escribano P, Skoro-Sajer N, et al. Efficacy of long-term subcutaneous treprostinil sodium therapy in pulmonary hypertension. *Chest* 2006;**129**:1636–1643.
173. Sadushi-Kolici R, Skoro-Sajer N, Zimmer D, Bonderman D, Schemper M, Klepetko W, et al. Long-term treatment, tolerability, and survival with subcutaneous treprostinil for severe pulmonary hypertension. *J Heart Lung Transplant* 2012;**31**:735–743.
174. Voswinckel R, Enke B, Reichenberger F, Kohstall M, Kreckel A, Krick S, et al. Favorable effects of inhaled treprostinil in severe pulmonary hypertension: results from randomized controlled pilot studies. *J Am Coll Cardiol* 2006;**48**:1672–1681.
175. Hiremath J, Thanikachalam S, Parikh K, Shanmugasundaram S, Bangersa S, Shapiro L, et al. Exercise improvement and plasma biomarker changes with intravenous treprostinil therapy for pulmonary arterial hypertension: a placebo-controlled trial. *J Heart Lung Transplant* 2010;**29**:137–149.
176. Gombert-Maitland M, Tapson VF, Benza RL, McLaughlin VV, Krichman A, Widlitz AC, et al. Transition from intravenous epoprostenol to intravenous treprostinil in pulmonary hypertension. *Am J Respir Crit Care Med* 2005;**172**:1586–1589.
177. Sitbon O, Manes A, Jais X, Pallazini M, Humbert M, Presotto L, et al. Rapid switch from intravenous epoprostenol to intravenous treprostinil in patients with pulmonary arterial hypertension. *J Cardiovasc Pharmacol* 2007;**49**:1–5.

178. Jing ZC, Parikh K, Pulido T, Jerjes-Sanchez C, White RJ, Allen R, et al. Efficacy and safety of oral treprostinil monotherapy for the treatment of pulmonary arterial hypertension: a randomized, controlled trial. *Circulation* 2013;**127**:624–633.
179. Galiè N, Humbert M, Vachiery JL, Vizza CD, Kneussl M, Manes A, et al. Effects of beraprost sodium, an oral prostacyclin analogue, in patients with pulmonary arterial hypertension: a randomized, double-blind, placebo-controlled trial. *J Am Coll Cardiol* 2002;**39**:1496–1502.
180. Barst RJ, McGoon M, McLaughlin V, Tapson V, Rich S, Rubin L, et al. Beraprost therapy for pulmonary arterial hypertension. *J Am Coll Cardiol* 2003;**41**:2119–2125.
181. Venitz J, Zack J, Gillies H, Allard M, Regnault J, Dufton C. Clinical pharmacokinetics and drug-drug interactions of endothelin receptor antagonists in pulmonary arterial hypertension. *J Clin Pharmacol* 2012;**52**:1784–1805.
182. Grunig E, Ohnesorge J, Benjamin N, Burhenne J, Enderle Y, Egenlauf B, et al. Plasma drug concentrations in patients with pulmonary arterial hypertension on combination treatment. *Respiration* 2017;**94**:26–37.
183. Paul GA, Gibbs JS, Boobis AR, Abbas A, Wilkins MR. Bosentan decreases the plasma concentration of sildenafil when coprescribed in pulmonary hypertension. *Br J Clin Pharmacol* 2005;**60**:107–112.
184. Sidharta PN, Krahenbuhl S, Dingemans J. Pharmacokinetic and pharmacodynamic evaluation of macitentan, a novel endothelin receptor antagonist for the treatment of pulmonary arterial hypertension. *Expert Opin Drug Metab Toxicol* 2015;**11**:437–449.
185. Sardana M, Moll M, Farber HW. Pharmacokinetic drug evaluation of selexipag for the treatment of pulmonary arterial hypertension. *Expert Opin Drug Metab Toxicol* 2016;**12**:1513–1520.
186. Axelsen LN, Poggessi I, Rasschaert F, Perez Ruixo JJ, Bruderer S. Clopidogrel, a CYP2C8 inhibitor, causes a clinically relevant increase in the systemic exposure to the active metabolite of selexipag in healthy subjects. *Br J Clin Pharmacol* 2021;**87**:119–128.
187. Chaumais MC, Perrin S, Sitbon O, Simonneau G, Humbert M, Montani D. Pharmacokinetic evaluation of sildenafil as a pulmonary hypertension treatment. *Expert Opin Drug Metab Toxicol* 2013;**9**:1193–1205.
188. Rehse K, Scheffler H, Reitner N. Interaction of Viagra with the NO donors molsidomine and RE 2047 with regard to antithrombotic and blood pressure lowering activities. *Arch Pharm (Weinheim)* 1999;**332**:182–184.
189. Wrishko RE, Dingemans J, Yu A, Darstein C, Phillips DL, Mitchell MI. Pharmacokinetic interaction between tadalafil and bosentan in healthy male subjects. *J Clin Pharmacol* 2008;**48**:610–618.
190. Frey R, Becker C, Saleh S, Unger S, van der Mey D, Muck W. Clinical pharmacokinetic and pharmacodynamic profile of riociguat. *Clin Pharmacokinet* 2018;**57**:647–661.
191. National Pulmonary Hypertension Centres of the UK and Ireland. Consensus statement on the management of pulmonary hypertension in clinical practice in the UK and Ireland. *Heart* 2008;**94**:1–41.
192. Bosch L, Lam CSP, Gong L, Chan SP, Sim D, Yeo D, et al. Right ventricular dysfunction in left-sided heart failure with preserved versus reduced ejection fraction. *Eur J Heart Fail* 2017;**19**:1664–1671.
193. Tedford RJ, Hassoun PM, Mathai SC, Gargis RE, Russell SD, Thieme DR, et al. Pulmonary capillary wedge pressure augments right ventricular pulsatile loading. *Circulation* 2012;**125**:289–297.
194. Pellegrini P, Rossi A, Pasotti M, Raineri C, Ciccoira M, Bonapace S, et al. Prognostic relevance of pulmonary arterial compliance in patients with chronic heart failure. *Chest* 2014;**145**:1064–1070.
195. Dell'Italia LJ. Anatomy and physiology of the right ventricle. *Cardiol Clin* 2012;**30**:167–187.
196. Sanz J, Sanchez-Quintana D, Bossone E, Bogaard HJ, Naeije R. Anatomy, function, and dysfunction of the right ventricle: JACC State-of-the-Art Review. *J Am Coll Cardiol* 2019;**73**:1463–1482.
197. Dreyfus GD, Martin RP, Chan KM, Dulguerov F, Alexandrescu C. Functional tricuspid regurgitation: a need to revise our understanding. *J Am Coll Cardiol* 2015;**65**:2331–2336.
198. Muraru D, Parati G, Badano L. The importance and the challenges of predicting the progression of functional tricuspid regurgitation. *JACC Cardiovasc Imaging* 2020;**13**:1652–1654.
199. Andersen MJ, Hwang SJ, Kane GC, Melenovsky V, Olson TP, Fetterly K, et al. Enhanced pulmonary vasodilator reserve and abnormal right ventricular: pulmonary artery coupling in heart failure with preserved ejection fraction. *Circ Heart Fail* 2015;**8**:542–550.
200. Caravita S, Dewachter C, Soranna D, D'Araujo SC, Khaldi A, Zambon A, et al. Haemodynamics to predict outcome in pulmonary hypertension due to left heart disease: a meta-analysis. *Eur Respir J* 2018;**51**:1702427.
201. Caravita S, Yerly P, Baratto C, Dewachter C, Faini A, Rimouche A, et al. Noninvasive versus invasive pressure-flow relationship of the pulmonary circulation: bias and error. *Eur Respir J* 2019;**54**:1900881.
202. Rosenzweig E, Abman S, Adatia I, Beghetti M, Bonnet D, Haworth S, et al. Paediatric pulmonary arterial hypertension: updates on definition, classification, diagnostics and management. *Eur Respir J* 2019;**53**:1801916.
203. Galiè N, Barberà JA, Frost AE, Ghofrani HA, Hoepfer MM, McLaughlin VV, et al. Initial use of ambrisentan plus tadalafil in pulmonary arterial hypertension. *N Engl J Med* 2015;**373**:834–844. doi:10.1056/NEJMoa1413687
204. Hoepfer MM, McLaughlin VV, Barberà JA, Frost AE, Ghofrani HA, Peacock AJ, et al. Initial combination therapy with ambrisentan and tadalafil and mortality in patients with pulmonary arterial hypertension: a secondary analysis of the results from the randomized, controlled AMBITION study. *Lancet Respir Med* 2016;**4**:894–901. doi:10.1016/S2213-2600(16)30307-1
205. Hoendermis ES, Liu LC, Hummel YM, van der Meer P, de Boer RA, Berger RM, et al. Effects of sildenafil on invasive haemodynamics and exercise capacity in heart failure patients with preserved ejection fraction and pulmonary hypertension: a randomized controlled trial. *Eur Heart J* 2015;**36**:2565–2573. doi:10.1093/eurheartj/ehv336
206. Guazzi M, Vicenzi M, Arena R, Guazzi MD. Pulmonary hypertension in heart failure with preserved ejection fraction: a target of phosphodiesterase-5 inhibition in a 1-year study. *Circulation* 2011;**124**:164–174. doi:10.1161/CIRCULATIONAHA.110.983866
207. Han MK, Bach DS, Hagan PG, Yow E, Flaherty KR, Toews GB, et al. Sildenafil preserves exercise capacity in patients with idiopathic pulmonary fibrosis and right-sided ventricular dysfunction. *Chest* 2013;**143**:1699–1708. doi:10.1378/chest.12-1594
208. Ghofrani HA, Wiedemann R, Rose F, Schermuly RT, Olschewski H, Weissmann N, et al. Sildenafil for treatment of lung fibrosis and pulmonary hypertension: a randomized controlled trial. *Lancet* 2002;**360**:895–900. doi:10.1016/S0140-6736(02)11024-5
209. Jais X, Brenot P, Bouvaist H, Jevnikar M, Canuet M, Chabanne C, et al. Balloon pulmonary angioplasty versus riociguat for the treatment of inoperable chronic thromboembolic pulmonary hypertension (RACE): a multicentre, phase 3, open-label, randomised controlled trial and ancillary follow-up study. *Lancet Respir Med* 2022; [https://doi.org/10.1016/S2213-2600\(22\)00214-4](https://doi.org/10.1016/S2213-2600(22)00214-4).
210. Boucly A, Savale L, Jais X, Bauer F, Bergot E, Bertoletti L, et al. Association between initial treatment strategy and long-term survival in pulmonary arterial hypertension. *Am J Respir Crit Care Med* 2021;**204**:842–854. doi:10.1164/rccm.202009-3698OC
211. Hoepfer MM, Pausch C, Grunig E, Staehler G, Huscher D, Pittrow D, et al. Temporal trends in pulmonary arterial hypertension: results from the COMPERA registry. *Eur Respir J* 2022;**59**:2102024. doi:10.1183/13993003.02024-2021
212. Zelt JGE, Sugarman J, Weatherald J, Partridge ACR, Liang JC, Swiston J, et al. Mortality trends in pulmonary arterial hypertension in Canada: a temporal analysis of survival per ESC/ERS guideline era. *Eur Respir J*. 2022;**59**:2101552. doi:10.1183/13993003.01552-2021
213. Sitbon O, Sattler C, Bertoletti L, Savale L, Cottin V, Jais X, et al. Initial dual oral combination therapy in pulmonary arterial hypertension. *Eur Respir J* 2016;**47**:1727–1736. doi:10.1183/13993003.02043-2015
214. Sitbon O, Cottin V, Canuet M, Clerson P, Gressin V, Perchenet L, et al. Initial combination therapy of macitentan and tadalafil in pulmonary arterial hypertension. *Eur Respir J* 2020;**56**:2000673.
215. Chin KM, Sitbon O, Doelberg M, Feldman J, Gibbs JSR, Grunig E, et al. Three- versus two-drug therapy for patients with newly diagnosed pulmonary arterial hypertension. *J Am Coll Cardiol* 2021;**78**:1393–1403. doi:10.1016/j.jacc.2021.07.057
216. Kramer T, Dumitrescu D, Gerhardt F, Orlova K, Ten Freyhaus H, Hellmich M, et al. Therapeutic potential of phosphodiesterase type 5 inhibitors in heart failure with preserved ejection fraction and combined post- and pre-capillary pulmonary hypertension. *Int J Cardiol* 2019;**283**:152–158. doi:10.1016/j.ijcard.2018.12.078
217. Opitz CF, Hoepfer MM, Gibbs JS, Kaemmerer H, Pepke-Zaba J, Coghlan JG, et al. Pre-capillary, combined, and post-capillary pulmonary hypertension: a pathophysiological continuum. *J Am Coll Cardiol* 2016;**68**:368–378. doi:10.1016/j.jacc.2016.05.047
218. Redfield MM, Chen HH, Borlaug BA, Semigran MJ, Lee KL, Lewis G, et al. Effect of phosphodiesterase-5 inhibition on exercise capacity and clinical status in heart failure with preserved ejection fraction: a randomized clinical trial. *JAMA* 2013;**309**:1268–1277. doi:10.1001/jama.2013.2024
219. Hoepfer MM, Behr J, Held M, Grunig E, Vizza CD, Vonk-Noordegraaf A, et al. Pulmonary hypertension in patients with chronic fibrosing idiopathic interstitial pneumonias. *PLoS One* 2015;**10**:e0141911. doi:10.1371/journal.pone.0141911
220. Nathan SD, Behr J, Collard HR, Cottin V, Hoepfer MM, Martinez FJ, et al. Riociguat for idiopathic interstitial pneumonia-associated pulmonary hypertension (RISE-IIP): a randomised, placebo-controlled phase 2b study. *Lancet Respir Med* 2019;**7**:780–790. doi:10.1016/S2213-2600(19)30250-4
221. Idiopathic Pulmonary Fibrosis Clinical Research Network, Zisman DA, Schwarz M, Anstrom KJ, Collard HR, Flaherty KR, et al. A controlled trial of sildenafil in

- advanced idiopathic pulmonary fibrosis. *N Engl J Med* 2010;**363**:620–628. doi: 10.1056/NEJMoa1002110
222. Kolb M, Raghu G, Wells AU, Behr J, Richeldi L, Schinzel B, et al. Nintedanib plus sildenafil in patients with idiopathic pulmonary fibrosis. *N Engl J Med* 2018;**379**:1722–1731. doi:10.1056/NEJMoa1811737
  223. Jais X, Brenot P, Bouvaist H, Jevnikar M, Canuet M, Chabanne C, et al. Late breaking abstract - balloon pulmonary angioplasty versus riociguat for the treatment of inoperable chronic thromboembolic pulmonary hypertension: results from the randomized controlled RACE study. *Eur Respir J* 2019;**54**:RCT1885.
  224. Jais X, Brenot P, Bouvaist H, Jevnikar M, Canuet M, Chabanne C, et al. Balloon pulmonary angioplasty versus riociguat for the treatment of inoperable chronic thromboembolic pulmonary hypertension (RACE): a multicentre, phase 3, open-label, randomised controlled trial and ancillary follow-up study. *Lancet Respir Med* 2022. doi:10.1016/S2213-2600(22)00214-4 (in press).
  225. Wiedenroth CB, Ghofrani HA, Adameit MSD, Breithecker A, Haas M, Kriechbaum S, et al. Sequential treatment with riociguat and balloon pulmonary angioplasty for patients with inoperable chronic thromboembolic pulmonary hypertension. *Pulm Circ* 2018;**8**:2045894018783996.
  226. Hug KP, Coghlan JG, Cannon J, Taboada D, Toshner M, Sheares K, et al. Serial right heart catheter assessment between balloon pulmonary angioplasty sessions identify procedural factors that influence response to treatment. *J Heart Lung Transplant* 2021;**40**:1223–1234. doi:10.1016/j.healun.2021.06.011
  227. Koh ET, Lee P, Gladman DD, Abu-Shakra M. Pulmonary hypertension in systemic sclerosis: an analysis of 17 patients. *Br J Rheumatol* 1996;**35**:989–993. doi:10.1093/rheumatology/35.10.989
  228. Lefèvre G, Dauchet L, Hachulla E, Montani D, Sobanski V, Lambert M et al., Survival and prognostic factors in systemic sclerosis-associated pulmonary hypertension: a systematic review and meta-analysis. *Arthritis Rheum* 2013;**65**:2412–2423. doi:10.1002/art.38029
  229. Hachulla E, Gressin V, Guillevin L, Carpentier P, Diot E, Sibilia J, et al. Early detection of pulmonary arterial hypertension in systemic sclerosis: a French nationwide prospective multicenter study. *Arthritis Rheum* 2005;**52**:3792–3793. doi:10.1002/art.21433
  230. Humbert M, Yaici A, de Groote P, Montani D, Sitbon O, Launay D, et al. Screening for pulmonary arterial hypertension in patients with systemic sclerosis: clinical characteristics at diagnosis and long-term survival. *Arthritis Rheum* 2011;**63**:3522–3530. doi:10.1002/art.30541
  231. Kiely DG, Lawrie A, Humbert M. Screening strategies for pulmonary arterial hypertension. *Eur Heart J Suppl* 2019;**21**:K9–K20. doi:10.1093/eurheartj/suz204
  232. Coghlan JG, Denton CP, Grünig E, Bonderman D, Distler O, Khanna D, et al. Evidence-based detection of pulmonary arterial hypertension in systemic sclerosis: the DETECT study. *Ann Rheum Dis* 2014;**73**:1340–1349. doi:10.1136/annrheumdis-2013-203301
  233. Thakkar V, Stevens W, Prior D, Youssef P, Liew D, Gabbay E, et al. The inclusion of N-terminal pro-brain natriuretic peptide in a sensitive screening strategy for systemic sclerosis-related pulmonary arterial hypertension: a cohort study. *Arthritis Res Ther* 2013;**15**:R193. doi: 10.1186/ar438
  234. Hao Y, Thakkar V, Stevens W, Morrisroe K, Prior D, Rabusa C, et al. A comparison of the predictive accuracy of three screening models for pulmonary arterial hypertension in systemic sclerosis. *Arthritis Res Ther* 2015;**17**:7. doi:10.1186/s13075-015-0517-5
  235. Vandecasteele E, Drieghe B, Melsens K, Thevissen K, De Pauw M, Descheppe E, et al. Screening for pulmonary arterial hypertension in an unselected prospective systemic sclerosis cohort. *Eur Respir J* 2017;**49**:1600227. doi:10.1183/13993003.02275-2016
  236. Morrisroe K, Stevens W, Sahhar J, Rabusa C, Nikpour M, Proudman S, et al. Epidemiology and disease characteristics of systemic sclerosis-related pulmonary arterial hypertension: results from a real-life screening programme. *Arthritis Res Ther* 2017;**19**:42. doi:10.1186/s13075-017-1250-z
  237. Pauling JD, McHugh NJ. Evaluating factors influencing screening for pulmonary hypertension in systemic sclerosis: does disparity between available guidelines influence clinical practice? *Clin Rheumatol* 2012;**31**:357–361. doi:10.1007/s10067-011-1844-9
  238. Mangat P, Conron M, Gabbay E, Proudman SM. Scleroderma lung disease, variation in screening, diagnosis and treatment practices between rheumatologists and respiratory physicians. *Intern Med J* 2010;**40**:494–502. doi:10.1111/j.1445-5994.2009.01990.x
  239. Mihai C, Antic M, Dobrota R, Bonderman D, Chadha-Boreham H, Coghlan JG, et al. Factors associated with disease progression in early-diagnosed pulmonary arterial hypertension associated with systemic sclerosis: longitudinal data from the DETECT cohort. *Ann Rheum Dis* 2018;**77**:128–132. doi:10.1136/annrheumdis-2017-211480
  240. Morrisroe K, Huq M, Stevens W, Rabusa C, Proudman SM, Nikpour M, et al. Risk factors for development of pulmonary arterial hypertension in Australian systemic sclerosis patients: results from a large multicenter cohort study. *BMC Pulm Med* 2016;**16**:134. doi:10.1186/s12890-016-0296-z
  241. Semalulu T, Rudski L, Huynh T, Langleben D, Wang M, Canadian Scleroderma Research Group, et al. An evidence-based strategy to screen for pulmonary arterial hypertension in systemic sclerosis. *Semin Arthritis Rheum* 2020;**50**:1421–1427. doi: 10.1016/j.semarthrit.2020.02.01
  242. Smith V, Vanhaecke A, Vandecasteele E, Guerra M, Paolino S, Melsens K, et al. Nailfold videocapillaroscopy in systemic sclerosis-related pulmonary arterial hypertension: a systematic literature review. *J Rheumatol* 2020;**47**:888–895. doi:10.3899/jrheum.190296
  243. Kylhammar D, Hesselstrand R, Nielsen S, Scheele C, Rådegran G. Angiogenic and inflammatory biomarkers for screening and follow-up in patients with pulmonary arterial hypertension. *Scand J Rheumatol* 2018;**47**:319–324. doi:10.1080/03009742.2017.1378714
  244. Santaniello A, Casella R, Vicenzi M, Rota I, Montanelli G, De Santis M, et al. Cardiopulmonary exercise testing in a combined screening approach to individuate pulmonary arterial hypertension in systemic sclerosis. *Rheumatology* 2020;**59**:1581–1586. doi:10.1093/rheumatology/kez473
  245. Hagger D, Condliffe R, Woodhouse N, Elliot CA, Armstrong IJ, Davies C, et al. Ventricular mass index correlates with pulmonary artery pressure and predicts survival in suspected systemic sclerosis-associated pulmonary arterial hypertension. *Rheumatology* 2009;**48**:1137–1142. doi:10.1093/rheumatology/kep187
  246. Rajaram S, Swift AJ, Capener D, Elliot CA, Condliffe R, Davies C, et al. Comparison of the diagnostic utility of cardiac magnetic resonance imaging, computed tomography, and echocardiography in assessment of suspected pulmonary arterial hypertension in patients with connective tissue disease. *J Rheumatol* 2012;**39**:1265–1274. doi:10.3899/jrheum.110987
  247. Galiè N, Humbert M, Vachiery JL, Gibbs S, Lang I, Torbicki A, et al. 2015 ESC/ERS Guidelines for the diagnosis and treatment of pulmonary hypertension: the joint task force for the diagnosis and treatment of pulmonary hypertension of the European society of cardiology (ESC) and the European respiratory society (ERS); endorsed by: Association for European paediatric and congenital cardiology (AEPC), international society for heart and lung transplantation (ISHLT). *Eur Heart J* 2016;**37**:67–119. doi:10.1093/eurheartj/ehv317
  248. Khanna D, Gladue H, Channick R, Chung L, Distler O, Furst DE, et al. Recommendations for screening and detection of connective tissue disease-associated pulmonary arterial hypertension. *Arthritis Rheum* 2013;**65**:3194–3201. doi: 10.1002/art.38172
  249. Weatherald J, Montani D, Jevnikar M, Jais X, Savale L, Humbert M. Screening for pulmonary arterial hypertension in systemic sclerosis. *Eur Respir Rev* 2019;**28**:190023. doi: 10.1183/16000617.0023-2019
  250. Galiè N, Humbert M, Vachiery J-L, Gibbs S, Lang I, Torbicki A, et al. 2015 ESC/ERS Guidelines for the diagnosis and treatment of pulmonary hypertension. *Eur Respir J* 2015;**46**:903. doi:10.1183/13993003.01032-2015
  251. Benza RL, Gomberg-Maitland M, Elliott CG, Farber HW, Foreman AJ, Frost AE, et al. Predicting survival in patients with pulmonary arterial hypertension: the REVEAL risk score calculator 2.0 and comparison with ESC/ERS-based risk assessment strategies. *Chest* 2019;**156**:323–337. doi:10.1016/j.chest.2019.02.004
  252. Zelt JGE, Hossain A, Sun LY, Mehta S, Chandy G, Davies RA, et al. Incorporation of renal function in mortality risk assessment for pulmonary arterial hypertension. *J Heart Lung Transplant* 2020;**39**:675–685. doi:10.1016/j.healun.2020.03.026
  253. Kylhammar D, Kjellström B, Hjalmarsson C, Jansson K, Nisell M, Söderberg S, et al. A comprehensive risk stratification at early follow-up determines prognosis in pulmonary arterial hypertension. *Eur Heart J* 2018;**39**:4175–4181. doi:10.1093/eurheartj/ehx257
  254. Hoepfer MM, Kramer T, Pan Z, Eichstaedt CA, Spiesshoefer J, Benjamin N, et al. Mortality in pulmonary arterial hypertension: prediction by the 2015 European pulmonary hypertension guidelines risk stratification model. *Eur Respir J* 2017;**50**:1700740. doi:10.1183/13993003.00740-2017
  255. Boucly A, Weatherald J, Savale L, Jais X, Cottin V, Prevot G, et al. Risk assessment, prognosis and guideline implementation in pulmonary arterial hypertension. *Eur Respir J* 2017;**50**:1700889. doi:10.1183/13993003.00889-2017
  256. Kylhammar D, Hjalmarsson C, Hesselstrand R, Jansson K, Kavianipour M, Kjellström B, et al. Predicting mortality during long-term follow-up in pulmonary arterial hypertension. *ERJ Open Res* 2021;**7**:00837-2020. doi:10.1183/23120541.00837-2020
  257. Sitbon O, Chin KM, Channick RN, Benza RL, Di Scala L, Gaine S, et al. Risk assessment in pulmonary arterial hypertension: Insights from the GRIPHON study. *J Heart Lung Transplant* 2020;**39**:300–309. doi:10.1016/j.healun.2019.12.013
  258. Anderson JJ, Lau EM, Lavender M, Benza R, Celermajer DS, Collins N, et al. Retrospective validation of the REVEAL 2.0 risk score with the Australian and New Zealand pulmonary hypertension registry cohort. *Chest* 2020;**157**:162–172. doi:10.1016/j.chest.2019.08.2203
  259. D'Alto M, Badagliacca R, Lo Giudice F, Argiento P, Casu G, Corda M, et al. Hemodynamics and risk assessment 2 years after the initiation of upfront

- ambrisentan-tadalafil in pulmonary arterial hypertension. *J Heart Lung Transplant* 2020;**39**:1389–1397. doi:10.1016/j.healun.2020.08.016
260. Tonelli AR, Sahay S, Gordon KW, Edwards LD, Allmon AG, Broderick M, et al. Impact of inhaled treprostinil on risk stratification with noninvasive parameters: a post hoc analysis of the TRIUMPH and BEAT studies. *Pulm Circ* 2020;**10**:2045894020977025. doi:10.1177/2045894020977025
261. Olsson KM, Richter MJ, Kamp JC, Gall H, Heine A, Ghofrani HA, et al. Intravenous treprostinil as an add-on therapy in patients with pulmonary arterial hypertension. *J Heart Lung Transplant* 2019;**38**:748–756. doi:10.1016/j.healun.2019.05.002
262. White RJ, Jerjes-Sanchez C, Bohns Meyer GM, Pulido T, Sepulveda P, Wang KY, et al. Combination therapy with oral treprostinil for pulmonary arterial hypertension. A double-blind placebo-controlled clinical trial. *Am J Respir Crit Care Med* 2020;**201**:707–717. doi:10.1164/rccm.201908-1640OC
263. Humbert M, Farber HW, Ghofrani HA, Benza RL, Busse D, Meier C, et al. Risk assessment in pulmonary arterial hypertension and chronic thromboembolic pulmonary hypertension. *Eur Respir J* 2019;**53**:1802004. doi:10.1183/13993003.02004-2018
264. Rosenkranz S, Gibbs JS, Wachter R, De Marco T, Vonk-Noordegraaf A, Vachiery JL. Left ventricular heart failure and pulmonary hypertension. *Eur Heart J* 2016;**37**:942–954.
265. Vachiery JL, Tedford RJ, Rosenkranz S, Palazzini M, Lang I, Guazzi M, et al. Pulmonary hypertension due to left heart disease. *Eur Respir J* 2019;**53**:1801897.
266. Lewis GD, Shah R, Shahzad K, Camuso JM, Pappagianopoulos PP, Hung J, et al. Sildenafil improves exercise capacity and quality of life in patients with systolic heart failure and secondary pulmonary hypertension. *Circulation* 2007;**116**:1555–1562.
267. Vachiery JL, Delcroix M, Al-Hiti H, Efficace M, Hutyra M, Lack G, et al. Macitentan in pulmonary hypertension due to left ventricular dysfunction. *Eur Respir J* 2018;**51**:1701886.
268. Kalusi E, Cotter G, Leitman M, Milo-Cotter O, Krakover R, Kobrin I, et al. Clinical and hemodynamic effects of bosentan dose optimization in symptomatic heart failure patients with severe systolic dysfunction, associated with secondary pulmonary hypertension—a multi-center randomized study. *Cardiology* 2008;**109**:273–280.
269. Koller B, Steringer-Mascherbauer R, Ebner CH, Weber T, Ammer M, Eichinger J, et al. Pilot study of endothelin receptor blockade in heart failure with diastolic dysfunction and pulmonary hypertension (BADDHY-trial). *Heart Lung Circ* 2017;**26**:433–441.
270. Bermejo J, Yotti R, Garcia-Orta R, Sanchez-Fernandez PL, Castano M, Segovia-Cubero J, et al. Sildenafil for improving outcomes in patients with corrected valvular heart disease and persistent pulmonary hypertension: a multicenter, double-blind, randomized clinical trial. *Eur Heart J* 2018;**39**:1255–1264.
271. Wu X, Yang T, Zhou Q, Li S, Huang L. Additional use of a phosphodiesterase 5 inhibitor in patients with pulmonary hypertension secondary to chronic systolic heart failure: A meta-analysis. *Eur J Heart Fail* 2014;**16**:444–453.
272. Cao JY, Wales KM, Cordina R, Lau EMT, Celermajer DS. Pulmonary vasodilator therapies are of no benefit in pulmonary hypertension due to left heart disease: A meta-analysis. *Int J Cardiol*. 2018;**273**:213–220.
273. Bonderman D, Ghio S, Felix SB, Ghofrani HA, Michelakis E, Mitrovic V, et al. Riociguat for patients with pulmonary hypertension caused by systolic left ventricular dysfunction: a phase IIb double-blind, randomized, placebo-controlled, dose-ranging hemodynamic study. *Circulation*. 2013;**128**:502–511.
274. Dumitrescu D, Seck C, Mohle L, Erdmann E, Rosenkranz S. Therapeutic potential of sildenafil in patients with heart failure and reactive pulmonary hypertension. *Int J Cardiol* 2012;**154**:205–206.
275. Zeder K, Avian A, Bachmaier G, Douschan P, Foris V, Sassmann T, et al. Elevated pulmonary vascular resistance predicts mortality in COPD patients. *Eur Respir J* 2021;**58**:2100944.
276. Vitolo P, Stanzola A, Confalonieri M, Libertucci D, Oggionni T, Rottoli P, et al. Sildenafil in severe pulmonary hypertension associated with chronic obstructive pulmonary disease: A randomized controlled multicenter clinical trial. *J Heart Lung Transplant* 2017;**36**:166–174.
277. Vizza CD, Hoeper MM, Huscher D, Pittrow D, Benjamin N, Olsson KM, et al. Pulmonary hypertension in patients with COPD: results from COMPERA. *Chest* 2021;**160**:678–689.
278. Waxman A, Restrepo-Jaramillo R, Thenappan T, Ravichandran A, Engel P, Bajwa A, et al. Inhaled treprostinil in pulmonary hypertension due to interstitial lung disease. *N Engl J Med* 2021;**384**:325–334.
279. Ejiri K, Ogawa A, Fujii S, Ito H, Matsubara H. Vascular injury is a major cause of lung injury after balloon pulmonary angioplasty in patients with chronic thromboembolic pulmonary hypertension. *Circ Cardiovasc Interv* 2018;**11**:e005884.
280. Sugimura K, Fukumoto Y, Satoh K, Nochioka K, Miura Y, Aoki T, et al. Percutaneous transluminal pulmonary angioplasty markedly improves pulmonary hemodynamics and long-term prognosis in patients with chronic thromboembolic pulmonary hypertension. *Circ J* 2012;**76**:485–488.
281. Ogawa A, Satoh T, Fukuda T, Sugimura K, Fukumoto Y, Emoto N, et al. Balloon pulmonary angioplasty for chronic thromboembolic pulmonary hypertension: results of a multicenter registry. *Circ Cardiovasc Qual Outcomes* 2017;**10**:e004029.
282. Inami T, Kataoka M, Yanagisawa R, Ishiguro H, Shimura N, Fukuda K, et al. Long-term outcomes after percutaneous transluminal pulmonary angioplasty for chronic thromboembolic pulmonary hypertension. *Circulation* 2016;**134**:2030–2032.
283. Brenot P, Jais X, Taniguchi Y, Garcia Alonso C, Gerardin B, Mussot S, et al. French experience of balloon pulmonary angioplasty for chronic thromboembolic pulmonary hypertension. *Eur Respir J* 2019;**53**:1802095.
284. Darocha S, Pietura R, Pietrasik A, Norwa J, Dobosiewicz A, Pilka M, et al. Improvement in quality of life and hemodynamics in chronic thromboembolic pulmonary hypertension treated with balloon pulmonary angioplasty. *Circ J* 2017;**81**:552–557.
285. Fukui S, Ogo T, Morita Y, Tsuji A, Tateishi E, Ozaki K, et al. Right ventricular reverse remodelling after balloon pulmonary angioplasty. *Eur Respir J* 2014;**43**:1394–1402.
286. Kataoka M, Inami T, Hayashida K, Shimura N, Ishiguro H, Abe T, et al. Percutaneous transluminal pulmonary angioplasty for the treatment of chronic thromboembolic pulmonary hypertension. *Circ Cardiovasc Interv* 2012;**5**:756–762.
287. Mizoguchi H, Ogawa A, Munemasa M, Mikouchi H, Ito H, Matsubara H. Refined balloon pulmonary angioplasty for inoperable patients with chronic thromboembolic pulmonary hypertension. *Circ Cardiovasc Interv* 2012;**5**:748–755.
288. Olsson KM, Wiedenroth CB, Kamp JC, Breithecker A, Fuge J, Krombach GA, et al. Balloon pulmonary angioplasty for inoperable patients with chronic thromboembolic pulmonary hypertension: the initial German experience. *Eur Respir J* 2017;**49**:1602409.
289. Ghofrani HA, D'Armini AM, Grimminger F, Hoeper MM, Jansa P, Kim NH, et al. Riociguat for the treatment of chronic thromboembolic pulmonary hypertension. *N Engl J Med* 2013;**369**:319–329.
290. Sadushi-Kolici R, Jansa P, Kopec G, Torbicki A, Skoro-Sajer N, Campean IA, et al. Subcutaneous treprostinil for the treatment of severe non-operable chronic thromboembolic pulmonary hypertension (CTREPH): a double-blind, phase 3, randomized controlled trial. *Lancet Respir Med* 2019;**7**:239–248.
291. Ghofrani HA, Simonneau G, D'Armini AM, Fedullo P, Howard LS, Jais X, et al. Macitentan for the treatment of inoperable chronic thromboembolic pulmonary hypertension (MERIT-1): results from the multicentre, phase 2, randomised, double-blind, placebo-controlled study. *Lancet Respir Med* 2017;**5**:785–794.
292. Simonneau G, D'Armini AM, Ghofrani HA, Grimminger F, Jansa P, Kim NH, et al. Predictors of long-term outcomes in patients treated with riociguat for chronic thromboembolic pulmonary hypertension: data from the CHEST-2 open-label, randomised, long-term extension trial. *Lancet Respir Medicine* 2016;**4**:372–380.
